# Supplementary material for: Differential symbiotic compatibilities between rhizobium strains and cultivated and wild soybeans revealed by anatomical and transcriptome analyses
Source: Front Plant Sci. 2024 Sep 3;15:1435632. doi: 10.3389/fpls.2024.1435632 (PMC11405202; doi:10.3389/fpls.2024.1435632)
Supplement: Supplementary file 1 [file Table1.xlsx]

## Sheet: Supplementary Table 1
Supplementary Table 1: List of differentially expressed genes identified in the G. soja USDA110 vs LVM105 comparison.
Gene ID	base Mean	log2 Fold Change	lfc SE	p value	p adj	Annotation
Glyma.20G167500	112.194	7.23131	0.714442	2.88902e-23	8.04492e-22	UniRef100_Q2TUW1 Abscisic stress ripening-like protein n=2 Tax=Soja TaxID=1462606 RepID=Q2TUW1_SOYBN
Glyma.04G031500	56.9536	7.12282	0.976463	1.44857e-12	2.07117e-11	UniRef100_K7KHU8 AMP-binding domain-containing protein n=2 Tax=Soja TaxID=1462606 RepID=K7KHU8_SOYBN
Glyma.15G258200	8.65266	6.84932	2.61747	6.89002e-07	5.36192e-06	UniRef100_K7MDZ5 CCT domain-containing protein n=2 Tax=Soja TaxID=1462606 RepID=K7MDZ5_SOYBN
Glyma.04G039900	66.0225	6.43747	0.727883	1.84811e-18	3.93099e-17	UniRef100_Q00M84 N-hydroxycinnamoyl/benzoyltransferase 6 n=1 Tax=Glycine max TaxID=3847 RepID=Q00M84_SOYBN
Glyma.08G161200	31.2009	6.1974	0.991618	8.53646e-10	9.4603e-09	UniRef100_A0A0R0IMT8 Uncharacterized protein n=2 Tax=Soja TaxID=1462606 RepID=A0A0R0IMT8_SOYBN
Glyma.03G013300	5.6988	5.99912	2.56717	1.45105e-05	9.12389e-05	UniRef100_I1JKB2 Uncharacterized protein n=1 Tax=Glycine max TaxID=3847 RepID=I1JKB2_SOYBN
Glyma.03G029900	33.732	5.81429	0.842853	7.83508e-12	1.06064e-10	UniRef100_A0A0B2RM34 Cytochrome P450 83B1 n=2 Tax=Soja TaxID=1462606 RepID=A0A0B2RM34_GLYSO
Glyma.07G014500	47.9164	5.65338	0.673762	4.80511e-17	9.37581e-16	UniRef100_P15490 Stem 28 kDa glycoprotein n=2 Tax=Glycine max TaxID=3847 RepID=VSPA_SOYBN
Glyma.18G130100	4.87742	5.62718	2.57915	5.52776e-05	0.000311996	UniRef100_I1N1B7 Glycosyltransferase family 92 protein n=1 Tax=Glycine max TaxID=3847 RepID=I1N1B7_SOYBN
Glyma.10G174900	3.91053	5.09496	2.59025	0.00022557	0.00112418	UniRef100_K7LJZ6 Uncharacterized protein n=3 Tax=Soja TaxID=1462606 RepID=K7LJZ6_SOYBN
Glyma.19G026600	15.2852	5.05672	1.04535	8.49768e-07	6.53836e-06	UniRef100_K7MW57 Purple acid phosphatase n=1 Tax=Glycine max TaxID=3847 RepID=K7MW57_SOYBN
Glyma.14G110000	4.01049	5.0433	2.6708	0.000365441	0.0017401	UniRef100_K7M666 CDC24_OB2 domain-containing protein n=2 Tax=Soja TaxID=1462606 RepID=K7M666_SOYBN
Glyma.01G069150	8.6122	4.86333	1.37325	2.24251e-05	0.000136881	NA
Glyma.06G257500	8.6264	4.85967	1.38154	2.43029e-05	0.000147471	UniRef100_I1KE70 Receptor-like serine/threonine-protein kinase n=1 Tax=Glycine max TaxID=3847 RepID=I1KE70_SOYBN
Glyma.07G178500	23.0703	4.52343	0.719145	1.18794e-10	1.43928e-09	UniRef100_A0A0B2QX63 Myb family transcription factor EFM n=2 Tax=Soja TaxID=1462606 RepID=A0A0B2QX63_GLYSO
Glyma.04G076900	341.873	4.43756	0.184998	5.15918e-128	1.84489e-125	UniRef100_I1JUN8 Uncharacterized protein n=5 Tax=Soja TaxID=1462606 RepID=I1JUN8_SOYBN
Glyma.13G301800	368.002	4.3611	0.179076	8.24607e-132	3.07034e-129	UniRef100_I1M3X6 Uncharacterized protein n=1 Tax=Glycine max TaxID=3847 RepID=I1M3X6_SOYBN
Glyma.11G105800	77.3106	4.35215	0.374899	1.53113e-31	6.30556e-30	UniRef100_C6SWQ1 J domain-containing protein n=2 Tax=Soja TaxID=1462606 RepID=C6SWQ1_SOYBN
Glyma.04G157800	33.865	4.3138	0.559741	4.53941e-15	7.84825e-14	UniRef100_A0A445L0R6 Potassium channel SKOR n=2 Tax=Soja TaxID=1462606 RepID=A0A445L0R6_GLYSO
Glyma.06G291900	23.5514	4.28813	0.677562	6.56657e-11	8.16683e-10	UniRef100_K7KY29 BHLH domain-containing protein n=3 Tax=Soja TaxID=1462606 RepID=K7KY29_SOYBN
Glyma.01G178800	23.1335	4.28441	1.26175	2.77335e-05	0.000166139	UniRef100_K7K4H2 Uncharacterized protein n=1 Tax=Glycine max TaxID=3847 RepID=K7K4H2_SOYBN
Glyma.08G273600	2.93141	4.28216	2.68291	0.00118592	0.00500256	UniRef100_I1KX41 Uncharacterized protein n=1 Tax=Glycine max TaxID=3847 RepID=I1KX41_SOYBN
Glyma.05G225900	220.091	4.22469	0.217971	2.75561e-84	4.40373e-82	UniRef100_A0A0B2R4Q7 Uncharacterized protein n=2 Tax=Soja TaxID=1462606 RepID=A0A0B2R4Q7_GLYSO
Glyma.12G030700	25.9219	4.19694	0.635614	7.85838e-12	1.0634e-10	UniRef100_C6TF68 J domain-containing protein n=1 Tax=Glycine max TaxID=3847 RepID=C6TF68_SOYBN
Glyma.12G114300	6.19835	4.18462	1.43857	0.000194634	0.000981806	UniRef100_A0A0B2RQ84 Transcription factor bHLH162 isoform A n=2 Tax=Soja TaxID=1462606 RepID=A0A0B2RQ84_GLYSO
Glyma.12G212900	752.754	4.18445	0.128852	2.05107e-232	2.84917e-229	UniRef100_K7LW78 Uncharacterized protein n=1 Tax=Glycine max TaxID=3847 RepID=K7LW78_SOYBN
Glyma.11G171400	71.516	4.15946	0.38722	1.83043e-27	6.19586e-26	UniRef100_I1LLM2 Asparagine synthetase [glutamine-hydrolyzing] n=1 Tax=Glycine max TaxID=3847 RepID=I1LLM2_SOYBN
Glyma.13G267500	33.5231	4.12854	0.543987	7.99079e-15	1.36198e-13	UniRef100_K7M256 WRKY domain-containing protein n=2 Tax=Soja TaxID=1462606 RepID=K7M256_SOYBN
Glyma.15G031400	157.048	4.11265	0.264557	6.35522e-55	5.20479e-53	UniRef100_A0A445GNI8 Beta-glucosidase 11 isoform A n=3 Tax=Soja TaxID=1462606 RepID=A0A445GNI8_GLYSO
Glyma.03G185600	11.6395	4.08905	0.947632	4.14716e-06	2.86885e-05	UniRef100_A0A0R0KT13 Alpha-carbonic anhydrase domain-containing protein n=1 Tax=Glycine max TaxID=3847 RepID=A0A0R0KT13_SOYBN
Glyma.01G152000	54.59	4.08497	0.428458	2.22883e-22	5.88441e-21	UniRef100_I1J859 Uncharacterized protein n=2 Tax=Soja TaxID=1462606 RepID=I1J859_SOYBN
Glyma.06G139500	216.1	4.06049	0.211346	5.03029e-83	7.79738e-81	UniRef100_A0A0R0JN77 Uncharacterized protein n=2 Tax=Soja TaxID=1462606 RepID=A0A0R0JN77_SOYBN
Glyma.20G008400	96.2602	4.03637	0.311168	3.10357e-39	1.69067e-37	UniRef100_A0A0B2NUQ3 Uncharacterized protein n=2 Tax=Soja TaxID=1462606 RepID=A0A0B2NUQ3_GLYSO
Glyma.18G277800	35.1065	4.0354	0.516557	9.98048e-16	1.81047e-14	UniRef100_K7MV47 Uncharacterized protein n=2 Tax=Soja TaxID=1462606 RepID=K7MV47_SOYBN
Glyma.13G179200	763.832	3.96401	0.117512	1.17824e-250	2.36413e-247	UniRef100_A0A0B2PKT3 Uncharacterized protein n=2 Tax=Soja TaxID=1462606 RepID=A0A0B2PKT3_GLYSO
Glyma.06G120400	73.3458	3.95835	0.356379	1.10985e-29	4.15384e-28	UniRef100_K7KUL8 Protein kinase domain-containing protein n=1 Tax=Glycine max TaxID=3847 RepID=K7KUL8_SOYBN
Glyma.18G018100	212.658	3.95267	0.209538	3.44415e-80	5.16151e-78	UniRef100_I1MYT2 Trehalose 6-phosphate phosphatase n=2 Tax=Soja TaxID=1462606 RepID=I1MYT2_SOYBN
Glyma.07G125600	401.888	3.94554	0.157118	3.88816e-140	1.73369e-137	UniRef100_C6TFU8 Uncharacterized protein n=2 Tax=Soja TaxID=1462606 RepID=C6TFU8_SOYBN
Glyma.01G225500	10.7873	3.89901	0.95242	8.03124e-06	5.29507e-05	UniRef100_I1JAD9 Uncharacterized protein n=2 Tax=Soja TaxID=1462606 RepID=I1JAD9_SOYBN
Glyma.12G200600	123.524	3.89793	0.270271	4.01449e-48	2.77761e-46	UniRef100_A0A445HSW0 Uncharacterized protein n=3 Tax=Soja TaxID=1462606 RepID=A0A445HSW0_GLYSO
Glyma.15G168800	2.7423	3.8669	2.91098	0.00253478	0.00975941	UniRef100_I1MH62 Homeobox domain-containing protein n=2 Tax=Glycine max TaxID=3847 RepID=I1MH62_SOYBN
Glyma.04G055801	5.2246	3.86273	1.51342	0.000597961	0.00272271	UniRef100_UPI000E21B684 uncharacterized protein LOC102666081 n=1 Tax=Glycine max TaxID=3847 RepID=UPI000E21B684
Glyma.12G036102	2.62022	3.80943	2.86064	0.00250663	0.00966499	NA
Glyma.01G181900	125.585	3.78812	0.263455	1.63656e-47	1.10275e-45	UniRef100_I1J926 Uncharacterized protein n=2 Tax=Glycine max TaxID=3847 RepID=I1J926_SOYBN
Glyma.08G307400	5.05346	3.77747	1.50597	0.000650253	0.00293272	UniRef100_I1KXZ5 Receptor-like serine/threonine-protein kinase n=2 Tax=Glycine max TaxID=3847 RepID=I1KXZ5_SOYBN
Glyma.05G206200	143.454	3.7603	0.242931	8.78977e-55	7.15e-53	UniRef100_A0A445KRC7 Protein LURP-one-related 4 isoform A n=2 Tax=Soja TaxID=1462606 RepID=A0A445KRC7_GLYSO
Glyma.03G225300	34.9879	3.75286	0.506432	1.33695e-14	2.24015e-13	UniRef100_A0A0B2PYF7 Uncharacterized protein n=2 Tax=Soja TaxID=1462606 RepID=A0A0B2PYF7_GLYSO
Glyma.06G286200	24.7553	3.74279	0.595392	4.14851e-11	5.2591e-10	UniRef100_A0A0B2PEG9 8-hydroxyquercetin 8-O-methyltransferase n=2 Tax=Soja TaxID=1462606 RepID=A0A0B2PEG9_GLYSO
Glyma.19G016600	63.9398	3.69581	0.360986	1.53855e-25	4.74127e-24	UniRef100_A0A445FAY9 ABC transporter B family member 15 isoform A n=1 Tax=Glycine soja TaxID=3848 RepID=A0A445FAY9_GLYSO
Glyma.07G229100	158.991	3.67311	0.40314	5.79538e-21	1.42292e-19	UniRef100_A0A0B2R399 NAC domain-containing protein 29 n=3 Tax=Soja TaxID=1462606 RepID=A0A0B2R399_GLYSO
Glyma.04G090000	6.96566	3.66074	1.17793	0.000342549	0.00163887	UniRef100_I1JV17 Uncharacterized protein n=2 Tax=Soja TaxID=1462606 RepID=I1JV17_SOYBN
Glyma.11G236500	406.509	3.62691	0.144352	4.19513e-140	1.84775e-137	UniRef100_C6SZY7 Uncharacterized protein n=2 Tax=Soja TaxID=1462606 RepID=C6SZY7_SOYBN
Glyma.02G228100	13788.3	3.6266	0.0659758	0	0	UniRef100_I1JHE4 Asparagine synthetase [glutamine-hydrolyzing] n=3 Tax=Soja TaxID=1462606 RepID=I1JHE4_SOYBN
Glyma.12G184366	43.3243	3.62283	0.427639	2.65222e-18	5.58544e-17	UniRef100_A0A445HS59 ABSCISIC ACID-INSENSITIVE 5-like protein 1 isoform E n=2 Tax=Soja TaxID=1462606 RepID=A0A445HS59_GLYSO
Glyma.12G200500	819.213	3.60611	0.123038	2.37132e-189	1.94648e-186	UniRef100_C6SWJ9 Uncharacterized protein n=2 Tax=Soja TaxID=1462606 RepID=C6SWJ9_SOYBN
Glyma.13G340250	18.1944	3.60298	0.677234	1.34645e-08	1.30445e-07	NA
Glyma.10G151000	24.4655	3.58165	0.569331	4.08185e-11	5.17822e-10	UniRef100_A0A0R0I161 Uncharacterized protein n=2 Tax=Soja TaxID=1462606 RepID=A0A0R0I161_SOYBN
Glyma.07G038900	4.67347	3.58139	1.58834	0.00123223	0.00517674	UniRef100_A0A445JRX2 Uncharacterized protein n=2 Tax=Soja TaxID=1462606 RepID=A0A445JRX2_GLYSO
Glyma.13G302000	28.3187	3.55487	0.545487	8.79558e-12	1.18622e-10	UniRef100_A0A0R0H8E0 Uncharacterized protein n=2 Tax=Soja TaxID=1462606 RepID=A0A0R0H8E0_SOYBN
Glyma.13G147200	37.213	3.54519	0.459953	1.28046e-15	2.30886e-14	UniRef100_K7LZT7 Uncharacterized protein n=1 Tax=Glycine max TaxID=3847 RepID=K7LZT7_SOYBN
Glyma.11G170300	495.7	3.52029	0.1338	1.4736e-153	8.31596e-151	UniRef100_A0A445I4G0 Asparagine synthetase [glutamine-hydrolyzing] n=2 Tax=Soja TaxID=1462606 RepID=A0A445I4G0_GLYSO
Glyma.07G044800	10.5491	3.49959	0.883145	1.11803e-05	7.18884e-05	UniRef100_K7KZN0 MADS-box domain-containing protein n=1 Tax=Glycine max TaxID=3847 RepID=K7KZN0_SOYBN
Glyma.01G077000	56.1344	3.49049	0.362785	7.38074e-23	2.01033e-21	UniRef100_Q39802 Cytokinin induced message n=2 Tax=Soja TaxID=1462606 RepID=Q39802_SOYBN
Glyma.07G044900	71.8258	3.4883	0.322635	4.28213e-28	1.49572e-26	UniRef100_I1KHI3 FLZ-type domain-containing protein n=1 Tax=Glycine max TaxID=3847 RepID=I1KHI3_SOYBN
Glyma.07G043000	47.6383	3.48671	0.392416	7.89799e-20	1.82854e-18	UniRef100_A0A445JS65 Dormancy-associated protein-like 4 isoform A n=2 Tax=Soja TaxID=1462606 RepID=A0A445JS65_GLYSO
Glyma.19G192900	6.54336	3.46458	1.18427	0.000486136	0.00225707	UniRef100_K7MZ72 Uncharacterized protein n=1 Tax=Glycine max TaxID=3847 RepID=K7MZ72_SOYBN
Glyma.17G069202	20.1146	3.45484	0.621083	4.00073e-09	4.12723e-08	UniRef100_A0A368UHY0 WAT1-related protein n=1 Tax=Glycine max TaxID=3847 RepID=A0A368UHY0_SOYBN
Glyma.13G301700	562.078	3.45013	0.130255	4.61922e-156	2.73496e-153	UniRef100_C6T1V6 Uncharacterized protein n=2 Tax=Soja TaxID=1462606 RepID=C6T1V6_SOYBN
Glyma.13G210500	10.3678	3.43896	0.905984	1.9044e-05	0.000117535	UniRef100_I1M166 Uncharacterized protein n=1 Tax=Glycine max TaxID=3847 RepID=I1M166_SOYBN
Glyma.13G134300	51.8133	3.43655	0.387298	9.24329e-20	2.13316e-18	UniRef100_A0A0R0GMX4 Uncharacterized protein n=2 Tax=Soja TaxID=1462606 RepID=A0A0R0GMX4_SOYBN
Glyma.20G017800	14.3612	3.43418	0.740711	4.51636e-07	3.60162e-06	UniRef100_E9L554 CLE08 protein n=2 Tax=Soja TaxID=1462606 RepID=E9L554_SOYBN
Glyma.06G079500	87.0016	3.41662	0.302965	1.72351e-30	6.715e-29	UniRef100_A0A0B2QEN6 Uncharacterized protein n=2 Tax=Soja TaxID=1462606 RepID=A0A0B2QEN6_GLYSO
Glyma.20G138900	299.579	3.41415	0.160994	1.57735e-100	3.62861e-98	UniRef100_I1NG71 Uncharacterized protein n=3 Tax=Soja TaxID=1462606 RepID=I1NG71_SOYBN
Glyma.01G211300	60.7061	3.409	0.344818	6.24029e-24	1.793e-22	UniRef100_A0A0R0LDR1 PMEI domain-containing protein n=1 Tax=Glycine max TaxID=3847 RepID=A0A0R0LDR1_SOYBN
Glyma.08G013100	157.605	3.40713	0.21525	2.69631e-57	2.33531e-55	UniRef100_A0A445J8H8 Protein LURP-one-related 4 n=2 Tax=Soja TaxID=1462606 RepID=A0A445J8H8_GLYSO
Glyma.11G239000	13.872	3.40397	0.753961	8.62421e-07	6.62865e-06	UniRef100_I7B2Z4 Putative ethylene insensitive 3-like 4 protein n=1 Tax=Glycine max TaxID=3847 RepID=I7B2Z4_SOYBN
Glyma.07G139300	60.974	3.40371	0.376877	9.52801e-21	2.31421e-19	UniRef100_I1KK51 Uncharacterized protein n=3 Tax=Soja TaxID=1462606 RepID=I1KK51_SOYBN
Glyma.08G350700	12.0179	3.39695	0.812007	3.75291e-06	2.61927e-05	UniRef100_K7LAP4 RING-type domain-containing protein n=1 Tax=Glycine max TaxID=3847 RepID=K7LAP4_SOYBN
Glyma.12G242400	4.21774	3.39054	1.5831	0.00164688	0.00668017	UniRef100_K7LWQ3 ANK_REP_REGION domain-containing protein n=2 Tax=Soja TaxID=1462606 RepID=K7LWQ3_SOYBN
Glyma.05G045800	8.37668	3.37526	1.04254	0.000133284	0.00069624	UniRef100_I1K087 Uncharacterized protein n=2 Tax=Soja TaxID=1462606 RepID=I1K087_SOYBN
Glyma.08G207900	143.397	3.37518	0.222687	8.23643e-53	6.24948e-51	UniRef100_P13088 Auxin-induced protein AUX22 n=3 Tax=Soja TaxID=1462606 RepID=AUX22_SOYBN
Glyma.01G006000	888.719	3.34353	0.105539	9.35083e-222	1.16456e-218	UniRef100_C6SYZ5 Uncharacterized protein n=1 Tax=Glycine max TaxID=3847 RepID=C6SYZ5_SOYBN
Glyma.10G063700	9.72096	3.32953	0.904699	2.94657e-05	0.000175352	UniRef100_I1L949 Uncharacterized protein n=1 Tax=Glycine max TaxID=3847 RepID=I1L949_SOYBN
Glyma.09G166400	9.56787	3.32187	0.914367	3.67837e-05	0.000215144	UniRef100_A0A445J1W4 Organic cation/carnitine transporter 1 isoform B n=3 Tax=Soja TaxID=1462606 RepID=A0A445J1W4_GLYSO
Glyma.14G209000	97.0177	3.29565	0.277784	3.14598e-33	1.37226e-31	UniRef100_I1MBQ1 Uncharacterized protein n=1 Tax=Glycine max TaxID=3847 RepID=I1MBQ1_SOYBN
Glyma.06G307900	16.787	3.28624	0.662314	8.22239e-08	7.2715e-07	UniRef100_A0A445KG75 Cellulose synthase-like protein H1 n=1 Tax=Glycine soja TaxID=3848 RepID=A0A445KG75_GLYSO
Glyma.13G322500	4.04053	3.28499	1.60624	0.00202229	0.0080069	UniRef100_I1M4H0 Xyloglucan endotransglucosylase/hydrolase n=2 Tax=Glycine max TaxID=3847 RepID=I1M4H0_SOYBN
Glyma.17G005000	22.5072	3.28075	0.578086	1.38524e-09	1.50017e-08	UniRef100_UPI0003DE992E uncharacterized protein LOC100527773 isoform X1 n=1 Tax=Glycine max TaxID=3847 RepID=UPI0003DE992E
Glyma.05G166900	4.2487	3.27651	1.60858	0.00178472	0.00716445	UniRef100_I1K481 Uncharacterized protein n=1 Tax=Glycine max TaxID=3847 RepID=I1K481_SOYBN
Glyma.09G214600	7.98977	3.27501	1.07988	0.000242473	0.00119981	UniRef100_I1L574 RING-type domain-containing protein n=1 Tax=Glycine max TaxID=3847 RepID=I1L574_SOYBN
Glyma.20G237200	28.8339	3.27154	0.526437	6.2281e-11	7.75656e-10	UniRef100_I1NJ28 Uncharacterized protein n=1 Tax=Glycine max TaxID=3847 RepID=I1NJ28_SOYBN
Glyma.13G170800	15.1977	3.26679	0.736047	8.73116e-07	6.70412e-06	UniRef100_K7M096 Uncharacterized protein n=2 Tax=Soja TaxID=1462606 RepID=K7M096_SOYBN
Glyma.13G129500	7.63517	3.26542	1.03025	0.000187643	0.000948377	UniRef100_C6T084 Uncharacterized protein n=2 Tax=Soja TaxID=1462606 RepID=C6T084_SOYBN
Glyma.12G200800	187.242	3.26447	0.193672	1.02078e-64	1.08433e-62	UniRef100_I1LUC9 Uncharacterized protein n=1 Tax=Glycine max TaxID=3847 RepID=I1LUC9_SOYBN
Glyma.07G070300	459.674	3.24574	0.128385	4.14316e-142	1.89416e-139	UniRef100_A0A0R0J4K3 Uncharacterized protein n=2 Tax=Glycine max TaxID=3847 RepID=A0A0R0J4K3_SOYBN
Glyma.13G053700	9.74083	3.24071	0.925697	4.44079e-05	0.000255639	UniRef100_A0A0R0GIK5 Protein kinase domain-containing protein n=1 Tax=Glycine max TaxID=3847 RepID=A0A0R0GIK5_SOYBN
Glyma.05G082400	324.439	3.23563	0.15001	4.47352e-104	1.07713e-101	UniRef100_I1K225 NB-ARC domain-containing protein n=2 Tax=Soja TaxID=1462606 RepID=I1K225_SOYBN
Glyma.20G006200	36.5283	3.23169	0.442173	3.76658e-14	6.05959e-13	UniRef100_K7N0L6 Uncharacterized protein n=1 Tax=Glycine max TaxID=3847 RepID=K7N0L6_SOYBN
Glyma.10G071000	91.6001	3.18468	0.26913	3.22805e-33	1.40467e-31	UniRef100_A0A445IJ75 Purple acid phosphatase n=1 Tax=Glycine soja TaxID=3848 RepID=A0A445IJ75_GLYSO
Glyma.08G076000	21.9622	3.14724	0.548646	1.14882e-09	1.25354e-08	UniRef100_I1KR67 Uncharacterized protein n=3 Tax=Soja TaxID=1462606 RepID=I1KR67_SOYBN
Glyma.15G214400	24.9369	3.11563	0.509728	1.09496e-10	1.33064e-09	UniRef100_UPI00071909E7 G-type lectin S-receptor-like serine/threonine-protein kinase At1g67520 isoform X2 n=1 Tax=Glycine max TaxID=3847 RepID=UPI00071909E7
Glyma.15G185700	7.2131	3.10116	1.05213	0.000325254	0.00156243	UniRef100_A0A0B2PAS2 Uncharacterized protein n=2 Tax=Soja TaxID=1462606 RepID=A0A0B2PAS2_GLYSO
Glyma.17G211300	284.011	3.0864	0.1638	4.38069e-80	6.5379e-78	UniRef100_K7MN35 Uncharacterized protein n=1 Tax=Glycine max TaxID=3847 RepID=K7MN35_SOYBN
Glyma.06G300100	260.977	3.06573	0.17984	2.66452e-66	2.9162e-64	UniRef100_I1KF82 Uncharacterized protein n=1 Tax=Glycine max TaxID=3847 RepID=I1KF82_SOYBN
Glyma.08G255200	45.0297	3.05958	0.386732	2.26242e-16	4.25583e-15	UniRef100_B9MSS5 CONSTANS protein n=2 Tax=Soja TaxID=1462606 RepID=B9MSS5_SOYBN
Glyma.08G087400	7.03257	3.04583	1.06153	0.000401059	0.0018957	UniRef100_I1KRI9 VQ domain-containing protein n=2 Tax=Glycine max TaxID=3847 RepID=I1KRI9_SOYBN
Glyma.13G209101	22.7182	3.03786	0.545608	2.32762e-09	2.46675e-08	UniRef100_A0A445I7R8 Adenylate isopentenyltransferase 5, chloroplastic n=3 Tax=Soja TaxID=1462606 RepID=A0A445I7R8_GLYSO
Glyma.05G245700	6.97978	3.03777	1.09692	0.000531264	0.00244834	UniRef100_K7KRF0 Uncharacterized protein n=2 Tax=Soja TaxID=1462606 RepID=K7KRF0_SOYBN
Glyma.04G084100	64.3394	3.0375	0.320612	2.49441e-22	6.57596e-21	UniRef100_I1JUV6 Uncharacterized protein n=1 Tax=Glycine max TaxID=3847 RepID=I1JUV6_SOYBN
Glyma.19G045800	16.391	3.02314	0.647764	2.73516e-07	2.25178e-06	UniRef100_I1N6P4 Rhomboid domain-containing protein n=2 Tax=Glycine max TaxID=3847 RepID=I1N6P4_SOYBN
Glyma.06G085800	368.596	3.02114	0.148284	1.08642e-93	2.10958e-91	UniRef100_K7KTY4 Uncharacterized protein n=4 Tax=Soja TaxID=1462606 RepID=K7KTY4_SOYBN
Glyma.10G150100	116.43	3.01174	0.243532	3.64425e-36	1.79074e-34	UniRef100_A0A445IMS6 PPM-type phosphatase domain-containing protein n=2 Tax=Soja TaxID=1462606 RepID=A0A445IMS6_GLYSO
Glyma.03G160300	16.0601	3.00014	0.657324	4.62293e-07	3.68173e-06	UniRef100_I1JP11 Uncharacterized protein n=1 Tax=Glycine max TaxID=3847 RepID=I1JP11_SOYBN
Glyma.11G082300	32.646	2.99139	0.458087	5.81432e-12	7.94235e-11	UniRef100_A0A088AWU8 Senescence-associated protein n=1 Tax=Glycine max TaxID=3847 RepID=A0A088AWU8_SOYBN
Glyma.05G103100	29.3329	2.97923	0.489176	1.02132e-10	1.24492e-09	UniRef100_A0A0B2SA00 Uncharacterized protein n=3 Tax=Soja TaxID=1462606 RepID=A0A0B2SA00_GLYSO
Glyma.07G077700	115.954	2.95564	0.23203	4.44136e-38	2.33491e-36	UniRef100_K7L0A3 Uncharacterized protein n=1 Tax=Glycine max TaxID=3847 RepID=K7L0A3_SOYBN
Glyma.17G066500	923.708	2.95168	0.0951079	3.32556e-212	3.53262e-209	UniRef100_I1MSU3 Transket_pyr domain-containing protein n=1 Tax=Glycine max TaxID=3847 RepID=I1MSU3_SOYBN
Glyma.09G053700	156.152	2.94557	0.199542	3.08107e-50	2.19919e-48	UniRef100_A0A445IX34 ANK_REP_REGION domain-containing protein n=3 Tax=Soja TaxID=1462606 RepID=A0A445IX34_GLYSO
Glyma.09G182400	21.132	2.93449	0.550142	9.29174e-09	9.18418e-08	UniRef100_A0A0B2SE07 Protein SAR DEFICIENT 1 n=2 Tax=Soja TaxID=1462606 RepID=A0A0B2SE07_GLYSO
Glyma.13G370100	1147.87	2.92916	0.090587	1.01552e-230	1.35843e-227	UniRef100_I1M5Y6 WRKY domain-containing protein n=1 Tax=Glycine max TaxID=3847 RepID=I1M5Y6_SOYBN
Glyma.07G242400	9.19991	2.92471	0.873843	8.41157e-05	0.000456775	UniRef100_I1KMT6 Epimerase domain-containing protein n=1 Tax=Glycine max TaxID=3847 RepID=I1KMT6_SOYBN
Glyma.20G033300	30.3973	2.91944	0.463179	2.17982e-11	2.82486e-10	UniRef100_A0A0B2QYE0 NAC domain-containing protein 29 n=2 Tax=Soja TaxID=1462606 RepID=A0A0B2QYE0_GLYSO
Glyma.08G284600	112.102	2.91737	0.236722	5.05195e-36	2.46903e-34	UniRef100_I1KXD1 F-box domain-containing protein n=2 Tax=Soja TaxID=1462606 RepID=I1KXD1_SOYBN
Glyma.12G235600	29.4617	2.91605	0.458487	1.98868e-11	2.58923e-10	UniRef100_A0A445HUE7 Protein CASPARIAN STRIP INTEGRITY FACTOR 1 isoform B n=1 Tax=Glycine soja TaxID=3848 RepID=A0A445HUE7_GLYSO
Glyma.17G156100	28.7588	2.90932	0.488157	2.8006e-10	3.27027e-09	UniRef100_K7MLV1 BHLH domain-containing protein n=1 Tax=Glycine max TaxID=3847 RepID=K7MLV1_SOYBN
Glyma.10G293500	76.7892	2.90182	0.284573	1.64109e-25	5.05198e-24	UniRef100_I1LFG4 TRANSKETOLASE_1 domain-containing protein n=2 Tax=Soja TaxID=1462606 RepID=I1LFG4_SOYBN
Glyma.09G222600	21.9593	2.89877	0.533092	5.47018e-09	5.5465e-08	UniRef100_K7LFD8 Amidophosphoribosyltransferase n=2 Tax=Soja TaxID=1462606 RepID=K7LFD8_SOYBN
Glyma.08G032800	209.413	2.88989	0.173403	2.18172e-63	2.23856e-61	UniRef100_I1KPW1 Uncharacterized protein n=2 Tax=Soja TaxID=1462606 RepID=I1KPW1_SOYBN
Glyma.14G195300	719.396	2.88758	0.104951	4.07659e-168	2.778e-165	UniRef100_K7M819 Protein kinase domain-containing protein n=1 Tax=Glycine max TaxID=3847 RepID=K7M819_SOYBN
Glyma.14G156300	31.5511	2.88466	0.445533	9.76994e-12	1.30932e-10	UniRef100_C6T243 Uncharacterized protein n=2 Tax=Soja TaxID=1462606 RepID=C6T243_SOYBN
Glyma.02G228300	1044.61	2.88377	0.0969164	1.08011e-195	9.07216e-193	UniRef100_K7KA73 Protein kinase domain-containing protein n=1 Tax=Glycine max TaxID=3847 RepID=K7KA73_SOYBN
Glyma.02G132500	104.89	2.88069	0.249555	9.8483e-32	4.08371e-30	UniRef100_I1JEU3 AP2/ERF domain-containing protein n=3 Tax=Soja TaxID=1462606 RepID=I1JEU3_SOYBN
Glyma.06G297900	7.95875	2.874	1.01249	0.000370681	0.00176365	UniRef100_I1KF62 Uncharacterized protein n=2 Tax=Soja TaxID=1462606 RepID=I1KF62_SOYBN
Glyma.20G221401	282.442	2.87016	0.167456	1.26671e-66	1.40768e-64	UniRef100_UPI000D0E828E ammonium transporter AMT1.6 n=1 Tax=Glycine max TaxID=3847 RepID=UPI000D0E828E
Glyma.13G234500	156.404	2.86668	0.214025	6.19303e-42	3.55602e-40	UniRef100_I1M1Y4 Glutaredoxin domain-containing protein n=1 Tax=Glycine max TaxID=3847 RepID=I1M1Y4_SOYBN
Glyma.15G228200	645.693	2.86212	0.214492	9.53804e-42	5.45072e-40	UniRef100_A0A0R0GG92 Uncharacterized protein n=1 Tax=Glycine max TaxID=3847 RepID=A0A0R0GG92_SOYBN
Glyma.05G155600	523.948	2.85933	0.117709	2.55009e-131	9.3981e-129	UniRef100_I1K3W1 Uncharacterized protein n=2 Tax=Soja TaxID=1462606 RepID=I1K3W1_SOYBN
Glyma.08G221300	6.35459	2.84493	1.09571	0.00083107	0.00364667	UniRef100_A0A445JIC8 F-box/kelch-repeat protein n=1 Tax=Glycine soja TaxID=3848 RepID=A0A445JIC8_GLYSO
Glyma.18G089800	7.8683	2.84398	0.974406	0.000291927	0.00141752	UniRef100_A0A0B2REV3 Indole-3-acetate O-methyltransferase 1 n=2 Tax=Soja TaxID=1462606 RepID=A0A0B2REV3_GLYSO
Glyma.02G100000	13.5357	2.84353	0.726562	7.26221e-06	4.82771e-05	UniRef100_I1JDX0 Protein kinase domain-containing protein n=1 Tax=Glycine max TaxID=3847 RepID=I1JDX0_SOYBN
Glyma.08G200100	2467.26	2.84059	0.0934614	5.25547e-204	4.86697e-201	UniRef100_P10743 Stem 31 kDa glycoprotein n=4 Tax=Soja TaxID=1462606 RepID=VSPB_SOYBN
Glyma.11G176500	130.614	2.83445	0.235505	1.13877e-34	5.23937e-33	UniRef100_A0A0R0HT22 Uncharacterized protein n=1 Tax=Glycine max TaxID=3847 RepID=A0A0R0HT22_SOYBN
Glyma.11G146200	18.0993	2.83019	0.621527	3.62698e-07	2.9299e-06	UniRef100_A0A0R0HH96 Uncharacterized protein n=2 Tax=Soja TaxID=1462606 RepID=A0A0R0HH96_SOYBN
Glyma.06G299000	372.841	2.82264	0.140425	7.97227e-91	1.45421e-88	UniRef100_C6T005 Uncharacterized protein n=1 Tax=Glycine max TaxID=3847 RepID=C6T005_SOYBN
Glyma.07G197100	5347.44	2.81635	0.0599708	0	0	UniRef100_A0A0B2PHS9 Uncharacterized protein n=2 Tax=Soja TaxID=1462606 RepID=A0A0B2PHS9_GLYSO
Glyma.06G139400	159.104	2.81457	0.199562	3.89964e-46	2.50166e-44	UniRef100_A0A0B2P3A0 Ubiquitin carboxyl-terminal hydrolase ZUFSP n=2 Tax=Soja TaxID=1462606 RepID=A0A0B2P3A0_GLYSO
Glyma.10G293600	37.6351	2.81174	0.418562	1.52555e-12	2.17436e-11	UniRef100_K7LM44 PMR5N domain-containing protein n=2 Tax=Glycine max TaxID=3847 RepID=K7LM44_SOYBN
Glyma.06G028200	318.268	2.80463	0.141977	8.36178e-88	1.43811e-85	UniRef100_K7KSQ8 Purple acid phosphatase n=3 Tax=Soja TaxID=1462606 RepID=K7KSQ8_SOYBN
Glyma.09G062600	77.2918	2.79329	0.277947	7.36525e-25	2.2039e-23	UniRef100_A0A0R0I8A1 Xyloglucan endotransglucosylase/hydrolase n=2 Tax=Soja TaxID=1462606 RepID=A0A0R0I8A1_SOYBN
Glyma.16G017500	124.512	2.79112	0.218933	2.84606e-38	1.5006e-36	UniRef100_I1MKB2 Fe2OG dioxygenase domain-containing protein n=2 Tax=Soja TaxID=1462606 RepID=I1MKB2_SOYBN
Glyma.04G044800	7.63122	2.78412	1.00726	0.000452209	0.00211587	UniRef100_A0A0R0K3S6 LOB domain-containing protein n=2 Tax=Soja TaxID=1462606 RepID=A0A0R0K3S6_SOYBN
Glyma.11G220900	240.336	2.77002	0.176596	2.16151e-56	1.8113e-54	UniRef100_A0A445HGY1 L-type lectin-domain containing receptor kinase S.4 n=1 Tax=Glycine soja TaxID=3848 RepID=A0A445HGY1_GLYSO
Glyma.18G020600	463.087	2.76956	0.121124	6.96739e-117	1.98143e-114	UniRef100_I1MYV8 Uncharacterized protein n=2 Tax=Soja TaxID=1462606 RepID=I1MYV8_SOYBN
Glyma.18G033302	7.51632	2.76783	0.976849	0.000381664	0.00181114	UniRef100_A0A445FNI9 Uncharacterized protein n=1 Tax=Glycine soja TaxID=3848 RepID=A0A445FNI9_GLYSO
Glyma.17G226500	1012	2.76328	0.0908618	4.28455e-204	4.07224e-201	UniRef100_I1MX85 Uncharacterized protein n=1 Tax=Glycine max TaxID=3847 RepID=I1MX85_SOYBN
Glyma.04G033500	13.384	2.75759	0.726546	1.00205e-05	6.50451e-05	UniRef100_K7KHW0 Uncharacterized protein n=2 Tax=Soja TaxID=1462606 RepID=K7KHW0_SOYBN
Glyma.19G199800	17.4472	2.7568	0.607016	5.50858e-07	4.34586e-06	UniRef100_K7MZB7 Uncharacterized protein n=2 Tax=Soja TaxID=1462606 RepID=K7MZB7_SOYBN
Glyma.12G203100	62.5218	2.7564	0.316121	3.09597e-19	6.93655e-18	UniRef100_I1LUF4 AP2/ERF domain-containing protein n=2 Tax=Glycine max TaxID=3847 RepID=I1LUF4_SOYBN
Glyma.13G239000	106.872	2.7491	0.242855	7.35636e-31	2.93904e-29	UniRef100_UPI0003DE7FAC lipoxygenase 3, chloroplastic isoform X1 n=1 Tax=Glycine max TaxID=3847 RepID=UPI0003DE7FAC
Glyma.12G212600	97.8819	2.7448	0.249841	2.9095e-29	1.07118e-27	UniRef100_A0A445HTD7 UDP-glycosyltransferase 79B30 n=1 Tax=Glycine soja TaxID=3848 RepID=A0A445HTD7_GLYSO
Glyma.13G088400	59.6471	2.73768	0.315995	4.71426e-19	1.04137e-17	UniRef100_I1LVZ4 TPR_REGION domain-containing protein n=1 Tax=Glycine max TaxID=3847 RepID=I1LVZ4_SOYBN
Glyma.10G274300	28.3956	2.73701	0.456323	1.60896e-10	1.92931e-09	UniRef100_I1LEW9 CONSTANS-like zinc finger protein n=1 Tax=Glycine max TaxID=3847 RepID=I1LEW9_SOYBN
Glyma.03G190100	7.32365	2.73331	1.00938	0.000552599	0.0025376	UniRef100_K7KFX8 Uncharacterized protein n=1 Tax=Glycine max TaxID=3847 RepID=K7KFX8_SOYBN
Glyma.10G067000	251.434	2.72413	0.165613	6.4988e-62	6.37818e-60	UniRef100_K7LHT2 AP2/ERF domain-containing protein n=2 Tax=Soja TaxID=1462606 RepID=K7LHT2_SOYBN
Glyma.19G232200	232.82	2.71132	0.172825	9.22832e-57	7.87942e-55	UniRef100_I1NBW1 Bidirectional sugar transporter SWEET n=2 Tax=Soja TaxID=1462606 RepID=I1NBW1_SOYBN
Glyma.10G151800	147.707	2.70862	0.202547	5.56445e-42	3.20018e-40	UniRef100_C6SWE6 TCTP domain-containing protein n=2 Tax=Soja TaxID=1462606 RepID=C6SWE6_SOYBN
Glyma.05G056600	432.683	2.70323	0.135941	2.72042e-89	4.84007e-87	UniRef100_I1K0L9 Uncharacterized protein n=1 Tax=Glycine max TaxID=3847 RepID=I1K0L9_SOYBN
Glyma.08G137400	39.2968	2.69013	0.397127	9.13524e-13	1.32932e-11	UniRef100_A0A0R0IRJ8 Uncharacterized protein n=1 Tax=Glycine max TaxID=3847 RepID=A0A0R0IRJ8_SOYBN
Glyma.11G073700	11.1507	2.68138	0.762659	3.40825e-05	0.000200678	UniRef100_A0A445HZ38 Floral homeotic protein DEFICIENS isoform B n=1 Tax=Glycine soja TaxID=3848 RepID=A0A445HZ38_GLYSO
Glyma.09G004900	7.43811	2.67731	1.00353	0.000546402	0.00251074	UniRef100_I1KZU0 Uncharacterized protein n=2 Tax=Soja TaxID=1462606 RepID=I1KZU0_SOYBN
Glyma.16G013000	799.393	2.67405	0.0957496	7.20157e-173	5.09998e-170	UniRef100_C6TM57 FLZ-type domain-containing protein n=2 Tax=Soja TaxID=1462606 RepID=C6TM57_SOYBN
Glyma.20G184300	140.302	2.66846	0.21937	2.69511e-35	1.27075e-33	UniRef100_I1NHJ5 BHLH domain-containing protein n=2 Tax=Soja TaxID=1462606 RepID=I1NHJ5_SOYBN
Glyma.01G051300	120.528	2.66566	0.515277	1.13461e-08	1.10933e-07	UniRef100_Q52QR5 NAC domain protein NAC1 n=2 Tax=Soja TaxID=1462606 RepID=Q52QR5_SOYBN
Glyma.07G212400	1366.75	2.66264	0.0865834	7.71738e-209	7.74246e-206	UniRef100_A0A0R0JAK2 AP2/ERF domain-containing protein n=3 Tax=Soja TaxID=1462606 RepID=A0A0R0JAK2_SOYBN
Glyma.17G161700	188.35	2.65486	0.370811	5.44569e-14	8.6606e-13	UniRef100_I1MVM5 N-acetyltransferase domain-containing protein n=2 Tax=Soja TaxID=1462606 RepID=I1MVM5_SOYBN
Glyma.06G323700	137.807	2.65244	0.205534	3.75047e-39	2.03693e-37	UniRef100_I1KFX9 Uncharacterized protein n=1 Tax=Glycine max TaxID=3847 RepID=I1KFX9_SOYBN
Glyma.09G102800	107.603	2.64782	0.228013	2.74694e-32	1.16445e-30	UniRef100_K7LCZ5 Protein DETOXIFICATION n=6 Tax=Soja TaxID=1462606 RepID=K7LCZ5_SOYBN
Glyma.15G104700	31.9164	2.64506	0.454592	5.90451e-10	6.65377e-09	UniRef100_I1MFE8 Peptidase A1 domain-containing protein n=1 Tax=Glycine max TaxID=3847 RepID=I1MFE8_SOYBN
Glyma.05G248000	8.31335	2.64421	0.926645	0.000334602	0.00160446	UniRef100_A0A0B2PRX1 Annexin D5 n=3 Tax=Soja TaxID=1462606 RepID=A0A0B2PRX1_GLYSO
Glyma.10G019800	118.451	2.64367	0.236726	4.3768e-30	1.66047e-28	UniRef100_C6T322 Uncharacterized protein n=1 Tax=Glycine max TaxID=3847 RepID=C6T322_SOYBN
Glyma.13G205100	16.7873	2.64221	0.607075	1.14478e-06	8.61738e-06	UniRef100_A0A445I7M4 Uncharacterized protein n=1 Tax=Glycine soja TaxID=3848 RepID=A0A445I7M4_GLYSO
Glyma.14G098200	2244.48	2.64143	0.0773286	7.42959e-257	1.57844e-253	UniRef100_C6SW05 Uncharacterized protein n=2 Tax=Soja TaxID=1462606 RepID=C6SW05_SOYBN
Glyma.10G282200	75.2167	2.63559	0.298593	1.0891e-19	2.50541e-18	UniRef100_I1LF51 FAD_binding_3 domain-containing protein n=2 Tax=Glycine max TaxID=3847 RepID=I1LF51_SOYBN
Glyma.10G255300	55.1013	2.6149	0.328824	1.50912e-16	2.86567e-15	UniRef100_I1LEC2 Aa_trans domain-containing protein n=3 Tax=Soja TaxID=1462606 RepID=I1LEC2_SOYBN
Glyma.09G184600	34.3365	2.60602	0.409746	1.76163e-11	2.30692e-10	UniRef100_K7M1Z5 Uncharacterized protein n=1 Tax=Glycine max TaxID=3847 RepID=K7M1Z5_SOYBN
Glyma.18G006500	13.1066	2.60336	0.731758	2.7778e-05	0.000166348	UniRef100_K7MP84 Uncharacterized protein n=2 Tax=Soja TaxID=1462606 RepID=K7MP84_SOYBN
Glyma.01G105000	102.68	2.60307	0.248187	7.2238e-27	2.36324e-25	UniRef100_I1J714 Uncharacterized protein n=2 Tax=Soja TaxID=1462606 RepID=I1J714_SOYBN
Glyma.20G193500	27.9395	2.60046	0.445783	5.22237e-10	5.92946e-09	UniRef100_K7N4H3 NB-ARC domain-containing protein n=1 Tax=Glycine max TaxID=3847 RepID=K7N4H3_SOYBN
Glyma.02G082500	225.305	2.58796	0.174271	4.17827e-51	3.04862e-49	UniRef100_I1JDF4 Uncharacterized protein n=1 Tax=Glycine max TaxID=3847 RepID=I1JDF4_SOYBN
Glyma.17G205300	7.9233	2.57649	0.942159	0.00048628	0.00225745	UniRef100_I1MWM9 Fe2OG dioxygenase domain-containing protein n=2 Tax=Soja TaxID=1462606 RepID=I1MWM9_SOYBN
Glyma.09G134900	68.0242	2.56274	0.297637	6.59393e-19	1.4416e-17	UniRef100_K7LDP5 CitMHS domain-containing protein n=2 Tax=Soja TaxID=1462606 RepID=K7LDP5_SOYBN
Glyma.06G235500	412.215	2.55845	0.125444	1.00554e-93	1.96309e-91	UniRef100_K7KWX5 Aminotran_1_2 domain-containing protein n=2 Tax=Soja TaxID=1462606 RepID=K7KWX5_SOYBN
Glyma.11G185700	6382.16	2.5507	0.0772524	3.58839e-240	5.891e-237	UniRef100_I1LKU2 Uncharacterized protein n=2 Tax=Soja TaxID=1462606 RepID=I1LKU2_SOYBN
Glyma.13G242100	53.66	2.54946	0.340875	5.44486e-15	9.36884e-14	UniRef100_I1M284 DUF3700 domain-containing protein n=2 Tax=Soja TaxID=1462606 RepID=I1M284_SOYBN
Glyma.08G036100	32.8897	2.54469	0.423839	1.74606e-10	2.08334e-09	UniRef100_A0A445J9F2 Protein SPEAR3 isoform B n=3 Tax=Soja TaxID=1462606 RepID=A0A445J9F2_GLYSO
Glyma.10G062200	465.374	2.54424	0.128632	4.46453e-88	7.71508e-86	UniRef100_A0A0B2RPL2 Glycosyltransferase n=2 Tax=Soja TaxID=1462606 RepID=A0A0B2RPL2_GLYSO
Glyma.05G136100	158.007	2.51739	0.188579	1.25649e-41	7.15786e-40	UniRef100_C6TF12 Glutamate decarboxylase n=2 Tax=Soja TaxID=1462606 RepID=C6TF12_SOYBN
Glyma.10G004800	230.422	2.51583	0.174015	3.14586e-48	2.18079e-46	UniRef100_I1L7F8 PHO1 n=1 Tax=Glycine max TaxID=3847 RepID=I1L7F8_SOYBN
Glyma.06G312600	83.5226	2.51463	0.252633	2.01923e-24	5.92916e-23	UniRef100_A0A445KGG9 Proline-rich receptor-like protein kinase PERK12 isoform N n=2 Tax=Glycine soja TaxID=3848 RepID=A0A445KGG9_GLYSO
Glyma.09G179700	6.90366	2.50981	1.04634	0.00107757	0.0045908	UniRef100_A0A0B2QVH9 Uncharacterized protein n=2 Tax=Soja TaxID=1462606 RepID=A0A0B2QVH9_GLYSO
Glyma.14G116400	115.622	2.50884	0.236655	2.95344e-27	9.90431e-26	UniRef100_I1M9J0 Uncharacterized protein n=2 Tax=Soja TaxID=1462606 RepID=I1M9J0_SOYBN
Glyma.13G301400	378.734	2.50816	0.134403	9.81966e-79	1.41297e-76	UniRef100_I1M3X2 Uncharacterized protein n=2 Tax=Soja TaxID=1462606 RepID=I1M3X2_SOYBN
Glyma.03G085500	48.906	2.50451	0.339061	1.39595e-14	2.33091e-13	UniRef100_A0A445L974 GTP cyclohydrolase 1 isoform A n=3 Tax=Soja TaxID=1462606 RepID=A0A445L974_GLYSO
Glyma.11G003500	619.761	2.49882	0.103586	1.12351e-129	4.09877e-127	UniRef100_I1LFR5 Tryptophan synthase n=4 Tax=Soja TaxID=1462606 RepID=I1LFR5_SOYBN
Glyma.09G145600	102.465	2.4975	0.227982	5.58113e-29	2.01775e-27	UniRef100_A0A0R0I8J7 LRRNT_2 domain-containing protein n=1 Tax=Glycine max TaxID=3847 RepID=A0A0R0I8J7_SOYBN
Glyma.08G160800	24.9089	2.48966	0.482701	2.38327e-08	2.24919e-07	UniRef100_A0A445JFF4 Uncharacterized protein n=3 Tax=Soja TaxID=1462606 RepID=A0A445JFF4_GLYSO
Glyma.10G092800	23.8769	2.48685	1.07267	0.000752036	0.00333759	UniRef100_I1L9V0 Fe2OG dioxygenase domain-containing protein n=1 Tax=Glycine max TaxID=3847 RepID=I1L9V0_SOYBN
Glyma.12G104200	226.224	2.48542	0.170572	2.01266e-49	1.40602e-47	UniRef100_C6TD53 Uncharacterized protein n=2 Tax=Soja TaxID=1462606 RepID=C6TD53_SOYBN
Glyma.11G014200	99.5341	2.485	0.238141	1.48656e-26	4.7895e-25	UniRef100_A0A445HVK2 Ethylene-responsive transcription factor ERF021 n=2 Tax=Soja TaxID=1462606 RepID=A0A445HVK2_GLYSO
Glyma.08G062800	11.2878	2.4774	0.751267	6.89305e-05	0.000380609	UniRef100_A0A0B2SL56 Inactive leucine-rich repeat receptor-like protein kinase isoform A n=4 Tax=Soja TaxID=1462606 RepID=A0A0B2SL56_GLYSO
Glyma.15G145600	138.8	2.47729	0.226014	4.91063e-29	1.78787e-27	UniRef100_A0A0B2PZV8 Disease resistance response protein DRRG49-C n=2 Tax=Soja TaxID=1462606 RepID=A0A0B2PZV8_GLYSO
Glyma.13G298400	33.4338	2.47091	0.4237	4.14131e-10	4.75888e-09	UniRef100_I1M3U3 AB hydrolase-1 domain-containing protein n=1 Tax=Glycine max TaxID=3847 RepID=I1M3U3_SOYBN
Glyma.17G251200	17.3761	2.46535	0.568341	1.21867e-06	9.12787e-06	UniRef100_I1MXW8 Uncharacterized protein n=2 Tax=Soja TaxID=1462606 RepID=I1MXW8_SOYBN
Glyma.13G290700	15.1061	2.46328	0.6263	7.01511e-06	4.67463e-05	UniRef100_A0A445IBM2 Phosphoenolpyruvate carboxylase 2 isoform A n=1 Tax=Glycine soja TaxID=3848 RepID=A0A445IBM2_GLYSO
Glyma.16G170000	31.9375	2.46104	0.409496	1.49016e-10	1.79102e-09	UniRef100_A0A0B2QWW6 Extensin-3 n=2 Tax=Soja TaxID=1462606 RepID=A0A0B2QWW6_GLYSO
Glyma.08G189300	26.0028	2.44747	0.458935	8.15263e-09	8.11153e-08	UniRef100_A0A445JGW0 Lipoxygenase n=2 Tax=Soja TaxID=1462606 RepID=A0A445JGW0_GLYSO
Glyma.20G159600	86.1746	2.44729	0.263086	1.27963e-21	3.24554e-20	UniRef100_A0A0R0EBT8 Uncharacterized protein n=1 Tax=Glycine max TaxID=3847 RepID=A0A0R0EBT8_SOYBN
Glyma.13G004400	586.442	2.44476	0.105678	2.56911e-119	7.66848e-117	UniRef100_A0A445H9S4 Zinc transporter 5 isoform A n=3 Tax=Soja TaxID=1462606 RepID=A0A445H9S4_GLYSO
Glyma.07G236700	123.346	2.44259	0.216788	1.54403e-30	6.03524e-29	UniRef100_K7L3I1 Uncharacterized protein n=2 Tax=Soja TaxID=1462606 RepID=K7L3I1_SOYBN
Glyma.15G132600	403.886	2.44226	0.142428	7.43331e-67	8.36352e-65	UniRef100_I1MG66 FAD-binding PCMH-type domain-containing protein n=2 Tax=Soja TaxID=1462606 RepID=I1MG66_SOYBN
Glyma.01G043300	12.7915	2.43259	0.67798	2.68e-05	0.000161316	UniRef100_I1J5L7 WRKY domain-containing protein n=2 Tax=Soja TaxID=1462606 RepID=I1J5L7_SOYBN
Glyma.06G298400	99.9409	2.42877	0.238534	2.34925e-25	7.17833e-24	UniRef100_K7KY72 Uncharacterized protein n=1 Tax=Glycine max TaxID=3847 RepID=K7KY72_SOYBN
Glyma.12G054300	376.15	2.42178	0.126997	3.13537e-82	4.77806e-80	UniRef100_UPI00103D84D8 cyanogenic beta-glucosidase-like isoform X1 n=2 Tax=Glycine soja TaxID=3848 RepID=UPI00103D84D8
Glyma.10G167700	15.7663	2.42066	0.649009	1.22643e-05	7.83568e-05	UniRef100_K7LJV3 Uncharacterized protein n=1 Tax=Glycine max TaxID=3847 RepID=K7LJV3_SOYBN
Glyma.15G229400	105.638	2.4173	0.22659	1.16848e-27	3.98508e-26	UniRef100_A0A0B2REB9 Protein LNK3 n=2 Tax=Soja TaxID=1462606 RepID=A0A0B2REB9_GLYSO
Glyma.17G203500	14.5186	2.40812	0.653181	1.89376e-05	0.000116898	UniRef100_I1MWL0 Uncharacterized protein n=1 Tax=Glycine max TaxID=3847 RepID=I1MWL0_SOYBN
Glyma.01G083300	55.6993	2.40306	0.328445	1.88841e-14	3.11149e-13	UniRef100_A0A0B2R0J4 Endonuclease 2 isoform A n=2 Tax=Soja TaxID=1462606 RepID=A0A0B2R0J4_GLYSO
Glyma.15G173650	9.71094	2.39789	0.813414	0.0002222	0.00110845	NA
Glyma.09G281900	246.293	2.39491	0.156198	4.76533e-54	3.77433e-52	UniRef100_I1L776 Uncharacterized protein n=1 Tax=Glycine max TaxID=3847 RepID=I1L776_SOYBN
Glyma.18G041400	54.4261	2.38553	0.313446	2.32078e-15	4.11283e-14	UniRef100_A0A445FP05 Aspartic proteinase PCS1 n=1 Tax=Glycine soja TaxID=3848 RepID=A0A445FP05_GLYSO
Glyma.06G298800	25.3624	2.38333	0.472169	3.50472e-08	3.24065e-07	UniRef100_I1KF70 Uncharacterized protein n=2 Tax=Soja TaxID=1462606 RepID=I1KF70_SOYBN
Glyma.06G297800	47.9868	2.38311	0.333405	7.67052e-14	1.21029e-12	UniRef100_A0A445KFZ9 Uncharacterized protein n=3 Tax=Soja TaxID=1462606 RepID=A0A445KFZ9_GLYSO
Glyma.11G208700	2149.78	2.3755	0.0723736	1.9108e-237	3.00053e-234	UniRef100_A0A445HGI9 Uncharacterized protein n=1 Tax=Glycine soja TaxID=3848 RepID=A0A445HGI9_GLYSO
Glyma.13G243500	209.627	2.37104	0.167072	6.88427e-47	4.52071e-45	UniRef100_I1M294 Carboxypeptidase n=3 Tax=Soja TaxID=1462606 RepID=I1M294_SOYBN
Glyma.20G245100	96.915	2.36891	0.270531	2.21521e-19	5.00667e-18	UniRef100_I1NJA2 Prenyltransferase 7 n=1 Tax=Glycine max TaxID=3847 RepID=I1NJA2_SOYBN
Glyma.06G150300	412.552	2.36404	0.12755	9.83863e-78	1.3935e-75	UniRef100_C6SXP5 Uncharacterized protein n=2 Tax=Soja TaxID=1462606 RepID=C6SXP5_SOYBN
Glyma.01G048700	40.573	2.35644	0.365463	8.85447e-12	1.19372e-10	UniRef100_I1J5R7 RING-type domain-containing protein n=1 Tax=Glycine max TaxID=3847 RepID=I1J5R7_SOYBN
Glyma.01G009000	11.4639	2.35638	0.707941	6.53071e-05	0.000362709	UniRef100_I1J4K4 Uncharacterized protein n=1 Tax=Glycine max TaxID=3847 RepID=I1J4K4_SOYBN
Glyma.16G020500	5921.87	2.34947	0.0762854	2.65304e-209	2.73771e-206	UniRef100_K7MER4 BHLH domain-containing protein n=1 Tax=Glycine max TaxID=3847 RepID=K7MER4_SOYBN
Glyma.18G184700	42.8642	2.34855	0.348826	1.4777e-12	2.11115e-11	UniRef100_A0A0B2PAK0 S-norcoclaurine synthase 1 n=2 Tax=Soja TaxID=1462606 RepID=A0A0B2PAK0_GLYSO
Glyma.18G169750	20.178	2.33019	0.57478	3.3252e-06	2.3406e-05	UniRef100_UPI00103BF2D6 uncharacterized protein LOC114394816 n=1 Tax=Glycine soja TaxID=3848 RepID=UPI00103BF2D6
Glyma.05G188900	7.36283	2.32388	0.962975	0.00101036	0.00433334	UniRef100_K7KR49 RING-type domain-containing protein n=3 Tax=Soja TaxID=1462606 RepID=K7KR49_SOYBN
Glyma.11G091400	19.8502	2.32243	0.536197	1.28774e-06	9.60338e-06	UniRef100_I1LIH1 HMA domain-containing protein n=2 Tax=Soja TaxID=1462606 RepID=I1LIH1_SOYBN
Glyma.13G063300	10.9967	2.32053	0.725298	0.0001081	0.000573985	UniRef100_K7LXH4 NAC domain-containing protein n=2 Tax=Soja TaxID=1462606 RepID=K7LXH4_SOYBN
Glyma.17G049900	283.749	2.31427	0.142303	1.45639e-60	1.38059e-58	UniRef100_I1MSB2 Oxidored_FMN domain-containing protein n=2 Tax=Soja TaxID=1462606 RepID=I1MSB2_SOYBN
Glyma.15G078600	809.022	2.31125	0.0987123	1.28532e-122	4.2589e-120	UniRef100_I1MEN6 Glutaredoxin domain-containing protein n=1 Tax=Glycine max TaxID=3847 RepID=I1MEN6_SOYBN
Glyma.12G182500	29.5409	2.30685	0.45172	2.4646e-08	2.32109e-07	UniRef100_UPI00103B89C0 uncharacterized protein LOC114379577 isoform X1 n=1 Tax=Glycine soja TaxID=3848 RepID=UPI00103B89C0
Glyma.19G042900	278.173	2.30652	0.140897	2.26932e-61	2.20325e-59	UniRef100_I1N6L0 Proline dehydrogenase n=2 Tax=Soja TaxID=1462606 RepID=I1N6L0_SOYBN
Glyma.06G248700	60.2058	2.30551	0.302491	2.04295e-15	3.63832e-14	UniRef100_I1KDZ9 TIR domain-containing protein n=3 Tax=Soja TaxID=1462606 RepID=I1KDZ9_SOYBN
Glyma.06G071200	12.0696	2.30353	0.683011	5.68874e-05	0.000320331	UniRef100_I1K8Y2 Uncharacterized protein n=1 Tax=Glycine max TaxID=3847 RepID=I1K8Y2_SOYBN
Glyma.01G133900	414.154	2.29596	0.130342	1.41011e-70	1.75617e-68	UniRef100_A0A0B2PS52 Cyclin n=2 Tax=Soja TaxID=1462606 RepID=A0A0B2PS52_GLYSO
Glyma.11G152333	474.187	2.29426	0.12038	2.98321e-82	4.56545e-80	UniRef100_A0A445I1R4 LOB domain-containing protein 1 n=1 Tax=Glycine soja TaxID=3848 RepID=A0A445I1R4_GLYSO
Glyma.05G079800	24.5176	2.29355	0.483642	1.52085e-07	1.30286e-06	UniRef100_A0A0B2QRN1 ABSCISIC ACID-INSENSITIVE 5-like protein 2 n=2 Tax=Soja TaxID=1462606 RepID=A0A0B2QRN1_GLYSO
Glyma.12G186200	12.0376	2.29291	0.718057	0.000102879	0.000549007	UniRef100_A0A0B2R106 NAC domain-containing protein 90 n=2 Tax=Soja TaxID=1462606 RepID=A0A0B2R106_GLYSO
Glyma.19G089800	20.8967	2.29048	0.507051	5.10934e-07	4.04414e-06	UniRef100_I1N7R1 Uncharacterized protein n=3 Tax=Soja TaxID=1462606 RepID=I1N7R1_SOYBN
Glyma.10G013800	11.0855	2.288	0.748413	0.000158932	0.00081696	UniRef100_A0A0B2R816 Uncharacterized protein n=2 Tax=Soja TaxID=1462606 RepID=A0A0B2R816_GLYSO
Glyma.19G222451	52.6625	2.27314	0.316857	6.63352e-14	1.05172e-12	NA
Glyma.07G091400	10.7977	2.26618	0.74943	0.000184491	0.000933752	UniRef100_A0A445JUG0 Zinc finger protein CONSTANS-LIKE 16 isoform A n=2 Tax=Soja TaxID=1462606 RepID=A0A445JUG0_GLYSO
Glyma.20G159700	62.9475	2.26122	0.306558	1.27585e-14	2.14126e-13	UniRef100_I1NGU4 Uncharacterized protein n=1 Tax=Glycine max TaxID=3847 RepID=I1NGU4_SOYBN
Glyma.04G190300	103.843	2.25977	0.224705	7.69411e-25	2.2947e-23	UniRef100_E2FKH3 Sieve element occlusion c n=3 Tax=Soja TaxID=1462606 RepID=E2FKH3_SOYBN
Glyma.14G106200	26.7112	2.24877	0.451428	5.66341e-08	5.11236e-07	UniRef100_A0A0R0GBL5 AP2/ERF domain-containing protein n=3 Tax=Soja TaxID=1462606 RepID=A0A0R0GBL5_SOYBN
Glyma.15G154600	8.89178	2.24718	0.859997	0.000606523	0.00275857	UniRef100_A0A0R0GAG4 Uncharacterized protein n=3 Tax=Soja TaxID=1462606 RepID=A0A0R0GAG4_SOYBN
Glyma.02G154500	8.11889	2.24516	0.94696	0.00108371	0.00461451	UniRef100_A0A0B2SPT8 Uncharacterized protein n=2 Tax=Soja TaxID=1462606 RepID=A0A0B2SPT8_GLYSO
Glyma.01G135800	16.4675	2.24203	0.567708	6.28723e-06	4.22388e-05	UniRef100_A0A0B2QXD1 Uncharacterized protein n=2 Tax=Soja TaxID=1462606 RepID=A0A0B2QXD1_GLYSO
Glyma.14G099200	131.979	2.23946	0.205897	9.23034e-29	3.29419e-27	UniRef100_I1M958 PABS domain-containing protein n=3 Tax=Soja TaxID=1462606 RepID=I1M958_SOYBN
Glyma.02G213700	37.4063	2.23912	0.397276	1.28153e-09	1.39329e-08	UniRef100_I1JGZ6 Carbonic anhydrase n=2 Tax=Soja TaxID=1462606 RepID=I1JGZ6_SOYBN
Glyma.03G003300	45.6245	2.23151	0.335133	2.5572e-12	3.59791e-11	UniRef100_I1JK13 Receptor-like serine/threonine-protein kinase n=1 Tax=Glycine max TaxID=3847 RepID=I1JK13_SOYBN
Glyma.11G169901	292.734	2.22363	0.141728	1.21898e-56	1.03105e-54	UniRef100_A0A0B2PCH9 Protein kinase byr2 n=1 Tax=Glycine soja TaxID=3848 RepID=A0A0B2PCH9_GLYSO
Glyma.05G025900	194.29	2.22303	0.16725	2.46553e-41	1.39354e-39	UniRef100_I1JZN7 Dof-type domain-containing protein n=2 Tax=Soja TaxID=1462606 RepID=I1JZN7_SOYBN
Glyma.11G123000	38.7777	2.21534	0.36183	8.18662e-11	1.00536e-09	UniRef100_A0A445I103 Protein JINGUBANG isoform B n=1 Tax=Glycine soja TaxID=3848 RepID=A0A445I103_GLYSO
Glyma.04G243000	20.8066	2.21529	0.499204	7.73835e-07	5.98728e-06	UniRef100_I1JYZ2 E1_dh domain-containing protein n=1 Tax=Glycine max TaxID=3847 RepID=I1JYZ2_SOYBN
Glyma.13G238500	205.006	2.21123	0.174392	4.71881e-38	2.47717e-36	UniRef100_A0A0R4J4Y9 Uncharacterized protein n=1 Tax=Glycine max TaxID=3847 RepID=A0A0R4J4Y9_SOYBN
Glyma.19G188000	739.44	2.21113	0.107828	1.30911e-94	2.62672e-92	UniRef100_A0A0R0EPF4 Uncharacterized protein n=2 Tax=Soja TaxID=1462606 RepID=A0A0R0EPF4_SOYBN
Glyma.17G061000	13.059	2.20837	0.677562	7.26089e-05	0.000399332	UniRef100_I1MSN6 Uncharacterized protein n=1 Tax=Glycine max TaxID=3847 RepID=I1MSN6_SOYBN
Glyma.13G262100	40.9305	2.20826	0.356242	4.70187e-11	5.93975e-10	UniRef100_I1M2T5 Uncharacterized protein n=1 Tax=Glycine max TaxID=3847 RepID=I1M2T5_SOYBN
Glyma.01G183700	10.9721	2.20666	0.752463	0.000218508	0.00109184	UniRef100_I1J945 HTH myb-type domain-containing protein n=1 Tax=Glycine max TaxID=3847 RepID=I1J945_SOYBN
Glyma.11G197300	944.297	2.20526	0.0888654	4.53723e-137	1.95085e-134	UniRef100_I1LLX9 Uncharacterized protein n=1 Tax=Glycine max TaxID=3847 RepID=I1LLX9_SOYBN
Glyma.07G181600	14.2921	2.20391	0.621754	3.02527e-05	0.00017968	UniRef100_A0A0R0JCG7 Uncharacterized protein n=2 Tax=Soja TaxID=1462606 RepID=A0A0R0JCG7_SOYBN
Glyma.05G020400	270.237	2.20368	0.153849	1.54729e-47	1.0465e-45	UniRef100_K7KME4 Jas domain-containing protein n=2 Tax=Soja TaxID=1462606 RepID=K7KME4_SOYBN
Glyma.10G053200	81.4491	2.20134	0.253499	3.56406e-19	7.96062e-18	UniRef100_I1L8V9 Uncharacterized protein n=2 Tax=Soja TaxID=1462606 RepID=I1L8V9_SOYBN
Glyma.12G217700	55.2146	2.19852	0.303455	3.92955e-14	6.31051e-13	UniRef100_I1LUU8 EF-hand domain-containing protein n=2 Tax=Soja TaxID=1462606 RepID=I1LUU8_SOYBN
Glyma.07G215600	28.0473	2.19818	0.430871	2.95065e-08	2.75229e-07	UniRef100_K7L332 Polysacc_synt_4 domain-containing protein n=2 Tax=Soja TaxID=1462606 RepID=K7L332_SOYBN
Glyma.02G288500	72.5638	2.1907	0.28436	1.34609e-15	2.42356e-14	UniRef100_I1JJ62 Citrate synthase n=2 Tax=Soja TaxID=1462606 RepID=I1JJ62_SOYBN
Glyma.12G051800	82.9465	2.18852	0.255292	7.89904e-19	1.71861e-17	UniRef100_K7LT57 PfkB domain-containing protein n=1 Tax=Glycine max TaxID=3847 RepID=K7LT57_SOYBN
Glyma.08G125900	96.7052	2.18773	0.233561	5.98598e-22	1.54646e-20	UniRef100_K7L6A0 Uncharacterized protein n=2 Tax=Soja TaxID=1462606 RepID=K7L6A0_SOYBN
Glyma.16G168400	379.08	2.18327	0.120365	1.33781e-74	1.78954e-72	UniRef100_K7MHS5 BZIP domain-containing protein n=1 Tax=Glycine max TaxID=3847 RepID=K7MHS5_SOYBN
Glyma.04G112800	12.4449	2.18243	0.664074	7.38374e-05	0.000405102	UniRef100_A0A0B2P1Y2 Photosystem I reaction center subunit V, chloroplastic n=3 Tax=Soja TaxID=1462606 RepID=A0A0B2P1Y2_GLYSO
Glyma.08G164400	134.504	2.17731	0.204892	2.44487e-27	8.22172e-26	UniRef100_I1KTX1 Uncharacterized protein n=3 Tax=Soja TaxID=1462606 RepID=I1KTX1_SOYBN
Glyma.16G043400	16.7511	2.17394	0.561367	8.68768e-06	5.70496e-05	UniRef100_A0A368UK88 Uncharacterized protein n=1 Tax=Glycine max TaxID=3847 RepID=A0A368UK88_SOYBN
Glyma.12G104800	577.929	2.17231	0.128225	1.36149e-65	1.46348e-63	UniRef100_I1LRW1 Uncharacterized protein n=3 Tax=Soja TaxID=1462606 RepID=I1LRW1_SOYBN
Glyma.12G129200	18.6525	2.17224	0.537095	4.19439e-06	2.89986e-05	UniRef100_A0A445HPA1 Phospholipase A1-IIdelta n=2 Tax=Soja TaxID=1462606 RepID=A0A445HPA1_GLYSO
Glyma.04G209700	37.8131	2.17174	0.383732	1.14505e-09	1.25017e-08	UniRef100_K7KLE8 Uncharacterized protein n=2 Tax=Soja TaxID=1462606 RepID=K7KLE8_SOYBN
Glyma.08G125800	7.26006	2.16827	1.05335	0.00205617	0.0081277	UniRef100_K7L698 Receptor-like serine/threonine-protein kinase n=5 Tax=Soja TaxID=1462606 RepID=K7L698_SOYBN
Glyma.18G241700	72.0388	2.16483	0.269331	8.99159e-17	1.73477e-15	UniRef100_C6T1C8 PsaL domain-containing protein n=2 Tax=Soja TaxID=1462606 RepID=C6T1C8_SOYBN
Glyma.14G199600	20.6997	2.1639	0.514742	2.0074e-06	1.4579e-05	UniRef100_A0A0R0GS25 Exocyst subunit Exo70 family protein n=1 Tax=Glycine max TaxID=3847 RepID=A0A0R0GS25_SOYBN
Glyma.13G093800	1253.78	2.16309	0.0847028	4.40889e-145	2.09521e-142	UniRef100_D0EP05 CONSTANS-like zinc finger protein n=1 Tax=Glycine max TaxID=3847 RepID=D0EP05_SOYBN
Glyma.13G315300	8.1114	2.16184	0.930017	0.00113579	0.00481131	UniRef100_UPI00023CF9FD NAC domain-containing protein 90 isoform X1 n=1 Tax=Glycine max TaxID=3847 RepID=UPI00023CF9FD
Glyma.08G240400	380.424	2.15543	0.132145	6.50354e-61	6.23046e-59	UniRef100_K7L8I8 Protein kinase domain-containing protein n=1 Tax=Glycine max TaxID=3847 RepID=K7L8I8_SOYBN
Glyma.10G277800	2182.02	2.15212	0.0821617	3.19722e-152	1.74961e-149	UniRef100_Q8S900 Syringolide-induced protein 1-3-1A n=1 Tax=Glycine max TaxID=3847 RepID=Q8S900_SOYBN
Glyma.12G112000	439.56	2.14712	0.114279	9.89286e-80	1.44656e-77	UniRef100_C6TC62 RING-type domain-containing protein n=2 Tax=Soja TaxID=1462606 RepID=C6TC62_SOYBN
Glyma.17G066600	1019.54	2.14134	0.0955758	3.07214e-112	8.28033e-110	UniRef100_D0EP03 CONSTANS-like zinc finger protein n=2 Tax=Soja TaxID=1462606 RepID=D0EP03_SOYBN
Glyma.14G096600	97.6091	2.14031	0.230439	1.49636e-21	3.78459e-20	UniRef100_A0A445H426 Beta-fructofuranosidase, insoluble isoenzyme CWINV1 isoform A n=3 Tax=Soja TaxID=1462606 RepID=A0A445H426_GLYSO
Glyma.12G105400	8.3683	2.1356	0.910763	0.00122973	0.00516914	UniRef100_I1LRW2 Uncharacterized protein n=1 Tax=Glycine max TaxID=3847 RepID=I1LRW2_SOYBN
Glyma.03G202200	7.40007	2.13556	0.950515	0.00161064	0.00654935	UniRef100_A0A0B2RIS9 Aluminum-activated malate transporter 8 n=2 Tax=Soja TaxID=1462606 RepID=A0A0B2RIS9_GLYSO
Glyma.02G037500	480.122	2.13537	0.112366	1.45326e-81	2.20535e-79	UniRef100_C6TBW3 Uncharacterized protein n=1 Tax=Glycine max TaxID=3847 RepID=C6TBW3_SOYBN
Glyma.17G145900	3424.4	2.13333	0.080868	2.04635e-154	1.19207e-151	UniRef100_I1MV59 Lipase_3 domain-containing protein n=2 Tax=Soja TaxID=1462606 RepID=I1MV59_SOYBN
Glyma.19G042500	187.276	2.13044	0.189482	1.89795e-30	7.3708e-29	UniRef100_I1N6L3 Uncharacterized protein n=2 Tax=Soja TaxID=1462606 RepID=I1N6L3_SOYBN
Glyma.17G217000	92.7221	2.12579	0.230077	2.24631e-21	5.61842e-20	UniRef100_I1MWY7 Glyco_18 domain-containing protein n=1 Tax=Glycine max TaxID=3847 RepID=I1MWY7_SOYBN
Glyma.03G172900	13.0161	2.12538	0.654649	8.41318e-05	0.000456793	UniRef100_I1JPE1 WAT1-related protein n=2 Tax=Soja TaxID=1462606 RepID=I1JPE1_SOYBN
Glyma.13G334600	194.395	2.12535	0.167304	5.51608e-38	2.88731e-36	UniRef100_A0A445IDU4 Uncharacterized protein n=2 Tax=Soja TaxID=1462606 RepID=A0A445IDU4_GLYSO
Glyma.13G259400	747.472	2.12491	0.092074	5.85427e-119	1.7331e-116	UniRef100_A0A0B2STA0 Gibberellin 2-beta-dioxygenase 1 n=2 Tax=Soja TaxID=1462606 RepID=A0A0B2STA0_GLYSO
Glyma.13G282000	23.5742	2.12477	0.483718	9.10539e-07	6.97475e-06	UniRef100_C6T868 Chlorophyll a-b binding protein, chloroplastic n=2 Tax=Soja TaxID=1462606 RepID=C6T868_SOYBN
Glyma.10G025300	37.6353	2.11978	0.361972	4.25154e-10	4.87625e-09	UniRef100_I1L825 Uncharacterized protein n=1 Tax=Glycine max TaxID=3847 RepID=I1L825_SOYBN
Glyma.13G289200	146.489	2.11081	0.209937	8.28225e-25	2.46807e-23	UniRef100_A0A445IBK8 UDP-glycosyltransferase 79B30 n=1 Tax=Glycine soja TaxID=3848 RepID=A0A445IBK8_GLYSO
Glyma.12G043500	1101.2	2.10556	0.0930366	1.94878e-114	5.45613e-112	UniRef100_I1LQ41 Uncharacterized protein n=1 Tax=Glycine max TaxID=3847 RepID=I1LQ41_SOYBN
Glyma.01G207900	34.3473	2.10528	0.407381	2.12875e-08	2.01849e-07	UniRef100_A0A0R0LEJ2 Uncharacterized protein n=1 Tax=Glycine max TaxID=3847 RepID=A0A0R0LEJ2_SOYBN
Glyma.05G063100	114.966	2.10518	0.208036	3.51731e-25	1.06662e-23	UniRef100_A0A0B2SIE2 Nudix hydrolase 8 n=1 Tax=Glycine soja TaxID=3848 RepID=A0A0B2SIE2_GLYSO
Glyma.18G061100	10780.8	2.10235	0.0788078	6.31458e-158	3.86549e-155	UniRef100_A0A445FPT2 Asparagine synthetase [glutamine-hydrolyzing] n=2 Tax=Soja TaxID=1462606 RepID=A0A445FPT2_GLYSO
Glyma.12G075400	4795.55	2.10207	0.0588296	8.95181e-281	2.69427e-277	UniRef100_C6TDZ1 Uncharacterized protein n=1 Tax=Glycine max TaxID=3847 RepID=C6TDZ1_SOYBN
Glyma.13G047300	946.76	2.09375	0.0847247	5.4935e-136	2.30708e-133	UniRef100_A0A0B2SRY7 Allene oxide cyclase 3, chloroplastic n=2 Tax=Soja TaxID=1462606 RepID=A0A0B2SRY7_GLYSO
Glyma.01G177900	218.115	2.08742	0.182773	2.69757e-31	1.10088e-29	UniRef100_I1J8Y3 Glycosyltransferase n=1 Tax=Glycine max TaxID=3847 RepID=I1J8Y3_SOYBN
Glyma.06G310700	1085.01	2.08558	0.0857096	6.62433e-132	2.4922e-129	UniRef100_A0A0B2QXK4 WAT1-related protein n=2 Tax=Soja TaxID=1462606 RepID=A0A0B2QXK4_GLYSO
Glyma.12G235300	124.594	2.08489	0.215223	3.49529e-23	9.70326e-22	UniRef100_A0A0B2QGW2 Protein SRG1 n=2 Tax=Soja TaxID=1462606 RepID=A0A0B2QGW2_GLYSO
Glyma.17G245500	296.598	2.08308	0.148934	1.21651e-45	7.72174e-44	UniRef100_I1MXS1 RPW8 domain-containing protein n=2 Tax=Soja TaxID=1462606 RepID=I1MXS1_SOYBN
Glyma.03G230800	13.8003	2.08176	0.632377	6.97382e-05	0.000384657	UniRef100_I1JR46 Uncharacterized protein n=1 Tax=Glycine max TaxID=3847 RepID=I1JR46_SOYBN
Glyma.06G078100	89.4584	2.07212	0.234331	7.14821e-20	1.65707e-18	UniRef100_K7KTR5 Uncharacterized protein n=4 Tax=Soja TaxID=1462606 RepID=K7KTR5_SOYBN
Glyma.11G060100	8.36763	2.0644	0.846901	0.000933166	0.00403534	UniRef100_I1LHI8 Uncharacterized protein n=2 Tax=Soja TaxID=1462606 RepID=I1LHI8_SOYBN
Glyma.06G050100	86.5766	2.06258	0.257086	9.58119e-17	1.84557e-15	UniRef100_K7KT64 Branched-chain-amino-acid aminotransferase n=6 Tax=Soja TaxID=1462606 RepID=K7KT64_SOYBN
Glyma.07G051400	36.1313	2.05953	0.389941	1.03211e-08	1.01378e-07	UniRef100_I1KHR6 Uncharacterized protein n=2 Tax=Soja TaxID=1462606 RepID=I1KHR6_SOYBN
Glyma.15G262600	140.895	2.05585	0.186473	2.70934e-29	9.99523e-28	UniRef100_I1MJD4 Uncharacterized protein n=2 Tax=Soja TaxID=1462606 RepID=I1MJD4_SOYBN
Glyma.14G206200	150.971	2.05519	0.186996	4.033e-29	1.47131e-27	UniRef100_I1MBM1 Protein kinase domain-containing protein n=3 Tax=Soja TaxID=1462606 RepID=I1MBM1_SOYBN
Glyma.11G034400	60.7016	2.0518	0.283065	3.71411e-14	5.9805e-13	UniRef100_A0A445HWK0 VAN3-binding protein isoform A n=3 Tax=Soja TaxID=1462606 RepID=A0A445HWK0_GLYSO
Glyma.03G021200	2448.24	2.05056	0.0830881	1.56013e-135	6.47669e-133	UniRef100_A0A0B2P471 Cytochrome P450 76C4 n=2 Tax=Soja TaxID=1462606 RepID=A0A0B2P471_GLYSO
Glyma.10G272300	336.581	2.0444	0.134308	2.47577e-53	1.92296e-51	UniRef100_I1LEU7 C2H2-type domain-containing protein n=2 Tax=Soja TaxID=1462606 RepID=I1LEU7_SOYBN
Glyma.04G055300	25.281	2.04418	0.453168	5.26096e-07	4.15595e-06	UniRef100_I1JU06 Uncharacterized protein n=1 Tax=Glycine max TaxID=3847 RepID=I1JU06_SOYBN
Glyma.16G011400	53.843	2.04199	0.306049	2.36918e-12	3.34249e-11	UniRef100_A0A445GCN6 Dormancy-associated protein-like 4 isoform A n=2 Tax=Soja TaxID=1462606 RepID=A0A445GCN6_GLYSO
Glyma.16G214900	13.1815	2.04102	0.640977	0.000108256	0.000574727	UniRef100_A0A0R0FTD8 TIR domain-containing protein n=1 Tax=Glycine max TaxID=3847 RepID=A0A0R0FTD8_SOYBN
Glyma.19G227800	22.1369	2.0392	0.47762	1.49309e-06	1.10278e-05	UniRef100_I1NBQ6 Hexosyltransferase n=2 Tax=Soja TaxID=1462606 RepID=I1NBQ6_SOYBN
Glyma.02G156800	729.891	2.03664	0.111753	3.2756e-75	4.43089e-73	UniRef100_I1JFJ9 Lectin_legB domain-containing protein n=4 Tax=Soja TaxID=1462606 RepID=I1JFJ9_SOYBN
Glyma.09G082800	332.218	2.03579	0.169017	1.39569e-34	6.39699e-33	UniRef100_A0A0R0I5M7 Uncharacterized protein n=1 Tax=Glycine max TaxID=3847 RepID=A0A0R0I5M7_SOYBN
Glyma.07G051500	2743.39	2.02902	0.0830912	9.26862e-133	3.63864e-130	UniRef100_I1KHR7 BHLH transcription factor n=2 Tax=Soja TaxID=1462606 RepID=I1KHR7_SOYBN
Glyma.12G048100	46.1046	2.02807	0.339446	2.02934e-10	2.40544e-09	UniRef100_I1LQ91 Uncharacterized protein n=1 Tax=Glycine max TaxID=3847 RepID=I1LQ91_SOYBN
Glyma.01G042100	21.6472	2.02681	0.49811	3.2676e-06	2.305e-05	UniRef100_I1J5K4 Uncharacterized protein n=1 Tax=Glycine max TaxID=3847 RepID=I1J5K4_SOYBN
Glyma.14G089066	234.574	2.02627	0.160008	9.2658e-38	4.82209e-36	UniRef100_I1M8V4 BZIP domain-containing protein n=2 Tax=Soja TaxID=1462606 RepID=I1M8V4_SOYBN
Glyma.09G027700	12.2466	2.02616	0.771048	0.000499414	0.00231248	UniRef100_A0A0R0ICR4 Protein kinase domain-containing protein n=1 Tax=Glycine max TaxID=3847 RepID=A0A0R0ICR4_SOYBN
Glyma.11G077800	100.764	2.02292	0.24732	2.05344e-17	4.10427e-16	UniRef100_I1LI22 Uncharacterized protein n=2 Tax=Soja TaxID=1462606 RepID=I1LI22_SOYBN
Glyma.03G008800	9.80826	2.0178	0.770837	0.000589394	0.00268777	UniRef100_K7KC17 Uncharacterized protein n=2 Tax=Glycine max TaxID=3847 RepID=K7KC17_SOYBN
Glyma.02G082700	17.0935	2.01754	0.562104	2.64049e-05	0.000159077	UniRef100_UPI000233748C tryptophan aminotransferase-related protein 3 n=1 Tax=Glycine max TaxID=3847 RepID=UPI000233748C
Glyma.04G228700	1931.18	2.01581	0.0857757	2.81766e-123	9.5108e-121	UniRef100_I1JYI4 START domain-containing protein n=2 Tax=Soja TaxID=1462606 RepID=I1JYI4_SOYBN
Glyma.11G146500	340.617	2.01465	0.134672	1.03373e-51	7.68213e-50	UniRef100_A0A0R0HUK1 Uncharacterized protein n=2 Tax=Soja TaxID=1462606 RepID=A0A0R0HUK1_SOYBN
Glyma.16G016100	22.2772	2.01007	0.484253	2.67564e-06	1.90378e-05	UniRef100_C6TKB2 Chlorophyll a-b binding protein, chloroplastic n=2 Tax=Soja TaxID=1462606 RepID=C6TKB2_SOYBN
Glyma.02G029900	12.255	2.00708	0.695689	0.000272063	0.00133037	UniRef100_A0A445LIT7 Glycosyltransferase n=2 Tax=Glycine soja TaxID=3848 RepID=A0A445LIT7_GLYSO
Glyma.13G092500	479.404	2.00434	0.110825	4.02887e-74	5.33007e-72	UniRef100_A0A0R0GKM3 Glyco_transf_20 domain-containing protein n=3 Tax=Soja TaxID=1462606 RepID=A0A0R0GKM3_SOYBN
Glyma.18G198000	23.4669	2.00218	0.465498	1.29164e-06	9.6305e-06	UniRef100_K7MTF4 Protein kinase domain-containing protein n=1 Tax=Glycine max TaxID=3847 RepID=K7MTF4_SOYBN
Glyma.09G203200	124.841	2.00141	0.207653	4.30412e-23	1.18938e-21	UniRef100_I1L4V8 Uncharacterized protein n=2 Tax=Soja TaxID=1462606 RepID=I1L4V8_SOYBN
Glyma.07G253600	180.235	2.00116	0.166545	2.75377e-34	1.24947e-32	UniRef100_K7L3S9 Uncharacterized protein n=2 Tax=Soja TaxID=1462606 RepID=K7L3S9_SOYBN
Glyma.08G355900	23.9141	1.99895	0.461475	1.19271e-06	8.94647e-06	UniRef100_A0A0B2PHK4 Protein SULFUR DEFICIENCY-INDUCED 1 n=2 Tax=Soja TaxID=1462606 RepID=A0A0B2PHK4_GLYSO
Glyma.05G143200	71.9286	1.99649	0.282081	1.11086e-13	1.73759e-12	UniRef100_I1K3H3 Uncharacterized protein n=1 Tax=Glycine max TaxID=3847 RepID=I1K3H3_SOYBN
Glyma.12G149100	589.669	1.99644	0.104087	4.75931e-83	7.40914e-81	UniRef100_A0A0B2SWZ2 NAC domain-containing protein 72 n=2 Tax=Soja TaxID=1462606 RepID=A0A0B2SWZ2_GLYSO
Glyma.03G261600	16.3941	1.99429	0.58332	4.65248e-05	0.000266847	UniRef100_A0A0R0KVX2 Fe2OG dioxygenase domain-containing protein n=1 Tax=Glycine max TaxID=3847 RepID=A0A0R0KVX2_SOYBN
Glyma.10G145300	61.3461	1.99404	0.286091	2.50245e-13	3.78998e-12	UniRef100_I1LB22 Hexosyltransferase n=2 Tax=Soja TaxID=1462606 RepID=I1LB22_SOYBN
Glyma.15G238400	570.881	1.99106	0.11811	1.09078e-64	1.1553e-62	UniRef100_D6QX28 Annexin 11 n=2 Tax=Soja TaxID=1462606 RepID=D6QX28_SOYBN
Glyma.08G033700	16.5165	1.98698	0.57332	3.83205e-05	0.00022343	UniRef100_A0A445J9M5 Senescence/dehydration-associated protein, chloroplastic isoform A n=2 Tax=Soja TaxID=1462606 RepID=A0A445J9M5_GLYSO
Glyma.13G161100	44.1671	1.98652	0.34242	4.73343e-10	5.40149e-09	UniRef100_I1LZR9 Exostosin domain-containing protein n=1 Tax=Glycine max TaxID=3847 RepID=I1LZR9_SOYBN
Glyma.11G238400	352.451	1.98506	0.135675	1.42416e-49	9.98764e-48	UniRef100_I1LN03 STAS domain-containing protein n=1 Tax=Glycine max TaxID=3847 RepID=I1LN03_SOYBN
Glyma.12G132200	247.175	1.98301	0.144622	7.51482e-44	4.59243e-42	UniRef100_K7LUI7 TIR domain-containing protein n=3 Tax=Soja TaxID=1462606 RepID=K7LUI7_SOYBN
Glyma.10G239400	17.606	1.98238	0.57132	4.07745e-05	0.000236457	UniRef100_B3TPN4 CRT binding factor 2 n=2 Tax=Soja TaxID=1462606 RepID=B3TPN4_SOYBN
Glyma.08G215200	109.697	1.98049	0.210125	3.91238e-22	1.02024e-20	UniRef100_K7L7Z8 Uncharacterized protein n=1 Tax=Glycine max TaxID=3847 RepID=K7L7Z8_SOYBN
Glyma.20G184900	215.05	1.9792	0.159331	1.37257e-36	6.90435e-35	UniRef100_I1NHK4 ABC transporter domain-containing protein n=2 Tax=Glycine max TaxID=3847 RepID=I1NHK4_SOYBN
Glyma.17G112051	10.4199	1.97738	0.730296	0.000465123	0.00217151	UniRef100_A0A445G5C9 Uncharacterized protein n=1 Tax=Glycine soja TaxID=3848 RepID=A0A445G5C9_GLYSO
Glyma.09G014700	281.122	1.9767	0.141315	1.5969e-45	1.01007e-43	UniRef100_A0A445IVE6 Protein C2-DOMAIN ABA-RELATED 11 isoform A n=2 Tax=Soja TaxID=1462606 RepID=A0A445IVE6_GLYSO
Glyma.18G296900	26.6135	1.97202	0.448136	8.06313e-07	6.22107e-06	UniRef100_A0A0R0F5X7 Ribulose bisphosphate carboxylase small chain n=1 Tax=Glycine max TaxID=3847 RepID=A0A0R0F5X7_SOYBN
Glyma.15G186100	3515.07	1.96974	0.0687286	6.57988e-182	5.16621e-179	UniRef100_A0A0B2PAF2 Guanine deaminase n=2 Tax=Soja TaxID=1462606 RepID=A0A0B2PAF2_GLYSO
Glyma.07G163200	199.882	1.96946	0.159792	7.05614e-36	3.42997e-34	UniRef100_UPI000E21BFD2 extra-large guanine nucleotide-binding protein 1-like isoform X1 n=1 Tax=Glycine max TaxID=3847 RepID=UPI000E21BFD2
Glyma.12G048000	259.304	1.96873	0.153356	9.24252e-39	4.93805e-37	UniRef100_I1LQ90 Uncharacterized protein n=1 Tax=Glycine max TaxID=3847 RepID=I1LQ90_SOYBN
Glyma.02G142500	91.7643	1.96416	0.240114	2.49331e-17	4.94784e-16	UniRef100_A0A0B2QB67 Auxin-induced protein n=2 Tax=Soja TaxID=1462606 RepID=A0A0B2QB67_GLYSO
Glyma.08G314100	11.8802	1.96335	0.67357	0.000258497	0.00127022	UniRef100_K7LA24 ANK_REP_REGION domain-containing protein n=1 Tax=Glycine max TaxID=3847 RepID=K7LA24_SOYBN
Glyma.17G244900	7.35544	1.96151	0.986885	0.00253997	0.00977788	UniRef100_I1MXR6 Carboxypeptidase n=2 Tax=Glycine max TaxID=3847 RepID=I1MXR6_SOYBN
Glyma.13G039800	11.8195	1.96112	0.688013	0.00031528	0.00151968	UniRef100_K7LY00 VQ domain-containing protein n=2 Tax=Soja TaxID=1462606 RepID=K7LY00_SOYBN
Glyma.07G199400	9.9339	1.96003	0.784301	0.000752139	0.00333763	UniRef100_A0A445JZ64 VARLMGL domain-containing protein n=3 Tax=Soja TaxID=1462606 RepID=A0A445JZ64_GLYSO
Glyma.07G206900	31.2215	1.95804	0.398121	6.84843e-08	6.11482e-07	UniRef100_I1KLU8 Uncharacterized protein n=2 Tax=Soja TaxID=1462606 RepID=I1KLU8_SOYBN
Glyma.03G078200	3613.37	1.95674	0.0746232	1.23231e-152	6.84731e-150	UniRef100_I1JLR1 Uncharacterized protein n=1 Tax=Glycine max TaxID=3847 RepID=I1JLR1_SOYBN
Glyma.19G002700	604.034	1.95038	0.117911	1.74501e-62	1.73621e-60	UniRef100_K7MVQ9 Uncharacterized protein n=1 Tax=Glycine max TaxID=3847 RepID=K7MVQ9_SOYBN
Glyma.12G216100	845.961	1.95019	0.0956398	1.20881e-93	2.33469e-91	UniRef100_A0A445HTJ2 Chitin-inducible gibberellin-responsive protein 1 isoform A n=1 Tax=Glycine soja TaxID=3848 RepID=A0A445HTJ2_GLYSO
Glyma.03G031200	279.825	1.94669	0.137797	2.22222e-46	1.43321e-44	UniRef100_UPI0003DE843C cytochrome P450 71B37-like isoform X1 n=1 Tax=Glycine max TaxID=3847 RepID=UPI0003DE843C
Glyma.12G087200	2514.65	1.94547	0.0725186	1.26875e-159	7.9006e-157	UniRef100_A0A0R0HCQ0 Uncharacterized protein n=2 Tax=Soja TaxID=1462606 RepID=A0A0R0HCQ0_SOYBN
Glyma.05G024400	11.9578	1.94218	0.66618	0.000249674	0.00123122	UniRef100_I1JZM1 Protein kinase domain-containing protein n=2 Tax=Soja TaxID=1462606 RepID=I1JZM1_SOYBN
Glyma.02G010100	36.2487	1.94175	0.37492	1.87252e-08	1.78632e-07	UniRef100_I1JBD7 Fe2OG dioxygenase domain-containing protein n=1 Tax=Glycine max TaxID=3847 RepID=I1JBD7_SOYBN
Glyma.17G067800	517.006	1.94116	0.112055	2.32185e-68	2.7676e-66	UniRef100_I1MSV8 Glyco_transf_20 domain-containing protein n=2 Tax=Soja TaxID=1462606 RepID=I1MSV8_SOYBN
Glyma.06G300200	381.332	1.93902	0.12259	1.57172e-57	1.37447e-55	UniRef100_K7KY78 Uncharacterized protein n=3 Tax=Soja TaxID=1462606 RepID=K7KY78_SOYBN
Glyma.13G167700	182.631	1.93862	0.172473	1.85724e-30	7.22313e-29	UniRef100_I1LZZ3 Uncharacterized protein n=2 Tax=Soja TaxID=1462606 RepID=I1LZZ3_SOYBN
Glyma.04G042300	49.3961	1.93785	0.322598	1.42639e-10	1.71609e-09	UniRef100_Q0PJL2 MYB transcription factor MYB68 n=2 Tax=Glycine max TaxID=3847 RepID=Q0PJL2_SOYBN
Glyma.13G359700	9.51685	1.93776	0.76646	0.000752845	0.00334036	UniRef100_A0A0R0GZ52 Uncharacterized protein n=1 Tax=Glycine max TaxID=3847 RepID=A0A0R0GZ52_SOYBN
Glyma.05G110600	40.4214	1.93739	0.342316	1.26461e-09	1.37531e-08	UniRef100_A0A0B2SRQ2 Transcription factor bHLH25 n=2 Tax=Soja TaxID=1462606 RepID=A0A0B2SRQ2_GLYSO
Glyma.06G229900	540.895	1.93628	0.108525	3.27011e-72	4.23321e-70	UniRef100_I1KDL4 Phosphoenolpyruvate carboxylase n=1 Tax=Glycine max TaxID=3847 RepID=I1KDL4_SOYBN
Glyma.09G233800	24.1414	1.93433	0.473658	3.45429e-06	2.42297e-05	UniRef100_K7LFN0 AP2/ERF domain-containing protein n=2 Tax=Soja TaxID=1462606 RepID=K7LFN0_SOYBN
Glyma.13G130300	75.1086	1.93047	0.261656	1.35717e-14	2.27034e-13	UniRef100_K7LZG4 ANK_REP_REGION domain-containing protein n=1 Tax=Glycine max TaxID=3847 RepID=K7LZG4_SOYBN
Glyma.12G200400	686	1.92705	0.209004	2.22507e-21	5.56914e-20	UniRef100_I1LUC4 Uncharacterized protein n=2 Tax=Soja TaxID=1462606 RepID=I1LUC4_SOYBN
Glyma.01G191900	124.639	1.92305	0.200013	5.9755e-23	1.6387e-21	UniRef100_A0A445M589 Acyl-CoA-binding domain-containing protein 3 isoform A n=3 Tax=Soja TaxID=1462606 RepID=A0A445M589_GLYSO
Glyma.06G150400	165.297	1.92304	0.182196	3.69487e-27	1.2322e-25	UniRef100_I1KBG6 RING-type domain-containing protein n=1 Tax=Glycine max TaxID=3847 RepID=I1KBG6_SOYBN
Glyma.19G148600	137.645	1.92291	0.186724	6.04733e-26	1.89758e-24	UniRef100_K7MYG5 Uncharacterized protein n=1 Tax=Glycine max TaxID=3847 RepID=K7MYG5_SOYBN
Glyma.19G098500	23031.3	1.91998	0.0626461	2.1898e-207	2.13754e-204	UniRef100_A0A0R0EKB4 GP-PDE domain-containing protein n=2 Tax=Soja TaxID=1462606 RepID=A0A0R0EKB4_SOYBN
Glyma.18G197800	4971.63	1.91502	0.0586912	1.38065e-234	1.9946e-231	UniRef100_A0A445FV34 Glycerol-3-phosphate 2-O-acyltransferase 6 n=3 Tax=Glycine soja TaxID=3848 RepID=A0A445FV34_GLYSO
Glyma.05G036300	15.3188	1.91447	0.58455	7.40276e-05	0.000406083	UniRef100_K7KMP5 PABS domain-containing protein n=1 Tax=Glycine max TaxID=3847 RepID=K7KMP5_SOYBN
Glyma.11G156700	11.399	1.91318	0.71996	0.000491576	0.00227911	UniRef100_A0A0B2QJ17 Trihelix transcription factor ASIL2 n=2 Tax=Soja TaxID=1462606 RepID=A0A0B2QJ17_GLYSO
Glyma.18G148500	303.077	1.9124	0.142141	2.75189e-42	1.59279e-40	UniRef100_A0A0B2R6P8 UDP-glycosyltransferase 91A1 n=2 Tax=Soja TaxID=1462606 RepID=A0A0B2R6P8_GLYSO
Glyma.01G036000	71.9271	1.91176	0.263625	3.50414e-14	5.66767e-13	UniRef100_I1J5E3 Glycosyltransferase n=2 Tax=Soja TaxID=1462606 RepID=I1J5E3_SOYBN
Glyma.04G230000	11.6859	1.91121	0.699547	0.000436687	0.0020494	UniRef100_C6T3M7 Uncharacterized protein n=2 Tax=Soja TaxID=1462606 RepID=C6T3M7_SOYBN
Glyma.20G003500	410.172	1.91115	0.11937	1.06578e-58	9.48098e-57	UniRef100_A0A0B2NPP8 Isoliquiritigenin 2'-O-methyltransferase n=2 Tax=Soja TaxID=1462606 RepID=A0A0B2NPP8_GLYSO
Glyma.13G355000	49.2906	1.90932	0.332137	7.03279e-10	7.85658e-09	UniRef100_K7M3S0 Uncharacterized protein n=1 Tax=Glycine max TaxID=3847 RepID=K7M3S0_SOYBN
Glyma.13G046100	626.282	1.90837	0.0984014	7.37447e-85	1.19975e-82	UniRef100_C6SVR4 Uncharacterized protein n=1 Tax=Glycine max TaxID=3847 RepID=C6SVR4_SOYBN
Glyma.05G233400	10.2595	1.90768	0.789233	0.00098159	0.00422426	UniRef100_A0A368UMR9 Uncharacterized protein n=1 Tax=Glycine max TaxID=3847 RepID=A0A368UMR9_SOYBN
Glyma.19G217800	39.8506	1.90526	0.34846	3.75333e-09	3.88644e-08	UniRef100_I1NBE0 WRKY transcription factor n=2 Tax=Soja TaxID=1462606 RepID=I1NBE0_SOYBN
Glyma.13G117300	860.068	1.9052	0.0878723	2.5244e-105	6.33152e-103	UniRef100_C6SWX8 Uncharacterized protein n=2 Tax=Soja TaxID=1462606 RepID=C6SWX8_SOYBN
Glyma.17G128900	826.417	1.90391	0.0984901	1.98231e-84	3.18201e-82	UniRef100_I1MUN9 Uncharacterized protein n=1 Tax=Glycine max TaxID=3847 RepID=I1MUN9_SOYBN
Glyma.18G045200	3249.45	1.9038	0.0609768	3.38446e-215	3.81989e-212	UniRef100_A0A0B2PHH1 Uncharacterized protein n=2 Tax=Soja TaxID=1462606 RepID=A0A0B2PHH1_GLYSO
Glyma.16G021000	142.822	1.90188	0.18675	2.2529e-25	6.88977e-24	UniRef100_I1MKF3 Homeobox domain-containing protein n=2 Tax=Glycine max TaxID=3847 RepID=I1MKF3_SOYBN
Glyma.19G008500	24.5024	1.90186	0.448835	1.80986e-06	1.32134e-05	UniRef100_A0A0B2QQ27 2-methylene-furan-3-one reductase n=2 Tax=Soja TaxID=1462606 RepID=A0A0B2QQ27_GLYSO
Glyma.13G093600	835.518	1.89729	0.0972512	6.02163e-86	9.93074e-84	UniRef100_K7LWW9 Protein kinase domain-containing protein n=4 Tax=Soja TaxID=1462606 RepID=K7LWW9_SOYBN
Glyma.02G280100	208.469	1.89426	0.158289	4.41106e-34	1.99143e-32	UniRef100_I1JIY1 Uncharacterized protein n=3 Tax=Soja TaxID=1462606 RepID=I1JIY1_SOYBN
Glyma.02G257700	1098.84	1.88857	0.0862199	2.45501e-107	6.28847e-105	UniRef100_I1JI95 Fe2OG dioxygenase domain-containing protein n=2 Tax=Soja TaxID=1462606 RepID=I1JI95_SOYBN
Glyma.13G130100	87.6515	1.88839	0.249738	3.44271e-15	6.00679e-14	UniRef100_A0A445HF40 Transcription factor PIF1 isoform A n=5 Tax=Soja TaxID=1462606 RepID=A0A445HF40_GLYSO
Glyma.15G065900	181.092	1.88606	0.168308	3.08517e-30	1.18792e-28	UniRef100_I1ME84 B box-type domain-containing protein n=1 Tax=Glycine max TaxID=3847 RepID=I1ME84_SOYBN
Glyma.05G064200	364.158	1.88548	0.127311	1.25311e-50	9.03361e-49	UniRef100_I1K0U6 Lipase_3 domain-containing protein n=2 Tax=Soja TaxID=1462606 RepID=I1K0U6_SOYBN
Glyma.11G155000	39.3018	1.88482	0.369197	2.50881e-08	2.35966e-07	UniRef100_A0A0B2QIN6 Early nodulin-12A n=3 Tax=Soja TaxID=1462606 RepID=A0A0B2QIN6_GLYSO
Glyma.19G222200	24.48	1.88332	0.463221	3.68703e-06	2.57771e-05	UniRef100_K7MZN6 Uncharacterized protein n=2 Tax=Glycine max TaxID=3847 RepID=K7MZN6_SOYBN
Glyma.01G027900	21.9971	1.88245	0.500156	1.28226e-05	8.15628e-05	UniRef100_I1J563 Uncharacterized protein n=1 Tax=Glycine max TaxID=3847 RepID=I1J563_SOYBN
Glyma.04G253900	217.923	1.87932	0.157143	6.38129e-34	2.85592e-32	UniRef100_I1JZB0 Uncharacterized protein n=2 Tax=Soja TaxID=1462606 RepID=I1JZB0_SOYBN
Glyma.20G248900	28.1068	1.8783	0.436879	1.25698e-06	9.39927e-06	UniRef100_A0A0B2R583 PPM-type phosphatase domain-containing protein n=2 Tax=Soja TaxID=1462606 RepID=A0A0B2R583_GLYSO
Glyma.14G216500	12.5067	1.87507	0.69479	0.000464724	0.00216994	UniRef100_A0A445H8W7 B-box zinc finger protein 21 isoform A n=1 Tax=Glycine soja TaxID=3848 RepID=A0A445H8W7_GLYSO
Glyma.13G210000	27.6371	1.87379	0.417417	5.57963e-07	4.39903e-06	UniRef100_I1M160 DLH domain-containing protein n=1 Tax=Glycine max TaxID=3847 RepID=I1M160_SOYBN
Glyma.10G193500	377.269	1.87268	0.121264	7.02142e-55	5.72444e-53	UniRef100_I1LCI3 Superoxide dismutase n=2 Tax=Soja TaxID=1462606 RepID=I1LCI3_SOYBN
Glyma.13G152202	24.6048	1.87247	0.502834	1.55255e-05	9.7215e-05	UniRef100_K7LZW8 Uncharacterized protein n=2 Tax=Soja TaxID=1462606 RepID=K7LZW8_SOYBN
Glyma.02G116900	25.3951	1.87074	0.441389	1.69425e-06	1.24145e-05	UniRef100_C6T421 Uncharacterized protein n=1 Tax=Glycine max TaxID=3847 RepID=C6T421_SOYBN
Glyma.02G109800	821.136	1.86987	0.0930992	8.80193e-91	1.59748e-88	UniRef100_A0A0B2Q3A2 NAC domain-containing protein 29 n=2 Tax=Soja TaxID=1462606 RepID=A0A0B2Q3A2_GLYSO
Glyma.15G093100	312.172	1.86819	0.137727	4.43121e-43	2.60654e-41	UniRef100_I1MF23 Tify domain-containing protein n=3 Tax=Soja TaxID=1462606 RepID=I1MF23_SOYBN
Glyma.03G073500	209.139	1.86564	0.16897	2.45065e-29	9.05939e-28	UniRef100_I1JLZ2 AAI domain-containing protein n=3 Tax=Soja TaxID=1462606 RepID=I1JLZ2_SOYBN
Glyma.09G018900	24.6307	1.86436	0.490216	9.43385e-06	6.15578e-05	UniRef100_UPI000233D4C8 probable leucine-rich repeat receptor-like protein kinase At5g49770 n=1 Tax=Glycine max TaxID=3847 RepID=UPI000233D4C8
Glyma.10G010300	125.292	1.86303	0.196158	2.05847e-22	5.45457e-21	UniRef100_I1L7M3 Uncharacterized protein n=2 Tax=Glycine max TaxID=3847 RepID=I1L7M3_SOYBN
Glyma.07G039700	480.291	1.86256	0.111887	2.76013e-63	2.81604e-61	UniRef100_I1KHC5 Protein kinase domain-containing protein n=2 Tax=Soja TaxID=1462606 RepID=I1KHC5_SOYBN
Glyma.01G133501	45.0552	1.8613	0.336603	2.96128e-09	3.0938e-08	UniRef100_A0A0B2PR58 Transcription factor UNE10 n=3 Tax=Soja TaxID=1462606 RepID=A0A0B2PR58_GLYSO
Glyma.18G252300	62.5738	1.85901	0.289854	1.16687e-11	1.55169e-10	UniRef100_Q8LLR3 Ethylene-responsive element binding protein 1 n=2 Tax=Soja TaxID=1462606 RepID=Q8LLR3_SOYBN
Glyma.13G331800	13.6501	1.85805	0.631064	0.000238377	0.00118132	UniRef100_A0A445IDN0 Exocyst subunit Exo70 family protein n=1 Tax=Glycine soja TaxID=3848 RepID=A0A445IDN0_GLYSO
Glyma.09G224400	18.4115	1.85724	0.531756	3.69696e-05	0.000216162	UniRef100_K7LFF1 Uncharacterized protein n=2 Tax=Soja TaxID=1462606 RepID=K7LFF1_SOYBN
Glyma.12G000076	29.2909	1.85132	0.422913	8.91984e-07	6.84132e-06	UniRef100_UPI00098DC1D4 Fanconi anemia group J protein homolog isoform X1 n=1 Tax=Cajanus cajan TaxID=3821 RepID=UPI00098DC1D4
Glyma.18G294300	212.097	1.84981	0.171978	5.38216e-28	1.86552e-26	UniRef100_I1N5A1 Glutamine amidotransferase type-1 domain-containing protein n=1 Tax=Glycine max TaxID=3847 RepID=I1N5A1_SOYBN
Glyma.08G218100	1084.21	1.84551	0.0796189	6.47193e-120	1.99784e-117	UniRef100_I1KVL4 Epimerase domain-containing protein n=3 Tax=Soja TaxID=1462606 RepID=I1KVL4_SOYBN
Glyma.15G262800	207.357	1.84366	0.167653	3.43818e-29	1.2594e-27	UniRef100_I1MJD5 Uncharacterized protein n=1 Tax=Glycine max TaxID=3847 RepID=I1MJD5_SOYBN
Glyma.18G261900	56.6149	1.83511	0.289911	1.98169e-11	2.58105e-10	UniRef100_I1N4F8 Uncharacterized protein n=1 Tax=Glycine max TaxID=3847 RepID=I1N4F8_SOYBN
Glyma.12G072000	184.749	1.83307	0.168286	1.16307e-28	4.13858e-27	UniRef100_I1LQZ6 LOB domain-containing protein n=1 Tax=Glycine max TaxID=3847 RepID=I1LQZ6_SOYBN
Glyma.11G234300	3311.21	1.83141	0.0702103	4.23633e-151	2.28364e-148	UniRef100_A0A445HHC0 Wound-induced protein 1 n=3 Tax=Soja TaxID=1462606 RepID=A0A445HHC0_GLYSO
Glyma.18G044200	302.314	1.83131	0.132964	2.9902e-44	1.84295e-42	UniRef100_I1MZI3 HTH myb-type domain-containing protein n=1 Tax=Glycine max TaxID=3847 RepID=I1MZI3_SOYBN
Glyma.15G170100	330.532	1.83025	0.124594	7.29718e-50	5.14751e-48	UniRef100_K7MBY1 DUF4408 domain-containing protein n=2 Tax=Soja TaxID=1462606 RepID=K7MBY1_SOYBN
Glyma.07G023700	204.721	1.82938	0.167203	6.26375e-29	2.26002e-27	UniRef100_I1KGT7 Epimerase domain-containing protein n=3 Tax=Soja TaxID=1462606 RepID=I1KGT7_SOYBN
Glyma.14G118800	278.207	1.828	0.146855	1.61527e-36	8.09135e-35	UniRef100_K7M763 Protein kinase domain-containing protein n=2 Tax=Soja TaxID=1462606 RepID=K7M763_SOYBN
Glyma.09G246951	44.0078	1.82789	0.349125	1.42838e-08	1.38012e-07	UniRef100_A0A445J5P5 Transcription factor bHLH25 n=3 Tax=Soja TaxID=1462606 RepID=A0A445J5P5_GLYSO
Glyma.08G271900	2644.67	1.82776	0.0717157	2.40197e-142	1.1122e-139	UniRef100_A0A0R0IT59 BHLH domain-containing protein n=2 Tax=Soja TaxID=1462606 RepID=A0A0R0IT59_SOYBN
Glyma.06G295000	9.33019	1.82678	0.834739	0.00167317	0.00677161	UniRef100_K7KY47 AB hydrolase-1 domain-containing protein n=3 Tax=Soja TaxID=1462606 RepID=K7KY47_SOYBN
Glyma.12G094800	154.42	1.82326	0.174913	1.92456e-26	6.14583e-25	UniRef100_A0A445HN01 BEL1-like homeodomain protein 1 isoform A n=2 Tax=Soja TaxID=1462606 RepID=A0A445HN01_GLYSO
Glyma.13G209600	161.563	1.82284	0.173133	6.12708e-27	2.01262e-25	UniRef100_I1M157 Uncharacterized protein n=1 Tax=Glycine max TaxID=3847 RepID=I1M157_SOYBN
Glyma.09G123800	50.492	1.82251	0.305179	1.98401e-10	2.35557e-09	UniRef100_C6TFE2 Uncharacterized protein n=2 Tax=Soja TaxID=1462606 RepID=C6TFE2_SOYBN
Glyma.05G119900	26.5	1.82069	0.41953	1.18655e-06	8.90395e-06	UniRef100_A0A445JB95 Beta-xylosidase/alpha-L-arabinofuranosidase 2 isoform D n=1 Tax=Glycine soja TaxID=3848 RepID=A0A445JB95_GLYSO
Glyma.08G118000	498.93	1.82028	0.113687	9.89656e-59	8.82554e-57	UniRef100_I1KSG1 Uncharacterized protein n=1 Tax=Glycine max TaxID=3847 RepID=I1KSG1_SOYBN
Glyma.14G216300	4602.7	1.81897	0.0705466	2.33283e-147	1.18669e-144	UniRef100_I1MC68 Uncharacterized protein n=1 Tax=Glycine max TaxID=3847 RepID=I1MC68_SOYBN
Glyma.18G158300	29.67	1.81864	0.443901	3.33444e-06	2.34619e-05	UniRef100_I1N1Z1 Uncharacterized protein n=1 Tax=Glycine max TaxID=3847 RepID=I1N1Z1_SOYBN
Glyma.15G228300	559.48	1.81832	0.117147	2.11544e-55	1.74039e-53	UniRef100_A0A0B2PYK8 Uncharacterized protein n=2 Tax=Soja TaxID=1462606 RepID=A0A0B2PYK8_GLYSO
Glyma.15G033600	135.672	1.81806	0.184857	7.36418e-24	2.10785e-22	UniRef100_C6TDH5 C2H2-type domain-containing protein n=1 Tax=Glycine max TaxID=3847 RepID=C6TDH5_SOYBN
Glyma.13G328200	292.989	1.81793	0.133512	3.43591e-43	2.02769e-41	UniRef100_I1M4M9 Uncharacterized protein n=2 Tax=Soja TaxID=1462606 RepID=I1M4M9_SOYBN
Glyma.19G242000	65.1927	1.81782	0.29674	8.41055e-11	1.03181e-09	UniRef100_A0A0R0ETE6 Uncharacterized protein n=2 Tax=Soja TaxID=1462606 RepID=A0A0R0ETE6_SOYBN
Glyma.08G055300	9.64099	1.81421	0.790349	0.00141229	0.00583947	UniRef100_A0A0B2NST2 Uncharacterized protein n=2 Tax=Soja TaxID=1462606 RepID=A0A0B2NST2_GLYSO
Glyma.02G135100	143.632	1.81144	0.195356	1.55187e-21	3.91403e-20	UniRef100_I1JEX2 Peroxidase n=3 Tax=Soja TaxID=1462606 RepID=I1JEX2_SOYBN
Glyma.09G049100	137.506	1.80799	0.198474	7.41569e-21	1.80968e-19	UniRef100_Q2LAL0 Cytochrome P450 monooxygenase CYP81E11 n=1 Tax=Glycine max TaxID=3847 RepID=Q2LAL0_SOYBN
Glyma.12G091000	41.7175	1.80422	0.330964	4.603e-09	4.72023e-08	UniRef100_UPI00103E3106 putative protein TPRXL n=1 Tax=Glycine soja TaxID=3848 RepID=UPI00103E3106
Glyma.02G210300	550.726	1.80278	0.117923	6.06976e-54	4.79697e-52	UniRef100_I1JGW3 Uncharacterized protein n=1 Tax=Glycine max TaxID=3847 RepID=I1JGW3_SOYBN
Glyma.13G201100	410.835	1.80181	0.126782	7.1329e-47	4.67548e-45	UniRef100_K7M0T2 Uncharacterized protein n=2 Tax=Soja TaxID=1462606 RepID=K7M0T2_SOYBN
Glyma.19G161400	373.805	1.80126	0.118933	6.91634e-53	5.2589e-51	UniRef100_C6SYI0 Uncharacterized protein n=2 Tax=Soja TaxID=1462606 RepID=C6SYI0_SOYBN
Glyma.08G097400	16.3361	1.80073	0.592477	0.000176982	0.000899785	UniRef100_A0A445JC74 Receptor like protein 29 n=1 Tax=Glycine soja TaxID=3848 RepID=A0A445JC74_GLYSO
Glyma.09G250800	72.2156	1.79871	0.301089	2.10613e-10	2.49074e-09	UniRef100_C6T3Q7 PsaL domain-containing protein n=4 Tax=NPAAA clade TaxID=2231382 RepID=C6T3Q7_SOYBN
Glyma.19G260900	502.023	1.7922	0.106535	1.42334e-64	1.49874e-62	UniRef100_A0A0R0ETE0 HTH myb-type domain-containing protein n=3 Tax=Glycine max TaxID=3847 RepID=A0A0R0ETE0_SOYBN
Glyma.18G292100	57.3749	1.79048	0.285817	3.41158e-11	4.36162e-10	UniRef100_I1N581 Uncharacterized protein n=1 Tax=Glycine max TaxID=3847 RepID=I1N581_SOYBN
Glyma.16G069600	50.3855	1.78593	0.322776	2.64821e-09	2.78687e-08	UniRef100_A0A0R0FV26 Uncharacterized protein n=1 Tax=Glycine max TaxID=3847 RepID=A0A0R0FV26_SOYBN
Glyma.04G076000	2665.97	1.784	0.0817001	8.38325e-107	2.13224e-104	UniRef100_I1JUN1 Uncharacterized protein n=2 Tax=Soja TaxID=1462606 RepID=I1JUN1_SOYBN
Glyma.07G147100	82.036	1.78359	0.254101	1.87025e-13	2.86585e-12	UniRef100_C6T506 Uncharacterized protein n=1 Tax=Glycine max TaxID=3847 RepID=C6T506_SOYBN
Glyma.20G170300	169.827	1.78301	0.174103	9.88368e-26	3.07202e-24	UniRef100_Q42810 GmCK2p n=2 Tax=Soja TaxID=1462606 RepID=Q42810_SOYBN
Glyma.06G265200	11.2653	1.78045	0.704406	0.000761352	0.00337437	UniRef100_UPI0003DE8D86 disease resistance protein RLM3 n=1 Tax=Glycine max TaxID=3847 RepID=UPI0003DE8D86
Glyma.01G114900	24.4777	1.7798	0.451995	6.72849e-06	4.50274e-05	UniRef100_A0A0B2R371 Lactosylceramide 4-alpha-galactosyltransferase n=1 Tax=Glycine soja TaxID=3848 RepID=A0A0B2R371_GLYSO
Glyma.03G003100	19.8229	1.77797	0.500054	3.06564e-05	0.000181839	UniRef100_A0A0R0KJL9 Receptor-like serine/threonine-protein kinase n=1 Tax=Glycine max TaxID=3847 RepID=A0A0R0KJL9_SOYBN
Glyma.12G092800	57.836	1.77777	0.282242	2.73092e-11	3.52134e-10	UniRef100_I1LRJ6 Uncharacterized protein n=1 Tax=Glycine max TaxID=3847 RepID=I1LRJ6_SOYBN
Glyma.04G174600	37.7081	1.77693	0.367568	1.07889e-07	9.40986e-07	UniRef100_I1JWZ1 Uncharacterized protein n=1 Tax=Glycine max TaxID=3847 RepID=I1JWZ1_SOYBN
Glyma.07G151300	3411.97	1.77625	0.0649881	1.68486e-165	1.08664e-162	UniRef100_A0A0B2SD73 Omega-3 fatty acid desaturase, chloroplastic n=2 Tax=Soja TaxID=1462606 RepID=A0A0B2SD73_GLYSO
Glyma.02G154000	43.5611	1.77383	0.331107	6.96845e-09	6.9756e-08	UniRef100_A0A0R0KWV4 CBFD_NFYB_HMF domain-containing protein n=3 Tax=Soja TaxID=1462606 RepID=A0A0R0KWV4_SOYBN
Glyma.07G096900	10.1991	1.77364	0.865829	0.0021856	0.00858386	UniRef100_A0A0B2SCU2 Chlorophyllase-1 n=2 Tax=Soja TaxID=1462606 RepID=A0A0B2SCU2_GLYSO
Glyma.02G297700	530.74	1.77238	0.23062	1.23807e-15	2.23465e-14	UniRef100_A0A445LW17 Scarecrow-like protein 5 n=3 Tax=Soja TaxID=1462606 RepID=A0A445LW17_GLYSO
Glyma.11G252200	410.761	1.77158	0.120744	6.71641e-50	4.7471e-48	UniRef100_I1LN58 Uncharacterized protein n=1 Tax=Glycine max TaxID=3847 RepID=I1LN58_SOYBN
Glyma.02G085700	24.2405	1.76995	0.474824	1.5771e-05	9.86492e-05	UniRef100_I1JDI1 Uncharacterized protein n=1 Tax=Glycine max TaxID=3847 RepID=I1JDI1_SOYBN
Glyma.12G054100	2781.92	1.76809	0.0751558	1.56553e-123	5.33417e-121	UniRef100_I1LQG1 Uncharacterized protein n=3 Tax=Soja TaxID=1462606 RepID=I1LQG1_SOYBN
Glyma.13G152000	149.302	1.76429	0.184026	8.64736e-23	2.3412e-21	UniRef100_I1LZG3 AP2/ERF domain-containing protein n=2 Tax=Soja TaxID=1462606 RepID=I1LZG3_SOYBN
Glyma.08G164800	43.4588	1.76377	0.331524	8.46959e-09	8.4153e-08	UniRef100_I1KTX5 ZT_dimer domain-containing protein n=2 Tax=Soja TaxID=1462606 RepID=I1KTX5_SOYBN
Glyma.11G112150	43.2475	1.76321	0.331564	8.76537e-09	8.69244e-08	UniRef100_A0A0B2RAZ7 Pentatricopeptide repeat-containing protein, chloroplastic n=1 Tax=Glycine soja TaxID=3848 RepID=A0A0B2RAZ7_GLYSO
Glyma.13G348600	69.6448	1.76218	0.26741	4.12372e-12	5.69546e-11	UniRef100_K7M3M5 Uncharacterized protein n=3 Tax=Soja TaxID=1462606 RepID=K7M3M5_SOYBN
Glyma.09G140800	798.258	1.76155	0.109298	2.14971e-59	1.96064e-57	UniRef100_A0A0R0IEC7 RING-type domain-containing protein n=2 Tax=Soja TaxID=1462606 RepID=A0A0R0IEC7_SOYBN
Glyma.15G076500	1314.96	1.76144	0.0844808	1.0273e-97	2.18254e-95	UniRef100_I1MEL2 Uncharacterized protein n=1 Tax=Glycine max TaxID=3847 RepID=I1MEL2_SOYBN
Glyma.18G111900	151.31	1.75969	0.18007	1.31892e-23	3.72151e-22	UniRef100_A0A0B2RBR2 Phytoene synthase, chloroplastic n=3 Tax=Soja TaxID=1462606 RepID=A0A0B2RBR2_GLYSO
Glyma.02G239800	54.9268	1.75713	0.296373	2.79863e-10	3.26902e-09	UniRef100_I1JHR1 Uncharacterized protein n=2 Tax=Soja TaxID=1462606 RepID=I1JHR1_SOYBN
Glyma.13G263800	17.977	1.75685	0.534957	7.52958e-05	0.000412164	UniRef100_A0A0R0H0V4 Fe2OG dioxygenase domain-containing protein n=2 Tax=Soja TaxID=1462606 RepID=A0A0R0H0V4_SOYBN
Glyma.06G011100	41.7734	1.75513	0.340919	2.14888e-08	2.0365e-07	UniRef100_I1K760 Uncharacterized protein n=1 Tax=Glycine max TaxID=3847 RepID=I1K760_SOYBN
Glyma.09G062000	70.5992	1.75358	0.255009	5.94337e-13	8.79741e-12	UniRef100_C6T4H6 Uncharacterized protein n=2 Tax=Soja TaxID=1462606 RepID=C6T4H6_SOYBN
Glyma.13G126200	185.005	1.74873	0.165622	4.30891e-27	1.43038e-25	UniRef100_A0A0B2SXD8 Myb family transcription factor APL n=3 Tax=Soja TaxID=1462606 RepID=A0A0B2SXD8_GLYSO
Glyma.09G011100	44.6463	1.74853	0.320498	4.33817e-09	4.46005e-08	UniRef100_I1L008 Inositol-1-monophosphatase n=2 Tax=Soja TaxID=1462606 RepID=I1L008_SOYBN
Glyma.06G298900	31.0023	1.74631	0.40249	1.17474e-06	8.81897e-06	UniRef100_I1KF62 Uncharacterized protein n=2 Tax=Soja TaxID=1462606 RepID=I1KF62_SOYBN
Glyma.12G012600	15.8453	1.74495	0.605159	0.00029426	0.00142808	UniRef100_I1LP14 Uncharacterized protein n=1 Tax=Glycine max TaxID=3847 RepID=I1LP14_SOYBN
Glyma.12G221800	19.4227	1.74254	0.520249	5.95923e-05	0.000334259	UniRef100_K7LWC9 Uncharacterized protein n=1 Tax=Glycine max TaxID=3847 RepID=K7LWC9_SOYBN
Glyma.14G081500	433.639	1.7421	0.114463	2.00315e-53	1.56597e-51	UniRef100_I1M8K5 Patatin n=1 Tax=Glycine max TaxID=3847 RepID=I1M8K5_SOYBN
Glyma.10G055000	64.1581	1.74194	0.285486	9.45316e-11	1.15657e-09	UniRef100_I1L8X7 Uncharacterized protein n=3 Tax=Soja TaxID=1462606 RepID=I1L8X7_SOYBN
Glyma.12G167400	1782.86	1.74122	0.0759721	2.43936e-117	6.99224e-115	UniRef100_A0A0B2RAL0 VOC domain-containing protein n=2 Tax=Soja TaxID=1462606 RepID=A0A0B2RAL0_GLYSO
Glyma.10G205500	180.929	1.74009	0.176959	8.49767e-24	2.42425e-22	UniRef100_I1LCU6 Uncharacterized protein n=2 Tax=Soja TaxID=1462606 RepID=I1LCU6_SOYBN
Glyma.03G164000	165.921	1.73954	0.192793	1.75969e-20	4.21451e-19	UniRef100_K7KFG0 ALOG domain-containing protein n=1 Tax=Glycine max TaxID=3847 RepID=K7KFG0_SOYBN
Glyma.14G110900	618.26	1.73887	0.0988229	2.82301e-70	3.46798e-68	UniRef100_A0A0B2PRS5 Zinc finger protein 3 n=2 Tax=Soja TaxID=1462606 RepID=A0A0B2PRS5_GLYSO
Glyma.08G220000	2520.57	1.73855	0.0686047	9.62337e-143	4.51386e-140	UniRef100_A0A445JIE1 Chaperone protein dnaJ 8, chloroplastic n=2 Tax=Soja TaxID=1462606 RepID=A0A445JIE1_GLYSO
Glyma.13G301900	765.696	1.73578	0.103904	1.34603e-63	1.39697e-61	UniRef100_I1M3X7 Uncharacterized protein n=2 Tax=Soja TaxID=1462606 RepID=I1M3X7_SOYBN
Glyma.14G089063	99.4679	1.73416	0.216636	1.19184e-16	2.27755e-15	UniRef100_A0A445H460 Phytosulfokine 3 n=2 Tax=Soja TaxID=1462606 RepID=A0A445H460_GLYSO
Glyma.02G138600	11.5081	1.73149	0.812211	0.00168581	0.00681436	UniRef100_A0A0B2RD58 Uncharacterized protein n=2 Tax=Soja TaxID=1462606 RepID=A0A0B2RD58_GLYSO
Glyma.13G089200	159.419	1.73087	0.172084	7.49881e-25	2.24015e-23	UniRef100_A0A445HD18 Cryptochrome-1 isoform A n=4 Tax=Soja TaxID=1462606 RepID=A0A445HD18_GLYSO
Glyma.13G152780	205.618	1.72992	0.157684	5.28267e-29	1.91368e-27	UniRef100_K7LZY1 Uncharacterized protein n=1 Tax=Glycine max TaxID=3847 RepID=K7LZY1_SOYBN
Glyma.13G237000	2020.6	1.7295	0.0746089	8.0064e-120	2.42998e-117	UniRef100_C6TKV0 Uncharacterized protein n=2 Tax=Glycine max TaxID=3847 RepID=C6TKV0_SOYBN
Glyma.01G048000	151.857	1.72875	0.176715	1.27315e-23	3.6008e-22	UniRef100_K7K1U7 Uncharacterized protein n=3 Tax=Soja TaxID=1462606 RepID=K7K1U7_SOYBN
Glyma.11G000500	722.868	1.72809	0.102336	5.20805e-65	5.58158e-63	UniRef100_A0A0B2PD91 Glycosyltransferase n=2 Tax=Soja TaxID=1462606 RepID=A0A0B2PD91_GLYSO
Glyma.10G265100	111.694	1.7268	0.207114	6.47569e-18	1.32888e-16	UniRef100_C6TFT5 Uncharacterized protein n=2 Tax=Soja TaxID=1462606 RepID=C6TFT5_SOYBN
Glyma.12G217400	7242.51	1.72651	0.148067	1.89115e-32	8.09272e-31	UniRef100_C6TI83 BURP domain-containing protein n=1 Tax=Glycine max TaxID=3847 RepID=C6TI83_SOYBN
Glyma.17G053600	135.283	1.72412	0.189917	1.01933e-20	2.46916e-19	UniRef100_I1MSF5 Uncharacterized protein n=1 Tax=Glycine max TaxID=3847 RepID=I1MSF5_SOYBN
Glyma.15G071300	3754.61	1.72349	0.0686747	4.84201e-140	2.10698e-137	UniRef100_I1MEE7 DUF3700 domain-containing protein n=1 Tax=Glycine max TaxID=3847 RepID=I1MEE7_SOYBN
Glyma.12G114200	1569.98	1.72033	0.0854821	3.61771e-91	6.63254e-89	UniRef100_I1LS37 Uncharacterized protein n=2 Tax=Soja TaxID=1462606 RepID=I1LS37_SOYBN
Glyma.18G036450	109.268	1.71861	0.209424	2.18154e-17	4.34827e-16	UniRef100_A0A445FNR1 L-type lectin-domain containing receptor kinase S.4 n=2 Tax=Glycine soja TaxID=3848 RepID=A0A445FNR1_GLYSO
Glyma.06G111702	13.5724	1.71792	0.647466	0.000520455	0.0024019	UniRef100_UPI0010386CEB WAT1-related protein At4g08290-like isoform X5 n=1 Tax=Glycine soja TaxID=3848 RepID=UPI0010386CEB
Glyma.06G136200	3720.35	1.71786	0.063612	1.21755e-161	7.71481e-159	UniRef100_A0A445K9B3 StAR-related lipid transfer protein 7, mitochondrial n=1 Tax=Glycine soja TaxID=3848 RepID=A0A445K9B3_GLYSO
Glyma.14G157600	57.3918	1.71648	0.321454	7.56335e-09	7.54184e-08	UniRef100_K7M735 Uncharacterized protein n=3 Tax=Soja TaxID=1462606 RepID=K7M735_SOYBN
Glyma.04G227900	235.904	1.71647	0.159671	4.67215e-28	1.62723e-26	UniRef100_A0A0B2QI34 Flavanone 3-dioxygenase n=2 Tax=Soja TaxID=1462606 RepID=A0A0B2QI34_GLYSO
Glyma.16G088800	70.6065	1.71621	0.254565	1.43517e-12	2.05283e-11	UniRef100_A0A0R0FXS8 Uncharacterized protein n=1 Tax=Glycine max TaxID=3847 RepID=A0A0R0FXS8_SOYBN
Glyma.17G125300	97.9169	1.71398	0.217871	3.13779e-16	5.86582e-15	UniRef100_I1MUJ8 Uncharacterized protein n=1 Tax=Glycine max TaxID=3847 RepID=I1MUJ8_SOYBN
Glyma.18G036500	108.384	1.71124	0.211752	6.01081e-17	1.16654e-15	UniRef100_A0A0R0F710 Uncharacterized protein n=1 Tax=Glycine max TaxID=3847 RepID=A0A0R0F710_SOYBN
Glyma.13G121900	58.1884	1.71057	0.298041	9.09116e-10	1.00442e-08	UniRef100_A0A0R0GUI7 HIT-type domain-containing protein n=3 Tax=Glycine max TaxID=3847 RepID=A0A0R0GUI7_SOYBN
Glyma.17G125400	2814.55	1.70797	0.0755639	3.71841e-114	1.03306e-111	UniRef100_I1MUJ9 Uncharacterized protein n=3 Tax=Soja TaxID=1462606 RepID=I1MUJ9_SOYBN
Glyma.13G107900	1077.09	1.70722	0.0931063	3.64092e-76	5.01905e-74	UniRef100_A0A0B2PK06 Nuclear transcription factor Y subunit A-3 n=2 Tax=Soja TaxID=1462606 RepID=A0A0B2PK06_GLYSO
Glyma.09G036500	78.495	1.70673	0.269158	2.35297e-11	3.04486e-10	UniRef100_K7LBN1 GRAS domain-containing protein n=1 Tax=Glycine max TaxID=3847 RepID=K7LBN1_SOYBN
Glyma.18G263700	1590.78	1.70567	0.0837188	2.27901e-93	4.35507e-91	UniRef100_A0A0R0F4I8 Uncharacterized protein n=2 Tax=Soja TaxID=1462606 RepID=A0A0R0F4I8_SOYBN
Glyma.09G050600	263.13	1.70566	0.153943	1.42024e-29	5.27723e-28	UniRef100_I1L151 AA_permease_C domain-containing protein n=2 Tax=Soja TaxID=1462606 RepID=I1L151_SOYBN
Glyma.17G250200	38.0284	1.70532	0.352232	1.12918e-07	9.82237e-07	UniRef100_K7MNU9 Uncharacterized protein n=1 Tax=Glycine max TaxID=3847 RepID=K7MNU9_SOYBN
Glyma.06G050300	210.213	1.70437	0.163361	1.55677e-26	4.99785e-25	UniRef100_I1K8B1 C3H1-type domain-containing protein n=2 Tax=Soja TaxID=1462606 RepID=I1K8B1_SOYBN
Glyma.18G209100	15.3798	1.70279	0.590828	0.000280866	0.00136786	UniRef100_A0A445FVN8 Protein SCAR2 isoform A n=2 Tax=Glycine soja TaxID=3848 RepID=A0A445FVN8_GLYSO
Glyma.18G210500	4668.17	1.70264	0.0595372	7.31624e-181	5.50502e-178	UniRef100_A0A0R0F2G6 Uncharacterized protein n=2 Tax=Soja TaxID=1462606 RepID=A0A0R0F2G6_SOYBN
Glyma.06G298700	1099.29	1.70156	0.0865352	3.96814e-87	6.69706e-85	UniRef100_K7KY73 Uncharacterized protein n=1 Tax=Glycine max TaxID=3847 RepID=K7KY73_SOYBN
Glyma.17G037500	737.376	1.701	0.0957968	1.42091e-71	1.81983e-69	UniRef100_K7MJT5 Uncharacterized protein n=2 Tax=Soja TaxID=1462606 RepID=K7MJT5_SOYBN
Glyma.09G008400	110.926	1.6995	0.234974	3.48823e-14	5.64446e-13	UniRef100_I1KZX0 Fe2OG dioxygenase domain-containing protein n=2 Tax=Soja TaxID=1462606 RepID=I1KZX0_SOYBN
Glyma.04G133400	20.4399	1.69914	0.492209	4.64027e-05	0.000266189	UniRef100_K7KJY1 Uncharacterized protein n=2 Tax=Soja TaxID=1462606 RepID=K7KJY1_SOYBN
Glyma.13G052800	2008.51	1.69873	0.0791	2.48418e-103	5.94181e-101	UniRef100_A0A0B2PGI4 Hyoscyamine 6-dioxygenase n=2 Tax=Soja TaxID=1462606 RepID=A0A0B2PGI4_GLYSO
Glyma.13G049700	593.302	1.69842	0.0993796	1.61384e-66	1.78794e-64	UniRef100_K7LXR0 Proline dehydrogenase n=1 Tax=Glycine max TaxID=3847 RepID=K7LXR0_SOYBN
Glyma.08G326900	9.54928	1.6944	0.774425	0.00176739	0.00710123	UniRef100_I1KYH7 Uncharacterized protein n=3 Tax=Glycine max TaxID=3847 RepID=I1KYH7_SOYBN
Glyma.10G221200	54.7845	1.69402	0.321807	1.33778e-08	1.29709e-07	UniRef100_K7LKU3 Uncharacterized protein n=1 Tax=Glycine max TaxID=3847 RepID=K7LKU3_SOYBN
Glyma.01G231800	12.7788	1.69019	0.673361	0.000763794	0.00338353	UniRef100_I1JAL0 Uncharacterized protein n=1 Tax=Glycine max TaxID=3847 RepID=I1JAL0_SOYBN
Glyma.05G141200	63.4462	1.69013	0.264919	1.61315e-11	2.11785e-10	UniRef100_A0A0B2SNE3 Protein TIFY 5A n=2 Tax=Soja TaxID=1462606 RepID=A0A0B2SNE3_GLYSO
Glyma.03G038600	20.5617	1.68976	0.485064	4.05318e-05	0.000235163	UniRef100_I1JL03 Peroxidase n=1 Tax=Glycine max TaxID=3847 RepID=I1JL03_SOYBN
Glyma.11G239900	1264.71	1.68867	0.0877888	1.89742e-83	2.97952e-81	UniRef100_I1LNL1 C2 domain-containing protein n=2 Tax=Soja TaxID=1462606 RepID=I1LNL1_SOYBN
Glyma.02G254100	178.163	1.6852	0.178695	3.48901e-22	9.11813e-21	UniRef100_K7KAQ5 Polyketide_cyc domain-containing protein n=1 Tax=Glycine max TaxID=3847 RepID=K7KAQ5_SOYBN
Glyma.05G219900	20.8917	1.68235	0.486568	4.25019e-05	0.000245607	UniRef100_A0A445KS08 Short-chain dehydrogenase TIC 32, chloroplastic isoform A n=1 Tax=Glycine soja TaxID=3848 RepID=A0A445KS08_GLYSO
Glyma.09G092400	56.5919	1.68026	0.299774	1.78667e-09	1.91368e-08	UniRef100_A0A0R0IBX6 Uncharacterized protein n=1 Tax=Glycine max TaxID=3847 RepID=A0A0R0IBX6_SOYBN
Glyma.03G069300	891.616	1.6786	0.103683	5.4758e-60	5.05805e-58	UniRef100_UPI0007191A2F L-type lectin-domain containing receptor kinase S.4 isoform X1 n=1 Tax=Glycine max TaxID=3847 RepID=UPI0007191A2F
Glyma.08G114700	129	1.67805	0.191763	1.92426e-19	4.36274e-18	UniRef100_I1KSC6 Uncharacterized protein n=2 Tax=Soja TaxID=1462606 RepID=I1KSC6_SOYBN
Glyma.05G007000	66.5686	1.6766	0.295637	1.392e-09	1.50704e-08	UniRef100_I1K1G7 Uncharacterized protein n=1 Tax=Glycine max TaxID=3847 RepID=I1K1G7_SOYBN
Glyma.20G031600	24.3837	1.67551	0.436299	1.07918e-05	6.9651e-05	UniRef100_A0A0B2QZ03 Ribulose-1,5 bisphosphate carboxylase/oxygenase large subunit N-methyltransferase, chloroplastic n=2 Tax=Soja TaxID=1462606 RepID=A0A0B2QZ03_GLYSO
Glyma.05G212900	91.7184	1.67368	0.229888	3.28113e-14	5.32126e-13	UniRef100_UPI0003DE8405 uncharacterized AAA domain-containing protein C16E9.10c-like isoform X1 n=1 Tax=Glycine max TaxID=3847 RepID=UPI0003DE8405
Glyma.05G224400	565.688	1.67268	0.116287	7.28544e-48	4.98349e-46	UniRef100_I1K618 Uncharacterized protein n=2 Tax=Soja TaxID=1462606 RepID=I1K618_SOYBN
Glyma.11G239400	1787.41	1.67223	0.0765969	1.16572e-106	2.94423e-104	UniRef100_I1LNL7 PLAT domain-containing protein n=2 Tax=Soja TaxID=1462606 RepID=I1LNL7_SOYBN
Glyma.02G257000	36.9625	1.67157	0.384181	1.07773e-06	8.15344e-06	UniRef100_A0A0B2SVJ2 Phosphoinositide phospholipase C n=2 Tax=Soja TaxID=1462606 RepID=A0A0B2SVJ2_GLYSO
Glyma.20G116700	200.068	1.67154	0.16007	1.39083e-26	4.48507e-25	UniRef100_A0A445F3Q9 Uncharacterized protein n=1 Tax=Glycine soja TaxID=3848 RepID=A0A445F3Q9_GLYSO
Glyma.05G074200	10.7805	1.67004	0.7171	0.00130484	0.00544065	UniRef100_I1K145 Uncharacterized protein n=2 Tax=Soja TaxID=1462606 RepID=I1K145_SOYBN
Glyma.08G159066	22.0928	1.66941	0.484219	4.47297e-05	0.000257327	UniRef100_A0A371F1Y8 F-box protein CPR30 (Fragment) n=1 Tax=Mucuna pruriens TaxID=157652 RepID=A0A371F1Y8_MUCPR
Glyma.14G031800	16.2978	1.66624	0.5743	0.000277541	0.00135331	UniRef100_I1M712 Oxygen-evolving enhancer protein 2 n=2 Tax=Soja TaxID=1462606 RepID=I1M712_SOYBN
Glyma.08G169451	29.8892	1.66598	0.441725	1.16052e-05	7.44615e-05	UniRef100_A0A445JFW1 Transcription factor JUNGBRUNNEN 1 n=1 Tax=Glycine soja TaxID=3848 RepID=A0A445JFW1_GLYSO
Glyma.04G087400	23.8598	1.66545	0.461424	2.5542e-05	0.000154279	UniRef100_K7KIZ3 DUF676 domain-containing protein n=1 Tax=Glycine max TaxID=3847 RepID=K7KIZ3_SOYBN
Glyma.14G083500	32.1869	1.66539	0.377265	9.04036e-07	6.92787e-06	UniRef100_I1M8N2 Remorin_C domain-containing protein n=1 Tax=Glycine max TaxID=3847 RepID=I1M8N2_SOYBN
Glyma.17G051700	11.4962	1.66537	0.679337	0.000960606	0.00414358	UniRef100_K7MK21 LysM domain-containing protein n=1 Tax=Glycine max TaxID=3847 RepID=K7MK21_SOYBN
Glyma.03G183000	20.7573	1.66509	0.4884	5.07901e-05	0.000288788	UniRef100_K7KFT7 Uncharacterized protein n=2 Tax=Soja TaxID=1462606 RepID=K7KFT7_SOYBN
Glyma.13G291200	35.8325	1.66397	0.371751	6.70006e-07	5.22648e-06	UniRef100_I1M3M3 Uncharacterized protein n=2 Tax=Soja TaxID=1462606 RepID=I1M3M3_SOYBN
Glyma.18G080200	48.9116	1.6639	0.328771	3.61155e-08	3.33431e-07	UniRef100_K7MQL0 Flavonoid 6-hydroxylase 2 n=3 Tax=Soja TaxID=1462606 RepID=K7MQL0_SOYBN
Glyma.03G071700	378.718	1.66361	0.132195	2.63841e-37	1.35743e-35	UniRef100_I1JM07 Uncharacterized protein n=2 Tax=Soja TaxID=1462606 RepID=I1JM07_SOYBN
Glyma.17G029200	81.6187	1.65857	0.234448	1.44554e-13	2.23688e-12	UniRef100_A0A0R0FIU5 PPM-type phosphatase domain-containing protein n=3 Tax=Soja TaxID=1462606 RepID=A0A0R0FIU5_SOYBN
Glyma.13G051600	5304.44	1.65555	0.0790623	2.21372e-98	4.81643e-96	UniRef100_A0A0B2P4R0 Isoleucine N-monooxygenase 2 n=2 Tax=Soja TaxID=1462606 RepID=A0A0B2P4R0_GLYSO
Glyma.08G023100	25.4877	1.65428	0.430767	1.09091e-05	7.03075e-05	UniRef100_A0A0R0IPL8 UDP-glucose 4-epimerase n=3 Tax=Soja TaxID=1462606 RepID=A0A0R0IPL8_SOYBN
Glyma.12G017300	93.0172	1.65426	0.224853	1.75681e-14	2.90792e-13	UniRef100_I1LP71 RRM domain-containing protein n=2 Tax=Soja TaxID=1462606 RepID=I1LP71_SOYBN
Glyma.05G077100	318.283	1.65422	0.136296	6.65374e-35	3.08489e-33	UniRef100_A0A0B2NWU4 Chloride channel protein n=1 Tax=Glycine soja TaxID=3848 RepID=A0A0B2NWU4_GLYSO
Glyma.10G128866	15.5078	1.65193	0.570292	0.000283906	0.00138155	UniRef100_UPI00023CDB66 receptor-like protein EIX2 n=1 Tax=Glycine max TaxID=3847 RepID=UPI00023CDB66
Glyma.18G297100	1952.81	1.65148	0.07484	6.56528e-109	1.6937e-106	UniRef100_I1N5C2 LOB domain-containing protein n=2 Tax=Soja TaxID=1462606 RepID=I1N5C2_SOYBN
Glyma.02G222600	40.1051	1.64974	0.334971	7.91598e-08	7.01599e-07	UniRef100_I1JH87 Uncharacterized protein n=1 Tax=Glycine max TaxID=3847 RepID=I1JH87_SOYBN
Glyma.03G099000	36.488	1.64816	0.353378	2.9096e-07	2.38398e-06	UniRef100_A0A0B2QS67 2-alkenal reductase (NADP(+)-dependent) n=2 Tax=Soja TaxID=1462606 RepID=A0A0B2QS67_GLYSO
Glyma.16G071200	14.0521	1.64682	0.599249	0.000443188	0.00207636	UniRef100_I1MLU7 F-box domain-containing protein n=2 Tax=Soja TaxID=1462606 RepID=I1MLU7_SOYBN
Glyma.17G053700	23.4638	1.64629	0.444657	1.85228e-05	0.000114475	UniRef100_A0A445G2W1 Heat stress transcription factor A-2 isoform A n=2 Tax=Soja TaxID=1462606 RepID=A0A445G2W1_GLYSO
Glyma.13G222600	76.8744	1.64307	0.250555	4.93894e-12	6.77734e-11	UniRef100_I1M1L6 Uncharacterized protein n=1 Tax=Glycine max TaxID=3847 RepID=I1M1L6_SOYBN
Glyma.07G196800	1060.91	1.64287	0.0848713	1.69904e-84	2.73948e-82	UniRef100_I1KLK0 Lipoxygenase n=1 Tax=Glycine max TaxID=3847 RepID=I1KLK0_SOYBN
Glyma.10G010700	51.2515	1.64287	0.311866	1.27846e-08	1.24392e-07	UniRef100_I1L7M7 Fe2OG dioxygenase domain-containing protein n=1 Tax=Glycine max TaxID=3847 RepID=I1L7M7_SOYBN
Glyma.20G009800	508.377	1.64126	0.104456	1.06898e-56	9.10577e-55	UniRef100_A0A0B2NUN9 Myb family transcription factor EFM isoform A n=2 Tax=Soja TaxID=1462606 RepID=A0A0B2NUN9_GLYSO
Glyma.16G200800	154.32	1.64121	0.185275	8.20704e-20	1.89887e-18	UniRef100_A0A445GKX0 Gibberellin 20 oxidase 2 n=2 Tax=Glycine soja TaxID=3848 RepID=A0A445GKX0_GLYSO
Glyma.06G154400	117.158	1.64112	0.219925	7.39289e-15	1.26245e-13	UniRef100_A0A445KA59 NAC domain-containing protein 104 isoform A n=2 Tax=Soja TaxID=1462606 RepID=A0A445KA59_GLYSO
Glyma.06G111800	34.114	1.64039	0.362235	5.26564e-07	4.15874e-06	UniRef100_A0A0B2PNB9 WAT1-related protein n=1 Tax=Glycine soja TaxID=3848 RepID=A0A0B2PNB9_GLYSO
Glyma.14G078600	1899.42	1.63929	0.076776	3.24475e-102	7.56068e-100	UniRef100_A0A445H309 Allene oxide synthase 1, chloroplastic isoform A n=3 Tax=Soja TaxID=1462606 RepID=A0A445H309_GLYSO
Glyma.16G055200	20.6693	1.63662	0.485894	6.31831e-05	0.000352104	UniRef100_A0A0B2R2L2 Uncharacterized protein n=2 Tax=Soja TaxID=1462606 RepID=A0A0B2R2L2_GLYSO
Glyma.12G208900	33.4797	1.63608	0.409991	5.57349e-06	3.76962e-05	UniRef100_I1LUL0 Uncharacterized protein n=2 Tax=Soja TaxID=1462606 RepID=I1LUL0_SOYBN
Glyma.07G260700	31.3847	1.63407	0.381052	1.55524e-06	1.14587e-05	UniRef100_A0A445K1T0 Uncharacterized protein n=3 Tax=Soja TaxID=1462606 RepID=A0A445K1T0_GLYSO
Glyma.02G175700	12.4988	1.63328	0.648708	0.000849212	0.00371499	UniRef100_I1JG31 BHLH domain-containing protein n=2 Tax=Soja TaxID=1462606 RepID=I1JG31_SOYBN
Glyma.08G230400	345.379	1.63324	0.157443	2.76965e-26	8.78238e-25	UniRef100_A0A445JIZ0 MLP-like protein 43 isoform A n=2 Tax=Soja TaxID=1462606 RepID=A0A445JIZ0_GLYSO
Glyma.04G206100	161.291	1.63012	0.181531	2.70113e-20	6.41398e-19	UniRef100_K7KLC0 Phosphatidylinositol 4-phosphate 5-kinase n=2 Tax=Soja TaxID=1462606 RepID=K7KLC0_SOYBN
Glyma.20G111600	853	1.62968	0.0883583	5.10907e-77	7.12449e-75	UniRef100_C6SX77 Uncharacterized protein n=1 Tax=Glycine max TaxID=3847 RepID=C6SX77_SOYBN
Glyma.03G088300	41.3933	1.62509	0.337212	1.22439e-07	1.06123e-06	UniRef100_A0A445LA53 Uncharacterized protein (Fragment) n=1 Tax=Glycine soja TaxID=3848 RepID=A0A445LA53_GLYSO
Glyma.19G207300	27.5947	1.62507	0.425656	1.07732e-05	6.95436e-05	UniRef100_C6SW47 Glutaredoxin domain-containing protein n=2 Tax=Soja TaxID=1462606 RepID=C6SW47_SOYBN
Glyma.13G051500	347.57	1.62487	0.12622	5.34229e-39	2.89277e-37	UniRef100_K7LXQ1 Hydrolase_4 domain-containing protein n=1 Tax=Glycine max TaxID=3847 RepID=K7LXQ1_SOYBN
Glyma.20G199800	29.0264	1.62478	0.394359	3.3105e-06	2.33253e-05	UniRef100_I1NHZ1 TPR_REGION domain-containing protein n=2 Tax=Soja TaxID=1462606 RepID=I1NHZ1_SOYBN
Glyma.02G130200	96.413	1.62467	0.223373	3.31633e-14	5.37594e-13	UniRef100_A0A0B2PJH6 PHO1 n=2 Tax=Soja TaxID=1462606 RepID=A0A0B2PJH6_GLYSO
Glyma.06G064000	13.1448	1.62454	0.652914	0.000836474	0.00366682	UniRef100_I1K8Q2 AP2/ERF domain-containing protein n=1 Tax=Glycine max TaxID=3847 RepID=I1K8Q2_SOYBN
Glyma.15G258100	28.5626	1.62422	0.410023	6.73961e-06	4.50845e-05	UniRef100_C6TJL6 LOB domain-containing protein n=2 Tax=Soja TaxID=1462606 RepID=C6TJL6_SOYBN
Glyma.08G193900	215.773	1.62223	0.152189	1.61157e-27	5.46525e-26	UniRef100_A0A0R0IYQ0 Uncharacterized protein n=3 Tax=Soja TaxID=1462606 RepID=A0A0R0IYQ0_SOYBN
Glyma.08G178000	87.1864	1.62181	0.251207	9.31385e-12	1.25051e-10	UniRef100_I1KUC0 Uncharacterized protein n=1 Tax=Glycine max TaxID=3847 RepID=I1KUC0_SOYBN
Glyma.05G198900	58.5352	1.62173	0.315403	2.58016e-08	2.42046e-07	UniRef100_A0A0B2QBU0 Uncharacterized protein n=2 Tax=Soja TaxID=1462606 RepID=A0A0B2QBU0_GLYSO
Glyma.04G050700	24.7875	1.62152	0.470096	4.08644e-05	0.00023694	UniRef100_I1JTW1 Uncharacterized protein n=2 Tax=Soja TaxID=1462606 RepID=I1JTW1_SOYBN
Glyma.08G039200	1120.56	1.61965	0.0860262	4.53169e-80	6.73544e-78	UniRef100_I1KQ26 Aldedh domain-containing protein n=2 Tax=Soja TaxID=1462606 RepID=I1KQ26_SOYBN
Glyma.02G059200	31.7429	1.61965	0.382131	1.97637e-06	1.43681e-05	UniRef100_I1JCS9 MCU domain-containing protein n=3 Tax=Soja TaxID=1462606 RepID=I1JCS9_SOYBN
Glyma.03G224100	29.4822	1.61911	0.42272	1.04297e-05	6.75071e-05	UniRef100_UPI0003DEB5D8 ABC transporter B family member 11 isoform X1 n=1 Tax=Glycine max TaxID=3847 RepID=UPI0003DEB5D8
Glyma.03G111700	827.868	1.61861	0.094209	3.57134e-67	4.10783e-65	UniRef100_I1JMQ9 AP2-EREBP transcription factor n=2 Tax=Soja TaxID=1462606 RepID=I1JMQ9_SOYBN
Glyma.08G219000	10.7567	1.61598	0.724815	0.00163608	0.00664009	UniRef100_I1KVM7 N-acetyltransferase domain-containing protein n=2 Tax=Soja TaxID=1462606 RepID=I1KVM7_SOYBN
Glyma.17G244000	55.7406	1.61358	0.288832	2.25538e-09	2.39159e-08	UniRef100_I1MXQ7 Patatin n=2 Tax=Soja TaxID=1462606 RepID=I1MXQ7_SOYBN
Glyma.01G005100	102.219	1.61297	0.221651	3.68175e-14	5.93103e-13	UniRef100_A0A0B2P1T5 Inositol oxygenase 2 n=2 Tax=Soja TaxID=1462606 RepID=A0A0B2P1T5_GLYSO
Glyma.01G172500	45.2591	1.61295	0.32312	5.47654e-08	4.95357e-07	UniRef100_K7K4C7 Uncharacterized protein n=1 Tax=Glycine max TaxID=3847 RepID=K7K4C7_SOYBN
Glyma.19G127800	1377.76	1.61168	0.0890814	2.97928e-74	3.95598e-72	UniRef100_I1N8P6 TFIIS N-terminal domain-containing protein n=1 Tax=Glycine max TaxID=3847 RepID=I1N8P6_SOYBN
Glyma.05G140900	30.248	1.61131	0.415076	8.35492e-06	5.50145e-05	UniRef100_I1K3F0 Uncharacterized protein n=2 Tax=Glycine max TaxID=3847 RepID=I1K3F0_SOYBN
Glyma.03G067800	17.4411	1.61123	0.525319	0.000167082	0.000854748	UniRef100_A0A0R0KN10 Uncharacterized protein n=1 Tax=Glycine max TaxID=3847 RepID=A0A0R0KN10_SOYBN
Glyma.05G075100	183.119	1.61042	0.160647	1.11842e-24	3.32187e-23	UniRef100_K7KP23 Uncharacterized protein n=3 Tax=Soja TaxID=1462606 RepID=K7KP23_SOYBN
Glyma.12G199200	197.898	1.60924	0.156602	8.18064e-26	2.55588e-24	UniRef100_A0A0R0HI07 Uncharacterized protein n=2 Tax=Soja TaxID=1462606 RepID=A0A0R0HI07_SOYBN
Glyma.12G172300	164.637	1.6088	0.16905	1.96143e-22	5.20507e-21	UniRef100_A0A0R0HG12 Uncharacterized protein n=2 Tax=Soja TaxID=1462606 RepID=A0A0R0HG12_SOYBN
Glyma.06G025200	39.7363	1.60826	0.359644	6.95673e-07	5.41151e-06	UniRef100_A0A0R0JIT3 Cytokinin riboside 5'-monophosphate phosphoribohydrolase n=3 Tax=Soja TaxID=1462606 RepID=A0A0R0JIT3_SOYBN
Glyma.16G119500	14.9637	1.6071	0.607257	0.000565963	0.00259229	UniRef100_I1MMY5 Uncharacterized protein n=1 Tax=Glycine max TaxID=3847 RepID=I1MMY5_SOYBN
Glyma.13G305900	10.827	1.60623	0.711373	0.00167648	0.00678347	UniRef100_K7M2U5 Uncharacterized protein n=2 Tax=Soja TaxID=1462606 RepID=K7M2U5_SOYBN
Glyma.06G190100	61.2457	1.60545	0.270442	2.96821e-10	3.45259e-09	UniRef100_K7KVW4 Uncharacterized protein n=3 Tax=Soja TaxID=1462606 RepID=K7KVW4_SOYBN
Glyma.01G207950	14.4441	1.6054	0.606358	0.000601511	0.00273784	UniRef100_A0A0R0LEJ2 Uncharacterized protein n=1 Tax=Glycine max TaxID=3847 RepID=A0A0R0LEJ2_SOYBN
Glyma.08G180000	38.5705	1.60248	0.385192	2.48106e-06	1.77512e-05	UniRef100_I1KUE5 Chlorophyll a-b binding protein, chloroplastic n=2 Tax=Glycine max TaxID=3847 RepID=I1KUE5_SOYBN
Glyma.05G137800	41.1111	1.60177	0.3462	3.51423e-07	2.84709e-06	UniRef100_A0A0R0JV24 Fe2OG dioxygenase domain-containing protein n=1 Tax=Glycine max TaxID=3847 RepID=A0A0R0JV24_SOYBN
Glyma.07G053300	904.564	1.59945	0.0927615	1.2028e-67	1.40134e-65	UniRef100_A0A445JSQ7 Calcium-binding protein KIC isoform A n=2 Tax=Soja TaxID=1462606 RepID=A0A445JSQ7_GLYSO
Glyma.01G177400	46.5491	1.59851	0.306105	1.71665e-08	1.64457e-07	UniRef100_K7K4G6 BZIP domain-containing protein n=2 Tax=Glycine max TaxID=3847 RepID=K7K4G6_SOYBN
Glyma.02G101100	92.5614	1.59722	0.234082	7.64133e-13	1.1196e-11	UniRef100_UPI00071910E4 protein CHUP1, chloroplastic isoform X1 n=1 Tax=Glycine max TaxID=3847 RepID=UPI00071910E4
Glyma.11G056200	289.359	1.59702	0.142349	3.66665e-30	1.40284e-28	UniRef100_I1LHE9 HSF_DOMAIN domain-containing protein n=2 Tax=Soja TaxID=1462606 RepID=I1LHE9_SOYBN
Glyma.14G061200	1346.17	1.59634	0.0809647	1.26961e-87	2.1732e-85	UniRef100_I1M7W2 Uncharacterized protein n=1 Tax=Glycine max TaxID=3847 RepID=I1M7W2_SOYBN
Glyma.12G132000	83.7777	1.59473	0.24258	5.04124e-12	6.91247e-11	UniRef100_K7LUI6 TIR domain-containing protein n=1 Tax=Glycine max TaxID=3847 RepID=K7LUI6_SOYBN
Glyma.08G271600	1265.81	1.59444	0.10686	2.08738e-51	1.53232e-49	UniRef100_K7L977 Uncharacterized protein n=2 Tax=Soja TaxID=1462606 RepID=K7L977_SOYBN
Glyma.16G142100	86.2665	1.5928	0.230578	4.91386e-13	7.31248e-12	UniRef100_A0A0R0FQK7 MCU domain-containing protein n=2 Tax=Soja TaxID=1462606 RepID=A0A0R0FQK7_SOYBN
Glyma.20G220900	139.259	1.59256	0.193945	2.11786e-17	4.22601e-16	UniRef100_C6T5E1 Germin-like protein n=2 Tax=Soja TaxID=1462606 RepID=C6T5E1_SOYBN
Glyma.07G055000	158.219	1.58444	0.183779	7.00676e-19	1.52724e-17	UniRef100_I1KHU6 AP2/ERF domain-containing protein n=1 Tax=Glycine max TaxID=3847 RepID=I1KHU6_SOYBN
Glyma.14G145700	22.0231	1.58401	0.476173	7.09723e-05	0.000391106	UniRef100_K7M6T4 GATA transcription factor n=2 Tax=Soja TaxID=1462606 RepID=K7M6T4_SOYBN
Glyma.17G257200	54.7446	1.58359	0.284557	2.47903e-09	2.62029e-08	UniRef100_C6TLU1 Cytokinin riboside 5'-monophosphate phosphoribohydrolase n=4 Tax=Soja TaxID=1462606 RepID=C6TLU1_SOYBN
Glyma.16G208400	48.8927	1.58343	0.319962	7.17698e-08	6.39553e-07	UniRef100_K7MIS3 Chloride channel protein n=3 Tax=Glycine max TaxID=3847 RepID=K7MIS3_SOYBN
Glyma.03G261800	457.188	1.58098	0.130319	8.1966e-35	3.7808e-33	UniRef100_C0SNP2 Late elongated hypocotyl and circadian clock associated-1-like protein 2 n=1 Tax=Glycine max TaxID=3847 RepID=C0SNP2_SOYBN
Glyma.09G087400	317.986	1.57907	0.128301	8.2366e-36	3.98768e-34	UniRef100_I1L248 MFS domain-containing protein n=3 Tax=Soja TaxID=1462606 RepID=I1L248_SOYBN
Glyma.17G072400	128.526	1.57424	0.19926	2.53245e-16	4.76129e-15	UniRef100_A0A445G381 Heat shock 70 kDa protein isoform A n=2 Tax=Soja TaxID=1462606 RepID=A0A445G381_GLYSO
Glyma.03G205400	34.8009	1.5734	0.36007	1.1579e-06	8.70886e-06	UniRef100_I1JQC9 Abhydrolase_3 domain-containing protein n=2 Tax=Soja TaxID=1462606 RepID=I1JQC9_SOYBN
Glyma.04G223700	262.274	1.5706	0.136824	1.7317e-31	7.09917e-30	UniRef100_I1JYD1 AB hydrolase-1 domain-containing protein n=2 Tax=Glycine max TaxID=3847 RepID=I1JYD1_SOYBN
Glyma.15G263600	5230.87	1.56791	0.0676157	5.90079e-120	1.83723e-117	UniRef100_I1MJE2 Uncharacterized protein n=2 Tax=Soja TaxID=1462606 RepID=I1MJE2_SOYBN
Glyma.10G248600	693.777	1.56557	0.100227	4.39018e-56	3.67037e-54	UniRef100_K7LL99 CRAL-TRIO domain-containing protein n=2 Tax=Soja TaxID=1462606 RepID=K7LL99_SOYBN
Glyma.03G032400	106.908	1.56375	0.212209	1.67976e-14	2.78293e-13	UniRef100_K7KCK4 SPX domain-containing protein n=1 Tax=Glycine max TaxID=3847 RepID=K7KCK4_SOYBN
Glyma.06G058400	14.268	1.56334	0.587477	0.000587501	0.00268015	UniRef100_A0A0B2RYF7 Ethylene-responsive transcription factor ERF018 n=2 Tax=Soja TaxID=1462606 RepID=A0A0B2RYF7_GLYSO
Glyma.12G092900	22.7143	1.55743	0.479574	9.78197e-05	0.000524099	UniRef100_A0A0R0H3D0 Uncharacterized protein n=2 Tax=Soja TaxID=1462606 RepID=A0A0R0H3D0_SOYBN
Glyma.08G158100	2228.38	1.55634	0.0698918	6.7927e-111	1.76498e-108	UniRef100_A0A0B2QTN5 Uncharacterized protein n=2 Tax=Soja TaxID=1462606 RepID=A0A0B2QTN5_GLYSO
Glyma.12G008400	236.452	1.55571	0.147622	5.71871e-27	1.88451e-25	UniRef100_K7LSC4 Uncharacterized protein n=2 Tax=Soja TaxID=1462606 RepID=K7LSC4_SOYBN
Glyma.01G205900	1890.7	1.55393	0.0720221	3.30891e-104	8.02066e-102	UniRef100_I1J9S3 Lipase_3 domain-containing protein n=2 Tax=Soja TaxID=1462606 RepID=I1J9S3_SOYBN
Glyma.15G089900	13.6264	1.55372	0.61995	0.000886256	0.00385649	UniRef100_A0A445GR86 Serine hydroxymethyltransferase n=1 Tax=Glycine soja TaxID=3848 RepID=A0A445GR86_GLYSO
Glyma.15G235000	129.072	1.5532	0.1882	1.57404e-17	3.16535e-16	UniRef100_I1MIQ8 Uncharacterized protein n=1 Tax=Glycine max TaxID=3847 RepID=I1MIQ8_SOYBN
Glyma.07G032700	32.3948	1.55309	0.38119	4.04325e-06	2.80127e-05	UniRef100_I1KH42 Abhydrolase_2 domain-containing protein n=1 Tax=Glycine max TaxID=3847 RepID=I1KH42_SOYBN
Glyma.08G261200	96.2975	1.55295	0.229784	1.42398e-12	2.03843e-11	UniRef100_A0A0B2RKJ3 Homocysteine S-methyltransferase 1 n=2 Tax=Soja TaxID=1462606 RepID=A0A0B2RKJ3_GLYSO
Glyma.07G262500	149.529	1.55225	0.19468	1.59345e-16	3.02103e-15	UniRef100_I1KNF9 Uncharacterized protein n=2 Tax=Soja TaxID=1462606 RepID=I1KNF9_SOYBN
Glyma.07G076600	390.439	1.54947	0.1267	2.07867e-35	9.86536e-34	UniRef100_A0A0R0J6T9 C2 domain-containing protein n=1 Tax=Glycine max TaxID=3847 RepID=A0A0R0J6T9_SOYBN
Glyma.06G057200	201.189	1.54894	0.160368	4.81304e-23	1.32697e-21	UniRef100_I1K8H7 AB hydrolase-1 domain-containing protein n=2 Tax=Soja TaxID=1462606 RepID=I1K8H7_SOYBN
Glyma.15G067100	275.52	1.54826	0.13594	5.03649e-31	2.03699e-29	UniRef100_I1ME96 MSP domain-containing protein n=1 Tax=Glycine max TaxID=3847 RepID=I1ME96_SOYBN
Glyma.13G032700	245.884	1.54706	0.140817	5.0777e-29	1.84313e-27	UniRef100_K7LY58 Protein kinase domain-containing protein n=2 Tax=Soja TaxID=1462606 RepID=K7LY58_SOYBN
Glyma.09G079900	358.983	1.54306	0.128284	2.49863e-34	1.13656e-32	UniRef100_A0A445IYB9 Aspartic proteinase A1 isoform A n=5 Tax=Soja TaxID=1462606 RepID=A0A445IYB9_GLYSO
Glyma.07G019700	12.0511	1.543	0.682092	0.00166713	0.00675248	UniRef100_A0A371GDC7 Photosystem I reaction center subunit VI-2, chloroplastic n=1 Tax=Mucuna pruriens TaxID=157652 RepID=A0A371GDC7_MUCPR
Glyma.07G147200	16.755	1.54293	0.5543	0.000420808	0.00198076	UniRef100_I1KKB9 Uncharacterized protein n=1 Tax=Glycine max TaxID=3847 RepID=I1KKB9_SOYBN
Glyma.19G108800	666.484	1.54095	0.10153	4.94791e-53	3.77809e-51	UniRef100_A0A0B2PKC6 NAC domain-containing protein 29 n=2 Tax=Soja TaxID=1462606 RepID=A0A0B2PKC6_GLYSO
Glyma.11G239300	644.355	1.54095	0.0932401	2.56763e-62	2.54069e-60	UniRef100_I1LNL8 Trehalose 6-phosphate phosphatase n=2 Tax=Soja TaxID=1462606 RepID=I1LNL8_SOYBN
Glyma.13G303800	79.2599	1.53687	0.28276	4.80765e-09	4.91752e-08	UniRef100_K7M2T9 Uncharacterized protein n=1 Tax=Glycine max TaxID=3847 RepID=K7M2T9_SOYBN
Glyma.17G171000	16.0416	1.53678	0.578424	0.000605392	0.00275447	UniRef100_A0A445G7W8 Caffeoyl-CoA O-methyltransferase isoform F n=2 Tax=Soja TaxID=1462606 RepID=A0A445G7W8_GLYSO
Glyma.07G201800	14.463	1.53498	0.635333	0.00117014	0.00494118	UniRef100_A0A0B2Q6P9 NAC domain-containing protein 73 isoform A n=2 Tax=Soja TaxID=1462606 RepID=A0A0B2Q6P9_GLYSO
Glyma.10G276000	37.4675	1.53369	0.392622	8.857e-06	5.80665e-05	UniRef100_I1LEY3 Uncharacterized protein n=1 Tax=Glycine max TaxID=3847 RepID=I1LEY3_SOYBN
Glyma.13G239500	115.188	1.53169	0.197793	1.03494e-15	1.87457e-14	UniRef100_A0A445I950 E3 ubiquitin-protein ligase RMA1H1 isoform A n=2 Tax=Soja TaxID=1462606 RepID=A0A445I950_GLYSO
Glyma.16G054400	214.994	1.52931	0.154169	3.40119e-24	9.90653e-23	UniRef100_A0A368UGZ1 WRKY domain-containing protein n=2 Tax=Soja TaxID=1462606 RepID=A0A368UGZ1_SOYBN
Glyma.05G160500	718.176	1.52807	0.0940834	2.57896e-60	2.40063e-58	UniRef100_I1K414 Uncharacterized protein n=1 Tax=Glycine max TaxID=3847 RepID=I1K414_SOYBN
Glyma.19G018700	138.742	1.52798	0.185209	1.66941e-17	3.35152e-16	UniRef100_A0A0B2RQX0 AAA-ATPase ASD, mitochondrial isoform B n=2 Tax=Soja TaxID=1462606 RepID=A0A0B2RQX0_GLYSO
Glyma.15G036600	13.4555	1.52614	0.623928	0.0010532	0.0045016	UniRef100_A0A0R0G504 Uncharacterized protein n=2 Tax=Soja TaxID=1462606 RepID=A0A0R0G504_SOYBN
Glyma.06G037100	339.527	1.52405	0.130098	1.19129e-32	5.14046e-31	UniRef100_I1K7X3 Uncharacterized protein n=4 Tax=Soja TaxID=1462606 RepID=I1K7X3_SOYBN
Glyma.11G074850	42.0684	1.52398	0.326103	2.81555e-07	2.31269e-06	NA
Glyma.08G013000	71.0968	1.52212	0.279278	5.33364e-09	5.41718e-08	UniRef100_I1KP86 C2 NT-type domain-containing protein n=2 Tax=Soja TaxID=1462606 RepID=I1KP86_SOYBN
Glyma.07G009100	118.674	1.52198	0.199777	2.74386e-15	4.83414e-14	UniRef100_A0A445JQH4 Protein indeterminate-domain 11 isoform A n=2 Tax=Soja TaxID=1462606 RepID=A0A445JQH4_GLYSO
Glyma.13G093500	285.433	1.52186	0.134141	8.10901e-31	3.2326e-29	UniRef100_K7LWX0 Uncharacterized protein n=3 Tax=Soja TaxID=1462606 RepID=K7LWX0_SOYBN
Glyma.04G061500	85.8599	1.5204	0.24691	8.06372e-11	9.90941e-10	UniRef100_A0A445KWB4 Non-specific serine/threonine protein kinase n=1 Tax=Glycine soja TaxID=3848 RepID=A0A445KWB4_GLYSO
Glyma.02G237300	57.7531	1.51991	0.283195	7.72944e-09	7.70533e-08	UniRef100_UPI00103E13B9 probable LRR receptor-like serine/threonine-protein kinase At1g06840 isoform X1 n=1 Tax=Glycine soja TaxID=3848 RepID=UPI00103E13B9
Glyma.15G209300	544.077	1.51957	0.13505	4.03052e-30	1.53393e-28	UniRef100_C6FF63 Leucine-rich repeat protein n=1 Tax=Glycine max TaxID=3847 RepID=C6FF63_SOYBN
Glyma.11G038600	3204.79	1.51953	0.0650635	1.32765e-121	4.31989e-119	UniRef100_C6SYY4 Tify domain-containing protein n=2 Tax=Glycine max TaxID=3847 RepID=C6SYY4_SOYBN
Glyma.11G048300	6020.38	1.51767	0.0593073	1.84695e-145	8.89417e-143	UniRef100_A0A0B2PV13 Calcium-transporting ATPase n=5 Tax=Soja TaxID=1462606 RepID=A0A0B2PV13_GLYSO
Glyma.07G151100	68.0319	1.51635	0.257596	3.8623e-10	4.45386e-09	UniRef100_I1KKF8 Myb-like domain-containing protein n=3 Tax=Soja TaxID=1462606 RepID=I1KKF8_SOYBN
Glyma.12G197900	52.2375	1.51634	0.307699	7.67606e-08	6.81673e-07	UniRef100_A0A0B2R0J1 Calcium-binding protein KIC n=2 Tax=Soja TaxID=1462606 RepID=A0A0B2R0J1_GLYSO
Glyma.20G027200	38.1452	1.51628	0.347685	1.20339e-06	9.01906e-06	UniRef100_I1NDJ4 Uncharacterized protein n=1 Tax=Glycine max TaxID=3847 RepID=I1NDJ4_SOYBN
Glyma.02G264800	66.0196	1.51609	0.255773	3.19369e-10	3.70412e-09	UniRef100_I1JIG0 RING-type domain-containing protein n=2 Tax=Soja TaxID=1462606 RepID=I1JIG0_SOYBN
Glyma.17G233700	2918.69	1.51553	0.0742932	1.77401e-93	3.40808e-91	UniRef100_I1MXG5 Uncharacterized protein n=2 Tax=Soja TaxID=1462606 RepID=I1MXG5_SOYBN
Glyma.06G179800	16.1652	1.51526	0.580393	0.000677094	0.00303708	UniRef100_I1KCD5 Uncharacterized protein n=1 Tax=Glycine max TaxID=3847 RepID=I1KCD5_SOYBN
Glyma.11G048600	38.1307	1.51403	0.349755	1.46087e-06	1.08075e-05	UniRef100_I1LH70 Formin-like protein n=2 Tax=Soja TaxID=1462606 RepID=I1LH70_SOYBN
Glyma.18G242700	2249.43	1.51256	0.0661447	1.14917e-116	3.24253e-114	UniRef100_I1N3Z6 PPM-type phosphatase domain-containing protein n=3 Tax=Soja TaxID=1462606 RepID=I1N3Z6_SOYBN
Glyma.01G241000	128.638	1.51045	0.208268	4.6802e-14	7.47279e-13	UniRef100_A0A0B2RF01 Cysteine-rich receptor-like protein kinase 10 n=3 Tax=Soja TaxID=1462606 RepID=A0A0B2RF01_GLYSO
Glyma.19G209500	107.607	1.51032	0.21363	1.52658e-13	2.35722e-12	UniRef100_I1NB42 HMA domain-containing protein n=2 Tax=Soja TaxID=1462606 RepID=I1NB42_SOYBN
Glyma.16G043200	3367.98	1.50954	0.0675794	1.5378e-111	4.05406e-109	UniRef100_I1ML43 NAC domain-containing protein n=2 Tax=Soja TaxID=1462606 RepID=I1ML43_SOYBN
Glyma.13G345100	16.914	1.50872	0.592148	0.000842925	0.00369196	UniRef100_I1M570 Str_synth domain-containing protein n=2 Tax=Soja TaxID=1462606 RepID=I1M570_SOYBN
Glyma.06G294100	17.6026	1.50817	0.520012	0.000311211	0.00150247	UniRef100_I1KF26 ANK_REP_REGION domain-containing protein n=1 Tax=Glycine max TaxID=3847 RepID=I1KF26_SOYBN
Glyma.19G077300	16.9905	1.5071	0.52873	0.00036011	0.0017163	UniRef100_A0A0B2RCC8 Glucose-6-phosphate 1-dehydrogenase n=2 Tax=Soja TaxID=1462606 RepID=A0A0B2RCC8_GLYSO
Glyma.09G013100	26.6749	1.50421	0.452189	7.71873e-05	0.00042156	UniRef100_K7LB86 Uncharacterized protein n=2 Tax=Soja TaxID=1462606 RepID=K7LB86_SOYBN
Glyma.06G085700	181.981	1.50356	0.170498	1.32291e-19	3.02977e-18	UniRef100_C9WA59 AP2 domain-containing transcription factor 1 n=2 Tax=Soja TaxID=1462606 RepID=C9WA59_SOYBN
Glyma.10G296600	267.421	1.5033	0.150384	1.74026e-24	5.12668e-23	UniRef100_A0A445IUV4 Protein NRT1/ PTR FAMILY 7.1 isoform B n=3 Tax=Glycine soja TaxID=3848 RepID=A0A445IUV4_GLYSO
Glyma.07G148500	19.8706	1.50245	0.501914	0.000239685	0.00118682	UniRef100_A0A0B2QSY9 Cold-responsive protein kinase 1 isoform A n=2 Tax=Soja TaxID=1462606 RepID=A0A0B2QSY9_GLYSO
Glyma.04G150400	402.749	1.501	0.24994	1.77434e-10	2.11568e-09	UniRef100_K7KK28 F-box domain-containing protein n=3 Tax=Soja TaxID=1462606 RepID=K7KK28_SOYBN
Glyma.13G231900	436.094	1.50072	0.121093	3.30898e-36	1.63043e-34	UniRef100_C6SZV3 Uncharacterized protein n=2 Tax=Soja TaxID=1462606 RepID=C6SZV3_SOYBN
Glyma.03G204100	391.796	1.49951	0.131742	4.91462e-31	1.98993e-29	UniRef100_K7KG55 Uncharacterized protein n=1 Tax=Glycine max TaxID=3847 RepID=K7KG55_SOYBN
Glyma.05G068400	822.829	1.49551	0.0931964	5.72225e-59	5.14106e-57	UniRef100_UPI0003DEB43B BOI-related E3 ubiquitin-protein ligase 1 isoform X1 n=1 Tax=Glycine max TaxID=3847 RepID=UPI0003DEB43B
Glyma.04G050300	1650.28	1.49497	0.0872668	8.98547e-67	1.00785e-64	UniRef100_I1JTV7 Uncharacterized protein n=1 Tax=Glycine max TaxID=3847 RepID=I1JTV7_SOYBN
Glyma.08G072300	24.9343	1.49408	0.43106	4.61792e-05	0.000265118	UniRef100_Q7XZQ0 Ubiquinol oxidase n=1 Tax=Glycine max TaxID=3847 RepID=Q7XZQ0_SOYBN
Glyma.15G105500	373.358	1.49357	0.129565	1.03323e-31	4.27951e-30	UniRef100_C6T2T0 Uncharacterized protein n=2 Tax=Soja TaxID=1462606 RepID=C6T2T0_SOYBN
Glyma.07G226633	19.9916	1.49138	0.499805	0.000229238	0.00113994	UniRef100_A0A445K0C8 Nodulin-related protein 1 n=2 Tax=Soja TaxID=1462606 RepID=A0A445K0C8_GLYSO
Glyma.11G050900	78.1323	1.49045	0.236749	3.20949e-11	4.11345e-10	UniRef100_A0A0B2PYY4 PPM-type phosphatase domain-containing protein n=2 Tax=Soja TaxID=1462606 RepID=A0A0B2PYY4_GLYSO
Glyma.20G066800	162.196	1.4902	0.178441	6.17757e-18	1.26987e-16	UniRef100_K7N1Y1 Uncharacterized protein n=2 Tax=Soja TaxID=1462606 RepID=K7N1Y1_SOYBN
Glyma.15G072600	297.895	1.4879	0.132623	3.91505e-30	1.49471e-28	UniRef100_A0A445GQL3 CBS domain-containing protein CBSX5 n=1 Tax=Glycine soja TaxID=3848 RepID=A0A445GQL3_GLYSO
Glyma.13G183600	1185.3	1.48624	0.0799211	3.43886e-78	4.88982e-76	UniRef100_A0A368UHD2 Uncharacterized protein n=1 Tax=Glycine max TaxID=3847 RepID=A0A368UHD2_SOYBN
Glyma.08G230500	1090.88	1.48508	0.108548	1.4112e-43	8.49471e-42	UniRef100_C6SXD0 Bet_v_1 domain-containing protein n=2 Tax=Soja TaxID=1462606 RepID=C6SXD0_SOYBN
Glyma.17G224000	20.6553	1.48354	0.508259	0.000280036	0.00136437	UniRef100_K7MND7 Uncharacterized protein n=2 Tax=Soja TaxID=1462606 RepID=K7MND7_SOYBN
Glyma.17G155900	50.2514	1.48256	0.295192	5.27995e-08	4.78294e-07	UniRef100_I1MVF8 BHLH transcription factor n=2 Tax=Glycine max TaxID=3847 RepID=I1MVF8_SOYBN
Glyma.13G259500	56.4246	1.4825	0.283891	1.78013e-08	1.70177e-07	UniRef100_A0A0B2SLB0 Gibberellin 2-beta-dioxygenase 1 n=3 Tax=Soja TaxID=1462606 RepID=A0A0B2SLB0_GLYSO
Glyma.15G268200	2306.95	1.48189	0.0786646	3.26889e-80	4.91927e-78	UniRef100_A0A0R0G6Q0 Uncharacterized protein n=1 Tax=Glycine max TaxID=3847 RepID=A0A0R0G6Q0_SOYBN
Glyma.11G036900	186.66	1.4784	0.173619	1.89803e-18	4.0348e-17	UniRef100_I1LGT9 Lipase_3 domain-containing protein n=2 Tax=Soja TaxID=1462606 RepID=I1LGT9_SOYBN
Glyma.05G138400	218.507	1.47799	0.150444	1.02916e-23	2.92448e-22	UniRef100_C6TKR1 Purple acid phosphatase n=1 Tax=Glycine max TaxID=3847 RepID=C6TKR1_SOYBN
Glyma.14G040000	21.4383	1.47708	0.479085	0.000174562	0.000888858	UniRef100_A0A0B2R163 Protein kinase 2A, chloroplastic n=2 Tax=Soja TaxID=1462606 RepID=A0A0B2R163_GLYSO
Glyma.08G158500	45.3094	1.47668	0.323027	4.82532e-07	3.83024e-06	UniRef100_A0A0B2QMD2 Uncharacterized protein n=2 Tax=Soja TaxID=1462606 RepID=A0A0B2QMD2_GLYSO
Glyma.03G204900	123.595	1.47606	0.208936	1.49075e-13	2.30387e-12	UniRef100_I1JQC4 VQ domain-containing protein n=1 Tax=Glycine max TaxID=3847 RepID=I1JQC4_SOYBN
Glyma.17G110300	85.1628	1.47365	0.236392	4.96772e-11	6.26245e-10	UniRef100_K7ML22 Exostosin domain-containing protein n=3 Tax=Soja TaxID=1462606 RepID=K7ML22_SOYBN
Glyma.11G250700	575.983	1.47356	0.109015	1.50081e-42	8.72864e-41	UniRef100_I1LN78 Uncharacterized protein n=2 Tax=Soja TaxID=1462606 RepID=I1LN78_SOYBN
Glyma.04G025300	108.698	1.4716	0.238497	6.84838e-11	8.49392e-10	UniRef100_A0A0B2SLP0 Auxin-responsive protein SAUR50 n=2 Tax=Soja TaxID=1462606 RepID=A0A0B2SLP0_GLYSO
Glyma.09G034300	21.2928	1.47145	0.484397	0.000204397	0.00102726	UniRef100_I1L0P8 WRKY domain-containing protein n=1 Tax=Glycine max TaxID=3847 RepID=I1L0P8_SOYBN
Glyma.06G005300	41.9781	1.47011	0.354906	2.95203e-06	2.09343e-05	UniRef100_K7KSB4 Uncharacterized protein n=1 Tax=Glycine max TaxID=3847 RepID=K7KSB4_SOYBN
Glyma.04G230500	17.0949	1.46946	0.552057	0.000648275	0.00292562	UniRef100_I1JYK3 Protein kinase domain-containing protein n=3 Tax=Soja TaxID=1462606 RepID=I1JYK3_SOYBN
Glyma.18G225100	1380.4	1.46804	0.101904	5.53058e-48	3.79749e-46	UniRef100_I1N3I2 Uncharacterized protein n=1 Tax=Glycine max TaxID=3847 RepID=I1N3I2_SOYBN
Glyma.06G110700	279.563	1.46693	0.147466	3.17233e-24	9.25486e-23	UniRef100_A0A0R0JNK4 Receptor-like serine/threonine-protein kinase n=2 Tax=Glycine max TaxID=3847 RepID=A0A0R0JNK4_SOYBN
Glyma.12G032900	611.327	1.46577	0.103562	1.85646e-46	1.20161e-44	UniRef100_K7LSU1 Protein kinase domain-containing protein n=1 Tax=Glycine max TaxID=3847 RepID=K7LSU1_SOYBN
Glyma.U031116	161.405	1.46514	0.215733	1.14338e-12	1.64787e-11	UniRef100_A0A0R0HRB1 Uncharacterized protein n=1 Tax=Glycine max TaxID=3847 RepID=A0A0R0HRB1_SOYBN
Glyma.02G080200	738.873	1.46422	0.0931285	1.15394e-56	9.80631e-55	UniRef100_K7K715 AP2/ERF domain-containing protein n=2 Tax=Soja TaxID=1462606 RepID=K7K715_SOYBN
Glyma.20G199700	35.5678	1.45966	0.383055	1.36932e-05	8.65772e-05	UniRef100_K7N4L6 C2 domain-containing protein n=1 Tax=Glycine max TaxID=3847 RepID=K7N4L6_SOYBN
Glyma.01G135500	48.9771	1.4551	0.298725	1.16015e-07	1.00772e-06	UniRef100_K7K3P1 SPX domain-containing protein n=3 Tax=Soja TaxID=1462606 RepID=K7K3P1_SOYBN
Glyma.03G246100	267.952	1.45493	0.169448	8.49522e-19	1.84388e-17	UniRef100_A0A0B2RA90 Serine/threonine-protein kinase Nek2 n=2 Tax=Soja TaxID=1462606 RepID=A0A0B2RA90_GLYSO
Glyma.12G119200	1713.77	1.45466	0.0798683	4.06518e-75	5.47844e-73	UniRef100_C6T0K0 Glutaredoxin domain-containing protein n=2 Tax=Soja TaxID=1462606 RepID=C6T0K0_SOYBN
Glyma.20G214200	530.526	1.45448	0.106388	1.43022e-43	8.59486e-42	UniRef100_A0A0R0EQP6 Peroxidase n=2 Tax=Soja TaxID=1462606 RepID=A0A0R0EQP6_SOYBN
Glyma.13G337200	29.625	1.4536	0.434618	6.97641e-05	0.000384741	UniRef100_I1M4X6 GRAS domain-containing protein n=1 Tax=Glycine max TaxID=3847 RepID=I1M4X6_SOYBN
Glyma.09G144700	16.0755	1.45332	0.598303	0.0011022	0.00468219	UniRef100_K7LDY1 Fe2OG dioxygenase domain-containing protein n=2 Tax=Soja TaxID=1462606 RepID=K7LDY1_SOYBN
Glyma.18G080300	39.6514	1.45258	0.33456	1.42685e-06	1.05797e-05	UniRef100_A0A0B2PHC1 Cytochrome P450 71D10 n=2 Tax=Soja TaxID=1462606 RepID=A0A0B2PHC1_GLYSO
Glyma.06G194900	13.4505	1.45184	0.625433	0.00154727	0.00631943	UniRef100_A0A445KC47 Chlorophyll a-b binding protein, chloroplastic n=4 Tax=Soja TaxID=1462606 RepID=A0A445KC47_GLYSO
Glyma.03G222400	794.014	1.45163	0.089617	5.27345e-60	4.88362e-58	UniRef100_I1JQV2 Uncharacterized protein n=2 Tax=Glycine max TaxID=3847 RepID=I1JQV2_SOYBN
Glyma.09G123700	14.9616	1.45144	0.579469	0.000952341	0.00410989	UniRef100_I1L2W5 Uncharacterized protein n=1 Tax=Glycine max TaxID=3847 RepID=I1L2W5_SOYBN
Glyma.18G140300	22.0038	1.44939	0.464931	0.000156706	0.000806235	UniRef100_I1N1I2 Uncharacterized protein n=2 Tax=Glycine max TaxID=3847 RepID=I1N1I2_SOYBN
Glyma.07G256700	1097.16	1.44863	0.0789628	3.67852e-76	5.0516e-74	UniRef100_K7L3U8 Uncharacterized protein n=2 Tax=Soja TaxID=1462606 RepID=K7L3U8_SOYBN
Glyma.14G070500	254.31	1.44684	0.139557	3.93801e-26	1.24326e-24	UniRef100_I1M877 Thioredoxin n=2 Tax=Soja TaxID=1462606 RepID=I1M877_SOYBN
Glyma.19G117200	15.8688	1.44682	0.660374	0.00188765	0.0075333	UniRef100_I1N8E1 Uncharacterized protein n=2 Tax=Glycine max TaxID=3847 RepID=I1N8E1_SOYBN
Glyma.10G204200	306.68	1.44475	0.12879	3.67729e-30	1.40542e-28	UniRef100_I1LCS9 MYB/HD-like transcription factor n=1 Tax=Glycine max TaxID=3847 RepID=I1LCS9_SOYBN
Glyma.07G069000	1579.43	1.44212	0.0868264	6.226e-63	6.29873e-61	UniRef100_K7L050 Receptor-like serine/threonine-protein kinase n=1 Tax=Glycine max TaxID=3847 RepID=K7L050_SOYBN
Glyma.09G060700	757.362	1.43992	0.105595	2.51671e-43	1.49746e-41	UniRef100_I1L1F0 Uncharacterized protein n=1 Tax=Glycine max TaxID=3847 RepID=I1L1F0_SOYBN
Glyma.16G210500	165.782	1.4399	0.16353	1.40888e-19	3.22054e-18	UniRef100_K7MIT5 Protein kinase domain-containing protein n=2 Tax=Soja TaxID=1462606 RepID=K7MIT5_SOYBN
Glyma.03G061200	66.0424	1.43752	0.259884	3.28496e-09	3.41714e-08	UniRef100_K7KD74 Uncharacterized protein n=2 Tax=Soja TaxID=1462606 RepID=K7KD74_SOYBN
Glyma.14G023500	44.8541	1.43551	0.311445	4.21292e-07	3.37379e-06	UniRef100_I1M6R1 Uncharacterized protein n=2 Tax=Soja TaxID=1462606 RepID=I1M6R1_SOYBN
Glyma.19G140400	33.0241	1.43412	0.372979	1.14046e-05	7.32658e-05	UniRef100_A0A0B2QXE1 Zinc finger AN1 and C2H2 domain-containing stress-associated protein 16 n=2 Tax=Soja TaxID=1462606 RepID=A0A0B2QXE1_GLYSO
Glyma.16G039800	1473.91	1.43382	0.0890515	2.47134e-59	2.24265e-57	UniRef100_K7MF41 Uncharacterized protein n=1 Tax=Glycine max TaxID=3847 RepID=K7MF41_SOYBN
Glyma.14G084700	223.386	1.4335	0.149332	9.15529e-23	2.47687e-21	UniRef100_Q7Y0Y9 AP2-EREBP transcription factor n=2 Tax=Soja TaxID=1462606 RepID=Q7Y0Y9_SOYBN
Glyma.20G179800	23.2228	1.43256	0.454791	0.00014125	0.00073509	UniRef100_I1NHF9 N-acetyltransferase domain-containing protein n=2 Tax=Soja TaxID=1462606 RepID=I1NHF9_SOYBN
Glyma.14G080100	424.853	1.43214	0.115929	5.29046e-36	2.5821e-34	UniRef100_K7M5K0 Protein kinase domain-containing protein n=1 Tax=Glycine max TaxID=3847 RepID=K7M5K0_SOYBN
Glyma.08G140900	37.1337	1.43158	0.349698	3.9692e-06	2.75472e-05	UniRef100_I1KT88 ABC1 domain-containing protein n=3 Tax=Soja TaxID=1462606 RepID=I1KT88_SOYBN
Glyma.06G294400	63.351	1.42988	0.27104	1.30688e-08	1.26917e-07	UniRef100_K7KY44 ANK_REP_REGION domain-containing protein n=1 Tax=Glycine max TaxID=3847 RepID=K7KY44_SOYBN
Glyma.11G129900	2395.4	1.42971	0.0686288	2.24624e-97	4.7167e-95	UniRef100_I1LJS4 Uncharacterized protein n=2 Tax=Soja TaxID=1462606 RepID=I1LJS4_SOYBN
Glyma.05G162800	13.1383	1.42923	0.644664	0.00191368	0.00762284	UniRef100_I1K437 Protein kinase domain-containing protein n=2 Tax=Glycine max TaxID=3847 RepID=I1K437_SOYBN
Glyma.17G086800	50.0816	1.42872	0.301094	2.13321e-07	1.78718e-06	UniRef100_I1MTE5 Uncharacterized protein n=2 Tax=Soja TaxID=1462606 RepID=I1MTE5_SOYBN
Glyma.18G268500	64.1524	1.42828	0.305129	2.83325e-07	2.32617e-06	UniRef100_I1N4L5 Uncharacterized protein n=1 Tax=Glycine max TaxID=3847 RepID=I1N4L5_SOYBN
Glyma.07G146300	37.7821	1.42815	0.353041	5.30905e-06	3.60202e-05	UniRef100_A0A0B2QRH7 Transcription factor DIVARICATA n=2 Tax=Soja TaxID=1462606 RepID=A0A0B2QRH7_GLYSO
Glyma.10G256100	236.445	1.42689	0.151991	7.09377e-22	1.82353e-20	UniRef100_A0A0R0I5Y8 Uncharacterized protein n=1 Tax=Glycine max TaxID=3847 RepID=A0A0R0I5Y8_SOYBN
Glyma.09G118300	64.3895	1.42617	0.306521	3.12591e-07	2.5485e-06	UniRef100_A0A0B2RW17 MLP-like protein 43 n=2 Tax=Soja TaxID=1462606 RepID=A0A0B2RW17_GLYSO
Glyma.01G195300	297.436	1.4258	0.147634	5.30454e-23	1.45913e-21	UniRef100_I1J9G2 VQ domain-containing protein n=1 Tax=Glycine max TaxID=3847 RepID=I1J9G2_SOYBN
Glyma.05G138267	13.283	1.42447	0.638229	0.00182165	0.00730291	UniRef100_K7KQ43 Purple acid phosphatase n=1 Tax=Glycine max TaxID=3847 RepID=K7KQ43_SOYBN
Glyma.13G033900	202.219	1.42409	0.158802	2.93681e-20	6.95989e-19	UniRef100_I1LXE1 Protein kinase domain-containing protein n=2 Tax=Soja TaxID=1462606 RepID=I1LXE1_SOYBN
Glyma.13G097300	92.8473	1.42269	0.223555	2.07992e-11	2.70315e-10	UniRef100_I1LVQ4 Protein kinase domain-containing protein n=2 Tax=Soja TaxID=1462606 RepID=I1LVQ4_SOYBN
Glyma.16G170100	188.139	1.4206	0.167595	2.53187e-18	5.33821e-17	UniRef100_A0A0B2QW53 Extensin-3 n=2 Tax=Soja TaxID=1462606 RepID=A0A0B2QW53_GLYSO
Glyma.01G204600	146.212	1.42029	0.17412	3.63029e-17	7.13746e-16	UniRef100_I1J9Q7 Glutamate dehydrogenase n=2 Tax=Soja TaxID=1462606 RepID=I1J9Q7_SOYBN
Glyma.01G077700	42.8963	1.42027	0.338149	2.491e-06	1.78189e-05	UniRef100_A0A0B2Q9Q6 WAT1-related protein n=2 Tax=Soja TaxID=1462606 RepID=A0A0B2Q9Q6_GLYSO
Glyma.02G253200	737.743	1.41933	0.122158	3.27529e-32	1.38517e-30	UniRef100_A0A0B2PZC4 Lysine histidine transporter 2 n=3 Tax=Soja TaxID=1462606 RepID=A0A0B2PZC4_GLYSO
Glyma.19G012100	229.738	1.41873	0.145838	2.53401e-23	7.06725e-22	UniRef100_K7MVW5 PMR5N domain-containing protein n=1 Tax=Glycine max TaxID=3847 RepID=K7MVW5_SOYBN
Glyma.18G119300	58.7177	1.41713	0.287472	8.7096e-08	7.67606e-07	UniRef100_A0A0B2QBF1 Protein FEZ n=2 Tax=Soja TaxID=1462606 RepID=A0A0B2QBF1_GLYSO
Glyma.13G184200	12.8269	1.41689	0.676737	0.00260648	0.00999621	UniRef100_A0A0B2SI02 Protein STRUBBELIG-RECEPTOR FAMILY 3 n=3 Tax=Soja TaxID=1462606 RepID=A0A0B2SI02_GLYSO
Glyma.05G210300	312.568	1.41531	0.127478	1.23248e-29	4.59376e-28	UniRef100_A0A445KSJ3 Homeobox protein BEL1-like isoform A n=2 Tax=Soja TaxID=1462606 RepID=A0A445KSJ3_GLYSO
Glyma.01G154900	228.498	1.41479	0.15257	1.98526e-21	4.98273e-20	UniRef100_A0A0R4J2L5 Uncharacterized protein n=1 Tax=Glycine max TaxID=3847 RepID=A0A0R4J2L5_SOYBN
Glyma.20G148600	162.075	1.41432	0.177292	1.53308e-16	2.90962e-15	UniRef100_I1NGH5 IPPc domain-containing protein n=1 Tax=Glycine max TaxID=3847 RepID=I1NGH5_SOYBN
Glyma.13G134700	56.7715	1.41389	0.28356	6.06557e-08	5.46037e-07	UniRef100_I1LYX6 Uncharacterized protein n=1 Tax=Glycine max TaxID=3847 RepID=I1LYX6_SOYBN
Glyma.03G234800	346.763	1.41359	0.127235	1.30373e-29	4.85432e-28	UniRef100_K7KGM3 Uncharacterized protein n=2 Tax=Soja TaxID=1462606 RepID=K7KGM3_SOYBN
Glyma.13G267700	47.1306	1.41301	0.346545	3.99748e-06	2.77115e-05	UniRef100_K7M259 WRKY domain-containing protein n=1 Tax=Glycine max TaxID=3847 RepID=K7M259_SOYBN
Glyma.08G116800	165.887	1.41114	0.162375	3.96608e-19	8.82037e-18	UniRef100_K7L648 Uncharacterized protein n=2 Tax=Soja TaxID=1462606 RepID=K7L648_SOYBN
Glyma.10G249000	69.3322	1.41046	0.276536	3.44358e-08	3.18739e-07	UniRef100_A5Z2K3 Photosystem I subunit PsaD n=4 Tax=NPAAA clade TaxID=2231382 RepID=A5Z2K3_SOYBN
Glyma.08G365100	769.84	1.40787	0.103051	1.92081e-43	1.14479e-41	UniRef100_A0A445JPZ7 LOB domain-containing protein 41 n=2 Tax=Soja TaxID=1462606 RepID=A0A445JPZ7_GLYSO
Glyma.18G213200	53.4691	1.4078	0.302416	3.54692e-07	2.871e-06	UniRef100_B0LUS2 Transcription factor n=1 Tax=Glycine max TaxID=3847 RepID=B0LUS2_SOYBN
Glyma.06G057300	175.787	1.40772	0.182171	1.27551e-15	2.30108e-14	UniRef100_I1K8H8 Protein kinase domain-containing protein n=2 Tax=Soja TaxID=1462606 RepID=I1K8H8_SOYBN
Glyma.12G092600	206.759	1.40654	0.160126	1.88231e-19	4.27031e-18	UniRef100_A0A0R0HCQ2 Uncharacterized protein n=2 Tax=Soja TaxID=1462606 RepID=A0A0R0HCQ2_SOYBN
Glyma.05G003900	71.7669	1.40637	0.246046	1.16181e-09	1.26732e-08	UniRef100_B2ZF65 Raffionse synthase 3 n=1 Tax=Glycine max TaxID=3847 RepID=B2ZF65_SOYBN
Glyma.19G232400	366.761	1.40611	0.125347	3.98726e-30	1.52067e-28	UniRef100_A0A0R0ERV5 Uncharacterized protein n=1 Tax=Glycine max TaxID=3847 RepID=A0A0R0ERV5_SOYBN
Glyma.17G031800	191.097	1.40558	0.158021	6.90017e-20	1.60163e-18	UniRef100_A0A445G141 Acetate/butyrate--CoA ligase AAE7, peroxisomal isoform A n=2 Tax=Soja TaxID=1462606 RepID=A0A445G141_GLYSO
Glyma.15G104900	1756.01	1.40457	0.0862597	1.44598e-60	1.37433e-58	UniRef100_A0A0R4J5D6 Peptidase A1 domain-containing protein n=2 Tax=Soja TaxID=1462606 RepID=A0A0R4J5D6_SOYBN
Glyma.17G188800	157.992	1.40405	0.176485	1.96634e-16	3.71823e-15	UniRef100_A0A0B2PUK7 Uncharacterized protein n=3 Tax=Soja TaxID=1462606 RepID=A0A0B2PUK7_GLYSO
Glyma.19G259000	20.4822	1.4034	0.502004	0.00043473	0.00204176	UniRef100_A0A445FLR0 Uncharacterized protein n=3 Tax=Soja TaxID=1462606 RepID=A0A445FLR0_GLYSO
Glyma.04G209600	51.3575	1.40309	0.290547	1.42917e-07	1.22898e-06	UniRef100_I1JXY7 Uncharacterized protein n=1 Tax=Glycine max TaxID=3847 RepID=I1JXY7_SOYBN
Glyma.06G297600	1958.3	1.40282	0.0821926	2.93839e-66	3.20621e-64	UniRef100_A0A445KGJ1 Uncharacterized protein n=2 Tax=Soja TaxID=1462606 RepID=A0A445KGJ1_GLYSO
Glyma.08G216600	4793.67	1.40229	0.0609229	3.64736e-118	1.06235e-115	UniRef100_C6T440 AP2/ERF domain-containing protein n=2 Tax=Soja TaxID=1462606 RepID=C6T440_SOYBN
Glyma.14G088900	326.019	1.40092	0.12251	3.32633e-31	1.35289e-29	UniRef100_A0A445H3E7 U-box domain-containing protein 4 isoform B n=1 Tax=Glycine soja TaxID=3848 RepID=A0A445H3E7_GLYSO
Glyma.04G053800	141.305	1.4004	0.192218	3.41622e-14	5.5329e-13	UniRef100_K7KI89 PPM-type phosphatase domain-containing protein n=1 Tax=Glycine max TaxID=3847 RepID=K7KI89_SOYBN
Glyma.19G077900	74.6004	1.40029	0.239457	5.56595e-10	6.29385e-09	UniRef100_A0A0R0EJC6 Uncharacterized protein n=1 Tax=Glycine max TaxID=3847 RepID=A0A0R0EJC6_SOYBN
Glyma.13G140200	44.7074	1.39801	0.327592	2.06305e-06	1.49561e-05	UniRef100_A0A0R4J4V8 Uncharacterized protein n=1 Tax=Glycine max TaxID=3847 RepID=A0A0R4J4V8_SOYBN
Glyma.01G007000	78.5861	1.39801	0.242934	9.41778e-10	1.03892e-08	UniRef100_A0A445LX11 Protein IQ-DOMAIN 31 isoform A n=3 Tax=Soja TaxID=1462606 RepID=A0A445LX11_GLYSO
Glyma.15G091000	19.6346	1.39796	0.533253	0.000724241	0.00322971	UniRef100_K7MAG3 Auxin response factor n=3 Tax=Soja TaxID=1462606 RepID=K7MAG3_SOYBN
Glyma.03G256200	1762.15	1.39793	0.0712599	1.26942e-86	2.12257e-84	UniRef100_I1JRY6 Uncharacterized protein n=1 Tax=Glycine max TaxID=3847 RepID=I1JRY6_SOYBN
Glyma.12G137700	234.935	1.39758	0.158522	1.26066e-19	2.89456e-18	UniRef100_K7LUN8 GRAS domain-containing protein n=3 Tax=Soja TaxID=1462606 RepID=K7LUN8_SOYBN
Glyma.13G189700	89.8604	1.39268	0.246279	1.48627e-09	1.60333e-08	UniRef100_A0A445I6W4 WAT1-related protein n=2 Tax=Soja TaxID=1462606 RepID=A0A445I6W4_GLYSO
Glyma.16G008500	486.858	1.39249	0.105878	1.91508e-40	1.0707e-38	UniRef100_I1MK12 Protein kinase domain-containing protein n=2 Tax=Soja TaxID=1462606 RepID=I1MK12_SOYBN
Glyma.11G127500	43.275	1.3924	0.316517	1.15979e-06	8.72127e-06	UniRef100_A0A0B2PF00 Calmodulin-like protein 5 n=1 Tax=Glycine soja TaxID=3848 RepID=A0A0B2PF00_GLYSO
Glyma.17G216800	222.356	1.39149	0.150077	2.20484e-21	5.52617e-20	UniRef100_A0A0B2QM64 Zinc finger protein 3 n=2 Tax=Soja TaxID=1462606 RepID=A0A0B2QM64_GLYSO
Glyma.15G025200	539.585	1.39106	0.121721	3.25399e-31	1.32496e-29	UniRef100_K7M960 Uncharacterized protein n=1 Tax=Glycine max TaxID=3847 RepID=K7M960_SOYBN
Glyma.19G002802	68.1826	1.39039	0.255507	6.08874e-09	6.1358e-08	UniRef100_A0A0B2QIU4 Serine/threonine-protein kinase HT1 n=2 Tax=Glycine soja TaxID=3848 RepID=A0A0B2QIU4_GLYSO
Glyma.09G275802	78.9065	1.38917	0.254899	5.633e-09	5.70359e-08	UniRef100_A0A0R0IEC2 MACPF domain-containing protein n=1 Tax=Glycine max TaxID=3847 RepID=A0A0R0IEC2_SOYBN
Glyma.13G109800	287.353	1.38759	0.128979	6.26256e-28	2.15825e-26	UniRef100_A0A0R0GV25 Oxidored_FMN domain-containing protein n=3 Tax=Soja TaxID=1462606 RepID=A0A0R0GV25_SOYBN
Glyma.01G216000	21.7921	1.38685	0.464696	0.00025691	0.00126346	UniRef100_B3TPR9 CBF3 protein n=2 Tax=Soja TaxID=1462606 RepID=B3TPR9_SOYBN
Glyma.04G078300	1227.46	1.38679	0.0779923	1.29222e-71	1.6609e-69	UniRef100_A0A0R0KB07 BZIP domain-containing protein n=5 Tax=Soja TaxID=1462606 RepID=A0A0R0KB07_SOYBN
Glyma.15G104100	152.301	1.38574	0.175844	3.54037e-16	6.61156e-15	UniRef100_I1MFE3 Uncharacterized protein n=2 Tax=Soja TaxID=1462606 RepID=I1MFE3_SOYBN
Glyma.16G085700	142.062	1.38205	0.192742	7.86492e-14	1.23988e-12	UniRef100_A0A0B2Q2K8 TMV resistance protein N n=2 Tax=Soja TaxID=1462606 RepID=A0A0B2Q2K8_GLYSO
Glyma.11G077400	882.504	1.38193	0.0888973	2.08457e-55	1.71892e-53	UniRef100_C6T675 J domain-containing protein n=2 Tax=Soja TaxID=1462606 RepID=C6T675_SOYBN
Glyma.07G235900	80.8721	1.3788	0.271263	3.48304e-08	3.22189e-07	UniRef100_A0A0B2R8U4 Myb-related protein 305 n=2 Tax=Soja TaxID=1462606 RepID=A0A0B2R8U4_GLYSO
Glyma.17G056550	16.226	1.37742	0.552517	0.0010545	0.00450608	NA
Glyma.17G126400	2006.93	1.37724	0.0749571	2.7269e-76	3.77347e-74	UniRef100_A0A0R0FNB1 BTB domain-containing protein n=3 Tax=Soja TaxID=1462606 RepID=A0A0R0FNB1_SOYBN
Glyma.04G223300	29.1777	1.37705	0.398894	5.53907e-05	0.000312585	UniRef100_B0LUS3 Transcription factor n=2 Tax=Soja TaxID=1462606 RepID=B0LUS3_SOYBN
Glyma.05G165600	24.8702	1.3767	0.424863	0.000117111	0.000617832	UniRef100_K7KQM7 AAA domain-containing protein n=1 Tax=Glycine max TaxID=3847 RepID=K7KQM7_SOYBN
Glyma.15G141000	142.545	1.37438	0.194634	1.85416e-13	2.84239e-12	UniRef100_A0A0B2Q007 Universal stress protein A-like protein n=2 Tax=Soja TaxID=1462606 RepID=A0A0B2Q007_GLYSO
Glyma.13G222100	86.2886	1.3739	0.222662	7.54757e-11	9.30361e-10	UniRef100_A0A368UH89 Fe2OG dioxygenase domain-containing protein n=1 Tax=Glycine max TaxID=3847 RepID=A0A368UH89_SOYBN
Glyma.12G094200	206.749	1.37218	0.155995	1.7353e-19	3.94424e-18	UniRef100_I1LRL0 Protein kinase domain-containing protein n=1 Tax=Glycine max TaxID=3847 RepID=I1LRL0_SOYBN
Glyma.07G215500	319.132	1.3718	0.131508	2.02939e-26	6.46346e-25	UniRef100_I1KM27 Glycosyltransferase n=1 Tax=Glycine max TaxID=3847 RepID=I1KM27_SOYBN
Glyma.17G161500	23.8544	1.37048	0.440219	0.000175732	0.000893929	UniRef100_A0A445G7K1 BTB/POZ domain-containing protein NPY2 isoform A n=2 Tax=Soja TaxID=1462606 RepID=A0A445G7K1_GLYSO
Glyma.16G211800	935.002	1.36926	0.0928926	4.21297e-50	2.99527e-48	UniRef100_K7MIV6 Uncharacterized protein n=2 Tax=Soja TaxID=1462606 RepID=K7MIV6_SOYBN
Glyma.16G022400	111.946	1.36775	0.201537	1.32936e-12	1.90829e-11	UniRef100_A0A445GD73 Calcium-binding protein KIC isoform A n=2 Tax=Soja TaxID=1462606 RepID=A0A445GD73_GLYSO
Glyma.01G204533	99.7497	1.36764	0.231866	3.90035e-10	4.49199e-09	UniRef100_A0A445M5V9 DNA repair endonuclease UVH1 n=1 Tax=Glycine soja TaxID=3848 RepID=A0A445M5V9_GLYSO
Glyma.14G118700	90.008	1.36623	0.223003	9.7892e-11	1.19606e-09	UniRef100_I1MAD5 Protein kinase domain-containing protein n=3 Tax=Soja TaxID=1462606 RepID=I1MAD5_SOYBN
Glyma.12G019200	25.4179	1.36475	0.416897	0.000104945	0.000559204	UniRef100_A0A0B2SNC1 Uncharacterized protein n=2 Tax=Soja TaxID=1462606 RepID=A0A0B2SNC1_GLYSO
Glyma.12G022800	995.254	1.36302	0.0827352	6.38144e-62	6.28007e-60	UniRef100_I1LPF0 Uncharacterized protein n=1 Tax=Glycine max TaxID=3847 RepID=I1LPF0_SOYBN
Glyma.17G235300	69.247	1.35976	0.263209	2.41155e-08	2.2735e-07	UniRef100_K7MNL1 AB hydrolase-1 domain-containing protein n=2 Tax=Soja TaxID=1462606 RepID=K7MNL1_SOYBN
Glyma.02G292100	479.299	1.35748	0.109091	1.65345e-36	8.27116e-35	UniRef100_K7KBG4 Uncharacterized protein n=1 Tax=Glycine max TaxID=3847 RepID=K7KBG4_SOYBN
Glyma.17G214600	44.0236	1.35669	0.325274	2.99019e-06	2.11925e-05	UniRef100_UPI0007192B5B rust resistance kinase Lr10 isoform X4 n=1 Tax=Glycine max TaxID=3847 RepID=UPI0007192B5B
Glyma.18G033900	23362.8	1.35548	0.0580958	3.74687e-121	1.20827e-118	UniRef100_A0A0R0EVP0 Uncharacterized protein n=1 Tax=Glycine max TaxID=3847 RepID=A0A0R0EVP0_SOYBN
Glyma.06G067900	202.042	1.35435	0.149031	1.16162e-20	2.80256e-19	UniRef100_K7KTI2 Uncharacterized protein n=2 Tax=Soja TaxID=1462606 RepID=K7KTI2_SOYBN
Glyma.07G256100	121.293	1.3534	0.197319	8.3762e-13	1.22281e-11	UniRef100_I1KN78 DLH domain-containing protein n=2 Tax=Soja TaxID=1462606 RepID=I1KN78_SOYBN
Glyma.11G043700	62.2009	1.35254	0.265833	4.10282e-08	3.76478e-07	UniRef100_I1LH23 BHLH domain-containing protein n=3 Tax=Soja TaxID=1462606 RepID=I1LH23_SOYBN
Glyma.18G189700	58.5177	1.35233	0.277211	1.12521e-07	9.79025e-07	UniRef100_I1N2N9 Homeobox domain-containing protein n=1 Tax=Glycine max TaxID=3847 RepID=I1N2N9_SOYBN
Glyma.01G204400	5488.98	1.35178	0.05738	1.20273e-123	4.13704e-121	UniRef100_I1J9Q4 ZIM transcription factor n=3 Tax=Soja TaxID=1462606 RepID=I1J9Q4_SOYBN
Glyma.06G050800	153.248	1.35134	0.18589	3.98385e-14	6.3892e-13	UniRef100_A0A0B2RCT3 RNA_GG_bind domain-containing protein n=2 Tax=Soja TaxID=1462606 RepID=A0A0B2RCT3_GLYSO
Glyma.17G253200	390.906	1.35114	0.295975	5.0042e-07	3.96613e-06	UniRef100_UPI000233E965 bZIP transcription factor 11 n=1 Tax=Glycine max TaxID=3847 RepID=UPI000233E965
Glyma.06G176200	48.26	1.35002	0.312031	1.6685e-06	1.22383e-05	UniRef100_I1KCA0 Uncharacterized protein n=3 Tax=Soja TaxID=1462606 RepID=I1KCA0_SOYBN
Glyma.03G068200	298.739	1.34998	0.134147	9.94189e-25	2.95775e-23	UniRef100_A0A0R0KMJ2 Uncharacterized protein n=1 Tax=Glycine max TaxID=3847 RepID=A0A0R0KMJ2_SOYBN
Glyma.01G022600	170.643	1.34978	0.165815	4.81975e-17	9.39929e-16	UniRef100_I1J504 Uncharacterized protein n=1 Tax=Glycine max TaxID=3847 RepID=I1J504_SOYBN
Glyma.18G265800	24.3261	1.34953	0.471347	0.000386395	0.00183046	UniRef100_I1N4J2 Uncharacterized protein n=1 Tax=Glycine max TaxID=3847 RepID=I1N4J2_SOYBN
Glyma.20G136300	460.159	1.34829	0.111907	2.02827e-34	9.26105e-33	UniRef100_I1NG48 Inositol-tetrakisphosphate 1-kinase n=1 Tax=Glycine max TaxID=3847 RepID=I1NG48_SOYBN
Glyma.10G022300	368.972	1.34594	0.119975	4.00677e-30	1.5265e-28	UniRef100_I1L7Z3 Uncharacterized protein n=1 Tax=Glycine max TaxID=3847 RepID=I1L7Z3_SOYBN
Glyma.14G027400	27.2979	1.34561	0.440883	0.000215565	0.00107848	UniRef100_I1M6W5 Hexosyltransferase n=2 Tax=Soja TaxID=1462606 RepID=I1M6W5_SOYBN
Glyma.07G136800	5726.19	1.34468	0.08091	6.07942e-63	6.16771e-61	UniRef100_C6SYD5 Uncharacterized protein n=2 Tax=Soja TaxID=1462606 RepID=C6SYD5_SOYBN
Glyma.07G084900	1001.06	1.34408	0.0821153	4.27152e-61	4.10304e-59	UniRef100_A0A445JU85 DUF4378 domain-containing protein n=2 Tax=Soja TaxID=1462606 RepID=A0A445JU85_GLYSO
Glyma.09G197200	21.1614	1.34386	0.489237	0.000552143	0.00253647	UniRef100_UPI0002337CF6 glutamate receptor 3.6 n=1 Tax=Glycine max TaxID=3847 RepID=UPI0002337CF6
Glyma.08G292000	757.411	1.34329	0.101739	1.06158e-40	5.94438e-39	UniRef100_I1KXL2 M20_dimer domain-containing protein n=1 Tax=Glycine max TaxID=3847 RepID=I1KXL2_SOYBN
Glyma.08G301600	39.7598	1.34091	0.346772	1.14728e-05	7.36776e-05	UniRef100_I1KXU4 Uncharacterized protein n=2 Tax=Soja TaxID=1462606 RepID=I1KXU4_SOYBN
Glyma.06G018900	81.3384	1.33984	0.237109	1.74712e-09	1.87243e-08	UniRef100_I1K7E5 Uncharacterized protein n=2 Tax=Soja TaxID=1462606 RepID=I1K7E5_SOYBN
Glyma.10G016700	144.269	1.33678	0.174912	2.5219e-15	4.45396e-14	UniRef100_I1L7T5 Uncharacterized protein n=1 Tax=Glycine max TaxID=3847 RepID=I1L7T5_SOYBN
Glyma.05G150600	47.5472	1.33678	0.302016	1.06748e-06	8.0809e-06	UniRef100_I1K3Q8 Glycosyltransferase n=1 Tax=Glycine max TaxID=3847 RepID=I1K3Q8_SOYBN
Glyma.07G112000	147.89	1.33649	0.175483	3.08736e-15	5.41029e-14	UniRef100_I1KJL7 Oxygen-evolving enhancer protein 3 n=1 Tax=Glycine max TaxID=3847 RepID=I1KJL7_SOYBN
Glyma.09G092100	1243.04	1.33566	0.0845395	3.77252e-57	3.2441e-55	UniRef100_I1L290 Uncharacterized protein n=2 Tax=Soja TaxID=1462606 RepID=I1L290_SOYBN
Glyma.10G042100	36.5504	1.33561	0.360733	2.22366e-05	0.000135823	UniRef100_C6SWZ1 Uncharacterized protein n=2 Tax=Soja TaxID=1462606 RepID=C6SWZ1_SOYBN
Glyma.05G180700	16.2665	1.33449	0.605858	0.00205827	0.00813511	UniRef100_I1K4L7 Cellulase domain-containing protein n=1 Tax=Glycine max TaxID=3847 RepID=I1K4L7_SOYBN
Glyma.11G014900	540.042	1.33434	0.138413	6.48171e-23	1.77349e-21	UniRef100_I1LG54 Uncharacterized protein n=1 Tax=Glycine max TaxID=3847 RepID=I1LG54_SOYBN
Glyma.17G071700	23.9953	1.33174	0.460262	0.000347767	0.00166221	UniRef100_I1MT01 Protein kinase domain-containing protein n=1 Tax=Glycine max TaxID=3847 RepID=I1MT01_SOYBN
Glyma.01G132000	376.115	1.33159	0.114643	4.15323e-32	1.74219e-30	UniRef100_K7K3L1 Protein kinase domain-containing protein n=2 Tax=Soja TaxID=1462606 RepID=K7K3L1_SOYBN
Glyma.17G203200	150.619	1.33055	0.179336	1.41052e-14	2.35414e-13	UniRef100_UPI000233F363 molybdate transporter 1 n=1 Tax=Glycine max TaxID=3847 RepID=UPI000233F363
Glyma.07G041250	38.3061	1.33034	0.360362	2.16068e-05	0.000132177	UniRef100_A0A445JS34 Protein PLANT CADMIUM RESISTANCE 3 (Fragment) n=1 Tax=Glycine soja TaxID=3848 RepID=A0A445JS34_GLYSO
Glyma.01G096600	2077.04	1.33015	0.0730608	5.62481e-75	7.55209e-73	UniRef100_I1J6C6 BHLH domain-containing protein n=3 Tax=Soja TaxID=1462606 RepID=I1J6C6_SOYBN
Glyma.13G277000	394.811	1.32954	0.112286	3.02259e-33	1.32163e-31	UniRef100_C6T752 Uncharacterized protein n=2 Tax=Soja TaxID=1462606 RepID=C6T752_SOYBN
Glyma.07G163000	40.4083	1.32942	0.326678	5.13385e-06	3.49123e-05	UniRef100_A0A0R0JAT8 Uncharacterized protein n=1 Tax=Glycine max TaxID=3847 RepID=A0A0R0JAT8_SOYBN
Glyma.02G017100	23109.6	1.3294	0.061753	3.86031e-103	9.17256e-101	UniRef100_A0A0B2PM81 Indole-3-acetic acid-induced protein ARG2 n=2 Tax=Soja TaxID=1462606 RepID=A0A0B2PM81_GLYSO
Glyma.02G125000	857.42	1.32641	0.102328	2.27489e-39	1.243e-37	UniRef100_A0A445LN37 Protein SRG1 isoform A n=2 Tax=Soja TaxID=1462606 RepID=A0A445LN37_GLYSO
Glyma.20G188100	62.9886	1.32591	0.289221	4.77485e-07	3.79519e-06	UniRef100_I1NHN7 Uncharacterized protein n=2 Tax=Soja TaxID=1462606 RepID=I1NHN7_SOYBN
Glyma.08G320700	369.163	1.32568	0.134815	1.05425e-23	2.99342e-22	UniRef100_I1KYC2 AP2/ERF domain-containing protein n=1 Tax=Glycine max TaxID=3847 RepID=I1KYC2_SOYBN
Glyma.16G199000	44.3461	1.32516	0.31298	2.46007e-06	1.7615e-05	UniRef100_I1MQ27 C-repeat/dehydration-responsive element-binding factor CBF1-2 n=2 Tax=Soja TaxID=1462606 RepID=I1MQ27_SOYBN
Glyma.08G137500	606.953	1.32394	0.0991108	1.25254e-41	7.14661e-40	UniRef100_I1KT40 Trehalose 6-phosphate phosphatase n=1 Tax=Glycine max TaxID=3847 RepID=I1KT40_SOYBN
Glyma.17G154500	650.698	1.32384	0.102352	3.18895e-39	1.73457e-37	UniRef100_I1MVE1 Uncharacterized protein n=2 Tax=Soja TaxID=1462606 RepID=I1MVE1_SOYBN
Glyma.10G017600	15849.1	1.32217	0.0537375	1.54195e-134	6.25736e-132	UniRef100_C6SZ33 Uncharacterized protein n=2 Tax=Soja TaxID=1462606 RepID=C6SZ33_SOYBN
Glyma.15G183000	56.8356	1.32054	0.279433	2.50468e-07	2.07476e-06	UniRef100_A0A0B2SW54 GDSL esterase/lipase 5 n=2 Tax=Soja TaxID=1462606 RepID=A0A0B2SW54_GLYSO
Glyma.15G120400	236.914	1.32051	0.155778	2.92999e-18	6.1489e-17	UniRef100_I1MFS9 C2 domain-containing protein n=1 Tax=Glycine max TaxID=3847 RepID=I1MFS9_SOYBN
Glyma.14G212200	3532.5	1.31975	0.0747597	1.11907e-70	1.40339e-68	UniRef100_I1MBT5 RING-type E3 ubiquitin transferase n=2 Tax=Soja TaxID=1462606 RepID=I1MBT5_SOYBN
Glyma.15G128300	104.691	1.31924	0.220242	2.36063e-10	2.77988e-09	UniRef100_A0A445GST8 Patatin n=1 Tax=Glycine soja TaxID=3848 RepID=A0A445GST8_GLYSO
Glyma.05G023800	86.479	1.31811	0.226479	6.55224e-10	7.3493e-09	UniRef100_I1JZL5 Flavin-containing monooxygenase n=2 Tax=Soja TaxID=1462606 RepID=I1JZL5_SOYBN
Glyma.12G053900	220.96	1.31727	0.147057	4.10637e-20	9.6808e-19	UniRef100_I1LQF9 Uncharacterized protein n=2 Tax=Glycine max TaxID=3847 RepID=I1LQF9_SOYBN
Glyma.13G255900	530.45	1.31694	0.113093	3.09721e-32	1.31139e-30	UniRef100_A0A0B2QFS5 Gamma-glutamyl peptidase 5 n=2 Tax=Soja TaxID=1462606 RepID=A0A0B2QFS5_GLYSO
Glyma.05G247800	155.67	1.31647	0.178923	2.30353e-14	3.77823e-13	UniRef100_C6TEW7 Purple acid phosphatase n=2 Tax=Soja TaxID=1462606 RepID=C6TEW7_SOYBN
Glyma.09G168300	1013.26	1.31554	0.0823077	1.82066e-58	1.61169e-56	UniRef100_A0A0R4J443 Beta-amylase n=1 Tax=Glycine max TaxID=3847 RepID=A0A0R4J443_SOYBN
Glyma.06G283300	114.827	1.31491	0.206231	2.26213e-11	2.92942e-10	UniRef100_A0A0B2PJM2 Transcription factor bHLH30 n=2 Tax=Soja TaxID=1462606 RepID=A0A0B2PJM2_GLYSO
Glyma.15G017500	80.6	1.31489	0.257991	3.97525e-08	3.65243e-07	UniRef100_A0A0B2NU37 Auxin-induced protein n=3 Tax=Soja TaxID=1462606 RepID=A0A0B2NU37_GLYSO
Glyma.06G018700	768.488	1.31408	0.112744	2.50407e-32	1.06399e-30	UniRef100_I1K7E2 Uncharacterized protein n=2 Tax=Soja TaxID=1462606 RepID=I1K7E2_SOYBN
Glyma.08G018800	340.496	1.3134	0.117457	6.03614e-30	2.27565e-28	UniRef100_I1KPF9 Uncharacterized protein n=2 Tax=Soja TaxID=1462606 RepID=I1KPF9_SOYBN
Glyma.13G088700	130.853	1.3098	0.192793	1.31161e-12	1.88506e-11	UniRef100_A0A0B2SDH4 Annexin n=3 Tax=Soja TaxID=1462606 RepID=A0A0B2SDH4_GLYSO
Glyma.15G038000	79.2102	1.30879	0.246617	1.27267e-08	1.23928e-07	UniRef100_C6TMI2 Protein kinase domain-containing protein n=1 Tax=Glycine max TaxID=3847 RepID=C6TMI2_SOYBN
Glyma.01G008200	1025.7	1.30758	0.0809933	1.49784e-59	1.36955e-57	UniRef100_I1J4J3 Uncharacterized protein n=3 Tax=Soja TaxID=1462606 RepID=I1J4J3_SOYBN
Glyma.12G234200	188.748	1.30744	0.155785	6.14119e-18	1.26382e-16	UniRef100_I1LVA6 Glyco_transf_20 domain-containing protein n=1 Tax=Glycine max TaxID=3847 RepID=I1LVA6_SOYBN
Glyma.10G045700	18.0658	1.30697	0.52645	0.00116048	0.00490841	UniRef100_K7LHF9 HMA domain-containing protein n=1 Tax=Glycine max TaxID=3847 RepID=K7LHF9_SOYBN
Glyma.03G056700	533.309	1.30669	0.100297	9.89275e-40	5.4383e-38	UniRef100_C6T7L5 Chloroplast fatty acid desaturase 8 n=1 Tax=Glycine max TaxID=3847 RepID=C6T7L5_SOYBN
Glyma.13G197300	154.837	1.30606	0.175071	1.02777e-14	1.73342e-13	UniRef100_I1M0S8 Uncharacterized protein n=1 Tax=Glycine max TaxID=3847 RepID=I1M0S8_SOYBN
Glyma.18G116300	2103.49	1.30587	0.0754227	4.90855e-68	5.79353e-66	UniRef100_A0A0R0EZ61 Amino_oxidase domain-containing protein n=1 Tax=Glycine max TaxID=3847 RepID=A0A0R0EZ61_SOYBN
Glyma.15G078200	41.0535	1.30519	0.342184	1.45179e-05	9.12694e-05	UniRef100_I1MEN2 Protein kinase domain-containing protein n=1 Tax=Glycine max TaxID=3847 RepID=I1MEN2_SOYBN
Glyma.14G179800	1393.76	1.30509	0.0802748	2.31341e-60	2.1613e-58	UniRef100_I1MAY6 Uncharacterized protein n=1 Tax=Glycine max TaxID=3847 RepID=I1MAY6_SOYBN
Glyma.14G016100	55.0547	1.30317	0.27924	3.5375e-07	2.86466e-06	UniRef100_A0A0R0GF25 Uncharacterized protein n=1 Tax=Glycine max TaxID=3847 RepID=A0A0R0GF25_SOYBN
Glyma.18G221300	82.2716	1.30206	0.226723	1.08508e-09	1.18973e-08	UniRef100_I1N3F4 Uncharacterized protein n=1 Tax=Glycine max TaxID=3847 RepID=I1N3F4_SOYBN
Glyma.13G247700	931.392	1.30054	0.0979756	4.03187e-41	2.27175e-39	UniRef100_A0A0B2QFY8 Protein PLANT CADMIUM RESISTANCE 10 n=2 Tax=Soja TaxID=1462606 RepID=A0A0B2QFY8_GLYSO
Glyma.10G096800	63.8131	1.2998	0.27442	2.43774e-07	2.02446e-06	UniRef100_A0A0R0HYU4 Protein kinase domain-containing protein n=1 Tax=Glycine max TaxID=3847 RepID=A0A0R0HYU4_SOYBN
Glyma.18G000300	128.402	1.29794	0.21838	3.32687e-10	3.8524e-09	UniRef100_I1MY81 AB hydrolase-1 domain-containing protein n=2 Tax=Soja TaxID=1462606 RepID=I1MY81_SOYBN
Glyma.18G125300	62.373	1.2979	0.291312	9.83569e-07	7.48968e-06	UniRef100_A0A445FSC3 Alpha-amylase 3, chloroplastic n=1 Tax=Glycine soja TaxID=3848 RepID=A0A445FSC3_GLYSO
Glyma.01G204467	169.183	1.29741	0.167929	1.35296e-15	2.43472e-14	UniRef100_A0A445M5V9 DNA repair endonuclease UVH1 n=1 Tax=Glycine soja TaxID=3848 RepID=A0A445M5V9_GLYSO
Glyma.20G134200	190.252	1.2974	0.164521	3.96756e-16	7.38641e-15	UniRef100_I1NG31 GH10 domain-containing protein n=1 Tax=Glycine max TaxID=3847 RepID=I1NG31_SOYBN
Glyma.14G074700	252.678	1.2958	0.153546	3.98817e-18	8.30684e-17	UniRef100_I1M8C2 Uncharacterized protein n=2 Tax=Soja TaxID=1462606 RepID=I1M8C2_SOYBN
Glyma.01G191300	65.4654	1.29538	0.258099	6.26449e-08	5.62682e-07	UniRef100_I1J9C1 PPM-type phosphatase domain-containing protein n=1 Tax=Glycine max TaxID=3847 RepID=I1J9C1_SOYBN
Glyma.03G201200	92.1466	1.29516	0.231842	2.60941e-09	2.75085e-08	UniRef100_A0A0B2RMU4 NDR1/HIN1-like protein 10 n=2 Tax=Soja TaxID=1462606 RepID=A0A0B2RMU4_GLYSO
Glyma.17G096500	27.5494	1.29512	0.432623	0.000277725	0.00135402	UniRef100_A0A0R0FAU2 Protein kinase domain-containing protein n=1 Tax=Glycine max TaxID=3847 RepID=A0A0R0FAU2_SOYBN
Glyma.10G087500	312.082	1.29509	0.139136	1.80689e-21	4.54453e-20	UniRef100_I1L9Q5 Abhydrolase_3 domain-containing protein n=2 Tax=Soja TaxID=1462606 RepID=I1L9Q5_SOYBN
Glyma.20G155100	54.0984	1.29493	0.299005	1.75968e-06	1.28783e-05	UniRef100_I1NGP6 AP2/ERF domain-containing protein n=3 Tax=Soja TaxID=1462606 RepID=I1NGP6_SOYBN
Glyma.07G168900	489.771	1.29455	0.109467	3.66598e-33	1.59331e-31	UniRef100_I1KKU9 Uncharacterized protein n=2 Tax=Soja TaxID=1462606 RepID=I1KKU9_SOYBN
Glyma.03G197000	308.537	1.29446	0.138429	9.76195e-22	2.48992e-20	UniRef100_A0A0R0KU10 Uncharacterized protein n=1 Tax=Glycine max TaxID=3847 RepID=A0A0R0KU10_SOYBN
Glyma.13G285400	4610.05	1.29388	0.0620547	5.29533e-96	1.09287e-93	UniRef100_A0A445IBE0 Chitin-inducible gibberellin-responsive protein 1 isoform A n=2 Tax=Soja TaxID=1462606 RepID=A0A445IBE0_GLYSO
Glyma.19G165300	380.857	1.29379	0.122327	5.19811e-27	1.71452e-25	UniRef100_A0A445FHG1 Protein LIGHT-DEPENDENT SHORT HYPOCOTYLS 3 isoform A n=2 Tax=Soja TaxID=1462606 RepID=A0A445FHG1_GLYSO
Glyma.14G035000	20.9184	1.29272	0.477812	0.000643061	0.00290357	UniRef100_K7M4R3 Uncharacterized protein n=1 Tax=Glycine max TaxID=3847 RepID=K7M4R3_SOYBN
Glyma.17G244200	213.987	1.29145	0.153799	6.14702e-18	1.26431e-16	UniRef100_K7MNQ9 Patatin n=2 Tax=Soja TaxID=1462606 RepID=K7MNQ9_SOYBN
Glyma.09G115100	64.0408	1.29137	0.257873	6.50213e-08	5.82723e-07	UniRef100_I1L2P4 Uncharacterized protein n=3 Tax=Glycine max TaxID=3847 RepID=I1L2P4_SOYBN
Glyma.04G215800	60.8243	1.29068	0.263892	1.16376e-07	1.01062e-06	UniRef100_C6SVX7 Uncharacterized protein n=1 Tax=Glycine max TaxID=3847 RepID=C6SVX7_SOYBN
Glyma.02G239500	3128.66	1.29053	0.0613734	4.65789e-99	1.02579e-96	UniRef100_I1JHQ7 Uncharacterized protein n=2 Tax=Soja TaxID=1462606 RepID=I1JHQ7_SOYBN
Glyma.20G193400	24.6459	1.28843	0.465988	0.000534586	0.00246271	UniRef100_A0A445F7J4 DUF4220 domain-containing protein n=2 Tax=Soja TaxID=1462606 RepID=A0A445F7J4_GLYSO
Glyma.14G216400	35.2472	1.2876	0.357841	3.44078e-05	0.000202494	UniRef100_I1MC67 Uncharacterized protein n=2 Tax=Soja TaxID=1462606 RepID=I1MC67_SOYBN
Glyma.12G172500	436.318	1.28716	0.110658	3.59038e-32	1.51311e-30	UniRef100_A0A0B2PP83 Aquaporin PIP2-7 n=3 Tax=Soja TaxID=1462606 RepID=A0A0B2PP83_GLYSO
Glyma.16G120500	39.0241	1.28695	0.367547	4.9962e-05	0.000284483	UniRef100_K7MGU4 Uncharacterized protein n=1 Tax=Glycine max TaxID=3847 RepID=K7MGU4_SOYBN
Glyma.10G027900	256.305	1.28574	0.153837	7.97606e-18	1.62477e-16	UniRef100_I1L852 FLZ-type domain-containing protein n=2 Tax=Soja TaxID=1462606 RepID=I1L852_SOYBN
Glyma.13G030300	393.458	1.2856	0.113703	1.51426e-30	5.93172e-29	UniRef100_I1JFT4 Lipoxygenase n=3 Tax=Soja TaxID=1462606 RepID=I1JFT4_SOYBN
Glyma.12G239900	160.641	1.28556	0.179641	9.35336e-14	1.4694e-12	UniRef100_A0A0B2QI50 DUF246 domain-containing protein n=2 Tax=Soja TaxID=1462606 RepID=A0A0B2QI50_GLYSO
Glyma.15G162733	110.616	1.28549	0.207703	7.23913e-11	8.94783e-10	UniRef100_A0A445GUA8 Putative WRKY transcription factor 19 n=1 Tax=Glycine soja TaxID=3848 RepID=A0A445GUA8_GLYSO
Glyma.17G230700	457.773	1.28546	0.117006	5.73777e-29	2.07231e-27	UniRef100_I1MXD5 Uncharacterized protein n=3 Tax=Soja TaxID=1462606 RepID=I1MXD5_SOYBN
Glyma.04G140900	96.1986	1.28435	0.232696	4.07885e-09	4.20302e-08	UniRef100_A0A0R4J363 Annexin n=4 Tax=Soja TaxID=1462606 RepID=A0A0R4J363_SOYBN
Glyma.19G123800	25.9342	1.28405	0.426197	0.000261439	0.00128189	UniRef100_I1N8L0 Rubrerythrin domain-containing protein n=3 Tax=Soja TaxID=1462606 RepID=I1N8L0_SOYBN
Glyma.19G258700	274.537	1.28385	0.139559	4.2986e-21	1.06047e-19	UniRef100_A0A0B2RT33 Cytochrome P450 78A3 n=2 Tax=Soja TaxID=1462606 RepID=A0A0B2RT33_GLYSO
Glyma.18G291400	50.512	1.28374	0.291761	1.25778e-06	9.40327e-06	UniRef100_I1N574 Uncharacterized protein n=2 Tax=Soja TaxID=1462606 RepID=I1N574_SOYBN
Glyma.15G253500	130.13	1.28355	0.182837	2.66332e-13	4.02473e-12	UniRef100_I1MJ49 Protein kinase domain-containing protein n=1 Tax=Glycine max TaxID=3847 RepID=I1MJ49_SOYBN
Glyma.07G237600	1827.25	1.28174	0.0700312	9.10817e-76	1.24136e-73	UniRef100_I1KMN9 Uncharacterized protein n=2 Tax=Glycine max TaxID=3847 RepID=I1KMN9_SOYBN
Glyma.14G089054	557.763	1.28064	0.101154	1.22985e-37	6.3728e-36	UniRef100_I1M8V1 Uncharacterized protein n=2 Tax=Soja TaxID=1462606 RepID=I1M8V1_SOYBN
Glyma.07G253100	54.4108	1.27972	0.319335	6.4971e-06	4.35354e-05	UniRef100_C6T0B2 HPt domain-containing protein n=1 Tax=Glycine max TaxID=3847 RepID=C6T0B2_SOYBN
Glyma.14G089000	103.104	1.27964	0.204746	5.14812e-11	6.4763e-10	UniRef100_I1J464 AB hydrolase-1 domain-containing protein n=2 Tax=Soja TaxID=1462606 RepID=I1J464_SOYBN
Glyma.11G206100	90.1618	1.27915	0.240708	1.34971e-08	1.30691e-07	UniRef100_A0A0R0HTB4 Uncharacterized protein n=1 Tax=Glycine max TaxID=3847 RepID=A0A0R0HTB4_SOYBN
Glyma.17G191250	493.484	1.27779	0.360192	3.84612e-05	0.000224147	UniRef100_UPI000E21C15D uncharacterized protein LOC102660328 n=1 Tax=Glycine max TaxID=3847 RepID=UPI000E21C15D
Glyma.01G185800	2058.98	1.27729	0.0712588	8.7968e-73	1.14286e-70	UniRef100_Q43457 Heat shock transcription factor 34 n=1 Tax=Glycine max TaxID=3847 RepID=Q43457_SOYBN
Glyma.13G248800	70.7002	1.27642	0.270936	2.75653e-07	2.26679e-06	UniRef100_K7M1R6 Receptor-like serine/threonine-protein kinase n=3 Tax=Soja TaxID=1462606 RepID=K7M1R6_SOYBN
Glyma.05G085600	28.4892	1.2728	0.396849	0.000142284	0.000739724	UniRef100_UPI0003DE79B0 1-aminocyclopropane-1-carboxylate oxidase homolog isoform X4 n=1 Tax=Glycine soja TaxID=3848 RepID=UPI0003DE79B0
Glyma.02G014800	16.6924	1.27185	0.551083	0.00184735	0.00739289	UniRef100_A0A0B2PM03 Kynurenine--oxoglutarate transaminase 1 n=3 Tax=Soja TaxID=1462606 RepID=A0A0B2PM03_GLYSO
Glyma.17G047700	3434	1.27177	0.076148	1.51389e-63	1.56668e-61	UniRef100_I1MS89 Tify domain-containing protein n=3 Tax=Soja TaxID=1462606 RepID=I1MS89_SOYBN
Glyma.19G234500	63.7342	1.27175	0.282211	7.13453e-07	5.54202e-06	UniRef100_I1NBY8 C2H2-type domain-containing protein n=2 Tax=Soja TaxID=1462606 RepID=I1NBY8_SOYBN
Glyma.04G080300	388.283	1.26949	0.118978	2.03024e-27	6.85934e-26	UniRef100_K7KIU3 Uncharacterized protein n=2 Tax=Soja TaxID=1462606 RepID=K7KIU3_SOYBN
Glyma.18G044000	1457.95	1.26919	0.0753364	1.39877e-64	1.47717e-62	UniRef100_A0A445FP40 PH, RCC1 and FYVE domains-containing protein 1 isoform A n=3 Tax=Soja TaxID=1462606 RepID=A0A445FP40_GLYSO
Glyma.07G205000	20.9753	1.26901	0.49102	0.00086655	0.00377985	UniRef100_I1KLS8 Lipase_3 domain-containing protein n=2 Tax=Soja TaxID=1462606 RepID=I1KLS8_SOYBN
Glyma.11G039400	3417.21	1.26813	0.0735873	2.06205e-67	2.38702e-65	UniRef100_I1LGW4 Beta-amylase n=2 Tax=Soja TaxID=1462606 RepID=I1LGW4_SOYBN
Glyma.18G259000	193.819	1.26789	0.166651	3.60119e-15	6.26815e-14	UniRef100_K7MUS9 Uncharacterized protein n=1 Tax=Glycine max TaxID=3847 RepID=K7MUS9_SOYBN
Glyma.06G206400	17.6847	1.26441	0.508802	0.00121186	0.00510123	UniRef100_A0A445KCG4 Dof zinc finger protein DOF5.4 n=1 Tax=Glycine soja TaxID=3848 RepID=A0A445KCG4_GLYSO
Glyma.12G170500	788.288	1.26431	0.0853154	1.37229e-50	9.87309e-49	UniRef100_A0A0B2SKR0 Potassium channel AKT2/3 n=5 Tax=Soja TaxID=1462606 RepID=A0A0B2SKR0_GLYSO
Glyma.16G010000	3497.39	1.26411	0.0647818	1.43217e-86	2.38367e-84	UniRef100_C6TNM1 Tify domain-containing protein n=2 Tax=Soja TaxID=1462606 RepID=C6TNM1_SOYBN
Glyma.06G248900	1343.12	1.26357	0.0771298	3.27939e-61	3.15845e-59	UniRef100_I1KE01 NAC transcription factor n=1 Tax=Glycine max TaxID=3847 RepID=I1KE01_SOYBN
Glyma.17G011600	263.738	1.2623	0.138363	9.59115e-21	2.32798e-19	UniRef100_I1MR38 Uncharacterized protein n=2 Tax=Soja TaxID=1462606 RepID=I1MR38_SOYBN
Glyma.19G164600	282.109	1.26208	0.127187	4.28863e-24	1.24013e-22	UniRef100_K7MYP5 MYB4-like protein n=2 Tax=Soja TaxID=1462606 RepID=K7MYP5_SOYBN
Glyma.04G190900	57.4433	1.26163	0.275404	5.53766e-07	4.36784e-06	UniRef100_A0A0B2PDZ6 BTB/POZ and TAZ domain-containing protein 2 n=3 Tax=Soja TaxID=1462606 RepID=A0A0B2PDZ6_GLYSO
Glyma.12G163053	23.9207	1.26067	0.431232	0.00035376	0.00168759	UniRef100_I1LT79 bHLH-MYC_N domain-containing protein n=4 Tax=Soja TaxID=1462606 RepID=I1LT79_SOYBN
Glyma.09G282600	298.586	1.26066	0.127041	4.43845e-24	1.28243e-22	UniRef100_A0A0R0IEJ8 Uncharacterized protein n=1 Tax=Glycine max TaxID=3847 RepID=A0A0R0IEJ8_SOYBN
Glyma.13G229300	3156.04	1.26017	0.0733665	4.83712e-67	5.51994e-65	UniRef100_I1M1T4 Uncharacterized protein n=1 Tax=Glycine max TaxID=3847 RepID=I1M1T4_SOYBN
Glyma.15G271900	1011.81	1.2597	0.0795141	1.98988e-57	1.73596e-55	UniRef100_A0A0R0GE08 BHLH domain-containing protein n=2 Tax=Glycine max TaxID=3847 RepID=A0A0R0GE08_SOYBN
Glyma.15G066100	800.91	1.25955	0.0971595	2.32119e-39	1.26638e-37	UniRef100_A0A0R0FWV5 Uncharacterized protein n=2 Tax=Soja TaxID=1462606 RepID=A0A0R0FWV5_SOYBN
Glyma.11G131200	50.3209	1.25911	0.296629	2.60498e-06	1.8579e-05	UniRef100_A0A445I1E2 Transcription factor bHLH122 isoform A n=2 Tax=Soja TaxID=1462606 RepID=A0A445I1E2_GLYSO
Glyma.09G039900	43.1997	1.25879	0.332208	1.61608e-05	0.000100843	UniRef100_I1L0U8 Uncharacterized protein n=1 Tax=Glycine max TaxID=3847 RepID=I1L0U8_SOYBN
Glyma.17G118200	729.953	1.25697	0.102486	1.76272e-35	8.42121e-34	UniRef100_C6TFR7 Uncharacterized protein n=2 Tax=Soja TaxID=1462606 RepID=C6TFR7_SOYBN
Glyma.16G026900	918.385	1.25656	0.0884601	1.14229e-46	7.44697e-45	UniRef100_A0A445GDF0 Jasmonic acid-amido synthetase JAR1 isoform A n=2 Tax=Soja TaxID=1462606 RepID=A0A445GDF0_GLYSO
Glyma.19G222300	90.4765	1.25631	0.227228	3.88185e-09	4.0122e-08	UniRef100_I1NBJ6 Uncharacterized protein n=1 Tax=Glycine max TaxID=3847 RepID=I1NBJ6_SOYBN
Glyma.05G139500	168.51	1.2549	0.173082	5.27408e-14	8.39506e-13	UniRef100_A0A0B2SH80 Cysteine-rich receptor-like protein kinase 10 n=5 Tax=Soja TaxID=1462606 RepID=A0A0B2SH80_GLYSO
Glyma.13G272300	160.343	1.25475	0.171338	3.20911e-14	5.20915e-13	UniRef100_K7M290 Uncharacterized protein n=2 Tax=Soja TaxID=1462606 RepID=K7M290_SOYBN
Glyma.19G257000	134.159	1.2544	0.183884	1.14013e-12	1.64384e-11	UniRef100_C6SV86 Uncharacterized protein n=2 Tax=Soja TaxID=1462606 RepID=C6SV86_SOYBN
Glyma.06G275500	203.462	1.25369	0.150953	1.33095e-17	2.68248e-16	UniRef100_A0A0B2RQ35 Uncharacterized protein n=2 Tax=Soja TaxID=1462606 RepID=A0A0B2RQ35_GLYSO
Glyma.16G153400	40.9796	1.25354	0.353113	4.04726e-05	0.000234857	UniRef100_I1MNU3 Glutamate dehydrogenase n=2 Tax=Soja TaxID=1462606 RepID=I1MNU3_SOYBN
Glyma.19G145300	1250.51	1.25328	0.0903984	1.31128e-44	8.13735e-43	UniRef100_A0A0R0EMF9 Uncharacterized protein n=2 Tax=Glycine max TaxID=3847 RepID=A0A0R0EMF9_SOYBN
Glyma.15G143400	74.1221	1.25229	0.24727	5.06445e-08	4.60417e-07	UniRef100_A0A445GTI5 Calmodulin-binding transcription activator 5 isoform A n=2 Tax=Soja TaxID=1462606 RepID=A0A445GTI5_GLYSO
Glyma.02G009400	41.5083	1.25198	0.350674	3.7498e-05	0.000219074	UniRef100_C6T5J0 Uncharacterized protein n=2 Tax=Soja TaxID=1462606 RepID=C6T5J0_SOYBN
Glyma.11G134200	564.032	1.25025	0.10119	5.74543e-36	2.80038e-34	UniRef100_I1LJW6 SHSP domain-containing protein n=2 Tax=Soja TaxID=1462606 RepID=I1LJW6_SOYBN
Glyma.14G034700	124.17	1.24988	0.208159	2.36415e-10	2.78221e-09	UniRef100_I1M743 Uncharacterized protein n=1 Tax=Glycine max TaxID=3847 RepID=I1M743_SOYBN
Glyma.10G234700	262.3	1.24914	0.135375	3.38678e-21	8.40113e-20	UniRef100_A0A0B2QK26 Cytochrome P450 714C2 isoform B n=2 Tax=Soja TaxID=1462606 RepID=A0A0B2QK26_GLYSO
Glyma.10G065400	54.3449	1.24564	0.290216	2.0421e-06	1.48072e-05	UniRef100_K7LHS1 Uncharacterized protein n=1 Tax=Glycine max TaxID=3847 RepID=K7LHS1_SOYBN
Glyma.19G214600	171.895	1.24493	0.208821	3.08931e-10	3.58652e-09	UniRef100_I1NBA6 C2H2-type domain-containing protein n=2 Tax=Soja TaxID=1462606 RepID=I1NBA6_SOYBN
Glyma.13G285300	220.436	1.24407	0.15019	1.64769e-17	3.31161e-16	UniRef100_O81972 Cytochrome P450 82A2 n=3 Tax=Soja TaxID=1462606 RepID=C82A2_SOYBN
Glyma.01G117200	357.554	1.24385	0.124634	2.5981e-24	7.60418e-23	UniRef100_A0A0R0L9K1 LRRNT_2 domain-containing protein n=1 Tax=Glycine max TaxID=3847 RepID=A0A0R0L9K1_SOYBN
Glyma.13G200000	119.39	1.24328	0.189186	6.16664e-12	8.40456e-11	UniRef100_I1M0V2 Uncharacterized protein n=3 Tax=Soja TaxID=1462606 RepID=I1M0V2_SOYBN
Glyma.17G194600	37.2974	1.2425	0.357835	5.75665e-05	0.0003237	UniRef100_A0A0R0FNN4 Uncharacterized protein n=1 Tax=Glycine max TaxID=3847 RepID=A0A0R0FNN4_SOYBN
Glyma.03G160400	81.5952	1.24248	0.241445	3.259e-08	3.02818e-07	UniRef100_C6TFW2 Uncharacterized protein n=2 Tax=Soja TaxID=1462606 RepID=C6TFW2_SOYBN
Glyma.13G221700	76.6609	1.24013	0.239695	2.71839e-08	2.54287e-07	UniRef100_I1M1J8 Uncharacterized protein n=4 Tax=Soja TaxID=1462606 RepID=I1M1J8_SOYBN
Glyma.19G079900	117.039	1.23986	0.215002	1.016e-09	1.11773e-08	UniRef100_K7MX70 Uncharacterized protein n=1 Tax=Glycine max TaxID=3847 RepID=K7MX70_SOYBN
Glyma.14G167000	16.5477	1.23751	0.539795	0.00198181	0.00786918	UniRef100_I1MAN9 Uncharacterized protein n=2 Tax=Glycine max TaxID=3847 RepID=I1MAN9_SOYBN
Glyma.03G138700	15.9524	1.23634	0.548049	0.00216283	0.00850923	UniRef100_I1JNE8 Uncharacterized protein n=1 Tax=Glycine max TaxID=3847 RepID=I1JNE8_SOYBN
Glyma.10G023500	75.7382	1.23532	0.238686	2.87835e-08	2.68624e-07	UniRef100_I1L806 Endo/exonuclease/phosphatase domain-containing protein n=2 Tax=Soja TaxID=1462606 RepID=I1L806_SOYBN
Glyma.02G000800	456.037	1.2347	0.118082	1.83861e-26	5.88177e-25	UniRef100_I1JB39 BHLH domain-containing protein n=3 Tax=Soja TaxID=1462606 RepID=I1JB39_SOYBN
Glyma.14G016000	58.075	1.23444	0.270019	6.05998e-07	4.74665e-06	UniRef100_A0A0R0GEN3 GRAS domain-containing protein n=2 Tax=Glycine max TaxID=3847 RepID=A0A0R0GEN3_SOYBN
Glyma.17G065800	85.3023	1.23411	0.224871	4.9229e-09	5.02829e-08	UniRef100_I1MST6 Uncharacterized protein n=2 Tax=Soja TaxID=1462606 RepID=I1MST6_SOYBN
Glyma.12G104600	254.187	1.23403	0.144633	1.96795e-18	4.17606e-17	UniRef100_K7LU25 Uncharacterized protein n=2 Tax=Glycine max TaxID=3847 RepID=K7LU25_SOYBN
Glyma.13G008702	15.3665	1.23361	0.566055	0.00258684	0.00993291	UniRef100_K7LYD7 Uncharacterized protein n=1 Tax=Glycine max TaxID=3847 RepID=K7LYD7_SOYBN
Glyma.13G279900	2908.72	1.23339	0.0622533	2.99316e-88	5.1973e-86	UniRef100_I1M3B9 NAC transcription factor n=2 Tax=Soja TaxID=1462606 RepID=I1M3B9_SOYBN
Glyma.01G120400	372.973	1.23265	0.113376	2.00577e-28	7.08137e-27	UniRef100_A0A0B2RSK3 Omega-3 fatty acid desaturase, chloroplastic n=2 Tax=Soja TaxID=1462606 RepID=A0A0B2RSK3_GLYSO
Glyma.02G290900	215.309	1.23253	0.144585	2.06382e-18	4.37435e-17	UniRef100_A0A445LVN4 Uncharacterized protein n=2 Tax=Soja TaxID=1462606 RepID=A0A445LVN4_GLYSO
Glyma.20G061300	154.47	1.23184	0.175161	2.54667e-13	3.85491e-12	UniRef100_K7N1C6 TIR domain-containing protein n=1 Tax=Glycine max TaxID=3847 RepID=K7N1C6_SOYBN
Glyma.18G070100	42.3199	1.23118	0.342671	3.61924e-05	0.000212064	UniRef100_I1N047 Uncharacterized protein n=1 Tax=Glycine max TaxID=3847 RepID=I1N047_SOYBN
Glyma.12G031700	226.313	1.23018	0.142499	7.58019e-19	1.65123e-17	UniRef100_C6T2Y0 ADF-H domain-containing protein n=3 Tax=Soja TaxID=1462606 RepID=C6T2Y0_SOYBN
Glyma.16G029800	712.585	1.23004	0.227135	7.20465e-09	7.19608e-08	UniRef100_C6TI27 Uncharacterized protein n=2 Tax=Soja TaxID=1462606 RepID=C6TI27_SOYBN
Glyma.08G135200	402.334	1.22882	0.112975	1.84102e-28	6.51246e-27	UniRef100_I1KT10 Uncharacterized protein n=1 Tax=Glycine max TaxID=3847 RepID=I1KT10_SOYBN
Glyma.14G205100	37.2612	1.22853	0.344965	4.31573e-05	0.000248956	UniRef100_I1MBL4 NAB domain-containing protein n=2 Tax=Glycine max TaxID=3847 RepID=I1MBL4_SOYBN
Glyma.11G158200	356.235	1.22846	0.150786	4.87867e-17	9.50367e-16	UniRef100_I1LLH2 Uncharacterized protein n=1 Tax=Glycine max TaxID=3847 RepID=I1LLH2_SOYBN
Glyma.04G020300	251.846	1.22794	0.137165	4.63908e-20	1.09082e-18	UniRef100_I1JSY7 Plastocyanin n=2 Tax=Soja TaxID=1462606 RepID=I1JSY7_SOYBN
Glyma.06G061900	263.861	1.22751	0.136766	3.71095e-20	8.76003e-19	UniRef100_C6TEF4 WRKY domain-containing protein n=3 Tax=Soja TaxID=1462606 RepID=C6TEF4_SOYBN
Glyma.11G029100	24.8805	1.22653	0.435639	0.00050191	0.00232284	UniRef100_A0A445HWA0 Protein cornichon-like 4 isoform A n=1 Tax=Glycine soja TaxID=3848 RepID=A0A445HWA0_GLYSO
Glyma.14G171800	178.18	1.22639	0.162865	6.84659e-15	1.17249e-13	UniRef100_A0A0B2QQ71 TPR repeat-containing thioredoxin TTL1 n=2 Tax=Soja TaxID=1462606 RepID=A0A0B2QQ71_GLYSO
Glyma.06G036900	26.7448	1.22314	0.449562	0.000655955	0.00295253	UniRef100_I1K7X1 Uncharacterized protein n=2 Tax=Soja TaxID=1462606 RepID=I1K7X1_SOYBN
Glyma.08G255300	779.752	1.22302	0.0877751	5.60525e-45	3.50857e-43	UniRef100_I1KWN4 Protein kinase domain-containing protein n=1 Tax=Glycine max TaxID=3847 RepID=I1KWN4_SOYBN
Glyma.16G023900	1239.01	1.22282	0.0755589	8.78383e-60	8.093e-58	UniRef100_I1MKI1 BHLH domain-containing protein n=2 Tax=Soja TaxID=1462606 RepID=I1MKI1_SOYBN
Glyma.08G099900	187.13	1.22264	0.165901	2.24011e-14	3.67633e-13	UniRef100_I1KRX0 Remorin_C domain-containing protein n=2 Tax=Soja TaxID=1462606 RepID=I1KRX0_SOYBN
Glyma.10G187600	107.621	1.2224	0.211937	1.02972e-09	1.13247e-08	UniRef100_A0A0R0HVB8 Uncharacterized protein n=1 Tax=Glycine max TaxID=3847 RepID=A0A0R0HVB8_SOYBN
Glyma.17G135100	1042.31	1.22178	0.0802451	3.4539e-53	2.6598e-51	UniRef100_A0A0R4J5Q0 Uncharacterized protein n=3 Tax=Soja TaxID=1462606 RepID=A0A0R4J5Q0_SOYBN
Glyma.20G018400	47.3003	1.22089	0.330366	2.59658e-05	0.000156641	UniRef100_A0A0R0E5I8 Uncharacterized protein n=2 Tax=Soja TaxID=1462606 RepID=A0A0R0E5I8_SOYBN
Glyma.02G097900	854.997	1.22073	0.0894038	2.56012e-43	1.52078e-41	UniRef100_A0A0B2R0A3 Transcription factor HBP-1b(C1) n=3 Tax=Soja TaxID=1462606 RepID=A0A0B2R0A3_GLYSO
Glyma.11G234600	96.199	1.22025	0.219097	3.20474e-09	3.33753e-08	UniRef100_I1LMW8 Aa_trans domain-containing protein n=2 Tax=Soja TaxID=1462606 RepID=I1LMW8_SOYBN
Glyma.05G186700	437.541	1.21997	0.116689	1.93371e-26	6.16961e-25	UniRef100_A0A0B2RP72 Ethylene-responsive transcription factor ERF114 n=2 Tax=Soja TaxID=1462606 RepID=A0A0B2RP72_GLYSO
Glyma.13G301600	647.293	1.21971	0.0929936	3.5969e-40	1.9986e-38	UniRef100_C6SVY8 Uncharacterized protein n=2 Tax=Soja TaxID=1462606 RepID=C6SVY8_SOYBN
Glyma.02G257200	92.237	1.21851	0.217087	2.6189e-09	2.76005e-08	UniRef100_I1JI90 Phosphoinositide phospholipase C n=2 Tax=Soja TaxID=1462606 RepID=I1JI90_SOYBN
Glyma.13G088300	308.845	1.21847	0.128338	2.93004e-22	7.68512e-21	UniRef100_A0A0B2QE53 Trehalose 6-phosphate phosphatase n=2 Tax=Soja TaxID=1462606 RepID=A0A0B2QE53_GLYSO
Glyma.07G014600	28.1823	1.21784	0.423441	0.000435983	0.00204685	UniRef100_I1KGH7 Uncharacterized protein n=1 Tax=Glycine max TaxID=3847 RepID=I1KGH7_SOYBN
Glyma.11G129500	3188.37	1.21781	0.0689191	8.93123e-71	1.12787e-68	UniRef100_A0A0B2RH44 Beta-glucosidase 24 n=2 Tax=Soja TaxID=1462606 RepID=A0A0B2RH44_GLYSO
Glyma.07G113400	35.4461	1.21705	0.375706	0.000129243	0.000676699	UniRef100_K7L180 Uncharacterized protein n=1 Tax=Glycine max TaxID=3847 RepID=K7L180_SOYBN
Glyma.05G017100	35.7576	1.21614	0.365424	9.34961e-05	0.000502799	UniRef100_I1K167 CYSTM domain-containing protein n=2 Tax=Soja TaxID=1462606 RepID=I1K167_SOYBN
Glyma.03G068701	33.9803	1.2161	0.364697	9.74645e-05	0.000522506	UniRef100_UPI00103D2A44 uncharacterized protein LOC114371519 n=1 Tax=Glycine soja TaxID=3848 RepID=UPI00103D2A44
Glyma.17G188500	572.707	1.21592	0.107324	1.16342e-30	4.60735e-29	UniRef100_A0A445G8P1 Basic leucine zipper 9 n=3 Tax=Soja TaxID=1462606 RepID=A0A445G8P1_GLYSO
Glyma.09G261700	15.9131	1.21448	0.555698	0.00259053	0.00994603	UniRef100_I1L6M0 Uncharacterized protein n=1 Tax=Glycine max TaxID=3847 RepID=I1L6M0_SOYBN
Glyma.12G222500	3566.42	1.21415	0.0688243	1.60213e-70	1.98846e-68	UniRef100_I1LUY9 Uncharacterized protein n=1 Tax=Glycine max TaxID=3847 RepID=I1LUY9_SOYBN
Glyma.01G131100	2188.34	1.21405	0.0718293	5.72792e-65	6.12057e-63	UniRef100_A0A0B2SKM1 Aspartate aminotransferase, mitochondrial n=2 Tax=Soja TaxID=1462606 RepID=A0A0B2SKM1_GLYSO
Glyma.14G073300	549.286	1.21263	0.0994209	4.75401e-35	2.21549e-33	UniRef100_A0A0R0GJJ1 F-box domain-containing protein n=2 Tax=Soja TaxID=1462606 RepID=A0A0R0GJJ1_SOYBN
Glyma.10G273200	1192.59	1.21142	0.080249	2.43441e-52	1.83556e-50	UniRef100_I1LEV9 Uncharacterized protein n=2 Tax=Soja TaxID=1462606 RepID=I1LEV9_SOYBN
Glyma.14G217700	16.5039	1.2107	0.538548	0.00224346	0.00877772	UniRef100_I1MC56 Auxin response factor n=1 Tax=Glycine max TaxID=3847 RepID=I1MC56_SOYBN
Glyma.19G214500	91.8326	1.20857	0.219856	4.76046e-09	4.8734e-08	UniRef100_I1NBA5 Uncharacterized protein n=2 Tax=Soja TaxID=1462606 RepID=I1NBA5_SOYBN
Glyma.04G021200	3662.48	1.20725	0.068886	1.25675e-69	1.52315e-67	UniRef100_I1JSZ6 RING-type domain-containing protein n=2 Tax=Soja TaxID=1462606 RepID=I1JSZ6_SOYBN
Glyma.16G145300	22.0037	1.2069	0.472602	0.00106012	0.00452687	UniRef100_I1MNL7 Carboxypeptidase n=2 Tax=Soja TaxID=1462606 RepID=I1MNL7_SOYBN
Glyma.10G238300	37.4143	1.20658	0.377086	0.000143192	0.000743911	UniRef100_K7LL46 DUF4005 domain-containing protein n=1 Tax=Glycine max TaxID=3847 RepID=K7LL46_SOYBN
Glyma.09G163900	1609.3	1.20636	0.0727169	1.14944e-62	1.14998e-60	UniRef100_A0A0R0I9A7 Uncharacterized protein n=2 Tax=Soja TaxID=1462606 RepID=A0A0R0I9A7_SOYBN
Glyma.15G074800	503.802	1.20537	0.109445	4.97801e-29	1.80876e-27	UniRef100_A0A445GQF9 Uncharacterized protein n=1 Tax=Glycine soja TaxID=3848 RepID=A0A445GQF9_GLYSO
Glyma.12G215800	58.7121	1.20474	0.273788	1.32526e-06	9.86085e-06	UniRef100_I1LUS6 Epimerase domain-containing protein n=3 Tax=Soja TaxID=1462606 RepID=I1LUS6_SOYBN
Glyma.02G114100	89.9657	1.20452	0.217662	4.07648e-09	4.20178e-08	UniRef100_K7K7S0 Uncharacterized protein n=1 Tax=Glycine max TaxID=3847 RepID=K7K7S0_SOYBN
Glyma.19G187500	58.3897	1.20428	0.271794	1.20325e-06	9.01906e-06	UniRef100_I1NAE6 Glycosyltransferase n=2 Tax=Soja TaxID=1462606 RepID=I1NAE6_SOYBN
Glyma.18G041000	1061.64	1.20408	0.0881917	2.75256e-43	1.63242e-41	UniRef100_I1MZF2 Cnd3 domain-containing protein n=1 Tax=Glycine max TaxID=3847 RepID=I1MZF2_SOYBN
Glyma.01G069000	49.7827	1.20363	0.327038	2.5581e-05	0.000154474	UniRef100_I1J684 Uncharacterized protein n=2 Tax=Soja TaxID=1462606 RepID=I1J684_SOYBN
Glyma.06G249800	142.935	1.20356	0.175082	8.04506e-13	1.17637e-11	UniRef100_A0A0B2RVU8 Phytohormone-binding protein n=2 Tax=Soja TaxID=1462606 RepID=A0A0B2RVU8_GLYSO
Glyma.02G209400	448.923	1.20333	0.106716	2.38741e-30	9.23192e-29	UniRef100_I1JGW0 Uncharacterized protein n=2 Tax=Soja TaxID=1462606 RepID=I1JGW0_SOYBN
Glyma.03G258300	440.756	1.20312	0.113807	5.87993e-27	1.93587e-25	UniRef100_UPI00023C215F auxin response factor 18 isoform X1 n=1 Tax=Glycine max TaxID=3847 RepID=UPI00023C215F
Glyma.02G267900	948.192	1.2022	0.082005	1.62166e-49	1.13507e-47	UniRef100_A0A445LUL8 Tyrosine-protein phosphatase DSP1 isoform B n=3 Tax=Soja TaxID=1462606 RepID=A0A445LUL8_GLYSO
Glyma.20G065500	34.209	1.20199	0.365582	0.000113502	0.000600109	UniRef100_A0A0R0E7S3 Uncharacterized protein n=2 Tax=Soja TaxID=1462606 RepID=A0A0R0E7S3_SOYBN
Glyma.09G013700	1910.14	1.20186	0.0673213	3.86587e-72	4.98656e-70	UniRef100_I1L029 Uncharacterized protein n=4 Tax=Soja TaxID=1462606 RepID=I1L029_SOYBN
Glyma.13G112000	5738.83	1.20162	0.0593006	2.35563e-93	4.47781e-91	UniRef100_I1LY77 ZIM transcription factor n=1 Tax=Glycine max TaxID=3847 RepID=I1LY77_SOYBN
Glyma.02G288600	129.076	1.20104	0.20291	4.23209e-10	4.85548e-09	UniRef100_I1JJ63 Protein kinase domain-containing protein n=3 Tax=Soja TaxID=1462606 RepID=I1JJ63_SOYBN
Glyma.09G204600	99.223	1.20052	0.205546	6.85294e-10	7.66299e-09	UniRef100_K7LF25 Ubiquitin carboxyl-terminal hydrolase n=2 Tax=Soja TaxID=1462606 RepID=K7LF25_SOYBN
Glyma.02G071002	38.4547	1.19912	0.332006	3.57985e-05	0.00020996	UniRef100_A0A0R0KYX9 Pyruvate kinase (Fragment) n=1 Tax=Glycine max TaxID=3847 RepID=A0A0R0KYX9_SOYBN
Glyma.06G081100	122.517	1.1991	0.215646	3.72611e-09	3.86158e-08	UniRef100_A0A0B2QDX4 BURP domain protein RD22 isoform A n=3 Tax=Soja TaxID=1462606 RepID=A0A0B2QDX4_GLYSO
Glyma.01G199800	35.5816	1.19873	0.344746	5.92384e-05	0.000332429	UniRef100_A0A0R0LKR7 Uncharacterized protein n=2 Tax=Glycine max TaxID=3847 RepID=A0A0R0LKR7_SOYBN
Glyma.07G192900	1009.26	1.19775	0.0794587	3.15753e-52	2.37585e-50	UniRef100_A0A0B2PHV8 NAC domain-containing protein 18 n=2 Tax=Soja TaxID=1462606 RepID=A0A0B2PHV8_GLYSO
Glyma.07G192000	256.056	1.19754	0.147222	5.55438e-17	1.07911e-15	UniRef100_A0A0B2PHW4 Bromo domain-containing protein n=3 Tax=Soja TaxID=1462606 RepID=A0A0B2PHW4_GLYSO
Glyma.19G010900	48.6747	1.19749	0.304437	1.02789e-05	6.66267e-05	UniRef100_I1N5U5 Potassium transporter n=3 Tax=Soja TaxID=1462606 RepID=I1N5U5_SOYBN
Glyma.10G166600	4415.89	1.19723	0.0572298	4.58234e-98	9.9102e-96	UniRef100_Q8GSL0 Phosphoenolpyruvate-carboxylase kinase n=2 Tax=Soja TaxID=1462606 RepID=Q8GSL0_SOYBN
Glyma.08G251700	2191.33	1.19709	0.0806822	1.2038e-50	8.69555e-49	UniRef100_C6TNU0 F-box domain-containing protein n=2 Tax=Soja TaxID=1462606 RepID=C6TNU0_SOYBN
Glyma.14G028100	3091.55	1.19675	0.0640103	7.22677e-79	1.04404e-76	UniRef100_I1M6X2 Mitogen-activated protein kinase n=2 Tax=Soja TaxID=1462606 RepID=I1M6X2_SOYBN
Glyma.14G126950	37.6261	1.19605	0.403648	0.000317053	0.00152748	UniRef100_UPI000E21BCA5 uncharacterized protein LOC106796729 n=1 Tax=Glycine max TaxID=3847 RepID=UPI000E21BCA5
Glyma.03G073400	26.3565	1.19589	0.410879	0.000402076	0.00189976	UniRef100_I1JLZ3 Uncharacterized protein n=1 Tax=Glycine max TaxID=3847 RepID=I1JLZ3_SOYBN
Glyma.17G071800	33.2495	1.19472	0.359359	0.000102647	0.000547852	UniRef100_A0A0R0FKQ2 GTD-binding domain-containing protein n=1 Tax=Glycine max TaxID=3847 RepID=A0A0R0FKQ2_SOYBN
Glyma.11G125400	626.393	1.19414	0.098579	1.30375e-34	5.98317e-33	UniRef100_A0A0B2PF36 Peroxisomal membrane protein 13 n=3 Tax=Soja TaxID=1462606 RepID=A0A0B2PF36_GLYSO
Glyma.13G200400	1803	1.19413	0.0719613	1.06565e-62	1.06912e-60	UniRef100_I1M0V5 Flavin-containing monooxygenase n=1 Tax=Glycine max TaxID=3847 RepID=I1M0V5_SOYBN
Glyma.19G244800	143.537	1.19329	0.174674	1.11481e-12	1.6099e-11	UniRef100_I1NC96 BZIP domain-containing protein n=2 Tax=Soja TaxID=1462606 RepID=I1NC96_SOYBN
Glyma.20G119600	48.9318	1.19302	0.312545	1.70689e-05	0.000105924	UniRef100_K7N302 Protein kinase domain-containing protein n=1 Tax=Glycine max TaxID=3847 RepID=K7N302_SOYBN
Glyma.15G005600	2356.02	1.19211	0.069442	5.64466e-67	6.39086e-65	UniRef100_I1MCD3 Uncharacterized protein n=1 Tax=Glycine max TaxID=3847 RepID=I1MCD3_SOYBN
Glyma.04G186300	71.6096	1.19186	0.268869	1.13984e-06	8.58733e-06	UniRef100_I1JXA2 Uncharacterized protein n=3 Tax=Glycine max TaxID=3847 RepID=I1JXA2_SOYBN
Glyma.19G229400	19.9982	1.18995	0.497861	0.00161305	0.00655548	UniRef100_I1NBS5 Uncharacterized protein n=1 Tax=Glycine max TaxID=3847 RepID=I1NBS5_SOYBN
Glyma.01G225100	349.554	1.18975	0.118937	1.99203e-24	5.85404e-23	UniRef100_K7K5B2 PPM-type phosphatase domain-containing protein n=2 Tax=Soja TaxID=1462606 RepID=K7K5B2_SOYBN
Glyma.10G186800	452.646	1.1895	0.118942	1.94791e-24	5.72904e-23	UniRef100_I1LCB7 AP2/ERF domain-containing protein n=2 Tax=Soja TaxID=1462606 RepID=I1LCB7_SOYBN
Glyma.13G039900	39.6969	1.18807	0.343295	6.22892e-05	0.000347605	UniRef100_A0A0R0GI21 Protein kinase domain-containing protein n=1 Tax=Glycine max TaxID=3847 RepID=A0A0R0GI21_SOYBN
Glyma.03G210100	28.7442	1.18786	0.437685	0.000655717	0.00295183	UniRef100_A0A0B2R3K6 Glutaredoxin-C13 n=2 Tax=Soja TaxID=1462606 RepID=A0A0B2R3K6_GLYSO
Glyma.08G309900	185.742	1.18743	0.16327	4.9422e-14	7.87721e-13	UniRef100_I1KY25 Hexosyltransferase n=1 Tax=Glycine max TaxID=3847 RepID=I1KY25_SOYBN
Glyma.12G015800	87.0628	1.18695	0.247388	2.18351e-07	1.82847e-06	UniRef100_K7LSG1 Uncharacterized protein n=1 Tax=Glycine max TaxID=3847 RepID=K7LSG1_SOYBN
Glyma.08G021800	82.1303	1.18442	0.226981	2.37107e-08	2.23885e-07	UniRef100_I1KPI9 Uncharacterized protein n=1 Tax=Glycine max TaxID=3847 RepID=I1KPI9_SOYBN
Glyma.04G101900	40.0988	1.18419	0.349137	8.25406e-05	0.000448558	UniRef100_I1JVE3 Uncharacterized protein n=1 Tax=Glycine max TaxID=3847 RepID=I1JVE3_SOYBN
Glyma.14G023000	1848.08	1.18307	0.0887148	1.9408e-41	1.10041e-39	UniRef100_B0ZSJ5 Geranyl-diphosphate synthase n=2 Tax=Soja TaxID=1462606 RepID=B0ZSJ5_SOYBN
Glyma.13G157300	450.142	1.18286	0.11475	9.55827e-26	2.97344e-24	UniRef100_I1LZN4 Uncharacterized protein n=1 Tax=Glycine max TaxID=3847 RepID=I1LZN4_SOYBN
Glyma.02G047000	743.031	1.18212	0.10113	2.09447e-32	8.92053e-31	UniRef100_I1JCG1 Rhodanese domain-containing protein n=2 Tax=Soja TaxID=1462606 RepID=I1JCG1_SOYBN
Glyma.14G206100	115.095	1.18212	0.213052	3.77416e-09	3.90598e-08	UniRef100_I1MBM0 Uncharacterized protein n=3 Tax=Soja TaxID=1462606 RepID=I1MBM0_SOYBN
Glyma.17G014100	138.903	1.18177	0.184199	1.91424e-11	2.4968e-10	UniRef100_C6TMD3 Uncharacterized protein n=1 Tax=Glycine max TaxID=3847 RepID=C6TMD3_SOYBN
Glyma.11G159021	878.294	1.18171	0.0843759	2.0092e-45	1.26864e-43	UniRef100_A0A445I3F7 Uncharacterized protein n=1 Tax=Glycine soja TaxID=3848 RepID=A0A445I3F7_GLYSO
Glyma.06G084300	1135.79	1.18138	0.101101	2.09031e-32	8.91333e-31	UniRef100_I1K9C5 Protein kinase domain-containing protein n=2 Tax=Soja TaxID=1462606 RepID=I1K9C5_SOYBN
Glyma.05G160400	191.122	1.18108	0.153514	1.89592e-15	3.38149e-14	UniRef100_A0A0R0K2K5 Uncharacterized protein n=1 Tax=Glycine max TaxID=3847 RepID=A0A0R0K2K5_SOYBN
Glyma.02G060900	40.4275	1.18102	0.3444	6.78374e-05	0.000375377	UniRef100_A0A445LKK3 Uncharacterized protein n=1 Tax=Glycine soja TaxID=3848 RepID=A0A445LKK3_GLYSO
Glyma.15G083200	537.554	1.18087	0.111574	4.94682e-27	1.63612e-25	UniRef100_I1MES6 Uncharacterized protein n=3 Tax=Soja TaxID=1462606 RepID=I1MES6_SOYBN
Glyma.04G230400	141.005	1.17983	0.178515	5.2988e-12	7.25461e-11	UniRef100_A0A0B2QH19 Uncharacterized protein n=2 Tax=Soja TaxID=1462606 RepID=A0A0B2QH19_GLYSO
Glyma.13G030200	2190.39	1.1793	0.174227	1.68541e-12	2.39842e-11	UniRef100_K7K8V1 Bet_v_1 domain-containing protein n=4 Tax=Soja TaxID=1462606 RepID=K7K8V1_SOYBN
Glyma.06G221700	450.033	1.17776	0.115662	3.23475e-25	9.82586e-24	UniRef100_A0A0R0JWJ9 Peroxidase n=3 Tax=Soja TaxID=1462606 RepID=A0A0R0JWJ9_SOYBN
Glyma.03G249900	56.3025	1.17696	0.315657	2.26255e-05	0.000137988	UniRef100_A0A0B2RDP7 Peroxygenase 2 n=2 Tax=Soja TaxID=1462606 RepID=A0A0B2RDP7_GLYSO
Glyma.20G125500	209.006	1.17623	0.150765	8.62164e-16	1.57029e-14	UniRef100_A0A0R0EAH8 Uncharacterized protein n=2 Tax=Soja TaxID=1462606 RepID=A0A0R0EAH8_SOYBN
Glyma.11G211643	62.9915	1.17617	0.266929	1.30172e-06	9.69562e-06	UniRef100_Q0PJI0 MYB transcription factor MYB173 n=1 Tax=Glycine max TaxID=3847 RepID=Q0PJI0_SOYBN
Glyma.10G257200	1349.71	1.17587	0.0763148	2.097e-54	1.68305e-52	UniRef100_I1LEE3 Uncharacterized protein n=2 Tax=Soja TaxID=1462606 RepID=I1LEE3_SOYBN
Glyma.09G209900	1478.99	1.17551	0.0794395	2.149e-50	1.53999e-48	UniRef100_A0A445J401 Extra-large guanine nucleotide-binding protein 3 isoform A n=2 Tax=Soja TaxID=1462606 RepID=A0A445J401_GLYSO
Glyma.15G160900	43.5772	1.17384	0.3431	7.4245e-05	0.000407029	UniRef100_A0A0B2PC66 Disease resistance-like protein DSC1 n=2 Tax=Soja TaxID=1462606 RepID=A0A0B2PC66_GLYSO
Glyma.14G010700	40.7485	1.17366	0.346974	8.5311e-05	0.00046257	UniRef100_I1M6D3 Uncharacterized protein n=1 Tax=Glycine max TaxID=3847 RepID=I1M6D3_SOYBN
Glyma.02G023500	166.448	1.17254	0.160736	4.23152e-14	6.77738e-13	UniRef100_A0A0B2R505 DnaJ-like subfamily B member 13 n=2 Tax=Soja TaxID=1462606 RepID=A0A0B2R505_GLYSO
Glyma.10G181200	256.474	1.17113	0.137656	2.55605e-18	5.38605e-17	UniRef100_I1LC58 ALOG domain-containing protein n=2 Tax=Soja TaxID=1462606 RepID=I1LC58_SOYBN
Glyma.04G088700	90.6149	1.16974	0.22413	2.52915e-08	2.37631e-07	UniRef100_K7KJ03 Protein kinase domain-containing protein n=2 Tax=Soja TaxID=1462606 RepID=K7KJ03_SOYBN
Glyma.19G247200	360.536	1.16933	0.117174	2.87537e-24	8.39529e-23	UniRef100_I1NCC0 Uncharacterized protein n=1 Tax=Glycine max TaxID=3847 RepID=I1NCC0_SOYBN
Glyma.05G218400	266.387	1.16788	0.133276	2.70774e-19	6.07802e-18	UniRef100_I1K681 Glutaredoxin domain-containing protein n=2 Tax=Soja TaxID=1462606 RepID=I1K681_SOYBN
Glyma.13G209800	359.917	1.16783	0.121749	1.1407e-22	3.07453e-21	UniRef100_I1M159 Uncharacterized protein n=3 Tax=Glycine max TaxID=3847 RepID=I1M159_SOYBN
Glyma.19G264200	135.999	1.16759	0.17571	4.18658e-12	5.78007e-11	UniRef100_I1MGB3 Uncharacterized protein n=2 Tax=Soja TaxID=1462606 RepID=I1MGB3_SOYBN
Glyma.13G306600	40.0007	1.1675	0.344281	8.37674e-05	0.000455088	UniRef100_C6T3E7 Uncharacterized protein n=2 Tax=Soja TaxID=1462606 RepID=C6T3E7_SOYBN
Glyma.07G183100	202.331	1.16632	0.152609	3.03197e-15	5.32356e-14	UniRef100_I1KL62 Glutamine amidotransferase type-1 domain-containing protein n=2 Tax=Soja TaxID=1462606 RepID=I1KL62_SOYBN
Glyma.18G150000	112.241	1.16587	0.204782	1.7139e-09	1.83791e-08	UniRef100_C6ZJZ0 Serine hydroxymethyltransferase n=2 Tax=Soja TaxID=1462606 RepID=C6ZJZ0_SOYBN
Glyma.09G080100	18480.8	1.16497	0.0551954	1.0258e-99	2.27292e-97	UniRef100_A0A0R0IBM9 CMP/dCMP-type deaminase domain-containing protein n=4 Tax=Soja TaxID=1462606 RepID=A0A0R0IBM9_SOYBN
Glyma.08G076300	13148.7	1.16492	0.0822393	2.13266e-46	1.37791e-44	UniRef100_I1KR70 Uncharacterized protein n=1 Tax=Glycine max TaxID=3847 RepID=I1KR70_SOYBN
Glyma.02G178100	36.8471	1.16471	0.359897	0.000135557	0.000707236	UniRef100_A0A0B2RTW6 Myb family transcription factor APL n=2 Tax=Soja TaxID=1462606 RepID=A0A0B2RTW6_GLYSO
Glyma.02G141700	41.6155	1.16394	0.333535	6.05038e-05	0.000338583	UniRef100_I1JF41 Uncharacterized protein n=2 Tax=Soja TaxID=1462606 RepID=I1JF41_SOYBN
Glyma.01G180800	50.053	1.16381	0.320088	3.39048e-05	0.000199762	UniRef100_C6TKL8 Uncharacterized protein n=2 Tax=Soja TaxID=1462606 RepID=C6TKL8_SOYBN
Glyma.08G218600	3938.77	1.1638	0.0584383	4.07851e-89	7.22076e-87	UniRef100_B0LUR7 Transcription factor n=2 Tax=Soja TaxID=1462606 RepID=B0LUR7_SOYBN
Glyma.04G079600	505.084	1.16321	0.123632	7.26411e-22	1.86599e-20	UniRef100_I1JUR2 BURP domain-containing protein n=1 Tax=Glycine max TaxID=3847 RepID=I1JUR2_SOYBN
Glyma.18G119000	122.926	1.16222	0.188802	1.04012e-10	1.26655e-09	UniRef100_I1N146 Uncharacterized protein n=1 Tax=Glycine max TaxID=3847 RepID=I1N146_SOYBN
Glyma.07G018600	340.788	1.16189	0.121479	1.62893e-22	4.33864e-21	UniRef100_A0A0B2P977 Peroxyureidoacrylate/ureidoacrylate amidohydrolase RutB n=4 Tax=Soja TaxID=1462606 RepID=A0A0B2P977_GLYSO
Glyma.17G160200	526.311	1.16116	0.119271	3.09078e-23	8.59352e-22	UniRef100_A0A0B2QU16 CYSTM domain-containing protein n=1 Tax=Glycine soja TaxID=3848 RepID=A0A0B2QU16_GLYSO
Glyma.08G122167	157.555	1.15909	0.171499	2.00108e-12	2.83313e-11	UniRef100_A0A0R0IKR3 Uncharacterized protein n=2 Tax=Soja TaxID=1462606 RepID=A0A0R0IKR3_SOYBN
Glyma.08G195300	42.4857	1.15902	0.318254	3.48101e-05	0.000204762	UniRef100_I1KUW8 Dof-type domain-containing protein n=2 Tax=Glycine max TaxID=3847 RepID=I1KUW8_SOYBN
Glyma.01G168200	129.535	1.15837	0.210525	5.28313e-09	5.37436e-08	UniRef100_K7K4A0 Kinesin-like protein n=1 Tax=Glycine max TaxID=3847 RepID=K7K4A0_SOYBN
Glyma.16G199900	725.468	1.15809	0.0943706	1.81105e-35	8.64064e-34	UniRef100_A0A0B2QNN0 LysM domain-containing protein n=2 Tax=Soja TaxID=1462606 RepID=A0A0B2QNN0_GLYSO
Glyma.01G131900	22.7965	1.15793	0.444682	0.00097789	0.0042121	UniRef100_A0A0B2PYB4 Transcription repressor OFP2 n=2 Tax=Soja TaxID=1462606 RepID=A0A0B2PYB4_GLYSO
Glyma.17G167300	18.3386	1.15791	0.507845	0.00231935	0.00902963	UniRef100_K7MM21 Uncharacterized protein n=1 Tax=Glycine max TaxID=3847 RepID=K7MM21_SOYBN
Glyma.18G002200	1062.16	1.15772	0.0805044	1.03266e-47	7.02384e-46	UniRef100_A0A445FM27 UDP-glucuronate 4-epimerase 6 n=1 Tax=Glycine soja TaxID=3848 RepID=A0A445FM27_GLYSO
Glyma.09G017600	38.8235	1.15771	0.361494	0.000161692	0.000829402	UniRef100_I1L079 Uncharacterized protein n=2 Tax=Soja TaxID=1462606 RepID=I1L079_SOYBN
Glyma.18G252400	79.8524	1.15721	0.247004	3.60792e-07	2.9158e-06	UniRef100_K7MUN3 AP2/ERF domain-containing protein n=2 Tax=Soja TaxID=1462606 RepID=K7MUN3_SOYBN
Glyma.02G002500	122.592	1.15701	0.200474	1.07569e-09	1.18015e-08	UniRef100_A0A0B2Q240 Protein argonaute 10 n=3 Tax=Soja TaxID=1462606 RepID=A0A0B2Q240_GLYSO
Glyma.03G021300	150.114	1.1556	0.179647	1.63053e-11	2.13911e-10	UniRef100_A0A0B2P4D9 Uncharacterized protein n=2 Tax=Soja TaxID=1462606 RepID=A0A0B2P4D9_GLYSO
Glyma.02G291200	113.353	1.15484	0.19518	4.47999e-10	5.12686e-09	UniRef100_A0A0R0LCQ0 RING-type domain-containing protein n=2 Tax=Soja TaxID=1462606 RepID=A0A0R0LCQ0_SOYBN
Glyma.14G195000	624.35	1.15288	0.104364	3.08648e-29	1.13518e-27	UniRef100_I1MBC5 Asparagine synthetase [glutamine-hydrolyzing] n=2 Tax=Soja TaxID=1462606 RepID=I1MBC5_SOYBN
Glyma.12G000226	17.9569	1.15244	0.506266	0.00232533	0.00904901	UniRef100_A0A445HIK3 Glutamate receptor 3.2 isoform C n=1 Tax=Glycine soja TaxID=3848 RepID=A0A445HIK3_GLYSO
Glyma.01G031900	2822.45	1.15158	0.0648227	1.86382e-71	2.37026e-69	UniRef100_K7K1I3 Glyco_transf_20 domain-containing protein n=2 Tax=Soja TaxID=1462606 RepID=K7K1I3_SOYBN
Glyma.18G259400	29.5623	1.15085	0.390475	0.000380935	0.00180836	UniRef100_C6TBV2 Uncharacterized protein n=2 Tax=Soja TaxID=1462606 RepID=C6TBV2_SOYBN
Glyma.06G144100	722.778	1.14997	0.092127	1.26154e-36	6.35467e-35	UniRef100_I1KB92 Alpha-galactosidase n=4 Tax=Soja TaxID=1462606 RepID=I1KB92_SOYBN
Glyma.04G064100	2664.66	1.14797	0.0669353	9.1302e-67	1.02091e-64	UniRef100_I1JU99 Uncharacterized protein n=1 Tax=Glycine max TaxID=3847 RepID=I1JU99_SOYBN
Glyma.01G178500	645.286	1.14769	0.101505	1.70278e-30	6.64138e-29	UniRef100_I1J8Z1 MCU domain-containing protein n=3 Tax=Soja TaxID=1462606 RepID=I1J8Z1_SOYBN
Glyma.12G221500	2538.56	1.14709	0.0625109	4.44294e-76	6.07824e-74	UniRef100_A0A0K2CTP6 NAC transcription factor n=1 Tax=Glycine max TaxID=3847 RepID=A0A0K2CTP6_SOYBN
Glyma.15G028400	242.007	1.14702	0.143186	1.57011e-16	2.97834e-15	UniRef100_K7M982 Uncharacterized protein n=1 Tax=Glycine max TaxID=3847 RepID=K7M982_SOYBN
Glyma.20G111800	237.086	1.14661	0.142708	1.37242e-16	2.61295e-15	UniRef100_Q8S8Z9 Syringolide-induced protein 1-3-1B n=2 Tax=Soja TaxID=1462606 RepID=Q8S8Z9_SOYBN
Glyma.16G149900	430.62	1.14639	0.115174	3.91277e-24	1.13508e-22	UniRef100_A0A445GIW2 zf-C3Hc3H domain-containing protein n=3 Tax=Soja TaxID=1462606 RepID=A0A445GIW2_GLYSO
Glyma.18G197400	83.0151	1.14618	0.228231	6.94254e-08	6.19426e-07	UniRef100_I1N2U5 Laccase n=1 Tax=Glycine max TaxID=3847 RepID=I1N2U5_SOYBN
Glyma.09G117900	42.3069	1.14544	0.339207	9.26154e-05	0.00049836	UniRef100_A0A0B2Q3V9 Auxin efflux carrier component n=2 Tax=Soja TaxID=1462606 RepID=A0A0B2Q3V9_GLYSO
Glyma.09G000600	46.2349	1.14381	0.299575	1.71902e-05	0.000106659	UniRef100_K7LB09 FAD_binding_3 domain-containing protein n=1 Tax=Glycine max TaxID=3847 RepID=K7LB09_SOYBN
Glyma.02G052300	75.8134	1.1438	0.233473	1.34174e-07	1.15711e-06	UniRef100_I1JCL2 AB hydrolase-1 domain-containing protein n=2 Tax=Soja TaxID=1462606 RepID=I1JCL2_SOYBN
Glyma.13G286600	290.695	1.14357	0.131921	6.34759e-19	1.39112e-17	UniRef100_C6SXG3 Thioredoxin n=2 Tax=Soja TaxID=1462606 RepID=C6SXG3_SOYBN
Glyma.19G025100	53.7032	1.14307	0.302266	2.07772e-05	0.000127357	UniRef100_I1N671 Glycosyltransferase n=2 Tax=Soja TaxID=1462606 RepID=I1N671_SOYBN
Glyma.06G298600	846.146	1.14282	0.0963105	2.76537e-33	1.2121e-31	UniRef100_A0A445KGJ1 Uncharacterized protein n=2 Tax=Soja TaxID=1462606 RepID=A0A445KGJ1_GLYSO
Glyma.06G170700	178.054	1.14242	0.156383	3.9651e-14	6.36196e-13	UniRef100_I1KC37 Uncharacterized protein n=1 Tax=Glycine max TaxID=3847 RepID=I1KC37_SOYBN
Glyma.15G256000	93.7649	1.14228	0.255031	9.50101e-07	7.25625e-06	UniRef100_K7MDY4 CYSTM domain-containing protein n=2 Tax=Soja TaxID=1462606 RepID=K7MDY4_SOYBN
Glyma.05G135000	33.3243	1.14217	0.355782	0.000164261	0.000841148	UniRef100_UPI0003DEC423 uncharacterized protein LOC100802419 n=1 Tax=Glycine max TaxID=3847 RepID=UPI0003DEC423
Glyma.12G221900	26.1202	1.14176	0.407139	0.00057829	0.00264247	UniRef100_A0A445HTS0 COP1-interacting protein 7 isoform A n=2 Tax=Glycine soja TaxID=3848 RepID=A0A445HTS0_GLYSO
Glyma.16G172400	25.6566	1.14065	0.450481	0.00116624	0.00492849	UniRef100_A0A0R0FZK9 Uncharacterized protein n=3 Tax=Glycine max TaxID=3847 RepID=A0A0R0FZK9_SOYBN
Glyma.04G013800	959.896	1.13995	0.0920136	4.10642e-36	2.01237e-34	UniRef100_K7KHK3 Tify domain-containing protein n=1 Tax=Glycine max TaxID=3847 RepID=K7KHK3_SOYBN
Glyma.10G211200	113.8	1.13989	0.2081	6.24998e-09	6.28951e-08	UniRef100_I1LD14 Hydrolase_4 domain-containing protein n=1 Tax=Glycine max TaxID=3847 RepID=I1LD14_SOYBN
Glyma.10G275000	4539.56	1.13973	0.0613783	5.84914e-79	8.48407e-77	UniRef100_A0A0R0I040 Uncharacterized protein n=2 Tax=Soja TaxID=1462606 RepID=A0A0R0I040_SOYBN
Glyma.04G051900	355.189	1.13864	0.120695	5.43907e-22	1.40718e-20	UniRef100_K7KI77 Glutaredoxin domain-containing protein n=1 Tax=Glycine max TaxID=3847 RepID=K7KI77_SOYBN
Glyma.20G227900	178.769	1.13757	0.161977	3.32587e-13	4.99877e-12	UniRef100_A0A0B2Q416 Zeta-carotene desaturase n=2 Tax=Soja TaxID=1462606 RepID=A0A0B2Q416_GLYSO
Glyma.16G151800	179.246	1.13725	0.17838	2.53908e-11	3.28218e-10	UniRef100_A0A0B2RE61 Dynein light chain n=2 Tax=Soja TaxID=1462606 RepID=A0A0B2RE61_GLYSO
Glyma.01G115900	63.4957	1.13616	0.25686	1.32195e-06	9.83824e-06	UniRef100_I1J7A8 Chlorophyll a-b binding protein, chloroplastic n=3 Tax=Soja TaxID=1462606 RepID=I1J7A8_SOYBN
Glyma.13G199300	193.627	1.13552	0.153077	1.78428e-14	2.94798e-13	UniRef100_I1M0U5 Uncharacterized protein n=1 Tax=Glycine max TaxID=3847 RepID=I1M0U5_SOYBN
Glyma.19G006400	9158.98	1.13543	0.0717405	3.02324e-57	2.60597e-55	UniRef100_A0A0D2QWC9 Uncharacterized protein n=1 Tax=Gossypium raimondii TaxID=29730 RepID=A0A0D2QWC9_GOSRA
Glyma.13G137000	861.948	1.13509	0.10994	8.61466e-26	2.68684e-24	UniRef100_A0A0R0GVB6 PWWP domain-containing protein n=1 Tax=Glycine max TaxID=3847 RepID=A0A0R0GVB6_SOYBN
Glyma.06G174700	87.7367	1.13466	0.242132	3.96104e-07	3.18338e-06	UniRef100_I1KC87 Pectate lyase n=2 Tax=Soja TaxID=1462606 RepID=I1KC87_SOYBN
Glyma.02G262500	1414.08	1.13384	0.0739595	7.29093e-54	5.73696e-52	UniRef100_I1JIE1 Ferritin n=2 Tax=Soja TaxID=1462606 RepID=I1JIE1_SOYBN
Glyma.07G136650	30.5567	1.13359	0.372617	0.00028735	0.00139717	UniRef100_A0A445JWH3 Transcription factor bHLH155 isoform D n=1 Tax=Glycine soja TaxID=3848 RepID=A0A445JWH3_GLYSO
Glyma.08G285500	39.7173	1.13234	0.349096	0.000150939	0.000780453	UniRef100_C6TE57 Uncharacterized protein n=3 Tax=Soja TaxID=1462606 RepID=C6TE57_SOYBN
Glyma.15G003300	917.568	1.13191	0.0876292	5.93423e-39	3.20848e-37	UniRef100_I1MCA9 WRKY domain-containing protein n=2 Tax=Glycine max TaxID=3847 RepID=I1MCA9_SOYBN
Glyma.11G149900	43.6468	1.13123	0.307601	3.05499e-05	0.000181326	UniRef100_A0A0B2Q161 Polyadenylate-binding protein-interacting protein 2 n=2 Tax=Soja TaxID=1462606 RepID=A0A0B2Q161_GLYSO
Glyma.16G017400	2729.21	1.13034	0.0709889	6.60196e-58	5.80153e-56	UniRef100_I1MKB1 HTH myb-type domain-containing protein n=1 Tax=Glycine max TaxID=3847 RepID=I1MKB1_SOYBN
Glyma.09G038300	396.291	1.12997	0.115293	1.61246e-23	4.52855e-22	UniRef100_I1L0T3 Uncharacterized protein n=1 Tax=Glycine max TaxID=3847 RepID=I1L0T3_SOYBN
Glyma.02G255000	9879.33	1.12956	0.0730927	1.07414e-54	8.69838e-53	UniRef100_A0A0R0LB64 Uncharacterized protein n=1 Tax=Glycine max TaxID=3847 RepID=A0A0R0LB64_SOYBN
Glyma.11G106900	236.629	1.12952	0.14152	2.20827e-16	4.15612e-15	UniRef100_I1LJ15 Senescence domain-containing protein n=3 Tax=Soja TaxID=1462606 RepID=I1LJ15_SOYBN
Glyma.05G094400	938.063	1.1293	0.0831077	6.44377e-43	3.77808e-41	UniRef100_I1K249 Protein kinase domain-containing protein n=2 Tax=Soja TaxID=1462606 RepID=I1K249_SOYBN
Glyma.05G188500	352.192	1.12924	0.126346	5.46755e-20	1.27813e-18	UniRef100_A0A0B2RP85 Carbamoyl-phosphate synthase small chain n=3 Tax=Soja TaxID=1462606 RepID=A0A0B2RP85_GLYSO
Glyma.02G291800	783.731	1.12896	0.0962993	1.32674e-32	5.70449e-31	UniRef100_I1JJB0 Uncharacterized protein n=1 Tax=Glycine max TaxID=3847 RepID=I1JJB0_SOYBN
Glyma.08G180100	24.5724	1.12807	0.452162	0.00133812	0.0055627	UniRef100_K7L7E7 J domain-containing protein n=1 Tax=Glycine max TaxID=3847 RepID=K7L7E7_SOYBN
Glyma.08G063167	488.491	1.12788	0.419288	0.000754798	0.0033482	UniRef100_UPI00071923FC putative branched-chain-amino-acid aminotransferase 7 n=1 Tax=Glycine max TaxID=3847 RepID=UPI00071923FC
Glyma.13G329700	1444.23	1.125	0.10789	2.70544e-26	8.58633e-25	UniRef100_I1M4P4 Uncharacterized protein n=10 Tax=Soja TaxID=1462606 RepID=I1M4P4_SOYBN
Glyma.15G132400	155.728	1.12462	0.19053	5.49233e-10	6.22229e-09	UniRef100_I1MG62 Uncharacterized protein n=2 Tax=Soja TaxID=1462606 RepID=I1MG62_SOYBN
Glyma.14G171700	151.602	1.1244	0.185997	2.00793e-10	2.38162e-09	UniRef100_A0A0B2QNU5 Trehalose 6-phosphate phosphatase n=2 Tax=Soja TaxID=1462606 RepID=A0A0B2QNU5_GLYSO
Glyma.08G333700	479.606	1.1242	0.107712	2.5058e-26	7.95972e-25	UniRef100_A0A445JNR6 TPR_REGION domain-containing protein n=2 Tax=Soja TaxID=1462606 RepID=A0A445JNR6_GLYSO
Glyma.03G198600	410.431	1.12407	0.11786	2.14407e-22	5.66893e-21	UniRef100_I1JQ53 Uncharacterized protein n=1 Tax=Glycine max TaxID=3847 RepID=I1JQ53_SOYBN
Glyma.06G020800	1237.81	1.1236	0.0827319	7.96042e-43	4.65221e-41	UniRef100_A0A0R0JGR0 Uncharacterized protein n=2 Tax=Soja TaxID=1462606 RepID=A0A0R0JGR0_SOYBN
Glyma.14G091000	295.722	1.12348	0.13165	2.11506e-18	4.48032e-17	UniRef100_I1M8Y0 Homeobox domain-containing protein n=2 Tax=Soja TaxID=1462606 RepID=I1M8Y0_SOYBN
Glyma.04G082900	1861.1	1.12188	0.0736518	3.27396e-53	2.53203e-51	UniRef100_A0A445KXF0 Casein kinase 1-like protein 4 isoform A n=2 Tax=Soja TaxID=1462606 RepID=A0A445KXF0_GLYSO
Glyma.04G089900	246.099	1.12187	0.137499	4.85178e-17	9.45666e-16	UniRef100_C6TKM2 Auxin-induced protein n=1 Tax=Glycine max TaxID=3847 RepID=C6TKM2_SOYBN
Glyma.06G196900	1980.88	1.12176	0.065052	2.03412e-67	2.36227e-65	UniRef100_A0A0R0JPU0 Protein kinase domain-containing protein n=1 Tax=Glycine max TaxID=3847 RepID=A0A0R0JPU0_SOYBN
Glyma.10G047750	45.4773	1.12143	0.306861	3.31564e-05	0.000195704	UniRef100_A0A445IIF0 Glutathione S-transferase L3 isoform A n=2 Tax=Glycine soja TaxID=3848 RepID=A0A445IIF0_GLYSO
Glyma.01G210200	167.18	1.12032	0.18045	7.52744e-11	9.28196e-10	UniRef100_A0A445M6R0 Autophagy-related protein n=3 Tax=Soja TaxID=1462606 RepID=A0A445M6R0_GLYSO
Glyma.01G216600	1446.71	1.1203	0.0890843	4.61083e-37	2.35543e-35	UniRef100_I1JA40 Protein DETOXIFICATION n=2 Tax=Soja TaxID=1462606 RepID=I1JA40_SOYBN
Glyma.10G185200	169.067	1.1201	0.174276	1.89548e-11	2.47412e-10	UniRef100_K7LK80 Zeta_toxin domain-containing protein n=2 Tax=Soja TaxID=1462606 RepID=K7LK80_SOYBN
Glyma.09G210400	25.2042	1.1201	0.43778	0.00116266	0.00491536	UniRef100_K7LF59 Uncharacterized protein n=1 Tax=Glycine max TaxID=3847 RepID=K7LF59_SOYBN
Glyma.08G116366	46.4428	1.12001	0.299961	2.45497e-05	0.000148769	UniRef100_A0A0R0ITP6 Uncharacterized protein n=1 Tax=Glycine max TaxID=3847 RepID=A0A0R0ITP6_SOYBN
Glyma.U031113	612.195	1.11919	0.0980737	5.68804e-31	2.28515e-29	UniRef100_A0A445KG13 Xyloglucan endotransglucosylase/hydrolase n=2 Tax=Glycine soja TaxID=3848 RepID=A0A445KG13_GLYSO
Glyma.02G136200	179.851	1.11851	0.178911	5.99192e-11	7.47273e-10	UniRef100_C6T994 Fe2OG dioxygenase domain-containing protein n=2 Tax=Soja TaxID=1462606 RepID=C6T994_SOYBN
Glyma.07G048500	756.662	1.11828	0.0970756	1.54045e-31	6.33673e-30	UniRef100_K7KZP5 HTH myb-type domain-containing protein n=3 Tax=Glycine max TaxID=3847 RepID=K7KZP5_SOYBN
Glyma.10G113700	20.2003	1.11823	0.48612	0.00225898	0.00883446	UniRef100_A0A0B2R602 Uncharacterized protein n=2 Tax=Soja TaxID=1462606 RepID=A0A0B2R602_GLYSO
Glyma.20G006400	2261.39	1.11677	0.0733684	4.07304e-53	3.12992e-51	UniRef100_I1ND03 SBP-type domain-containing protein n=1 Tax=Glycine max TaxID=3847 RepID=I1ND03_SOYBN
Glyma.11G075100	401.065	1.1167	0.111539	2.13208e-24	6.25543e-23	UniRef100_A0A445HYA9 Kinesin-like protein n=3 Tax=Soja TaxID=1462606 RepID=A0A445HYA9_GLYSO
Glyma.06G012200	47.6767	1.11622	0.302174	2.92547e-05	0.000174212	UniRef100_I1K770 BHLH domain-containing protein n=2 Tax=Soja TaxID=1462606 RepID=I1K770_SOYBN
Glyma.15G160400	322.159	1.11565	0.124889	6.1191e-20	1.42399e-18	UniRef100_A0A0B2SS46 Ankyrin repeat and death domain-containing protein 1B n=2 Tax=Soja TaxID=1462606 RepID=A0A0B2SS46_GLYSO
Glyma.17G197500	713.047	1.11484	0.103291	5.66926e-28	1.96127e-26	UniRef100_A0A0R0FFN4 WRKY domain-containing protein n=3 Tax=Soja TaxID=1462606 RepID=A0A0R0FFN4_SOYBN
Glyma.04G167200	37.4052	1.11461	0.34089	0.00013755	0.00071718	UniRef100_A0A0B2R0R5 NAC domain-containing protein 100 n=2 Tax=Soja TaxID=1462606 RepID=A0A0B2R0R5_GLYSO
Glyma.14G111300	1628.81	1.11429	0.0727215	8.36425e-54	6.56721e-52	UniRef100_I1M9F3 DUF862 domain-containing protein n=2 Tax=Soja TaxID=1462606 RepID=I1M9F3_SOYBN
Glyma.01G205700	22.9717	1.11409	0.443869	0.00137625	0.00570218	UniRef100_I1J9R9 FAD_binding_3 domain-containing protein n=2 Tax=Glycine max TaxID=3847 RepID=I1J9R9_SOYBN
Glyma.13G099600	1912.55	1.11392	0.0720808	1.00357e-54	8.14519e-53	UniRef100_K7LWU0 HMA domain-containing protein n=2 Tax=Glycine max TaxID=3847 RepID=K7LWU0_SOYBN
Glyma.07G041400	3528.04	1.11388	0.0591599	6.98779e-80	1.02593e-77	UniRef100_C6TCZ5 ZIM transcription factor n=2 Tax=Soja TaxID=1462606 RepID=C6TCZ5_SOYBN
Glyma.06G157400	3013.4	1.1131	0.0667618	2.95851e-63	3.00993e-61	UniRef100_U3LZE5 NAC transcription factor n=2 Tax=Soja TaxID=1462606 RepID=U3LZE5_SOYBN
Glyma.19G001600	141.014	1.11171	0.175912	3.93143e-11	5.00146e-10	UniRef100_I1N5L9 Protein DETOXIFICATION n=2 Tax=Soja TaxID=1462606 RepID=I1N5L9_SOYBN
Glyma.04G056800	53.5356	1.11102	0.286766	1.43704e-05	9.04365e-05	UniRef100_I1JU24 AB hydrolase-1 domain-containing protein n=2 Tax=Soja TaxID=1462606 RepID=I1JU24_SOYBN
Glyma.10G090700	449.462	1.11065	0.11779	6.22699e-22	1.60643e-20	UniRef100_K7LI87 Amino_oxidase domain-containing protein n=1 Tax=Glycine max TaxID=3847 RepID=K7LI87_SOYBN
Glyma.14G150800	43.4018	1.11049	0.323944	8.05327e-05	0.000438505	UniRef100_UPI00103DCF08 uncharacterized protein LOC114384584 isoform X1 n=1 Tax=Glycine soja TaxID=3848 RepID=UPI00103DCF08
Glyma.14G139400	168.411	1.11048	0.182763	1.86513e-10	2.21808e-09	UniRef100_A0A0B2P650 Uncharacterized protein n=2 Tax=Soja TaxID=1462606 RepID=A0A0B2P650_GLYSO
Glyma.11G045900	114.019	1.11026	0.207838	1.3255e-08	1.28656e-07	UniRef100_A0A0B2PUK9 BZIP transcription factor 2 n=2 Tax=Soja TaxID=1462606 RepID=A0A0B2PUK9_GLYSO
Glyma.04G180400	13220.8	1.10997	0.174636	2.95369e-11	3.79909e-10	UniRef100_I1JX51 BURP domain-containing protein n=1 Tax=Glycine max TaxID=3847 RepID=I1JX51_SOYBN
Glyma.13G171400	116.31	1.10916	0.224481	1.07625e-07	9.38914e-07	UniRef100_K7M098 Uncharacterized protein n=2 Tax=Soja TaxID=1462606 RepID=K7M098_SOYBN
Glyma.10G032200	35.4214	1.10708	0.358338	0.000250872	0.00123646	UniRef100_C6SWM3 Uncharacterized protein n=2 Tax=Soja TaxID=1462606 RepID=C6SWM3_SOYBN
Glyma.02G026500	623.738	1.10693	0.107151	7.96659e-26	2.49116e-24	UniRef100_I1JBV1 Glycosyltransferase family 92 protein n=2 Tax=Soja TaxID=1462606 RepID=I1JBV1_SOYBN
Glyma.20G094500	197.663	1.10663	0.14856	1.44539e-14	2.40567e-13	UniRef100_A0A0R4J650 Hexosyltransferase n=2 Tax=Soja TaxID=1462606 RepID=A0A0R4J650_SOYBN
Glyma.08G127000	8713.86	1.10628	0.0567107	1.41097e-85	2.31636e-83	UniRef100_A0A445JDV2 Serine/threonine-protein kinase SAPK7 isoform A n=1 Tax=Glycine soja TaxID=3848 RepID=A0A445JDV2_GLYSO
Glyma.15G162667	151.549	1.10572	0.186683	4.65421e-10	5.31613e-09	UniRef100_A0A445GUA8 Putative WRKY transcription factor 19 n=1 Tax=Glycine soja TaxID=3848 RepID=A0A445GUA8_GLYSO
Glyma.05G044000	150.118	1.10519	0.185502	3.94184e-10	4.53689e-09	UniRef100_I1K070 Pectate lyase n=1 Tax=Glycine max TaxID=3847 RepID=I1K070_SOYBN
Glyma.07G097200	33.2192	1.10454	0.366619	0.000330301	0.00158468	UniRef100_A0A0R0J5Q2 Uncharacterized protein n=1 Tax=Glycine max TaxID=3847 RepID=A0A0R0J5Q2_SOYBN
Glyma.08G022900	96.215	1.10384	0.209209	1.98677e-08	1.88882e-07	UniRef100_I1KPK2 RING-type domain-containing protein n=2 Tax=Soja TaxID=1462606 RepID=I1KPK2_SOYBN
Glyma.04G011000	107.97	1.10196	0.228471	2.04428e-07	1.71935e-06	UniRef100_I1JSM1 DUF4408 domain-containing protein n=2 Tax=Soja TaxID=1462606 RepID=I1JSM1_SOYBN
Glyma.15G244250	94.7414	1.1019	0.209115	2.01162e-08	1.91094e-07	UniRef100_A0A445GXV5 Cytochrome P450 72A68 isoform C n=2 Tax=Glycine soja TaxID=3848 RepID=A0A445GXV5_GLYSO
Glyma.14G175800	28.0566	1.10118	0.397109	0.00068053	0.0030506	UniRef100_I1MAV6 Uncharacterized protein n=1 Tax=Glycine max TaxID=3847 RepID=I1MAV6_SOYBN
Glyma.11G109100	175.585	1.09971	0.176194	5.97872e-11	7.45884e-10	UniRef100_I1LJ36 Uncharacterized protein n=1 Tax=Glycine max TaxID=3847 RepID=I1LJ36_SOYBN
Glyma.11G254300	104.621	1.09963	0.20439	1.12455e-08	1.10068e-07	UniRef100_I1LN34 Uncharacterized protein n=1 Tax=Glycine max TaxID=3847 RepID=I1LN34_SOYBN
Glyma.18G090800	63.3119	1.09962	0.288812	1.97007e-05	0.000121318	UniRef100_I1N0J7 Uncharacterized protein n=3 Tax=Soja TaxID=1462606 RepID=I1N0J7_SOYBN
Glyma.06G149600	236.548	1.09904	0.148254	1.8877e-14	3.11149e-13	UniRef100_K7KV53 WAT1-related protein n=2 Tax=Soja TaxID=1462606 RepID=K7KV53_SOYBN
Glyma.18G078600	106.475	1.09573	0.205012	1.34927e-08	1.30683e-07	UniRef100_I1N0B5 Uncharacterized protein n=1 Tax=Glycine max TaxID=3847 RepID=I1N0B5_SOYBN
Glyma.09G026900	93.5469	1.09349	0.219801	9.56789e-08	8.38543e-07	UniRef100_I1L0H6 FAD-binding PCMH-type domain-containing protein n=3 Tax=Soja TaxID=1462606 RepID=I1L0H6_SOYBN
Glyma.13G327400	923.689	1.09326	0.103172	5.12331e-27	1.6914e-25	UniRef100_K7M377 Uncharacterized protein n=2 Tax=Soja TaxID=1462606 RepID=K7M377_SOYBN
Glyma.04G092900	388.506	1.09324	0.143569	4.06808e-15	7.0638e-14	UniRef100_K7KJ30 Uncharacterized protein n=1 Tax=Glycine max TaxID=3847 RepID=K7KJ30_SOYBN
Glyma.06G130100	41.5659	1.09242	0.338787	0.000170621	0.000870631	UniRef100_A0A445K8X5 Protein ABIL2 isoform A n=1 Tax=Glycine soja TaxID=3848 RepID=A0A445K8X5_GLYSO
Glyma.03G256600	141.967	1.0918	0.17268	3.95127e-11	5.02493e-10	UniRef100_A0A0R0KPW5 Epimerase domain-containing protein n=1 Tax=Glycine max TaxID=3847 RepID=A0A0R0KPW5_SOYBN
Glyma.16G176800	133.48	1.09152	0.180598	2.38994e-10	2.81073e-09	UniRef100_K7MHZ7 LRRNT_2 domain-containing protein n=2 Tax=Soja TaxID=1462606 RepID=K7MHZ7_SOYBN
Glyma.10G238700	401.953	1.09077	0.112912	6.58254e-23	1.79971e-21	UniRef100_A0A0R0I5E7 F-box domain-containing protein n=1 Tax=Glycine max TaxID=3847 RepID=A0A0R0I5E7_SOYBN
Glyma.16G200700	70.3932	1.09069	0.248012	1.56448e-06	1.15173e-05	UniRef100_A0A0B2RGU6 MADS-box transcription factor 6 n=2 Tax=Soja TaxID=1462606 RepID=A0A0B2RGU6_GLYSO
Glyma.04G147700	4880.13	1.09004	0.0573487	2.33673e-81	3.5312e-79	UniRef100_I1JW65 Uncharacterized protein n=3 Tax=Soja TaxID=1462606 RepID=I1JW65_SOYBN
Glyma.05G089200	383.683	1.08991	0.112564	5.87818e-23	1.61324e-21	UniRef100_A0A0B2Q918 Cationic amino acid transporter 2, vacuolar n=2 Tax=Soja TaxID=1462606 RepID=A0A0B2Q918_GLYSO
Glyma.13G302900	66.366	1.08885	0.251024	2.1211e-06	1.53461e-05	UniRef100_I1M3Y7 Cytochrome b6-f complex iron-sulfur subunit n=2 Tax=Soja TaxID=1462606 RepID=I1M3Y7_SOYBN
Glyma.07G268400	142.993	1.08873	0.178647	1.73529e-10	2.07116e-09	UniRef100_A0A0B2SBY4 ADP-ribosylation factor GTPase-activating protein AGD12 n=2 Tax=Soja TaxID=1462606 RepID=A0A0B2SBY4_GLYSO
Glyma.20G051700	240.336	1.08806	0.145713	1.189e-14	1.99921e-13	UniRef100_I1NE62 Uncharacterized protein n=1 Tax=Glycine max TaxID=3847 RepID=I1NE62_SOYBN
Glyma.08G063100	673.899	1.08754	0.320563	8.7944e-05	0.000475419	UniRef100_A0A445JAP6 Zinc transporter ZTP29 isoform A n=3 Tax=Soja TaxID=1462606 RepID=A0A445JAP6_GLYSO
Glyma.03G022800	177.385	1.0869	0.176124	1.07703e-10	1.31062e-09	UniRef100_I1JKK7 Uncharacterized protein n=3 Tax=Soja TaxID=1462606 RepID=I1JKK7_SOYBN
Glyma.05G156300	20.8901	1.08667	0.465292	0.00218697	0.00858832	UniRef100_I1K3W8 Rieske domain-containing protein n=2 Tax=Soja TaxID=1462606 RepID=I1K3W8_SOYBN
Glyma.14G112600	139.562	1.08606	0.182797	4.20647e-10	4.82762e-09	UniRef100_A0A0B2P2X4 Hydroxyproline O-arabinosyltransferase 1 isoform A n=2 Tax=Soja TaxID=1462606 RepID=A0A0B2P2X4_GLYSO
Glyma.15G127900	43.1367	1.08493	0.328525	0.000126331	0.000662701	UniRef100_I1MG13 LOB domain-containing protein n=2 Tax=Soja TaxID=1462606 RepID=I1MG13_SOYBN
Glyma.17G067600	169.149	1.08372	0.214794	6.56164e-08	5.87764e-07	UniRef100_I1MSV3 Sialidase domain-containing protein n=2 Tax=Glycine max TaxID=3847 RepID=I1MSV3_SOYBN
Glyma.13G031600	48.7028	1.08366	0.316745	8.69322e-05	0.000470583	UniRef100_A0A0B2PC22 Amino acid permease 2 n=3 Tax=Soja TaxID=1462606 RepID=A0A0B2PC22_GLYSO
Glyma.04G222100	283.489	1.08364	0.128671	5.66816e-18	1.16981e-16	UniRef100_I1JYB5 Expansin n=2 Tax=Soja TaxID=1462606 RepID=I1JYB5_SOYBN
Glyma.18G278100	23.2868	1.08191	0.443848	0.00168261	0.00680371	UniRef100_I1N4U7 Uncharacterized protein n=1 Tax=Glycine max TaxID=3847 RepID=I1N4U7_SOYBN
Glyma.07G027500	98.8916	1.08098	0.239713	9.25187e-07	7.08244e-06	UniRef100_K7KZB7 Uncharacterized protein n=2 Tax=Glycine max TaxID=3847 RepID=K7KZB7_SOYBN
Glyma.14G212000	47.2658	1.08049	0.301148	4.53074e-05	0.000260361	UniRef100_C6T8Q3 C2H2-type domain-containing protein n=2 Tax=Soja TaxID=1462606 RepID=C6T8Q3_SOYBN
Glyma.08G057900	1933.5	1.08019	0.0723391	3.11063e-51	2.27884e-49	UniRef100_A0A0B2NX93 Uncharacterized protein n=1 Tax=Glycine soja TaxID=3848 RepID=A0A0B2NX93_GLYSO
Glyma.14G057400	29.5307	1.07965	0.380124	0.000571764	0.00261497	UniRef100_A0A0B2SPL2 Protein MALE DISCOVERER 2 n=1 Tax=Glycine soja TaxID=3848 RepID=A0A0B2SPL2_GLYSO
Glyma.18G002800	501.591	1.07874	0.114545	6.81313e-22	1.75263e-20	UniRef100_I1MYB0 Uncharacterized protein n=2 Tax=Soja TaxID=1462606 RepID=I1MYB0_SOYBN
Glyma.06G301102	280.506	1.07813	0.144382	1.2565e-14	2.10977e-13	NA
Glyma.13G210800	819.44	1.07757	0.0864326	1.76809e-36	8.82016e-35	UniRef100_A0A445I881 Glutamine synthetase n=2 Tax=Soja TaxID=1462606 RepID=A0A445I881_GLYSO
Glyma.03G022400	87.6021	1.07742	0.243553	1.41952e-06	1.05275e-05	UniRef100_K7KCD5 Uncharacterized protein n=2 Tax=Soja TaxID=1462606 RepID=K7KCD5_SOYBN
Glyma.19G008100	157.035	1.07735	0.173624	8.23471e-11	1.01092e-09	UniRef100_A0A0B2QPS6 GDSL esterase/lipase n=4 Tax=Soja TaxID=1462606 RepID=A0A0B2QPS6_GLYSO
Glyma.06G052000	989.714	1.07654	0.0857494	6.33762e-37	3.22388e-35	UniRef100_A0A0R0JK26 Uncharacterized protein n=3 Tax=Soja TaxID=1462606 RepID=A0A0R0JK26_SOYBN
Glyma.11G226000	70.7419	1.07619	0.251475	2.64333e-06	1.8836e-05	UniRef100_I1LMM0 Aa_trans domain-containing protein n=3 Tax=Soja TaxID=1462606 RepID=I1LMM0_SOYBN
Glyma.02G220300	149.088	1.07521	0.172358	7.18691e-11	8.89546e-10	UniRef100_I1JH62 C2 domain-containing protein n=1 Tax=Glycine max TaxID=3847 RepID=I1JH62_SOYBN
Glyma.17G059100	70.1154	1.07398	0.245524	1.79655e-06	1.31321e-05	UniRef100_I1MSL3 CCT domain-containing protein n=2 Tax=Soja TaxID=1462606 RepID=I1MSL3_SOYBN
Glyma.18G268400	552.796	1.07391	0.109936	2.5082e-23	7.00068e-22	UniRef100_I1N4L4 Uncharacterized protein n=1 Tax=Glycine max TaxID=3847 RepID=I1N4L4_SOYBN
Glyma.02G308900	26.9695	1.07207	0.414421	0.00115058	0.00486939	UniRef100_A0A0B2RDA2 Uncharacterized protein n=2 Tax=Soja TaxID=1462606 RepID=A0A0B2RDA2_GLYSO
Glyma.10G195500	52.4579	1.0718	0.279598	1.84205e-05	0.000113901	UniRef100_K7LKE2 RING-type domain-containing protein n=1 Tax=Glycine max TaxID=3847 RepID=K7LKE2_SOYBN
Glyma.05G068000	1127.22	1.07125	0.0844041	9.95244e-38	5.17198e-36	UniRef100_A0A0B2PLF9 Beta-amylase n=2 Tax=Soja TaxID=1462606 RepID=A0A0B2PLF9_GLYSO
Glyma.10G096600	59.9155	1.06971	0.26198	6.39944e-06	4.29288e-05	UniRef100_A0A0R0HRG3 Protein kinase domain-containing protein (Fragment) n=1 Tax=Glycine max TaxID=3847 RepID=A0A0R0HRG3_SOYBN
Glyma.12G204300	846.1	1.06963	0.0871751	2.22655e-35	1.05257e-33	UniRef100_I1LUG6 DUF1421 domain-containing protein n=3 Tax=Soja TaxID=1462606 RepID=I1LUG6_SOYBN
Glyma.07G086000	332.328	1.06751	0.127177	7.4036e-18	1.51413e-16	UniRef100_K7L0G9 MFS domain-containing protein n=2 Tax=Soja TaxID=1462606 RepID=K7L0G9_SOYBN
Glyma.18G249502	33.8068	1.0675	0.369044	0.000492681	0.00228394	UniRef100_B0LUR6 Transcription factor n=2 Tax=Soja TaxID=1462606 RepID=B0LUR6_SOYBN
Glyma.12G224300	306.648	1.06683	0.125732	3.43109e-18	7.17964e-17	UniRef100_I1LV06 Uncharacterized protein n=1 Tax=Glycine max TaxID=3847 RepID=I1LV06_SOYBN
Glyma.10G111700	65.5686	1.06661	0.253216	3.69061e-06	2.57921e-05	UniRef100_A0A0B2SIH3 AB hydrolase-1 domain-containing protein n=2 Tax=Soja TaxID=1462606 RepID=A0A0B2SIH3_GLYSO
Glyma.13G333200	101.41	1.06638	0.213703	9.30738e-08	8.16504e-07	UniRef100_Q0PJI3 MYB transcription factor MYB139 n=1 Tax=Glycine max TaxID=3847 RepID=Q0PJI3_SOYBN
Glyma.01G074500	474.284	1.06579	0.101245	1.09203e-26	3.53096e-25	UniRef100_A0A0R0LF09 Uncharacterized protein n=4 Tax=Soja TaxID=1462606 RepID=A0A0R0LF09_SOYBN
Glyma.19G114700	667.62	1.06399	0.0915891	5.25152e-32	2.20034e-30	UniRef100_C6T1W3 Uncharacterized protein n=2 Tax=Soja TaxID=1462606 RepID=C6T1W3_SOYBN
Glyma.17G223800	38.0082	1.06368	0.32869	0.000167175	0.000854856	UniRef100_K7MND6 PPM-type phosphatase domain-containing protein n=4 Tax=Soja TaxID=1462606 RepID=K7MND6_SOYBN
Glyma.17G211700	43.8446	1.06362	0.332297	0.000180337	0.000915165	UniRef100_A0A368UGX2 Protein kinase domain-containing protein n=2 Tax=Glycine max TaxID=3847 RepID=A0A368UGX2_SOYBN
Glyma.17G064900	454.311	1.06267	0.109692	5.38209e-23	1.47934e-21	UniRef100_A0A0R4J5H9 Xyloglucan endotransglucosylase/hydrolase n=2 Tax=Soja TaxID=1462606 RepID=A0A0R4J5H9_SOYBN
Glyma.03G165800	25.8904	1.06233	0.45141	0.00212996	0.00839731	UniRef100_A0A0R0KRM2 Protein kinase domain-containing protein n=2 Tax=Glycine max TaxID=3847 RepID=A0A0R0KRM2_SOYBN
Glyma.17G230600	1825.72	1.06206	0.0666857	6.54258e-58	5.76338e-56	UniRef100_I1MXD3 PPM-type phosphatase domain-containing protein n=2 Tax=Soja TaxID=1462606 RepID=I1MXD3_SOYBN
Glyma.07G055200	3243.77	1.06188	0.0721794	8.91679e-50	6.27773e-48	UniRef100_I1KHU7 BHLH domain-containing protein n=2 Tax=Soja TaxID=1462606 RepID=I1KHU7_SOYBN
Glyma.18G006600	119.91	1.0615	0.196385	1.01445e-08	9.96972e-08	UniRef100_A0A445FMA5 F-box protein isoform A n=2 Tax=Soja TaxID=1462606 RepID=A0A445FMA5_GLYSO
Glyma.09G205300	9543.41	1.06067	0.0601693	1.96148e-70	2.42612e-68	UniRef100_A0A0R0IB32 Uncharacterized protein n=3 Tax=Soja TaxID=1462606 RepID=A0A0R0IB32_SOYBN
Glyma.04G167500	200.782	1.05882	0.147709	1.27366e-13	1.98062e-12	UniRef100_K7KKM8 Thioredoxin domain-containing protein n=1 Tax=Glycine max TaxID=3847 RepID=K7KKM8_SOYBN
Glyma.08G333200	41.0803	1.05844	0.327991	0.000166214	0.000850547	UniRef100_I1KYP3 Protein kinase domain-containing protein n=1 Tax=Glycine max TaxID=3847 RepID=I1KYP3_SOYBN
Glyma.14G079600	162.012	1.05823	0.166293	3.13544e-11	4.02569e-10	UniRef100_I1M8I5 RPW8 domain-containing protein n=1 Tax=Glycine max TaxID=3847 RepID=I1M8I5_SOYBN
Glyma.13G248500	372.932	1.05822	0.122334	8.5786e-19	1.86086e-17	UniRef100_K7M1R3 Receptor-like serine/threonine-protein kinase n=4 Tax=Soja TaxID=1462606 RepID=K7M1R3_SOYBN
Glyma.01G161500	557.684	1.05809	0.0974772	3.1117e-28	1.09218e-26	UniRef100_C6SXE2 Rhodanese domain-containing protein n=2 Tax=Soja TaxID=1462606 RepID=C6SXE2_SOYBN
Glyma.17G257400	30.0734	1.05681	0.396595	0.000970394	0.0041833	UniRef100_K7MP14 Uncharacterized protein n=2 Tax=Soja TaxID=1462606 RepID=K7MP14_SOYBN
Glyma.14G089039	57.5878	1.05656	0.295777	5.09148e-05	0.000289361	UniRef100_A0A445H3H9 Uncharacterized protein n=2 Tax=Soja TaxID=1462606 RepID=A0A445H3H9_GLYSO
Glyma.06G221300	57.298	1.05656	0.325587	0.000154336	0.000795738	UniRef100_I1KDD3 Uncharacterized protein n=3 Tax=Soja TaxID=1462606 RepID=I1KDD3_SOYBN
Glyma.08G063233	222.276	1.05647	0.41988	0.00136607	0.00566389	UniRef100_A0A445JAQ7 Branched-chain-amino-acid aminotransferase 2, chloroplastic isoform A n=2 Tax=Glycine soja TaxID=3848 RepID=A0A445JAQ7_GLYSO
Glyma.18G231400	1214.89	1.05632	0.0810783	1.3907e-39	7.62185e-38	UniRef100_A0A445FXK8 Seed trypsin/chymotrypsin inhibitor TI5-72 n=3 Tax=Soja TaxID=1462606 RepID=A0A445FXK8_GLYSO
Glyma.09G229300	35.7383	1.05603	0.348249	0.000323912	0.00155718	UniRef100_K7LFJ0 Protein PROPEP890 n=3 Tax=Soja TaxID=1462606 RepID=PP890_SOYBN
Glyma.15G005800	243.266	1.05594	0.149928	3.00646e-13	4.52813e-12	UniRef100_I1MCD4 Uncharacterized protein n=1 Tax=Glycine max TaxID=3847 RepID=I1MCD4_SOYBN
Glyma.07G213600	78.3575	1.05363	0.240894	1.82527e-06	1.33178e-05	UniRef100_A0A445JZQ3 Uncharacterized protein n=2 Tax=Soja TaxID=1462606 RepID=A0A445JZQ3_GLYSO
Glyma.07G027400	94.4369	1.05351	0.217945	2.06903e-07	1.73784e-06	UniRef100_C6T9Q9 BHLH domain-containing protein n=2 Tax=Soja TaxID=1462606 RepID=C6T9Q9_SOYBN
Glyma.01G084200	411.489	1.05303	0.124054	3.45234e-18	7.21992e-17	UniRef100_A0A0R0LE00 Uncharacterized protein n=4 Tax=Soja TaxID=1462606 RepID=A0A0R0LE00_SOYBN
Glyma.02G232100	1745.29	1.05084	0.0731983	1.68183e-47	1.13115e-45	UniRef100_A0A445LT12 Exocyst subunit Exo70 family protein n=2 Tax=Glycine soja TaxID=3848 RepID=A0A445LT12_GLYSO
Glyma.01G221300	27.8232	1.05041	0.407769	0.00128401	0.00536246	UniRef100_I1JA86 RING-type domain-containing protein n=2 Tax=Soja TaxID=1462606 RepID=I1JA86_SOYBN
Glyma.19G198100	474.12	1.04971	0.10883	7.96674e-23	2.16179e-21	UniRef100_I1NAS9 Uncharacterized protein n=1 Tax=Glycine max TaxID=3847 RepID=I1NAS9_SOYBN
Glyma.14G210700	2109.75	1.04919	0.0699571	1.3127e-51	9.7153e-50	UniRef100_I1MBR7 UTP--glucose-1-phosphate uridylyltransferase n=1 Tax=Glycine max TaxID=3847 RepID=I1MBR7_SOYBN
Glyma.04G247600	1083.17	1.04891	0.0839626	1.47163e-36	7.38208e-35	UniRef100_I1JZ39 M20_dimer domain-containing protein n=2 Tax=Soja TaxID=1462606 RepID=I1JZ39_SOYBN
Glyma.08G136300	70.8846	1.0487	0.247284	3.39157e-06	2.3836e-05	UniRef100_K7L6I2 DUF4057 domain-containing protein n=1 Tax=Glycine max TaxID=3847 RepID=K7L6I2_SOYBN
Glyma.06G027000	122.545	1.04869	0.194044	1.06028e-08	1.0406e-07	UniRef100_A0A0R4J3G1 Uncharacterized protein n=2 Tax=Soja TaxID=1462606 RepID=A0A0R4J3G1_SOYBN
Glyma.13G283000	100.318	1.04771	0.207921	7.24417e-08	6.45063e-07	UniRef100_A0A0R0GV60 Uncharacterized protein (Fragment) n=1 Tax=Glycine max TaxID=3847 RepID=A0A0R0GV60_SOYBN
Glyma.12G007400	185.654	1.04733	0.174326	3.02406e-10	3.51529e-09	UniRef100_K7LSB9 Protein PROPEP914 n=3 Tax=Soja TaxID=1462606 RepID=PP914_SOYBN
Glyma.07G200900	25.9409	1.04696	0.42471	0.00163092	0.00661991	UniRef100_K7L2S5 Uncharacterized protein n=3 Tax=Soja TaxID=1462606 RepID=K7L2S5_SOYBN
Glyma.06G077200	5886.49	1.0453	0.0734332	9.29439e-47	6.08126e-45	UniRef100_I1K947 Uncharacterized protein n=3 Tax=Soja TaxID=1462606 RepID=I1K947_SOYBN
Glyma.09G204500	5246.86	1.0451	0.0687978	6.91543e-53	5.2589e-51	UniRef100_K7LF24 BHLH domain-containing protein n=2 Tax=Soja TaxID=1462606 RepID=K7LF24_SOYBN
Glyma.11G129600	758.241	1.04466	0.0909267	2.36065e-31	9.65566e-30	UniRef100_A0A445I0X1 Beta-glucosidase 24 isoform B n=2 Tax=Soja TaxID=1462606 RepID=A0A445I0X1_GLYSO
Glyma.07G020700	25.3724	1.04449	0.4111	0.00141213	0.00583946	UniRef100_A0A0B2P9A5 F-box/kelch-repeat protein n=2 Tax=Soja TaxID=1462606 RepID=A0A0B2P9A5_GLYSO
Glyma.01G202500	2842.12	1.04429	0.0794252	2.97856e-40	1.65758e-38	UniRef100_I1J9N4 Uncharacterized protein n=2 Tax=Soja TaxID=1462606 RepID=I1J9N4_SOYBN
Glyma.02G053100	59.0539	1.04426	0.285917	3.62577e-05	0.000212412	UniRef100_A0A0R0KXN8 BHLH domain-containing protein n=1 Tax=Glycine max TaxID=3847 RepID=A0A0R0KXN8_SOYBN
Glyma.15G268400	412.353	1.04354	0.110052	4.14554e-22	1.07793e-20	UniRef100_A0A0R0G6E6 Elp3 domain-containing protein n=2 Tax=Glycine max TaxID=3847 RepID=A0A0R0G6E6_SOYBN
Glyma.17G121900	562.207	1.04259	0.0970204	1.02233e-27	3.49325e-26	UniRef100_I1MUG9 Uncharacterized protein n=2 Tax=Soja TaxID=1462606 RepID=I1MUG9_SOYBN
Glyma.20G222600	2020.59	1.04125	0.0726785	2.52927e-47	1.68542e-45	UniRef100_Q8H1P3 Phosphoenolpyruvate-carboxylase kinase n=1 Tax=Glycine max TaxID=3847 RepID=Q8H1P3_SOYBN
Glyma.08G285800	170.415	1.04008	0.16632	6.6348e-11	8.24602e-10	UniRef100_A0A445JLA1 Uncharacterized protein n=4 Tax=Soja TaxID=1462606 RepID=A0A445JLA1_GLYSO
Glyma.05G165400	174.493	1.04003	0.165315	5.40621e-11	6.78915e-10	UniRef100_I1K466 Usp domain-containing protein n=2 Tax=Soja TaxID=1462606 RepID=I1K466_SOYBN
Glyma.09G222800	254.07	1.0399	0.134549	1.73344e-15	3.10394e-14	UniRef100_F8WRI5 Chloroplast gamma tocopherol methyltransferase 3 n=1 Tax=Glycine max TaxID=3847 RepID=F8WRI5_SOYBN
Glyma.01G027500	919.839	1.03915	0.0833994	2.16159e-36	1.07239e-34	UniRef100_A0A445LXZ9 Lipase isoform A n=1 Tax=Glycine soja TaxID=3848 RepID=A0A445LXZ9_GLYSO
Glyma.15G145400	981.325	1.03907	0.0806427	8.86267e-39	4.74915e-37	UniRef100_A0A445GTL8 Protein DEHYDRATION-INDUCED 19-like 7 isoform A n=2 Tax=Soja TaxID=1462606 RepID=A0A445GTL8_GLYSO
Glyma.18G121900	314.815	1.03905	0.135035	2.41881e-15	4.27816e-14	UniRef100_A0A0R0EZD3 Uncharacterized protein n=1 Tax=Glycine max TaxID=3847 RepID=A0A0R0EZD3_SOYBN
Glyma.01G039800	591.146	1.03898	0.10839	1.5055e-22	4.02772e-21	UniRef100_A0A445LYM6 Hydroxyproline O-galactosyltransferase GALT6 n=1 Tax=Glycine soja TaxID=3848 RepID=A0A445LYM6_GLYSO
Glyma.12G207200	58.2345	1.03879	0.28939	4.74747e-05	0.000271648	UniRef100_K7LW49 C2H2-type domain-containing protein n=1 Tax=Glycine max TaxID=3847 RepID=K7LW49_SOYBN
Glyma.18G013800	320.097	1.03788	0.122832	4.99182e-18	1.03318e-16	UniRef100_A0A0B2SI95 E3 ubiquitin-protein ligase RNF181 n=2 Tax=Soja TaxID=1462606 RepID=A0A0B2SI95_GLYSO
Glyma.06G117800	68.9522	1.03728	0.268396	1.63264e-05	0.000101718	UniRef100_A0A445K8B2 Glutathione S-transferase TCHQD isoform A n=2 Tax=Soja TaxID=1462606 RepID=A0A445K8B2_GLYSO
Glyma.07G036500	486.967	1.03674	0.104456	5.38581e-24	1.55243e-22	UniRef100_A0A445JRS0 Protein Brevis radix-like 2 isoform A n=3 Tax=Soja TaxID=1462606 RepID=A0A445JRS0_GLYSO
Glyma.09G161500	129.243	1.0365	0.191726	1.09132e-08	1.0699e-07	UniRef100_K7LE89 Uncharacterized protein n=1 Tax=Glycine max TaxID=3847 RepID=K7LE89_SOYBN
Glyma.02G137400	987.828	1.03631	0.0827687	9.40356e-37	4.7567e-35	UniRef100_C6T509 BHLH transcription factor n=3 Tax=Soja TaxID=1462606 RepID=C6T509_SOYBN
Glyma.18G284400	182.931	1.03587	0.163176	3.64401e-11	4.65219e-10	UniRef100_I1N506 Uncharacterized protein n=1 Tax=Glycine max TaxID=3847 RepID=I1N506_SOYBN
Glyma.06G065700	49.488	1.03437	0.291872	5.71052e-05	0.000321407	UniRef100_A0A0R0JI37 Uncharacterized protein n=2 Tax=Soja TaxID=1462606 RepID=A0A0R0JI37_SOYBN
Glyma.02G033500	827.365	1.03376	0.0940071	6.71022e-29	2.41628e-27	UniRef100_I1JC14 Glyco_transf_20 domain-containing protein n=3 Tax=Soja TaxID=1462606 RepID=I1JC14_SOYBN
Glyma.10G174700	62.2963	1.03362	0.276073	2.76403e-05	0.000165718	UniRef100_A0A445INX7 Testis-expressed protein 2 isoform A n=4 Tax=Soja TaxID=1462606 RepID=A0A445INX7_GLYSO
Glyma.11G076400	1088.64	1.03294	0.0895004	1.37789e-31	5.68745e-30	UniRef100_A0A0R0HN21 Uncharacterized protein n=2 Tax=Soja TaxID=1462606 RepID=A0A0R0HN21_SOYBN
Glyma.02G033600	2754	1.03272	0.0633073	1.34266e-60	1.27949e-58	UniRef100_A0A445LJ39 Potassium transporter n=3 Tax=Soja TaxID=1462606 RepID=A0A445LJ39_GLYSO
Glyma.15G019400	154.359	1.03261	0.166553	9.60732e-11	1.17503e-09	UniRef100_Q0PJL8 MYB transcription factor MYB52 n=1 Tax=Glycine max TaxID=3847 RepID=Q0PJL8_SOYBN
Glyma.05G190100	87.8383	1.03253	0.216384	2.95499e-07	2.41746e-06	UniRef100_I1K4X5 Uncharacterized protein n=1 Tax=Glycine max TaxID=3847 RepID=I1K4X5_SOYBN
Glyma.08G058800	92.554	1.03101	0.265474	1.51125e-05	9.48093e-05	UniRef100_I1KQQ0 Flavokinase domain-containing protein n=1 Tax=Glycine max TaxID=3847 RepID=I1KQQ0_SOYBN
Glyma.03G202600	2417.42	1.03092	0.0814542	1.806e-37	9.31821e-36	UniRef100_A0A0B2RF41 RING-type E3 ubiquitin transferase n=2 Tax=Soja TaxID=1462606 RepID=A0A0B2RF41_GLYSO
Glyma.13G099700	729.034	1.03043	0.0914618	3.41647e-30	1.31269e-28	UniRef100_I1LVM9 Uncharacterized protein n=1 Tax=Glycine max TaxID=3847 RepID=I1LVM9_SOYBN
Glyma.18G221400	25.1745	1.03027	0.412149	0.00161397	0.00655849	UniRef100_K7MU01 SEC7 domain-containing protein n=1 Tax=Glycine max TaxID=3847 RepID=K7MU01_SOYBN
Glyma.02G242400	98.0998	1.02946	0.21119	1.74788e-07	1.48537e-06	UniRef100_I1JHU2 C2H2-type domain-containing protein n=1 Tax=Glycine max TaxID=3847 RepID=I1JHU2_SOYBN
Glyma.10G289200	79.3353	1.02924	0.230255	1.20298e-06	9.01906e-06	UniRef100_K7LM20 CASP-like protein n=1 Tax=Glycine max TaxID=3847 RepID=K7LM20_SOYBN
Glyma.09G122600	59.3271	1.02911	0.293259	6.84278e-05	0.000378238	UniRef100_A0A0B2R713 Metal tolerance protein 10 n=2 Tax=Soja TaxID=1462606 RepID=A0A0B2R713_GLYSO
Glyma.11G129700	4723.78	1.02887	0.0716633	1.59771e-47	1.07859e-45	UniRef100_A0A0B2RNP1 Beta-glucosidase 24 n=2 Tax=Soja TaxID=1462606 RepID=A0A0B2RNP1_GLYSO
Glyma.02G146300	77.0026	1.02837	0.230487	1.30484e-06	9.71686e-06	UniRef100_I1JF94 Uncharacterized protein n=2 Tax=Soja TaxID=1462606 RepID=I1JF94_SOYBN
Glyma.07G192200	27.5943	1.02803	0.398439	0.00128478	0.00536508	UniRef100_I1KLF6 Protein kinase domain-containing protein n=2 Tax=Soja TaxID=1462606 RepID=I1KLF6_SOYBN
Glyma.02G251800	75.6003	1.02798	0.239025	2.74636e-06	1.95179e-05	UniRef100_K7KAN7 LIM zinc-binding domain-containing protein n=2 Tax=Soja TaxID=1462606 RepID=K7KAN7_SOYBN
Glyma.12G183900	94.2886	1.02685	0.211578	1.92289e-07	1.62492e-06	UniRef100_I1LTU8 C2H2-type domain-containing protein n=2 Tax=Soja TaxID=1462606 RepID=I1LTU8_SOYBN
Glyma.19G254700	31.4608	1.02649	0.388069	0.00109092	0.00464247	UniRef100_UPI0003DEA81F putative anthocyanidin reductase isoform X4 n=1 Tax=Glycine max TaxID=3847 RepID=UPI0003DEA81F
Glyma.01G022500	31.0846	1.02581	0.365214	0.000677751	0.00303966	UniRef100_I1J503 Uncharacterized protein n=2 Tax=Soja TaxID=1462606 RepID=I1J503_SOYBN
Glyma.10G006850	1419.75	1.02577	0.0899421	7.04441e-31	2.82378e-29	UniRef100_A0A445IG14 Uncharacterized protein n=2 Tax=Soja TaxID=1462606 RepID=A0A445IG14_GLYSO
Glyma.08G366900	353.454	1.02462	0.139804	4.14806e-14	6.64664e-13	UniRef100_I1KZM6 C2H2-type domain-containing protein n=1 Tax=Glycine max TaxID=3847 RepID=I1KZM6_SOYBN
Glyma.19G009100	750.07	1.02436	0.0897424	5.95446e-31	2.38952e-29	UniRef100_I1N5S0 Formate dehydrogenase, mitochondrial n=2 Tax=Soja TaxID=1462606 RepID=I1N5S0_SOYBN
Glyma.06G321600	126.839	1.02432	0.189502	1.10564e-08	1.08335e-07	UniRef100_I1KFV5 FAD-binding PCMH-type domain-containing protein n=3 Tax=Soja TaxID=1462606 RepID=I1KFV5_SOYBN
Glyma.01G172700	25.3098	1.02431	0.432903	0.00226615	0.00885496	UniRef100_I1J8T1 NmrA domain-containing protein n=2 Tax=Soja TaxID=1462606 RepID=I1J8T1_SOYBN
Glyma.10G293100	405.751	1.02421	0.109299	1.20812e-21	3.07062e-20	UniRef100_A0A0R0IB33 Uncharacterized protein n=1 Tax=Glycine max TaxID=3847 RepID=A0A0R0IB33_SOYBN
Glyma.10G153900	180.847	1.0238	0.162981	5.46192e-11	6.85197e-10	UniRef100_I1LBB9 Lipoxygenase n=2 Tax=Soja TaxID=1462606 RepID=I1LBB9_SOYBN
Glyma.19G196400	665.284	1.02327	0.0995057	1.43486e-25	4.43311e-24	UniRef100_I1NAR1 Uncharacterized protein n=2 Tax=Soja TaxID=1462606 RepID=I1NAR1_SOYBN
Glyma.11G228000	342.542	1.02238	0.120849	4.80068e-18	9.95327e-17	UniRef100_C6TEZ8 Uncharacterized protein n=3 Tax=Soja TaxID=1462606 RepID=C6TEZ8_SOYBN
Glyma.13G109700	1635.04	1.02181	0.08128	5.65175e-37	2.87904e-35	UniRef100_A0A0B2PK07 12-oxophytodienoate reductase 3 n=2 Tax=Soja TaxID=1462606 RepID=A0A0B2PK07_GLYSO
Glyma.06G101400	359.771	1.02175	0.124956	4.96184e-17	9.65555e-16	UniRef100_I1K9V6 VQ domain-containing protein n=1 Tax=Glycine max TaxID=3847 RepID=I1K9V6_SOYBN
Glyma.12G150500	867.288	1.02079	0.0901762	1.85793e-30	7.22313e-29	UniRef100_A0A0B2QUW9 Stem-specific protein TSJT1 n=2 Tax=Soja TaxID=1462606 RepID=A0A0B2QUW9_GLYSO
Glyma.07G246700	34.6801	1.0204	0.383698	0.00105092	0.00449236	UniRef100_I1KMX8 Uncharacterized protein n=1 Tax=Glycine max TaxID=3847 RepID=I1KMX8_SOYBN
Glyma.11G183700	287.052	1.02026	0.124438	4.25831e-17	8.34041e-16	UniRef100_K7LQ64 Uncharacterized protein n=2 Tax=Glycine max TaxID=3847 RepID=K7LQ64_SOYBN
Glyma.17G047900	44.1073	1.01995	0.332377	0.000303807	0.00147007	UniRef100_I1MS93 Protein kinase domain-containing protein n=4 Tax=Soja TaxID=1462606 RepID=I1MS93_SOYBN
Glyma.06G118700	56.7457	1.0199	0.286909	5.73957e-05	0.00032279	UniRef100_A0A445K8D7 Abscisic acid receptor PYL4 n=2 Tax=Soja TaxID=1462606 RepID=A0A445K8D7_GLYSO
Glyma.10G006900	1432.13	1.01952	0.0901984	2.27647e-30	8.8218e-29	UniRef100_A0A0R0HML1 Uncharacterized protein n=1 Tax=Glycine max TaxID=3847 RepID=A0A0R0HML1_SOYBN
Glyma.14G158600	134.555	1.01946	0.20918	1.77172e-07	1.50492e-06	UniRef100_A0A0B2Q696 Wall-associated receptor kinase 5 n=2 Tax=Soja TaxID=1462606 RepID=A0A0B2Q696_GLYSO
Glyma.19G092900	43.7682	1.01935	0.348185	0.000479189	0.00222768	UniRef100_A0A0B2QKY4 Uncharacterized protein n=3 Tax=Phaseoleae TaxID=163735 RepID=A0A0B2QKY4_GLYSO
Glyma.03G212400	196.706	1.01883	0.151475	2.98335e-12	4.17958e-11	UniRef100_A0A0R0KXR5 HMA domain-containing protein n=2 Tax=Glycine max TaxID=3847 RepID=A0A0R0KXR5_SOYBN
Glyma.07G267400	34.1147	1.0187	0.354649	0.000577958	0.00264129	UniRef100_A0A0B2SDD1 Microtubule-associated protein 70-5 n=1 Tax=Glycine soja TaxID=3848 RepID=A0A0B2SDD1_GLYSO
Glyma.20G110900	2348.53	1.01865	0.0699272	7.70734e-49	5.37386e-47	UniRef100_C6T0C4 Uncharacterized protein n=1 Tax=Glycine max TaxID=3847 RepID=C6T0C4_SOYBN
Glyma.08G131925	166219	1.0182	0.139523	4.45714e-14	7.12926e-13	UniRef100_A0A151T1A1 Repetitive proline-rich cell wall protein 2 n=1 Tax=Cajanus cajan TaxID=3821 RepID=A0A151T1A1_CAJCA
Glyma.06G162700	133.648	1.01809	0.183045	4.556e-09	4.67336e-08	UniRef100_K7KVE5 Uncharacterized protein n=3 Tax=Soja TaxID=1462606 RepID=K7KVE5_SOYBN
Glyma.10G255000	325.375	1.01795	0.131195	1.46866e-15	2.63899e-14	UniRef100_A7X680 Inositol-tetrakisphosphate 1-kinase n=1 Tax=Glycine max TaxID=3847 RepID=A7X680_SOYBN
Glyma.03G231100	30.8929	1.01739	0.381682	0.00102026	0.00437217	UniRef100_A0A445LFY4 Homeobox protein knotted-1-like 1 isoform A n=3 Tax=Soja TaxID=1462606 RepID=A0A445LFY4_GLYSO
Glyma.02G240302	45.779	1.01611	0.345118	0.000446063	0.00208847	UniRef100_A0A0R0L7N3 SET domain-containing protein (Fragment) n=2 Tax=Soja TaxID=1462606 RepID=A0A0R0L7N3_SOYBN
Glyma.09G073050	26.0448	1.0159	0.43391	0.00241565	0.00934911	UniRef100_A0A445IYE4 Uncharacterized protein n=2 Tax=Soja TaxID=1462606 RepID=A0A445IYE4_GLYSO
Glyma.18G290400	161.058	1.01589	0.187326	1.02641e-08	1.00845e-07	UniRef100_I1N566 Uncharacterized protein n=2 Tax=Soja TaxID=1462606 RepID=I1N566_SOYBN
Glyma.13G363500	102.59	1.01546	0.19953	5.9034e-08	5.32102e-07	UniRef100_I1M5S0 Lipoyl-binding domain-containing protein n=1 Tax=Glycine max TaxID=3847 RepID=I1M5S0_SOYBN
Glyma.12G146700	247.537	1.01474	0.162369	6.60922e-11	8.21705e-10	UniRef100_A0A0R0HEZ8 Diacylglycerol kinase n=3 Tax=Soja TaxID=1462606 RepID=A0A0R0HEZ8_SOYBN
Glyma.12G084600	495.588	1.01385	0.109445	3.66976e-21	9.08436e-20	UniRef100_I1LRC1 Uncharacterized protein n=2 Tax=Soja TaxID=1462606 RepID=I1LRC1_SOYBN
Glyma.09G182200	72.786	1.01337	0.271606	3.03206e-05	0.000180054	UniRef100_K7LEN5 Protein kinase domain-containing protein n=1 Tax=Glycine max TaxID=3847 RepID=K7LEN5_SOYBN
Glyma.01G119500	640.923	1.0122	0.0908059	1.31561e-29	4.89351e-28	UniRef100_K7K3C2 A_deaminase domain-containing protein n=1 Tax=Glycine max TaxID=3847 RepID=K7K3C2_SOYBN
Glyma.01G240800	49.752	1.01179	0.291907	8.1157e-05	0.000441571	UniRef100_K7K5K9 Uncharacterized protein n=3 Tax=Soja TaxID=1462606 RepID=K7K5K9_SOYBN
Glyma.15G131500	51.3905	1.01162	0.287507	6.6792e-05	0.000369989	UniRef100_K7MB46 Helicase ATP-binding domain-containing protein n=2 Tax=Soja TaxID=1462606 RepID=K7MB46_SOYBN
Glyma.10G184500	91.1821	1.01015	0.220735	7.9339e-07	6.1307e-06	UniRef100_A0A445IPC8 Transcriptional regulator TAC1 n=1 Tax=Glycine soja TaxID=3848 RepID=A0A445IPC8_GLYSO
Glyma.14G206800	60.0596	1.00894	0.302554	0.000124667	0.000655018	UniRef100_I1MBM6 KH domain-containing protein n=2 Tax=Soja TaxID=1462606 RepID=I1MBM6_SOYBN
Glyma.02G109100	865.845	1.00769	0.0842952	1.07225e-33	4.75756e-32	UniRef100_A0A0B2PWS4 Expansin n=2 Tax=Soja TaxID=1462606 RepID=A0A0B2PWS4_GLYSO
Glyma.17G060500	87.0137	1.00767	0.223469	1.04516e-06	7.92522e-06	UniRef100_A0A0R0F908 Uncharacterized protein n=1 Tax=Glycine max TaxID=3847 RepID=A0A0R0F908_SOYBN
Glyma.05G063000	194.64	1.00737	0.154769	1.28777e-11	1.70618e-10	UniRef100_A0A445KKG5 DeSI-like protein isoform A n=4 Tax=Soja TaxID=1462606 RepID=A0A445KKG5_GLYSO
Glyma.08G065300	74.3559	1.00572	0.235568	3.16231e-06	2.23465e-05	UniRef100_A0A0R0ISX6 Uncharacterized protein n=3 Tax=Soja TaxID=1462606 RepID=A0A0R0ISX6_SOYBN
Glyma.05G108200	1284.72	1.00409	0.0975279	1.27251e-25	3.94499e-24	UniRef100_I1K2G2 BZIP domain-containing protein n=2 Tax=Soja TaxID=1462606 RepID=I1K2G2_SOYBN
Glyma.02G068900	29.3713	1.00399	0.386549	0.00127783	0.00534344	UniRef100_A0A0R0KYU7 Xyloglucan endotransglucosylase/hydrolase n=3 Tax=Soja TaxID=1462606 RepID=A0A0R0KYU7_SOYBN
Glyma.13G245600	52.1343	1.00382	0.299681	0.000124485	0.00065425	UniRef100_K7M1P6 DUF4408 domain-containing protein n=2 Tax=Soja TaxID=1462606 RepID=K7M1P6_SOYBN
Glyma.02G151900	124.178	1.00322	0.214014	4.5755e-07	3.64717e-06	UniRef100_A0A0B2SIQ0 Uncharacterized protein n=3 Tax=Soja TaxID=1462606 RepID=A0A0B2SIQ0_GLYSO
Glyma.13G129400	25.1231	1.00288	0.423714	0.00229186	0.00893805	UniRef100_C6T2Z2 Uncharacterized protein n=1 Tax=Glycine max TaxID=3847 RepID=C6T2Z2_SOYBN
Glyma.05G157000	8051.07	1.00133	0.0743046	3.89614e-42	2.24787e-40	UniRef100_Q0GPG2 BZIP transcription factor n=1 Tax=Glycine max TaxID=3847 RepID=Q0GPG2_SOYBN
Glyma.11G026300	1044.12	1.00087	0.0971935	1.28731e-25	3.98745e-24	UniRef100_K7LMQ6 Protein DETOXIFICATION n=2 Tax=Soja TaxID=1462606 RepID=K7LMQ6_SOYBN
Glyma.04G036700	781.887	1.00078	0.0980182	3.06776e-25	9.35008e-24	UniRef100_I1JTH1 MYB/HD-like transcription factor n=2 Tax=Soja TaxID=1462606 RepID=I1JTH1_SOYBN
Glyma.11G168428	70.9024	1.00005	0.239799	4.96296e-06	3.38714e-05	UniRef100_UPI00018768E4 cytochrome P450 83B1 n=1 Tax=Glycine max TaxID=3847 RepID=UPI00018768E4
Glyma.10G033500	53.8784	-1.00061	0.305655	0.000160453	0.000823986	UniRef100_A0A0R0HNT6 Zeta_toxin domain-containing protein n=3 Tax=Glycine max TaxID=3847 RepID=A0A0R0HNT6_SOYBN
Glyma.06G235900	107.555	-1.00063	0.196568	6.1897e-08	5.56518e-07	UniRef100_I1KDQ7 Aminotran_1_2 domain-containing protein n=2 Tax=Soja TaxID=1462606 RepID=I1KDQ7_SOYBN
Glyma.06G259100	239.709	-1.0014	0.148927	3.12763e-12	4.37323e-11	UniRef100_I1KE91 TIR domain-containing protein n=1 Tax=Glycine max TaxID=3847 RepID=I1KE91_SOYBN
Glyma.03G179900	107.204	-1.00165	0.199198	8.51356e-08	7.51244e-07	UniRef100_A0A0R0KS92 FAS1 domain-containing protein n=1 Tax=Glycine max TaxID=3847 RepID=A0A0R0KS92_SOYBN
Glyma.16G056300	117.032	-1.00168	0.190204	2.38842e-08	2.25347e-07	UniRef100_A0A0R4J5J3 Uncharacterized protein n=1 Tax=Glycine max TaxID=3847 RepID=A0A0R4J5J3_SOYBN
Glyma.10G060100	8764.73	-1.00172	0.0579319	1.01935e-67	1.19145e-65	UniRef100_Q8S4Q4 Nodulin 6l n=2 Tax=Glycine max TaxID=3847 RepID=Q8S4Q4_SOYBN
Glyma.11G044200	94.8957	-1.00247	0.213781	4.66312e-07	3.7121e-06	UniRef100_A0A0B2PZP0 Tubulin alpha chain n=4 Tax=Soja TaxID=1462606 RepID=A0A0B2PZP0_GLYSO
Glyma.13G217500	61.098	-1.0026	0.257913	1.64456e-05	0.000102373	UniRef100_A0A445I833 Phospho-N-acetylmuramoyl-pentapeptide-transferase-like n=2 Tax=Glycine soja TaxID=3848 RepID=A0A445I833_GLYSO
Glyma.08G217000	38.0463	-1.00327	0.354726	0.000671102	0.00301395	UniRef100_I1KVJ8 Uncharacterized protein n=1 Tax=Glycine max TaxID=3847 RepID=I1KVJ8_SOYBN
Glyma.13G283600	822.11	-1.00436	0.0996884	1.25495e-24	3.72127e-23	UniRef100_C6SZ72 EF-hand domain-containing protein n=1 Tax=Glycine max TaxID=3847 RepID=C6SZ72_SOYBN
Glyma.04G150500	71.7	-1.00458	0.256994	1.48586e-05	9.3314e-05	UniRef100_I1JW83 GRAS domain-containing protein n=2 Tax=Soja TaxID=1462606 RepID=I1JW83_SOYBN
Glyma.13G221000	40.2624	-1.005	0.344313	0.000513534	0.00237208	UniRef100_K7M148 Galectin domain-containing protein n=2 Tax=Soja TaxID=1462606 RepID=K7M148_SOYBN
Glyma.20G116500	50.1094	-1.00526	0.323234	0.000274974	0.00134278	UniRef100_K7N2W8 Uncharacterized protein n=1 Tax=Glycine max TaxID=3847 RepID=K7N2W8_SOYBN
Glyma.02G169800	371.388	-1.00541	0.129926	1.82591e-15	3.26145e-14	UniRef100_I1JFU5 Dirigent protein n=1 Tax=Glycine max TaxID=3847 RepID=I1JFU5_SOYBN
Glyma.03G074600	114.602	-1.00563	0.197301	5.78903e-08	5.22315e-07	UniRef100_A0A0R0KML5 Uncharacterized protein n=2 Tax=Glycine max TaxID=3847 RepID=A0A0R0KML5_SOYBN
Glyma.17G068400	268.189	-1.00648	0.130166	1.93032e-15	3.43943e-14	UniRef100_I1MSW5 Uncharacterized protein n=1 Tax=Glycine max TaxID=3847 RepID=I1MSW5_SOYBN
Glyma.13G315800	306.314	-1.00692	0.120101	9.21419e-18	1.87381e-16	UniRef100_I1M4B9 CN hydrolase domain-containing protein n=1 Tax=Glycine max TaxID=3847 RepID=I1M4B9_SOYBN
Glyma.08G282900	45.8428	-1.00693	0.30985	0.000173927	0.00088587	UniRef100_A0A0B2PVR6 Cyclin-dependent protein kinase inhibitor SMR6 n=2 Tax=Soja TaxID=1462606 RepID=A0A0B2PVR6_GLYSO
Glyma.04G231400	27.2099	-1.00715	0.420159	0.00216349	0.00851091	UniRef100_A0A0B2QD54 Homeobox-leucine zipper protein ATHB-7 n=3 Tax=Soja TaxID=1462606 RepID=A0A0B2QD54_GLYSO
Glyma.01G050100	219.947	-1.0072	0.143115	3.50389e-13	5.25565e-12	UniRef100_A0A445LZ49 Expansin n=3 Tax=Soja TaxID=1462606 RepID=A0A445LZ49_GLYSO
Glyma.06G308300	81.5408	-1.00776	0.225855	1.33399e-06	9.91763e-06	UniRef100_K7KYC9 Uncharacterized protein n=2 Tax=Soja TaxID=1462606 RepID=K7KYC9_SOYBN
Glyma.07G244600	837.883	-1.00787	0.0870251	9.27484e-32	3.85034e-30	UniRef100_I1KMW1 Uncharacterized protein n=2 Tax=Soja TaxID=1462606 RepID=I1KMW1_SOYBN
Glyma.03G077100	49.3472	-1.00806	0.303566	0.000134944	0.000704404	UniRef100_I1JLR8 Uncharacterized protein n=2 Tax=Soja TaxID=1462606 RepID=I1JLR8_SOYBN
Glyma.08G280600	51.0343	-1.00842	0.309648	0.000168934	0.000862875	UniRef100_I1KX92 Cyclin N-terminal domain-containing protein n=2 Tax=Soja TaxID=1462606 RepID=I1KX92_SOYBN
Glyma.16G144000	127.252	-1.0085	0.185639	9.69668e-09	9.55827e-08	UniRef100_I1MNK3 Protein kinase domain-containing protein n=2 Tax=Glycine max TaxID=3847 RepID=I1MNK3_SOYBN
Glyma.02G041900	699.12	-1.0094	0.103451	3.12607e-23	8.68494e-22	UniRef100_I1JCA9 Phosphoserine aminotransferase n=2 Tax=Soja TaxID=1462606 RepID=I1JCA9_SOYBN
Glyma.10G295400	384.68	-1.00986	0.113226	8.36749e-20	1.93476e-18	UniRef100_K7LM62 Pyruvate carboxyltransferase domain-containing protein n=1 Tax=Glycine max TaxID=3847 RepID=K7LM62_SOYBN
Glyma.04G196100	216.775	-1.01081	0.157398	2.39574e-11	3.0991e-10	UniRef100_U5JCC7 Acetolactate synthase n=1 Tax=Glycine max TaxID=3847 RepID=U5JCC7_SOYBN
Glyma.09G176600	30.9265	-1.01152	0.372773	0.000931677	0.00403053	UniRef100_A0A445J2C7 Putative pentatricopeptide repeat-containing protein, mitochondrial n=2 Tax=Glycine soja TaxID=3848 RepID=A0A445J2C7_GLYSO
Glyma.18G154700	49.505	-1.01264	0.286052	6.22856e-05	0.000347605	UniRef100_K7MSG1 Uncharacterized protein n=2 Tax=Glycine max TaxID=3847 RepID=K7MSG1_SOYBN
Glyma.08G017300	1336.06	-1.013	0.0711874	1.10137e-46	7.19317e-45	UniRef100_I1KPE4 Uncharacterized protein n=2 Tax=Soja TaxID=1462606 RepID=I1KPE4_SOYBN
Glyma.04G194600	200.998	-1.01456	0.154534	9.12341e-12	1.22677e-10	UniRef100_K7KL53 Myb-like domain-containing protein n=1 Tax=Glycine max TaxID=3847 RepID=K7KL53_SOYBN
Glyma.11G243400	65.6059	-1.01457	0.268096	2.35829e-05	0.000143512	UniRef100_I1LNG5 RING-type domain-containing protein n=1 Tax=Glycine max TaxID=3847 RepID=I1LNG5_SOYBN
Glyma.03G171500	90.614	-1.01493	0.240968	4.04054e-06	2.79993e-05	UniRef100_I1JPC8 Na_H_Exchanger domain-containing protein n=1 Tax=Glycine max TaxID=3847 RepID=I1JPC8_SOYBN
Glyma.14G207900	44.8614	-1.01498	0.309302	0.000155273	0.000799886	UniRef100_K7M8A9 Uncharacterized protein n=2 Tax=Soja TaxID=1462606 RepID=K7M8A9_SOYBN
Glyma.12G100600	191.906	-1.01503	0.156674	1.61063e-11	2.11608e-10	UniRef100_C6T1X2 HTH myb-type domain-containing protein n=2 Tax=Soja TaxID=1462606 RepID=C6T1X2_SOYBN
Glyma.16G200600	1165.86	-1.01533	0.0752175	2.85769e-42	1.65138e-40	UniRef100_A0A0R0G0T0 PfkB domain-containing protein n=2 Tax=Soja TaxID=1462606 RepID=A0A0R0G0T0_SOYBN
Glyma.09G035600	3105.29	-1.01551	0.0608037	2.30189e-63	2.35516e-61	UniRef100_A0A0B2PYN5 ATP-citrate synthase beta chain protein 1 n=2 Tax=Soja TaxID=1462606 RepID=A0A0B2PYN5_GLYSO
Glyma.05G136200	472.452	-1.01571	0.103346	1.54007e-23	4.32861e-22	UniRef100_I1K3A6 Uncharacterized protein n=3 Tax=Soja TaxID=1462606 RepID=I1K3A6_SOYBN
Glyma.03G082100	347.577	-1.01587	0.119249	2.80783e-18	5.89939e-17	UniRef100_A0A0B2NW43 Metallothionein-like protein 1 n=2 Tax=Soja TaxID=1462606 RepID=A0A0B2NW43_GLYSO
Glyma.08G118700	76.4714	-1.01702	0.23637	2.73494e-06	1.94444e-05	UniRef100_A0A0B5EA67 Tau class glutathione S-transferase n=2 Tax=Soja TaxID=1462606 RepID=A0A0B5EA67_SOYBN
Glyma.04G100300	362.59	-1.01784	0.11821	1.25813e-18	2.69906e-17	UniRef100_I1JVC7 Uncharacterized protein n=2 Tax=Soja TaxID=1462606 RepID=I1JVC7_SOYBN
Glyma.10G079900	1024.15	-1.01784	0.0944537	8.00241e-28	2.74998e-26	UniRef100_A0A0R0HYL4 LEA_2 domain-containing protein n=1 Tax=Glycine max TaxID=3847 RepID=A0A0R0HYL4_SOYBN
Glyma.11G061200	120.285	-1.01831	0.202903	8.38099e-08	7.39908e-07	UniRef100_I1LHJ7 Uncharacterized protein n=1 Tax=Glycine max TaxID=3847 RepID=I1LHJ7_SOYBN
Glyma.07G196600	157.985	-1.01872	0.18177	3.52041e-09	3.65574e-08	UniRef100_K7L2Q0 Uncharacterized protein n=1 Tax=Glycine max TaxID=3847 RepID=K7L2Q0_SOYBN
Glyma.10G267700	876.159	-1.0193	0.0970777	1.55633e-26	4.99785e-25	UniRef100_I1LEP8 Protein DETOXIFICATION n=1 Tax=Glycine max TaxID=3847 RepID=I1LEP8_SOYBN
Glyma.11G107800	32.9494	-1.01965	0.351993	0.000535367	0.0024659	UniRef100_A0A0R4J4H5 UBIQUITIN_CONJUGAT_2 domain-containing protein n=2 Tax=Soja TaxID=1462606 RepID=A0A0R4J4H5_SOYBN
Glyma.08G113900	73.9794	-1.01971	0.243005	4.3793e-06	3.01788e-05	UniRef100_I1KSB7 X8 domain-containing protein n=2 Tax=Soja TaxID=1462606 RepID=I1KSB7_SOYBN
Glyma.13G067900	1316.35	-1.02052	0.0814296	8.91847e-37	4.52399e-35	UniRef100_I1LWG0 Hexosyltransferase n=2 Tax=Soja TaxID=1462606 RepID=I1LWG0_SOYBN
Glyma.09G231800	550.706	-1.02146	0.109014	1.30082e-21	3.29697e-20	UniRef100_K7LFL5 Endoglucanase n=1 Tax=Glycine max TaxID=3847 RepID=K7LFL5_SOYBN
Glyma.16G050900	188.382	-1.02248	0.152432	3.36355e-12	4.69584e-11	UniRef100_I1MLC5 CONSTANS-like zinc finger protein n=2 Tax=Glycine max TaxID=3847 RepID=I1MLC5_SOYBN
Glyma.19G159600	92.366	-1.02307	0.226962	1.08289e-06	8.18898e-06	UniRef100_K7MYM4 C2H2-type domain-containing protein n=2 Tax=Soja TaxID=1462606 RepID=K7MYM4_SOYBN
Glyma.10G210051	383.696	-1.0249	0.122657	1.12821e-17	2.28279e-16	UniRef100_A0A445IQI8 E3 ubiquitin-protein ligase WAV3 isoform A n=2 Tax=Glycine soja TaxID=3848 RepID=A0A445IQI8_GLYSO
Glyma.05G129600	253.391	-1.02531	0.135004	5.40088e-15	9.29759e-14	UniRef100_Q9M507 Beta-ketoacyl-ACP synthetase I-2 n=1 Tax=Glycine max TaxID=3847 RepID=Q9M507_SOYBN
Glyma.18G060300	89.1917	-1.02534	0.224078	7.62627e-07	5.90561e-06	UniRef100_A0A0B2NY61 Zinc transporter 6, chloroplastic n=2 Tax=Soja TaxID=1462606 RepID=A0A0B2NY61_GLYSO
Glyma.17G251100	127.472	-1.02539	0.186219	6.18813e-09	6.23074e-08	UniRef100_A0A0R0FSD4 MFS domain-containing protein n=2 Tax=Soja TaxID=1462606 RepID=A0A0R0FSD4_SOYBN
Glyma.15G037600	69.5148	-1.0266	0.256394	9.74456e-06	6.34592e-05	UniRef100_I1MDE7 RHOMBOID-like protein n=2 Tax=Glycine max TaxID=3847 RepID=I1MDE7_SOYBN
Glyma.10G058200	3907.52	-1.02709	0.0730828	1.28394e-45	8.13546e-44	UniRef100_I1L905 Phenylalanine ammonia-lyase n=1 Tax=Glycine max TaxID=3847 RepID=I1L905_SOYBN
Glyma.08G226400	79.0635	-1.02851	0.236798	2.26215e-06	1.62624e-05	UniRef100_I1KVW4 MFS domain-containing protein n=1 Tax=Glycine max TaxID=3847 RepID=I1KVW4_SOYBN
Glyma.14G003700	32.6563	-1.0291	0.402024	0.00135323	0.00561521	UniRef100_A0A0B2SRL7 E3 ubiquitin-protein ligase ORTHRUS 2 n=2 Tax=Soja TaxID=1462606 RepID=A0A0B2SRL7_GLYSO
Glyma.12G181800	1764.27	-1.02914	0.0841868	4.11309e-35	1.92426e-33	UniRef100_I1LTS0 Arogenate dehydratase n=2 Tax=Soja TaxID=1462606 RepID=I1LTS0_SOYBN
Glyma.17G242100	125.19	-1.03029	0.1837	3.43539e-09	3.5695e-08	UniRef100_I1MXN9 Uncharacterized protein n=1 Tax=Glycine max TaxID=3847 RepID=I1MXN9_SOYBN
Glyma.01G239800	67.5462	-1.03128	0.273644	2.45264e-05	0.000148653	UniRef100_A0A0B2RF09 Protein FANTASTIC FOUR 3 n=2 Tax=Soja TaxID=1462606 RepID=A0A0B2RF09_GLYSO
Glyma.02G261600	45.6951	-1.03136	0.317191	0.000168578	0.0008613	UniRef100_I1JID2 Laccase n=2 Tax=Soja TaxID=1462606 RepID=I1JID2_SOYBN
Glyma.15G037100	121.829	-1.03186	0.200159	4.18081e-08	3.83342e-07	UniRef100_A0A445GNX1 Scarecrow-like protein 14 n=1 Tax=Glycine soja TaxID=3848 RepID=A0A445GNX1_GLYSO
Glyma.08G025700	2432.15	-1.03204	0.0763999	2.46804e-42	1.43079e-40	UniRef100_I1KPN3 Uncharacterized protein n=3 Tax=Soja TaxID=1462606 RepID=I1KPN3_SOYBN
Glyma.05G017000	147.565	-1.03218	0.17236	3.53545e-10	4.08869e-09	UniRef100_I1K168 Uncharacterized protein n=2 Tax=Soja TaxID=1462606 RepID=I1K168_SOYBN
Glyma.03G074300	89.6622	-1.03246	0.215991	2.85078e-07	2.33897e-06	UniRef100_A0A0B2R569 L-type lectin-domain containing receptor kinase VIII.2 n=2 Tax=Soja TaxID=1462606 RepID=A0A0B2R569_GLYSO
Glyma.14G208000	155.234	-1.03255	0.183368	2.91157e-09	3.04274e-08	UniRef100_A0A0R0GFN5 LEA_2 domain-containing protein n=2 Tax=Soja TaxID=1462606 RepID=A0A0R0GFN5_SOYBN
Glyma.12G011400	87.3042	-1.03301	0.221928	5.23483e-07	4.13621e-06	UniRef100_K7LSE0 FAD-binding PCMH-type domain-containing protein n=2 Tax=Glycine max TaxID=3847 RepID=K7LSE0_SOYBN
Glyma.11G132200	467.465	-1.0339	0.102567	1.17012e-24	3.47256e-23	UniRef100_I1LJV1 Uncharacterized protein n=2 Tax=Soja TaxID=1462606 RepID=I1LJV1_SOYBN
Glyma.11G235000	621.494	-1.03393	0.0972541	3.79317e-27	1.26382e-25	UniRef100_A0A445HHW3 HIG1 domain-containing protein n=3 Tax=Soja TaxID=1462606 RepID=A0A445HHW3_GLYSO
Glyma.02G075300	606.08	-1.03425	0.103422	2.69436e-24	7.87316e-23	UniRef100_A0A445LKT1 Protein DETOXIFICATION n=3 Tax=Soja TaxID=1462606 RepID=A0A445LKT1_GLYSO
Glyma.15G112300	120.042	-1.03507	0.213167	1.92469e-07	1.62574e-06	UniRef100_I1MFL2 Pyrophosphate--fructose 6-phosphate 1-phosphotransferase subunit beta n=2 Tax=Soja TaxID=1462606 RepID=I1MFL2_SOYBN
Glyma.06G088600	1641.09	-1.03572	0.0979139	8.90979e-27	2.89905e-25	UniRef100_I1K9I0 ATP-dependent 6-phosphofructokinase n=2 Tax=Soja TaxID=1462606 RepID=I1K9I0_SOYBN
Glyma.20G145200	430.123	-1.03668	0.127873	8.80768e-17	1.70111e-15	UniRef100_K7N3G7 Amine oxidase n=5 Tax=Soja TaxID=1462606 RepID=K7N3G7_SOYBN
Glyma.17G218500	1421.87	-1.0386	0.0754763	7.91093e-44	4.82633e-42	UniRef100_I1MX00 Protein kinase domain-containing protein n=2 Tax=Soja TaxID=1462606 RepID=I1MX00_SOYBN
Glyma.15G140200	857.143	-1.03962	0.0837768	4.00912e-36	1.96736e-34	UniRef100_A0A0R0G0M9 Ligase_CoA domain-containing protein n=4 Tax=Soja TaxID=1462606 RepID=A0A0R0G0M9_SOYBN
Glyma.03G259600	181.896	-1.04001	0.155239	3.47514e-12	4.84227e-11	UniRef100_A0A0B2Q568 Cytochrome b5 isoform 1 n=2 Tax=Soja TaxID=1462606 RepID=A0A0B2Q568_GLYSO
Glyma.03G258900	69.9053	-1.04012	0.249566	4.74014e-06	3.24426e-05	UniRef100_I1JS14 LRAT domain-containing protein n=2 Tax=Soja TaxID=1462606 RepID=I1JS14_SOYBN
Glyma.09G256100	600.544	-1.04035	0.102106	3.95569e-25	1.19655e-23	UniRef100_I1L6G7 Pectate_lyase_3 domain-containing protein n=2 Tax=Soja TaxID=1462606 RepID=I1L6G7_SOYBN
Glyma.05G138700	659.558	-1.04091	0.0927888	5.80512e-30	2.19084e-28	UniRef100_A0A445KNL1 Xyloglucan endotransglucosylase/hydrolase n=2 Tax=Soja TaxID=1462606 RepID=A0A445KNL1_GLYSO
Glyma.13G217400	757.987	-1.04106	0.0939585	2.72403e-29	1.00391e-27	UniRef100_I1M1E5 Uncharacterized protein n=1 Tax=Glycine max TaxID=3847 RepID=I1M1E5_SOYBN
Glyma.20G169200	4619.68	-1.04222	0.0628866	2.46626e-62	2.44708e-60	UniRef100_I1NH45 Peroxidase n=1 Tax=Glycine max TaxID=3847 RepID=I1NH45_SOYBN
Glyma.02G181500	150.376	-1.0428	0.173202	2.85078e-10	3.32564e-09	UniRef100_I1JG73 EGF-like domain-containing protein n=3 Tax=Soja TaxID=1462606 RepID=I1JG73_SOYBN
Glyma.13G307000	263.81	-1.04428	0.138835	9.08388e-15	1.53957e-13	UniRef100_A0A0R0GXD9 Peroxidase n=3 Tax=Soja TaxID=1462606 RepID=A0A0R0GXD9_SOYBN
Glyma.13G112500	47.5021	-1.04432	0.296976	6.35056e-05	0.000353574	UniRef100_I1LY84 Uncharacterized protein n=1 Tax=Glycine max TaxID=3847 RepID=I1LY84_SOYBN
Glyma.07G238400	78.3391	-1.04442	0.246548	3.42635e-06	2.40618e-05	UniRef100_I1KMP8 DNA helicase n=1 Tax=Glycine max TaxID=3847 RepID=I1KMP8_SOYBN
Glyma.19G144100	108.202	-1.04519	0.202298	3.86129e-08	3.55398e-07	UniRef100_I1N946 Protein kinase domain-containing protein n=2 Tax=Soja TaxID=1462606 RepID=I1N946_SOYBN
Glyma.10G130200	332.644	-1.04549	0.123719	4.81898e-18	9.9855e-17	UniRef100_I1LAN6 Uncharacterized protein n=2 Tax=Soja TaxID=1462606 RepID=I1LAN6_SOYBN
Glyma.06G002900	2036.64	-1.04603	0.063719	2.588e-61	2.50592e-59	UniRef100_P45621 Glutamate-1-semialdehyde 2,1-aminomutase, chloroplastic n=4 Tax=Soja TaxID=1462606 RepID=GSA_SOYBN
Glyma.01G076200	55.7369	-1.0472	0.301472	7.50071e-05	0.000410833	UniRef100_A0A0B2SXK6 Uncharacterized protein n=2 Tax=Soja TaxID=1462606 RepID=A0A0B2SXK6_GLYSO
Glyma.06G131800	282.663	-1.04781	0.139505	9.76125e-15	1.64973e-13	UniRef100_I1KAW1 Uncharacterized protein n=3 Tax=Soja TaxID=1462606 RepID=I1KAW1_SOYBN
Glyma.06G190800	102.867	-1.04836	0.203912	4.41466e-08	4.03248e-07	UniRef100_I1KCP9 WRKY domain-containing protein n=3 Tax=Soja TaxID=1462606 RepID=I1KCP9_SOYBN
Glyma.11G061100	654.936	-1.04926	0.0909237	1.39749e-31	5.76178e-30	UniRef100_A0A445HXS8 Uncharacterized protein n=1 Tax=Glycine soja TaxID=3848 RepID=A0A445HXS8_GLYSO
Glyma.07G009000	60.0165	-1.04938	0.265264	1.1514e-05	7.39289e-05	UniRef100_UPI00023C7EB2 uncharacterized protein LOC100786919 isoform X1 n=1 Tax=Glycine max TaxID=3847 RepID=UPI00023C7EB2
Glyma.06G092100	1353.7	-1.04959	0.0910369	1.57866e-31	6.4865e-30	UniRef100_I1K9L2 Uncharacterized protein n=2 Tax=Soja TaxID=1462606 RepID=I1K9L2_SOYBN
Glyma.08G062600	260.775	-1.04961	0.132768	4.42994e-16	8.23449e-15	UniRef100_A0A445JAR0 Sulfite exporter TauE/SafE family protein 2 n=3 Tax=Soja TaxID=1462606 RepID=A0A445JAR0_GLYSO
Glyma.12G204600	41.8933	-1.05014	0.345832	0.000325707	0.0015643	UniRef100_A0A445HT67 Uncharacterized protein n=2 Tax=Soja TaxID=1462606 RepID=A0A445HT67_GLYSO
Glyma.13G293500	308.698	-1.05067	0.126737	1.90002e-17	3.80604e-16	UniRef100_A0A0R0GWM0 FAS1 domain-containing protein n=2 Tax=Soja TaxID=1462606 RepID=A0A0R0GWM0_SOYBN
Glyma.02G234000	1956.52	-1.05207	0.0646082	2.19183e-60	2.05617e-58	UniRef100_I1JHK1 Peroxidase n=1 Tax=Glycine max TaxID=3847 RepID=I1JHK1_SOYBN
Glyma.17G136500	29.5554	-1.05227	0.384542	0.000812807	0.00357435	UniRef100_K7MLI3 Protein DETOXIFICATION n=2 Tax=Soja TaxID=1462606 RepID=K7MLI3_SOYBN
Glyma.17G031500	801.01	-1.05236	0.0877446	6.52698e-34	2.91751e-32	UniRef100_A0A445G112 Uncharacterized protein n=3 Tax=Soja TaxID=1462606 RepID=A0A445G112_GLYSO
Glyma.07G141500	2208.81	-1.0526	0.0701495	1.20418e-51	8.93046e-50	UniRef100_A0A0R0J344 AAI domain-containing protein n=3 Tax=Soja TaxID=1462606 RepID=A0A0R0J344_SOYBN
Glyma.20G083800	1019.21	-1.05422	0.0821775	1.94459e-38	1.03132e-36	UniRef100_A0A368RZS7 Histone H4 n=1 Tax=Setaria italica TaxID=4555 RepID=A0A368RZS7_SETIT
Glyma.03G177500	74.6098	-1.05461	0.240609	1.79728e-06	1.31341e-05	UniRef100_I1JPI9 Uncharacterized protein n=1 Tax=Glycine max TaxID=3847 RepID=I1JPI9_SOYBN
Glyma.06G080200	26.0318	-1.05566	0.411732	0.00130059	0.00542418	UniRef100_I1K975 NAC domain-containing protein n=3 Tax=Soja TaxID=1462606 RepID=I1K975_SOYBN
Glyma.15G143300	496.822	-1.05596	0.114501	4.91155e-21	1.20838e-19	UniRef100_A0A0B2Q4B3 GTP-binding protein SAR1A n=2 Tax=Soja TaxID=1462606 RepID=A0A0B2Q4B3_GLYSO
Glyma.16G173100	195.555	-1.0564	0.155742	1.94061e-12	2.75075e-11	UniRef100_I1MPC6 Pyruvate kinase n=1 Tax=Glycine max TaxID=3847 RepID=I1MPC6_SOYBN
Glyma.03G050200	27.114	-1.05666	0.408719	0.00122385	0.00514691	UniRef100_A0A445L8B5 Uncharacterized protein n=1 Tax=Glycine soja TaxID=3848 RepID=A0A445L8B5_GLYSO
Glyma.19G215500	75.4162	-1.0567	0.263049	8.74032e-06	5.7364e-05	UniRef100_I1NBB5 Fn3_like domain-containing protein n=6 Tax=Soja TaxID=1462606 RepID=I1NBB5_SOYBN
Glyma.01G019200	667.819	-1.05687	0.110482	1.82934e-22	4.85811e-21	UniRef100_I1J4W3 Uncharacterized protein n=1 Tax=Glycine max TaxID=3847 RepID=I1J4W3_SOYBN
Glyma.12G225600	57.7332	-1.05717	0.287149	3.32759e-05	0.000196345	UniRef100_UPI000719216B protein DETOXIFICATION 18 isoform X1 n=1 Tax=Glycine max TaxID=3847 RepID=UPI000719216B
Glyma.11G011500	4606.04	-1.05725	0.0771314	1.54957e-43	9.28123e-42	UniRef100_I1LG10 Uncharacterized protein n=3 Tax=Soja TaxID=1462606 RepID=I1LG10_SOYBN
Glyma.20G189300	2617.56	-1.05771	0.0659635	1.2153e-58	1.07845e-56	UniRef100_A0A0R4J669 Pyruvate kinase n=3 Tax=Soja TaxID=1462606 RepID=A0A0R4J669_SOYBN
Glyma.07G058800	425.511	-1.05798	0.111585	4.1113e-22	1.0698e-20	UniRef100_I1KHY6 SATase_N domain-containing protein n=2 Tax=Soja TaxID=1462606 RepID=I1KHY6_SOYBN
Glyma.18G269800	51.0668	-1.05819	0.295909	4.94576e-05	0.000281922	UniRef100_K7MV00 Uncharacterized protein n=1 Tax=Glycine max TaxID=3847 RepID=K7MV00_SOYBN
Glyma.02G139500	271.208	-1.05962	0.139565	5.23673e-15	9.02362e-14	UniRef100_I1JF17 Formin-like protein n=1 Tax=Glycine max TaxID=3847 RepID=I1JF17_SOYBN
Glyma.02G023900	81.0621	-1.06072	0.240617	1.54707e-06	1.14031e-05	UniRef100_C6ZS33 TIR-NBS disease resistance-like protein n=3 Tax=Soja TaxID=1462606 RepID=C6ZS33_SOYBN
Glyma.08G324500	110.94	-1.06093	0.206988	4.70692e-08	4.28751e-07	UniRef100_I1KYF2 Uncharacterized protein n=1 Tax=Glycine max TaxID=3847 RepID=I1KYF2_SOYBN
Glyma.18G201900	460.114	-1.0613	0.103422	1.76327e-25	5.41991e-24	UniRef100_UPI0007192215 LOW QUALITY PROTEIN: probable 2-oxoglutarate-dependent dioxygenase At5g05600 n=1 Tax=Glycine max TaxID=3847 RepID=UPI0007192215
Glyma.20G227200	1992.75	-1.06231	0.0682653	2.26588e-55	1.85993e-53	UniRef100_A0A0R0EFC2 Uncharacterized protein n=2 Tax=Glycine max TaxID=3847 RepID=A0A0R0EFC2_SOYBN
Glyma.18G127900	170.388	-1.06231	0.156195	1.6901e-12	2.40415e-11	UniRef100_C6ZS22 TIR-NBS-LRR type disease resistance protein n=1 Tax=Glycine max TaxID=3847 RepID=C6ZS22_SOYBN
Glyma.16G152100	83.0386	-1.06286	0.232084	7.13525e-07	5.54202e-06	UniRef100_A0A0B2RLC1 NAC domain-containing protein 100 n=3 Tax=Soja TaxID=1462606 RepID=A0A0B2RLC1_GLYSO
Glyma.14G222000	39.8054	-1.06307	0.347023	0.000287335	0.00139717	UniRef100_K7M8I6 Uncharacterized protein n=2 Tax=Soja TaxID=1462606 RepID=K7M8I6_SOYBN
Glyma.09G231600	105.464	-1.06373	0.244658	2.0158e-06	1.46341e-05	UniRef100_UPI00071936C0 agamous-like MADS-box protein AGL12 isoform X1 n=1 Tax=Glycine max TaxID=3847 RepID=UPI00071936C0
Glyma.17G229300	204.096	-1.06457	0.164148	1.43074e-11	1.88868e-10	UniRef100_C6THD5 Uncharacterized protein n=2 Tax=Soja TaxID=1462606 RepID=C6THD5_SOYBN
Glyma.18G235400	143.686	-1.0648	0.181782	7.39953e-10	8.24587e-09	UniRef100_A0A0B2NVR7 Transmembrane protein 8B n=2 Tax=Soja TaxID=1462606 RepID=A0A0B2NVR7_GLYSO
Glyma.13G139300	198.216	-1.06519	0.166949	2.85757e-11	3.67938e-10	UniRef100_I1LZ39 Methyltransf_11 domain-containing protein n=1 Tax=Glycine max TaxID=3847 RepID=I1LZ39_SOYBN
Glyma.02G033400	29.1925	-1.06616	0.390446	0.000811866	0.00357174	UniRef100_I1JC13 Uncharacterized protein n=1 Tax=Glycine max TaxID=3847 RepID=I1JC13_SOYBN
Glyma.18G282600	46.1888	-1.06757	0.300388	5.43857e-05	0.000307341	UniRef100_K7MV88 Dirigent protein n=1 Tax=Glycine max TaxID=3847 RepID=K7MV88_SOYBN
Glyma.07G134100	50.4843	-1.06793	0.296258	4.44819e-05	0.000256025	UniRef100_I1KK09 Laccase n=1 Tax=Glycine max TaxID=3847 RepID=I1KK09_SOYBN
Glyma.19G142300	45.5416	-1.06835	0.310833	8.15183e-05	0.000443336	UniRef100_A0A445FGB6 Oligopeptide transporter 1 isoform B n=2 Tax=Soja TaxID=1462606 RepID=A0A445FGB6_GLYSO
Glyma.07G079500	85.6222	-1.06882	0.226349	3.50023e-07	2.83681e-06	UniRef100_K7L0C9 Uncharacterized protein n=1 Tax=Glycine max TaxID=3847 RepID=K7L0C9_SOYBN
Glyma.19G003600	39.9326	-1.07004	0.354739	0.000332526	0.00159493	UniRef100_I1N5K0 Uncharacterized protein n=3 Tax=Soja TaxID=1462606 RepID=I1N5K0_SOYBN
Glyma.10G118900	2326.29	-1.07042	0.0702558	3.3779e-53	2.60683e-51	UniRef100_A0A0B2REI9 Ethylene-responsive transcription factor ERF105 n=2 Tax=Soja TaxID=1462606 RepID=A0A0B2REI9_GLYSO
Glyma.20G144300	2371.61	-1.07047	0.0746101	1.8509e-47	1.24024e-45	UniRef100_I1NGC7 MFS domain-containing protein n=1 Tax=Glycine max TaxID=3847 RepID=I1NGC7_SOYBN
Glyma.02G061700	265.997	-1.07107	0.136362	6.52311e-16	1.19713e-14	UniRef100_A0A445LKL2 Wall-associated receptor kinase-like 14 isoform A n=1 Tax=Glycine soja TaxID=3848 RepID=A0A445LKL2_GLYSO
Glyma.19G198700	145.962	-1.07134	0.171167	6.15656e-11	7.6754e-10	UniRef100_C6TFU0 LEA_2 domain-containing protein n=2 Tax=Soja TaxID=1462606 RepID=C6TFU0_SOYBN
Glyma.18G001300	35.5989	-1.0732	0.360681	0.00037729	0.00179226	UniRef100_I1MY91 Purple acid phosphatase n=2 Tax=Soja TaxID=1462606 RepID=I1MY91_SOYBN
Glyma.02G148200	1328.23	-1.07382	0.0873442	1.64062e-35	7.85863e-34	UniRef100_A0A0R4J2Q1 Peptidase A1 domain-containing protein n=3 Tax=Soja TaxID=1462606 RepID=A0A0R4J2Q1_SOYBN
Glyma.06G261400	393.311	-1.07385	0.115822	2.88556e-21	7.18249e-20	UniRef100_A0A0R0JT19 Uncharacterized protein n=1 Tax=Glycine max TaxID=3847 RepID=A0A0R0JT19_SOYBN
Glyma.08G169800	2139.53	-1.07413	0.0731521	1.3996e-49	9.83452e-48	UniRef100_I1KU18 Uncharacterized protein n=2 Tax=Soja TaxID=1462606 RepID=I1KU18_SOYBN
Glyma.12G101200	246.558	-1.07469	0.148389	6.85167e-14	1.08393e-12	UniRef100_A0A0R0HGS5 Peroxidase n=1 Tax=Glycine max TaxID=3847 RepID=A0A0R0HGS5_SOYBN
Glyma.10G194200	172.758	-1.07546	0.387609	0.000666789	0.00299644	UniRef100_I1LCJ0 AP2/ERF domain-containing protein n=2 Tax=Soja TaxID=1462606 RepID=I1LCJ0_SOYBN
Glyma.17G019300	1497.23	-1.07644	0.0832172	4.69174e-39	2.54432e-37	UniRef100_I1MRA7 Amine oxidase n=2 Tax=Soja TaxID=1462606 RepID=I1MRA7_SOYBN
Glyma.18G030300	75.1416	-1.07682	0.255355	3.52487e-06	2.4696e-05	UniRef100_K7MPL9 Uncharacterized protein n=1 Tax=Glycine max TaxID=3847 RepID=K7MPL9_SOYBN
Glyma.03G105500	80.6608	-1.07689	0.230479	4.43092e-07	3.53583e-06	UniRef100_K7KE92 Protein kinase domain-containing protein n=1 Tax=Glycine max TaxID=3847 RepID=K7KE92_SOYBN
Glyma.02G135400	290.929	-1.07726	0.127508	4.79075e-18	9.9384e-17	UniRef100_A0A0B2RZ42 Myb family transcription factor EFM isoform A n=2 Tax=Soja TaxID=1462606 RepID=A0A0B2RZ42_GLYSO
Glyma.13G362400	1461.99	-1.07809	0.0749223	9.97779e-48	6.79939e-46	UniRef100_I1M5Q5 AB hydrolase-1 domain-containing protein n=2 Tax=Glycine max TaxID=3847 RepID=I1M5Q5_SOYBN
Glyma.02G104300	182.129	-1.07868	0.175285	1.18698e-10	1.43859e-09	UniRef100_I1JE14 Glycosyltransferase n=2 Tax=Soja TaxID=1462606 RepID=I1JE14_SOYBN
Glyma.10G256200	269.724	-1.07925	0.133437	9.61056e-17	1.85024e-15	UniRef100_I1LED4 Cyclin N-terminal domain-containing protein n=2 Tax=Soja TaxID=1462606 RepID=I1LED4_SOYBN
Glyma.08G179700	887.423	-1.07986	0.0906585	1.7384e-33	7.68494e-32	UniRef100_C6TED1 Peroxidase n=2 Tax=Soja TaxID=1462606 RepID=C6TED1_SOYBN
Glyma.17G228400	83.1009	-1.08	0.24488	1.52486e-06	1.12509e-05	UniRef100_A0A445GAM3 Acyl-lipid (9-3)-desaturase isoform A n=2 Tax=Soja TaxID=1462606 RepID=A0A445GAM3_GLYSO
Glyma.17G156900	695.158	-1.0802	0.108019	2.48393e-24	7.28182e-23	UniRef100_I1K2I2 Tubulin alpha chain n=1 Tax=Glycine max TaxID=3847 RepID=I1K2I2_SOYBN
Glyma.12G053300	316.67	-1.08056	0.128309	5.91053e-18	1.21914e-16	UniRef100_I1LQF2 Uncharacterized protein n=2 Tax=Soja TaxID=1462606 RepID=I1LQF2_SOYBN
Glyma.19G126700	32.1155	-1.0814	0.375251	0.000501758	0.00232244	UniRef100_I1N8N4 PsbP domain-containing protein n=3 Tax=Soja TaxID=1462606 RepID=I1N8N4_SOYBN
Glyma.11G254600	27.7298	-1.08167	0.424515	0.00128294	0.00535942	UniRef100_I1LN31 Uncharacterized protein n=2 Tax=Soja TaxID=1462606 RepID=I1LN31_SOYBN
Glyma.14G144300	228.442	-1.08195	0.138455	8.81664e-16	1.60338e-14	UniRef100_K7M6S1 Protein kinase domain-containing protein n=2 Tax=Soja TaxID=1462606 RepID=K7M6S1_SOYBN
Glyma.20G177800	452.529	-1.0822	0.104757	8.30695e-26	2.5931e-24	UniRef100_I1NHD3 EF-hand domain-containing protein n=2 Tax=Soja TaxID=1462606 RepID=I1NHD3_SOYBN
Glyma.19G129600	67.6037	-1.08223	0.257933	3.95575e-06	2.74856e-05	UniRef100_I1N8R4 F-box domain-containing protein n=3 Tax=Soja TaxID=1462606 RepID=I1N8R4_SOYBN
Glyma.02G062700	25.3325	-1.08256	0.413664	0.00107808	0.00459217	UniRef100_K7K6R9 Dof-type domain-containing protein n=2 Tax=Soja TaxID=1462606 RepID=K7K6R9_SOYBN
Glyma.04G064500	24.4648	-1.08321	0.449905	0.0018551	0.00742061	UniRef100_K7KIG6 Uncharacterized protein n=2 Tax=Soja TaxID=1462606 RepID=K7KIG6_SOYBN
Glyma.16G204600	4813.97	-1.08441	0.0565073	6.93192e-83	1.06992e-80	UniRef100_I1MQ89 Uncharacterized protein n=3 Tax=Soja TaxID=1462606 RepID=I1MQ89_SOYBN
Glyma.11G139800	29.2072	-1.08459	0.40815	0.000949245	0.00409849	UniRef100_I1LK30 Uncharacterized protein n=3 Tax=indigoferoid/millettioid clade TaxID=2233855 RepID=I1LK30_SOYBN
Glyma.10G268900	282.296	-1.0847	0.134354	1.11041e-16	2.12645e-15	UniRef100_I1LER5 RING-type domain-containing protein n=1 Tax=Glycine max TaxID=3847 RepID=I1LER5_SOYBN
Glyma.02G285800	27.247	-1.08697	0.447813	0.00175061	0.00704399	UniRef100_I1JJ36 Uncharacterized protein n=1 Tax=Glycine max TaxID=3847 RepID=I1JJ36_SOYBN
Glyma.15G040200	335.853	-1.08742	0.129311	6.51639e-18	1.33647e-16	UniRef100_C6SWA6 Histone H2A n=2 Tax=Soja TaxID=1462606 RepID=C6SWA6_SOYBN
Glyma.03G262500	145.676	-1.08744	0.182955	4.19939e-10	4.82202e-09	UniRef100_A0A445LHG4 Tyrosine-sulfated glycopeptide receptor 1 isoform B n=2 Tax=Glycine soja TaxID=3848 RepID=A0A445LHG4_GLYSO
Glyma.07G033000	27.2912	-1.08752	0.391937	0.000692294	0.00309949	UniRef100_I1KH49 AB hydrolase-1 domain-containing protein n=2 Tax=Soja TaxID=1462606 RepID=I1KH49_SOYBN
Glyma.03G192300	353.629	-1.08899	0.120434	2.43036e-20	5.79389e-19	UniRef100_I1JPY7 Aamy domain-containing protein n=5 Tax=Soja TaxID=1462606 RepID=I1JPY7_SOYBN
Glyma.09G255700	526.811	-1.08908	0.0981102	1.94979e-29	7.22263e-28	UniRef100_I1L6G3 Protein kinase domain-containing protein n=1 Tax=Glycine max TaxID=3847 RepID=I1L6G3_SOYBN
Glyma.18G184100	20.4526	-1.09092	0.475964	0.00241049	0.00933314	UniRef100_A0A0B2Q1Z8 Fimbrin-5 n=2 Tax=Soja TaxID=1462606 RepID=A0A0B2Q1Z8_GLYSO
Glyma.04G041500	442.445	-1.09122	0.109609	3.83313e-24	1.11287e-22	UniRef100_I1JTM0 Uncharacterized protein n=1 Tax=Glycine max TaxID=3847 RepID=I1JTM0_SOYBN
Glyma.02G182400	149.851	-1.09136	0.193832	2.69204e-09	2.83052e-08	UniRef100_A0A0R0L847 Guanylate kinase-like domain-containing protein n=1 Tax=Glycine max TaxID=3847 RepID=A0A0R0L847_SOYBN
Glyma.04G091600	216.24	-1.09251	0.147115	1.7642e-14	2.91747e-13	UniRef100_I1JV30 AT-hook motif nuclear-localized protein n=2 Tax=Soja TaxID=1462606 RepID=I1JV30_SOYBN
Glyma.06G122700	31.4159	-1.09381	0.425451	0.00116117	0.00491018	UniRef100_K7KUN5 PMR5N domain-containing protein n=1 Tax=Glycine max TaxID=3847 RepID=K7KUN5_SOYBN
Glyma.17G005100	196.011	-1.09409	0.168177	1.15241e-11	1.53358e-10	UniRef100_I1MQW9 CRAL-TRIO domain-containing protein n=4 Tax=Soja TaxID=1462606 RepID=I1MQW9_SOYBN
Glyma.13G162600	899.484	-1.09415	0.0890611	1.71354e-35	8.19706e-34	UniRef100_I1LZT6 Uncharacterized protein n=2 Tax=Soja TaxID=1462606 RepID=I1LZT6_SOYBN
Glyma.02G259700	2198.71	-1.09434	0.0834627	4.45803e-40	2.47328e-38	UniRef100_C6T5L8 HIG1 domain-containing protein n=2 Tax=Soja TaxID=1462606 RepID=C6T5L8_SOYBN
Glyma.03G040500	66.9971	-1.09451	0.266697	5.62918e-06	3.80301e-05	UniRef100_I1JL12 ACT domain-containing protein n=1 Tax=Glycine max TaxID=3847 RepID=I1JL12_SOYBN
Glyma.09G159900	25.2337	-1.09524	0.438195	0.00143435	0.00591982	UniRef100_K7LE80 Uncharacterized protein n=2 Tax=Soja TaxID=1462606 RepID=K7LE80_SOYBN
Glyma.11G189500	129.093	-1.09529	0.193176	2.21818e-09	2.35352e-08	UniRef100_I1LKW2 C2H2-type domain-containing protein n=1 Tax=Glycine max TaxID=3847 RepID=I1LKW2_SOYBN
Glyma.01G081300	297.164	-1.0954	0.147218	1.56764e-14	2.60315e-13	UniRef100_A0A0B2QW88 Alpha-xylosidase n=2 Tax=Soja TaxID=1462606 RepID=A0A0B2QW88_GLYSO
Glyma.12G241700	386.665	-1.09567	0.115584	3.86223e-22	1.00789e-20	UniRef100_A0A445HV13 Ethylene receptor n=2 Tax=Soja TaxID=1462606 RepID=A0A445HV13_GLYSO
Glyma.10G180000	75.2666	-1.09631	0.24003	7.0945e-07	5.51274e-06	UniRef100_A0A445IP63 Auxin-induced protein n=2 Tax=Soja TaxID=1462606 RepID=A0A445IP63_GLYSO
Glyma.07G264100	86.8649	-1.09742	0.222236	1.17121e-07	1.01684e-06	UniRef100_A0A445K2D0 RING-type domain-containing protein n=1 Tax=Glycine soja TaxID=3848 RepID=A0A445K2D0_GLYSO
Glyma.13G057700	422.925	-1.09746	0.143455	3.20671e-15	5.61671e-14	UniRef100_A0A0B2PHE7 UDP-glucose 6-dehydrogenase n=2 Tax=Soja TaxID=1462606 RepID=A0A0B2PHE7_GLYSO
Glyma.17G178500	191.082	-1.10035	0.156899	3.64652e-13	5.46252e-12	UniRef100_A0A0R0FMS0 HTH myb-type domain-containing protein n=1 Tax=Glycine max TaxID=3847 RepID=A0A0R0FMS0_SOYBN
Glyma.14G194300	89.7124	-1.10101	0.237136	5.01445e-07	3.97251e-06	UniRef100_I1MBB6 Omega-3 fatty acid desaturase A n=4 Tax=Soja TaxID=1462606 RepID=I1MBB6_SOYBN
Glyma.11G042600	71.4118	-1.10108	0.249458	1.44026e-06	1.06703e-05	UniRef100_I1LH09 RING-type domain-containing protein n=3 Tax=Soja TaxID=1462606 RepID=I1LH09_SOYBN
Glyma.07G089800	33.3756	-1.10124	0.372693	0.000391979	0.00185521	UniRef100_I1KIV1 Uncharacterized protein n=1 Tax=Glycine max TaxID=3847 RepID=I1KIV1_SOYBN
Glyma.10G206800	239.009	-1.10129	0.178272	9.45255e-11	1.15657e-09	UniRef100_A0A0R0I4K7 Uncharacterized protein n=1 Tax=Glycine max TaxID=3847 RepID=A0A0R0I4K7_SOYBN
Glyma.03G004300	470.497	-1.1013	0.109811	1.71528e-24	5.05721e-23	UniRef100_I1JK28 FSH1 domain-containing protein n=3 Tax=Soja TaxID=1462606 RepID=I1JK28_SOYBN
Glyma.10G016100	71.1576	-1.10381	0.240846	6.57749e-07	5.13419e-06	UniRef100_I1L7S8 Uncharacterized protein n=2 Tax=Glycine max TaxID=3847 RepID=I1L7S8_SOYBN
Glyma.15G056900	167.979	-1.10521	0.16572	3.93115e-12	5.44198e-11	UniRef100_A0A445GPL7 Uncharacterized protein n=2 Tax=Soja TaxID=1462606 RepID=A0A445GPL7_GLYSO
Glyma.14G010600	40.5005	-1.10547	0.345301	0.000177962	0.000904128	UniRef100_I1M6D2 J domain-containing protein n=1 Tax=Glycine max TaxID=3847 RepID=I1M6D2_SOYBN
Glyma.05G196600	65.9519	-1.10566	0.255143	2.10985e-06	1.52708e-05	UniRef100_A0A0B2QC78 Probable magnesium transporter n=2 Tax=Soja TaxID=1462606 RepID=A0A0B2QC78_GLYSO
Glyma.15G203300	63.4708	-1.10571	0.272712	6.94885e-06	4.63133e-05	UniRef100_A0A0B2SLI4 Sugar transport protein 7 n=2 Tax=Soja TaxID=1462606 RepID=A0A0B2SLI4_GLYSO
Glyma.15G110200	91.1751	-1.10633	0.223324	1.08137e-07	9.42926e-07	UniRef100_A0A445GS64 Aspartic proteinase A1 isoform A n=2 Tax=Soja TaxID=1462606 RepID=A0A445GS64_GLYSO
Glyma.18G027500	22.5114	-1.1073	0.463137	0.00189272	0.00755018	UniRef100_A0A0R0EV61 Elf4 domain-containing protein n=2 Tax=Soja TaxID=1462606 RepID=A0A0R0EV61_SOYBN
Glyma.07G007700	85.6074	-1.10792	0.228812	1.8889e-07	1.59881e-06	UniRef100_K7KYW5 Phospholipid-transporting ATPase n=2 Tax=Glycine max TaxID=3847 RepID=K7KYW5_SOYBN
Glyma.02G000500	38.4675	-1.10812	0.358957	0.00025874	0.0012709	UniRef100_A0A0B2Q5Y8 Auxin-induced protein n=2 Tax=Soja TaxID=1462606 RepID=A0A0B2Q5Y8_GLYSO
Glyma.16G053200	119.558	-1.10851	0.185829	3.67436e-10	4.24391e-09	UniRef100_A0A0B2R3Q3 Uncharacterized protein n=2 Tax=Soja TaxID=1462606 RepID=A0A0B2R3Q3_GLYSO
Glyma.05G151200	26.3452	-1.10909	0.417035	0.000906748	0.00393627	UniRef100_I1K3R5 AMP-binding domain-containing protein n=1 Tax=Glycine max TaxID=3847 RepID=I1K3R5_SOYBN
Glyma.17G151800	131.386	-1.10985	0.195151	1.97397e-09	2.10617e-08	UniRef100_A0A0R0FD34 Uncharacterized protein n=2 Tax=Soja TaxID=1462606 RepID=A0A0R0FD34_SOYBN
Glyma.02G154900	50.2066	-1.1099	0.298455	2.74433e-05	0.000164674	UniRef100_K7K8J9 Uncharacterized protein n=1 Tax=Glycine max TaxID=3847 RepID=K7K8J9_SOYBN
Glyma.06G261500	440.136	-1.11142	0.126411	2.17155e-19	4.91416e-18	UniRef100_I1KEB4 TIR domain-containing protein n=1 Tax=Glycine max TaxID=3847 RepID=I1KEB4_SOYBN
Glyma.16G046400	153.116	-1.11169	0.17262	1.82374e-11	2.38393e-10	UniRef100_A0A445GEA8 Nudix hydrolase 12, mitochondrial isoform A n=2 Tax=Soja TaxID=1462606 RepID=A0A445GEA8_GLYSO
Glyma.13G186200	43.6283	-1.11176	0.314182	5.34367e-05	0.000302409	UniRef100_C6TDQ8 Oxidored_FMN domain-containing protein n=2 Tax=Soja TaxID=1462606 RepID=C6TDQ8_SOYBN
Glyma.17G251500	22.4919	-1.11212	0.439965	0.0013156	0.00547982	UniRef100_A0A0R0FIB7 Tubby-like F-box protein n=3 Tax=Soja TaxID=1462606 RepID=A0A0R0FIB7_SOYBN
Glyma.02G282100	56.283	-1.11251	0.306952	3.90414e-05	0.000227136	UniRef100_I1JJ02 BHLH domain-containing protein n=2 Tax=Soja TaxID=1462606 RepID=I1JJ02_SOYBN
Glyma.08G341300	234.339	-1.11275	0.138464	1.46356e-16	2.78208e-15	UniRef100_A0A0B2P2F7 Kunitz-type trypsin inhibitor KTI1 n=2 Tax=Soja TaxID=1462606 RepID=A0A0B2P2F7_GLYSO
Glyma.04G056900	115.147	-1.11275	0.18996	7.04032e-10	7.86257e-09	UniRef100_K7KIB4 Protein kinase domain-containing protein n=2 Tax=Soja TaxID=1462606 RepID=K7KIB4_SOYBN
Glyma.07G185300	83.7118	-1.11337	0.230023	1.84725e-07	1.56502e-06	UniRef100_K7L2J3 BHLH domain-containing protein n=1 Tax=Glycine max TaxID=3847 RepID=K7L2J3_SOYBN
Glyma.16G083300	85.2645	-1.11375	0.2465	8.91463e-07	6.83878e-06	UniRef100_A0A0B2P5N8 Protein PEP-RELATED DEVELOPMENT ARRESTED 1, chloroplastic isoform A n=2 Tax=Soja TaxID=1462606 RepID=A0A0B2P5N8_GLYSO
Glyma.16G021200	39.0558	-1.11422	0.331705	0.000101679	0.000543004	UniRef100_I1MKF4 Uncharacterized protein n=2 Tax=Soja TaxID=1462606 RepID=I1MKF4_SOYBN
Glyma.18G187800	104.64	-1.11463	0.228239	1.469e-07	1.26173e-06	UniRef100_I1N2M8 Uncharacterized protein n=1 Tax=Glycine max TaxID=3847 RepID=I1N2M8_SOYBN
Glyma.11G029400	22.5333	-1.11482	0.457885	0.00167198	0.00676837	UniRef100_I1LGL0 Uncharacterized protein n=1 Tax=Glycine max TaxID=3847 RepID=I1LGL0_SOYBN
Glyma.04G222800	111.587	-1.11546	0.19649	2.06018e-09	2.19297e-08	UniRef100_I1JYC1 Protein kinase domain-containing protein n=2 Tax=Soja TaxID=1462606 RepID=I1JYC1_SOYBN
Glyma.14G201100	30.896	-1.11573	0.383247	0.000440596	0.00206635	UniRef100_I1JJX3 Uncharacterized protein n=1 Tax=Glycine max TaxID=3847 RepID=I1JJX3_SOYBN
Glyma.15G260700	6335.03	-1.1168	0.168653	5.31261e-12	7.27077e-11	UniRef100_I1MJB7 Peptidase A1 domain-containing protein n=1 Tax=Glycine max TaxID=3847 RepID=I1MJB7_SOYBN
Glyma.11G197001	134.334	-1.11704	0.208868	1.30415e-08	1.26737e-07	UniRef100_UPI000233C53E E3 ubiquitin-protein ligase WAV3 n=1 Tax=Glycine max TaxID=3847 RepID=UPI000233C53E
Glyma.06G114800	1993.29	-1.11802	0.081215	6.56675e-44	4.01985e-42	UniRef100_I1KAB7 Protein disulfide-isomerase n=1 Tax=Glycine max TaxID=3847 RepID=I1KAB7_SOYBN
Glyma.09G128300	219.372	-1.11898	0.15784	2.05986e-13	3.14304e-12	UniRef100_I1L2Z0 Glycosyltransferase n=3 Tax=Soja TaxID=1462606 RepID=I1L2Z0_SOYBN
Glyma.05G000900	48.8049	-1.11924	0.297288	2.26665e-05	0.000138215	UniRef100_A0A0B2QDQ7 Actin n=2 Tax=Soja TaxID=1462606 RepID=A0A0B2QDQ7_GLYSO
Glyma.15G173400	21.4123	-1.11966	0.449131	0.0014393	0.00593685	UniRef100_I1MHB6 Uncharacterized protein n=2 Tax=Soja TaxID=1462606 RepID=I1MHB6_SOYBN
Glyma.17G078300	171.415	-1.11993	0.164237	1.39974e-12	2.00634e-11	UniRef100_I1MT65 FAD-binding FR-type domain-containing protein n=3 Tax=Soja TaxID=1462606 RepID=I1MT65_SOYBN
Glyma.02G303200	54.1609	-1.12021	0.286209	1.23668e-05	7.88996e-05	UniRef100_I1JJM5 Uncharacterized protein n=3 Tax=Soja TaxID=1462606 RepID=I1JJM5_SOYBN
Glyma.15G276100	17.891	-1.12068	0.49786	0.00257762	0.00990488	UniRef100_C6T8R3 Uncharacterized protein n=1 Tax=Glycine max TaxID=3847 RepID=C6T8R3_SOYBN
Glyma.16G189000	93.7705	-1.12161	0.218543	4.22761e-08	3.87401e-07	UniRef100_K7MIC4 CAP10 domain-containing protein n=1 Tax=Glycine max TaxID=3847 RepID=K7MIC4_SOYBN
Glyma.06G148500	43.7362	-1.12167	0.332731	9.55402e-05	0.000513104	UniRef100_I1KBD9 Ribonucleoside-diphosphate reductase n=2 Tax=Soja TaxID=1462606 RepID=I1KBD9_SOYBN
Glyma.01G084600	329.473	-1.12237	0.142243	4.62184e-16	8.58237e-15	UniRef100_I1J6N3 Peptidase A1 domain-containing protein n=3 Tax=Soja TaxID=1462606 RepID=I1J6N3_SOYBN
Glyma.19G028500	379.684	-1.12246	0.120793	2.33906e-21	5.84634e-20	UniRef100_A0A0B2SV74 UDP-glucose 6-dehydrogenase n=2 Tax=Soja TaxID=1462606 RepID=A0A0B2SV74_GLYSO
Glyma.02G073600	96.4964	-1.12739	0.2114	1.37998e-08	1.33478e-07	UniRef100_A0A0R0KTP5 Uncharacterized protein n=2 Tax=Soja TaxID=1462606 RepID=A0A0R0KTP5_SOYBN
Glyma.12G032800	59.8372	-1.12751	0.263192	2.56156e-06	1.82874e-05	UniRef100_I1LPS4 UBIQUITIN_CONJUGAT_2 domain-containing protein n=2 Tax=Soja TaxID=1462606 RepID=I1LPS4_SOYBN
Glyma.03G127700	32.2862	-1.12763	0.384165	0.000398908	0.00188726	UniRef100_K7KEP2 Uncharacterized protein n=3 Tax=Soja TaxID=1462606 RepID=K7KEP2_SOYBN
Glyma.07G137100	48.5589	-1.12774	0.292066	1.51369e-05	9.49133e-05	UniRef100_I1KK35 Uncharacterized protein n=1 Tax=Glycine max TaxID=3847 RepID=I1KK35_SOYBN
Glyma.18G206000	311.743	-1.12803	0.144283	8.01243e-16	1.46302e-14	UniRef100_K7MTN5 Uncharacterized protein n=2 Tax=Soja TaxID=1462606 RepID=K7MTN5_SOYBN
Glyma.07G141000	480.17	-1.12823	0.104104	3.54488e-28	1.2394e-26	UniRef100_A0A445JWM0 Uncharacterized protein n=1 Tax=Glycine soja TaxID=3848 RepID=A0A445JWM0_GLYSO
Glyma.08G073100	26.1928	-1.12897	0.460798	0.00155046	0.00632958	UniRef100_K7L5E4 PUM-HD domain-containing protein n=1 Tax=Glycine max TaxID=3847 RepID=K7L5E4_SOYBN
Glyma.05G029700	62.5021	-1.13005	0.26141	2.1503e-06	1.55387e-05	UniRef100_K7KML2 Uncharacterized protein n=1 Tax=Glycine max TaxID=3847 RepID=K7KML2_SOYBN
Glyma.02G045500	49.4581	-1.13028	0.321751	5.72771e-05	0.000322274	UniRef100_UPI0003DED7DD bZIP transcription factor 27 n=1 Tax=Glycine max TaxID=3847 RepID=UPI0003DED7DD
Glyma.03G136300	41.5126	-1.13118	0.323584	6.04151e-05	0.000338192	UniRef100_A0A445LBI7 Uncharacterized protein n=1 Tax=Glycine soja TaxID=3848 RepID=A0A445LBI7_GLYSO
Glyma.19G016700	211.499	-1.13135	0.154557	3.67723e-14	5.9264e-13	UniRef100_I1N600 Uncharacterized protein n=2 Tax=Glycine max TaxID=3847 RepID=I1N600_SOYBN
Glyma.20G120250	32.9227	-1.1319	0.379768	0.000342487	0.00163879	UniRef100_A0A368UG96 Protein kinase domain-containing protein n=1 Tax=Glycine max TaxID=3847 RepID=A0A368UG96_SOYBN
Glyma.11G239700	32.4411	-1.132	0.386671	0.000402872	0.00190278	UniRef100_I1LNL3 Uncharacterized protein n=2 Tax=Soja TaxID=1462606 RepID=I1LNL3_SOYBN
Glyma.14G176600	1308.95	-1.13349	0.089703	2.04921e-37	1.05579e-35	UniRef100_A0A445H7H6 Phospho-2-dehydro-3-deoxyheptonate aldolase n=1 Tax=Glycine soja TaxID=3848 RepID=A0A445H7H6_GLYSO
Glyma.12G224400	58.1488	-1.13374	0.281825	7.7271e-06	5.11416e-05	UniRef100_K7LWD6 Uncharacterized protein n=1 Tax=Glycine max TaxID=3847 RepID=K7LWD6_SOYBN
Glyma.06G112900	38.408	-1.13587	0.335037	8.78745e-05	0.000475161	UniRef100_I1KA95 AMP-binding domain-containing protein n=1 Tax=Glycine max TaxID=3847 RepID=I1KA95_SOYBN
Glyma.06G019800	87.1022	-1.1362	0.235634	1.98906e-07	1.67652e-06	UniRef100_I1K7F4 Uncharacterized protein n=1 Tax=Glycine max TaxID=3847 RepID=I1K7F4_SOYBN
Glyma.15G054600	2674.62	-1.13858	0.0738016	1.6595e-54	1.33488e-52	UniRef100_I1MDX7 Uncharacterized protein n=2 Tax=Soja TaxID=1462606 RepID=I1MDX7_SOYBN
Glyma.10G207300	861.392	-1.13928	0.0903718	3.00265e-37	1.54263e-35	UniRef100_I1LCV9 Carboxypeptidase n=2 Tax=Soja TaxID=1462606 RepID=I1LCV9_SOYBN
Glyma.01G159700	189.448	-1.13981	0.154467	2.30569e-14	3.78005e-13	UniRef100_K7K449 Cyclin N-terminal domain-containing protein n=1 Tax=Glycine max TaxID=3847 RepID=K7K449_SOYBN
Glyma.19G218800	84.9329	-1.14119	0.224406	5.18056e-08	4.6988e-07	UniRef100_I1NBF1 Uncharacterized protein n=1 Tax=Glycine max TaxID=3847 RepID=I1NBF1_SOYBN
Glyma.14G090400	917.358	-1.14201	0.0957744	1.38336e-33	6.13039e-32	UniRef100_A0A445H3V0 Squalene monooxygenase isoform A n=2 Tax=Soja TaxID=1462606 RepID=A0A445H3V0_GLYSO
Glyma.13G001200	921.231	-1.14239	0.0919946	3.1318e-36	1.54524e-34	UniRef100_A0A445H9T1 Methionine gamma-lyase isoform A n=3 Tax=Soja TaxID=1462606 RepID=A0A445H9T1_GLYSO
Glyma.20G062700	7166.74	-1.14261	0.0606571	4.6363e-80	6.86267e-78	UniRef100_A0A0B2RSZ6 14 kDa proline-rich protein DC2.15 n=2 Tax=Soja TaxID=1462606 RepID=A0A0B2RSZ6_GLYSO
Glyma.08G047500	26.2859	-1.14432	0.438951	0.0010003	0.00429384	UniRef100_I1KQD6 Uncharacterized protein n=1 Tax=Glycine max TaxID=3847 RepID=I1KQD6_SOYBN
Glyma.08G113400	46.7714	-1.14489	0.30949	2.83268e-05	0.000169244	UniRef100_K7L630 Uncharacterized protein n=1 Tax=Glycine max TaxID=3847 RepID=K7L630_SOYBN
Glyma.20G181400	145.56	-1.1449	0.175593	1.00524e-11	1.34517e-10	UniRef100_UPI00103EC318 ABC transporter G family member 24-like isoform X1 n=1 Tax=Glycine soja TaxID=3848 RepID=UPI00103EC318
Glyma.09G266300	48.8941	-1.14497	0.2889	9.77586e-06	6.36515e-05	UniRef100_I1L6S1 PfkB domain-containing protein n=2 Tax=Soja TaxID=1462606 RepID=I1L6S1_SOYBN
Glyma.08G200900	21.7061	-1.14516	0.457186	0.00134611	0.00558952	UniRef100_A0A0B2P805 Uncharacterized protein n=2 Tax=Soja TaxID=1462606 RepID=A0A0B2P805_GLYSO
Glyma.01G148700	77.4034	-1.14673	0.243428	3.40034e-07	2.75916e-06	UniRef100_A0A0R0LAZ3 SET domain-containing protein n=2 Tax=Soja TaxID=1462606 RepID=A0A0R0LAZ3_SOYBN
Glyma.08G306500	83.9977	-1.14683	0.22844	7.22109e-08	6.43167e-07	UniRef100_I1KXY6 Uncharacterized protein n=1 Tax=Glycine max TaxID=3847 RepID=I1KXY6_SOYBN
Glyma.15G021202	22.3303	-1.14797	0.454837	0.00126508	0.00529813	UniRef100_A0A0R0G2Z5 Lipase_GDSL domain-containing protein n=1 Tax=Glycine max TaxID=3847 RepID=A0A0R0G2Z5_SOYBN
Glyma.18G295400	75.6425	-1.14806	0.242672	3.1045e-07	2.53391e-06	UniRef100_A0A445FZB2 Pentatricopeptide repeat-containing protein n=2 Tax=Glycine soja TaxID=3848 RepID=A0A445FZB2_GLYSO
Glyma.04G009600	81.6401	-1.14826	0.260146	1.32769e-06	9.87688e-06	UniRef100_A0A445KTV7 BEL1-like homeodomain protein 6 isoform A n=2 Tax=Soja TaxID=1462606 RepID=A0A445KTV7_GLYSO
Glyma.05G244200	62.8312	-1.14902	0.260808	1.41895e-06	1.05254e-05	UniRef100_A0A0R4J3B4 Uncharacterized protein n=1 Tax=Glycine max TaxID=3847 RepID=A0A0R4J3B4_SOYBN
Glyma.09G093400	178.982	-1.14904	0.167673	1.03463e-12	1.4965e-11	UniRef100_A0A0B2R922 Transmembrane protein n=5 Tax=Soja TaxID=1462606 RepID=A0A0B2R922_GLYSO
Glyma.15G208600	235.395	-1.14961	0.13934	2.38834e-17	4.74476e-16	UniRef100_I1MI30 Auxin efflux carrier component n=2 Tax=Soja TaxID=1462606 RepID=I1MI30_SOYBN
Glyma.11G209027	673.249	-1.15038	0.0923081	1.80166e-36	8.97526e-35	UniRef100_I1LM64 Amino_oxidase domain-containing protein n=1 Tax=Glycine max TaxID=3847 RepID=I1LM64_SOYBN
Glyma.17G063200	406.477	-1.15113	0.113211	4.28047e-25	1.29154e-23	UniRef100_A0A368RZS7 Histone H4 n=1 Tax=Setaria italica TaxID=4555 RepID=A0A368RZS7_SETIT
Glyma.13G146900	602.535	-1.15246	0.111864	1.01596e-25	3.15507e-24	UniRef100_A0A0R0GNK5 Pantothenate kinase 2 n=1 Tax=Glycine max TaxID=3847 RepID=A0A0R0GNK5_SOYBN
Glyma.10G111800	50.1896	-1.15274	0.306482	2.1929e-05	0.00013408	UniRef100_I1LA03 Uncharacterized protein n=2 Tax=Soja TaxID=1462606 RepID=I1LA03_SOYBN
Glyma.07G229000	105.256	-1.15291	0.198913	9.73157e-10	1.07222e-08	UniRef100_I1KMG7 Expansin n=2 Tax=Soja TaxID=1462606 RepID=I1KMG7_SOYBN
Glyma.13G037400	24.1242	-1.15317	0.515651	0.00247869	0.00956693	UniRef100_A0A445HAS1 Uncharacterized protein n=2 Tax=Soja TaxID=1462606 RepID=A0A445HAS1_GLYSO
Glyma.04G104600	1068.69	-1.15362	0.10098	5.35991e-31	2.16053e-29	UniRef100_A0A0B2QJ23 Pollen-specific protein C13 n=2 Tax=Soja TaxID=1462606 RepID=A0A0B2QJ23_GLYSO
Glyma.19G114600	79.0278	-1.15371	0.232012	9.13874e-08	8.02879e-07	UniRef100_K7MXW3 Uncharacterized protein n=1 Tax=Glycine max TaxID=3847 RepID=K7MXW3_SOYBN
Glyma.15G123200	514.301	-1.15385	0.133901	9.81593e-19	2.12416e-17	UniRef100_K7MAZ0 Hydrolase_4 domain-containing protein n=1 Tax=Glycine max TaxID=3847 RepID=K7MAZ0_SOYBN
Glyma.18G210700	22.0293	-1.15404	0.487195	0.00185743	0.00742744	UniRef100_K7MTR4 ACT domain-containing protein n=1 Tax=Glycine max TaxID=3847 RepID=K7MTR4_SOYBN
Glyma.14G000700	62.4608	-1.15577	0.275509	3.64852e-06	2.55276e-05	UniRef100_A0A0B2SJI0 Uncharacterized protein n=1 Tax=Glycine soja TaxID=3848 RepID=A0A0B2SJI0_GLYSO
Glyma.11G226900	748.009	-1.1566	0.0889979	1.98977e-39	1.08886e-37	UniRef100_A0A445HH10 Sedoheptulose-1,7-bisphosphatase, chloroplastic isoform B n=3 Tax=Soja TaxID=1462606 RepID=A0A445HH10_GLYSO
Glyma.11G043100	400.693	-1.15663	0.122823	6.79882e-22	1.7502e-20	UniRef100_I1LH16 AT-hook motif nuclear-localized protein n=2 Tax=Soja TaxID=1462606 RepID=I1LH16_SOYBN
Glyma.11G010500	2031.67	-1.15685	0.0730364	2.49249e-57	2.16397e-55	UniRef100_A0A445HVC2 4-coumarate--CoA ligase 2 isoform A n=4 Tax=Soja TaxID=1462606 RepID=A0A445HVC2_GLYSO
Glyma.01G052500	32.0838	-1.15843	0.376493	0.000244879	0.00121057	UniRef100_A0A0B2QX83 DUF246 domain-containing protein n=4 Tax=Soja TaxID=1462606 RepID=A0A0B2QX83_GLYSO
Glyma.02G168400	220.671	-1.15843	0.140787	2.8005e-17	5.54223e-16	UniRef100_A0A0B2NSG3 TNF receptor-associated factor family protein n=2 Tax=Soja TaxID=1462606 RepID=A0A0B2NSG3_GLYSO
Glyma.13G078500	19.4066	-1.15865	0.492639	0.00189755	0.00756696	UniRef100_K7LX64 Uncharacterized protein n=2 Tax=Glycine max TaxID=3847 RepID=K7LX64_SOYBN
Glyma.03G137400	65.5808	-1.15869	0.25073	5.15725e-07	4.08027e-06	UniRef100_K7KEW5 Uncharacterized protein n=2 Tax=Glycine max TaxID=3847 RepID=K7KEW5_SOYBN
Glyma.20G112200	25.483	-1.15974	0.41283	0.000566634	0.00259479	UniRef100_K7N2V0 INCENP_ARK-bind domain-containing protein n=1 Tax=Glycine max TaxID=3847 RepID=K7N2V0_SOYBN
Glyma.16G040300	316.526	-1.16049	0.132205	2.38612e-19	5.37614e-18	UniRef100_I1ML13 Uncharacterized protein n=1 Tax=Glycine max TaxID=3847 RepID=I1ML13_SOYBN
Glyma.17G092400	184.841	-1.16105	0.182323	2.68926e-11	3.46886e-10	UniRef100_A0A445G4B5 Spermidine synthase isoform A n=3 Tax=Soja TaxID=1462606 RepID=A0A445G4B5_GLYSO
Glyma.20G241800	21.6369	-1.16142	0.514958	0.00229616	0.00895092	UniRef100_A0A0R0ERX9 Peroxidase n=3 Tax=Soja TaxID=1462606 RepID=A0A0R0ERX9_SOYBN
Glyma.12G096900	533.621	-1.1621	0.107119	2.98649e-28	1.04925e-26	UniRef100_K7LTY3 Uncharacterized protein n=1 Tax=Glycine max TaxID=3847 RepID=K7LTY3_SOYBN
Glyma.17G076500	80.3333	-1.16413	0.246876	3.10716e-07	2.5355e-06	UniRef100_K7MKF8 Uncharacterized protein n=2 Tax=Soja TaxID=1462606 RepID=K7MKF8_SOYBN
Glyma.06G063800	143.168	-1.16421	0.186241	5.55303e-11	6.95178e-10	UniRef100_A0A445K5H4 DeSI-like protein n=2 Tax=Soja TaxID=1462606 RepID=A0A445K5H4_GLYSO
Glyma.18G222200	457.003	-1.16452	0.102709	1.24449e-30	4.91228e-29	UniRef100_I1N3G2 Uncharacterized protein n=3 Tax=Soja TaxID=1462606 RepID=I1N3G2_SOYBN
Glyma.01G180366	41.5983	-1.16503	0.329987	5.14499e-05	0.000292172	UniRef100_UPI0002336ED2 STS14 protein n=1 Tax=Glycine max TaxID=3847 RepID=UPI0002336ED2
Glyma.09G119900	82.9215	-1.16593	0.261118	1.04893e-06	7.95051e-06	UniRef100_A0A0B2P638 Uncharacterized protein n=2 Tax=Soja TaxID=1462606 RepID=A0A0B2P638_GLYSO
Glyma.14G138200	130.824	-1.1671	0.186647	5.53018e-11	6.92557e-10	UniRef100_I1M9V7 Uncharacterized protein n=5 Tax=Soja TaxID=1462606 RepID=I1M9V7_SOYBN
Glyma.02G020200	18.2774	-1.16751	0.51171	0.00225919	0.00883446	UniRef100_I1JBP2 Uncharacterized protein n=2 Tax=Glycine max TaxID=3847 RepID=I1JBP2_SOYBN
Glyma.11G055200	68.401	-1.16778	0.244312	2.37262e-07	1.97374e-06	UniRef100_I1LHE0 Uncharacterized protein n=2 Tax=Soja TaxID=1462606 RepID=I1LHE0_SOYBN
Glyma.04G153700	117.478	-1.16853	0.197442	4.50866e-10	5.15804e-09	UniRef100_A0A0B2PTY6 Cellulose synthase n=2 Tax=Soja TaxID=1462606 RepID=A0A0B2PTY6_GLYSO
Glyma.20G200500	290.348	-1.16921	0.135738	1.01671e-18	2.19884e-17	UniRef100_A0A445F7R2 DELLA protein GAI1 n=2 Tax=Soja TaxID=1462606 RepID=A0A445F7R2_GLYSO
Glyma.02G296000	60.0925	-1.1693	0.266895	1.55965e-06	1.14889e-05	UniRef100_C6TIL0 MBOAT_2 domain-containing protein n=2 Tax=Soja TaxID=1462606 RepID=C6TIL0_SOYBN
Glyma.17G139700	496.434	-1.16938	0.118809	1.11292e-23	3.15754e-22	UniRef100_I1MUY9 AAI domain-containing protein n=1 Tax=Glycine max TaxID=3847 RepID=I1MUY9_SOYBN
Glyma.08G349500	96.7202	-1.16947	0.22716	3.48353e-08	3.22189e-07	UniRef100_A0A0B2PTV0 RPM1-interacting protein 4 n=2 Tax=Soja TaxID=1462606 RepID=A0A0B2PTV0_GLYSO
Glyma.05G147400	171.46	-1.16958	0.160313	4.31729e-14	6.90861e-13	UniRef100_A0A0R0K284 MYND-type domain-containing protein n=2 Tax=Soja TaxID=1462606 RepID=A0A0R0K284_SOYBN
Glyma.06G242100	282.115	-1.17179	0.141198	1.49023e-17	2.99847e-16	UniRef100_I1KDV9 Uncharacterized protein n=1 Tax=Glycine max TaxID=3847 RepID=I1KDV9_SOYBN
Glyma.02G110300	23.0349	-1.17319	0.479112	0.00144412	0.0059513	UniRef100_K7K7P2 Uncharacterized protein n=1 Tax=Glycine max TaxID=3847 RepID=K7K7P2_SOYBN
Glyma.14G048000	86.1174	-1.17334	0.239889	1.32964e-07	1.1475e-06	UniRef100_A0A0R0GGN1 Uncharacterized protein n=1 Tax=Glycine max TaxID=3847 RepID=A0A0R0GGN1_SOYBN
Glyma.16G010200	338.881	-1.17479	0.138018	2.44607e-18	5.16334e-17	UniRef100_C6TK03 TPR_REGION domain-containing protein n=2 Tax=Soja TaxID=1462606 RepID=C6TK03_SOYBN
Glyma.17G095200	57.4064	-1.17662	0.303251	1.28648e-05	8.17736e-05	UniRef100_C6TMH5 Uncharacterized protein n=3 Tax=Soja TaxID=1462606 RepID=C6TMH5_SOYBN
Glyma.19G173000	151.164	-1.17685	0.197589	3.53196e-10	4.08597e-09	UniRef100_I1N9Z8 Uncharacterized protein n=2 Tax=Soja TaxID=1462606 RepID=I1N9Z8_SOYBN
Glyma.10G215800	129.303	-1.17765	0.189658	7.25625e-11	8.96593e-10	UniRef100_K7LKR1 Uncharacterized protein n=2 Tax=Soja TaxID=1462606 RepID=K7LKR1_SOYBN
Glyma.10G105900	113.899	-1.17773	0.201673	7.03067e-10	7.85658e-09	UniRef100_A0A0B2PCJ5 UDP-N-acetylglucosamine--dolichyl-phosphate N-acetylglucosaminephosphotransferase n=2 Tax=Soja TaxID=1462606 RepID=A0A0B2PCJ5_GLYSO
Glyma.01G184600	25.6142	-1.18009	0.434691	0.000706073	0.00315531	UniRef100_K7K4K4 Uncharacterized protein n=1 Tax=Glycine max TaxID=3847 RepID=K7K4K4_SOYBN
Glyma.05G232000	24.2824	-1.18015	0.428223	0.000637489	0.00288235	UniRef100_A0A0R0K5L0 LRRNT_2 domain-containing protein n=2 Tax=Glycine max TaxID=3847 RepID=A0A0R0K5L0_SOYBN
Glyma.06G153300	27.9869	-1.18055	0.394819	0.00031519	0.00151965	UniRef100_I1KBJ2 DRMBL domain-containing protein n=2 Tax=Soja TaxID=1462606 RepID=I1KBJ2_SOYBN
Glyma.07G214300	250.659	-1.18076	0.139896	4.51954e-18	9.39737e-17	UniRef100_A0A445JZP2 RING-type E3 ubiquitin transferase n=1 Tax=Glycine soja TaxID=3848 RepID=A0A445JZP2_GLYSO
Glyma.06G228800	106.229	-1.18114	0.206496	1.47454e-09	1.59115e-08	UniRef100_I1KDK5 Uncharacterized protein n=1 Tax=Glycine max TaxID=3847 RepID=I1KDK5_SOYBN
Glyma.15G043200	264.42	-1.18175	0.135522	3.87374e-19	8.62565e-18	UniRef100_A0A368RZS7 Histone H4 n=1 Tax=Setaria italica TaxID=4555 RepID=A0A368RZS7_SETIT
Glyma.09G250200	945.096	-1.18176	0.0832933	1.58376e-46	1.02879e-44	UniRef100_I1L6A2 Nudix hydrolase domain-containing protein n=3 Tax=Soja TaxID=1462606 RepID=I1L6A2_SOYBN
Glyma.12G192900	474.903	-1.18242	0.104579	1.69229e-30	6.60763e-29	UniRef100_C6T0Z3 Uncharacterized protein n=2 Tax=Glycine max TaxID=3847 RepID=C6T0Z3_SOYBN
Glyma.14G144000	127.547	-1.18248	0.195033	1.81822e-10	2.16371e-09	UniRef100_A0A0R0GQF7 Uncharacterized protein n=2 Tax=Soja TaxID=1462606 RepID=A0A0R0GQF7_SOYBN
Glyma.04G178400	49.2822	-1.1838	0.293497	6.93931e-06	4.62668e-05	UniRef100_I1JX24 NTP_transferase domain-containing protein n=2 Tax=Soja TaxID=1462606 RepID=I1JX24_SOYBN
Glyma.06G136600	253.417	-1.18481	0.136752	6.63043e-19	1.44871e-17	UniRef100_K7KUW6 Uncharacterized protein n=2 Tax=Glycine max TaxID=3847 RepID=K7KUW6_SOYBN
Glyma.12G003900	219.696	-1.18503	0.170633	5.3289e-13	7.91381e-12	UniRef100_I1LNR2 Uncharacterized protein n=2 Tax=Soja TaxID=1462606 RepID=I1LNR2_SOYBN
Glyma.14G056800	1195.19	-1.18641	0.080204	2.44265e-50	1.74695e-48	UniRef100_Q948P5 Ferritin-4, chloroplastic n=4 Tax=Soja TaxID=1462606 RepID=FRI4_SOYBN
Glyma.06G143000	3886.76	-1.18752	0.0691401	5.47198e-67	6.21483e-65	UniRef100_Q53B72 Chalcone-flavonone isomerase family protein n=2 Tax=Soja TaxID=1462606 RepID=Q53B72_SOYBN
Glyma.18G177000	101.426	-1.18881	0.209614	1.91106e-09	2.04327e-08	UniRef100_A0A0R0F139 PKS_ER domain-containing protein n=1 Tax=Glycine max TaxID=3847 RepID=A0A0R0F139_SOYBN
Glyma.08G328800	238.749	-1.18965	0.147547	1.04252e-16	2.00068e-15	UniRef100_I1KYI9 Uncharacterized protein n=1 Tax=Glycine max TaxID=3847 RepID=I1KYI9_SOYBN
Glyma.08G193500	396.827	-1.1904	0.116407	2.19552e-25	6.72565e-24	UniRef100_I1KUU7 Beta-galactosidase n=2 Tax=Soja TaxID=1462606 RepID=I1KUU7_SOYBN
Glyma.19G258100	228.357	-1.19068	0.148401	1.43167e-16	2.72288e-15	UniRef100_I1NCP2 AAA domain-containing protein n=2 Tax=Soja TaxID=1462606 RepID=I1NCP2_SOYBN
Glyma.08G194000	55.4311	-1.19154	0.303979	1.07295e-05	6.92738e-05	UniRef100_C6SXM6 Uncharacterized protein n=2 Tax=Soja TaxID=1462606 RepID=C6SXM6_SOYBN
Glyma.10G261200	267.562	-1.19183	0.145604	3.8992e-17	7.64951e-16	UniRef100_I1LEI5 Uncharacterized protein n=1 Tax=Glycine max TaxID=3847 RepID=I1LEI5_SOYBN
Glyma.19G163700	432.62	-1.19195	0.108723	8.39569e-29	3.00522e-27	UniRef100_I1N9Q1 AP2/ERF domain-containing protein n=2 Tax=Soja TaxID=1462606 RepID=I1N9Q1_SOYBN
Glyma.20G159900	24.3022	-1.19241	0.435927	0.000672757	0.00302101	UniRef100_I1NGU7 Pectin acetylesterase n=1 Tax=Glycine max TaxID=3847 RepID=I1NGU7_SOYBN
Glyma.10G213000	291.59	-1.19243	0.127407	1.12572e-21	2.86321e-20	UniRef100_UPI0003DEACFD uncharacterized protein LOC102662800 isoform X2 n=1 Tax=Glycine max TaxID=3847 RepID=UPI0003DEACFD
Glyma.14G059100	16.2349	-1.19273	0.536713	0.00250723	0.00966626	UniRef100_UPI0007193B58 putative serine/threonine-protein kinase-like protein CCR3 n=1 Tax=Glycine max TaxID=3847 RepID=UPI0007193B58
Glyma.07G097700	76.7232	-1.19373	0.24054	9.24046e-08	8.11027e-07	UniRef100_I1KJ18 RING-type domain-containing protein n=1 Tax=Glycine max TaxID=3847 RepID=I1KJ18_SOYBN
Glyma.16G105400	27.0802	-1.19563	0.402793	0.000331587	0.00159064	UniRef100_I1MMJ3 TPR_REGION domain-containing protein n=1 Tax=Glycine max TaxID=3847 RepID=I1MMJ3_SOYBN
Glyma.20G215500	42.7516	-1.19642	0.323367	2.60118e-05	0.000156839	UniRef100_K7N4W7 Uncharacterized protein n=1 Tax=Glycine max TaxID=3847 RepID=K7N4W7_SOYBN
Glyma.03G157432	54.508	-1.19657	0.278816	2.22059e-06	1.59986e-05	UniRef100_A0A445LC68 Protein indeterminate-domain 12 n=1 Tax=Glycine soja TaxID=3848 RepID=A0A445LC68_GLYSO
Glyma.06G131400	71.3223	-1.19795	0.263523	6.77056e-07	5.27692e-06	UniRef100_A0A445K8Z6 WD repeat-containing protein 44 isoform A n=2 Tax=Soja TaxID=1462606 RepID=A0A445K8Z6_GLYSO
Glyma.05G239400	147.558	-1.20015	0.171579	3.596e-13	5.38907e-12	UniRef100_I1K5J7 Uncharacterized protein n=2 Tax=Soja TaxID=1462606 RepID=I1K5J7_SOYBN
Glyma.12G016900	38.5269	-1.20016	0.359448	9.84592e-05	0.000527057	UniRef100_I1LP66 Uncharacterized protein n=2 Tax=Glycine max TaxID=3847 RepID=I1LP66_SOYBN
Glyma.10G246300	47.7149	-1.20063	0.314135	1.6001e-05	9.99843e-05	UniRef100_P11827 Beta-conglycinin alpha' subunit n=4 Tax=Glycine max TaxID=3847 RepID=GLCAP_SOYBN
Glyma.03G221700	243.034	-1.20148	0.142751	5.31069e-18	1.09855e-16	UniRef100_C5NU12 MYB12 transcription factor a n=2 Tax=Soja TaxID=1462606 RepID=C5NU12_SOYBN
Glyma.15G130900	24.4648	-1.20309	0.485481	0.00129395	0.00539837	UniRef100_I1MG48 Protein kinase domain-containing protein n=2 Tax=Soja TaxID=1462606 RepID=I1MG48_SOYBN
Glyma.03G007700	108.883	-1.20496	0.196807	1.24412e-10	1.50331e-09	UniRef100_I1JK63 Peroxidase n=2 Tax=Soja TaxID=1462606 RepID=I1JK63_SOYBN
Glyma.05G018700	87.4352	-1.2052	0.217327	3.88256e-09	4.0122e-08	UniRef100_K7KNE5 Uncharacterized protein n=2 Tax=Soja TaxID=1462606 RepID=K7KNE5_SOYBN
Glyma.15G071000	96.864	-1.20641	0.213837	2.21267e-09	2.34906e-08	UniRef100_A0A445GQM4 Polyphenol oxidase, chloroplastic n=2 Tax=Glycine soja TaxID=3848 RepID=A0A445GQM4_GLYSO
Glyma.19G137800	136.48	-1.2068	0.21845	4.15073e-09	4.27343e-08	UniRef100_A0A0B2Q4L1 Heat stress transcription factor B-3 n=3 Tax=Soja TaxID=1462606 RepID=A0A0B2Q4L1_GLYSO
Glyma.15G079100	422.934	-1.20685	0.115102	1.38614e-26	4.47393e-25	UniRef100_A0A0R0G4Q5 AP2/ERF domain-containing protein n=2 Tax=Soja TaxID=1462606 RepID=A0A0R0G4Q5_SOYBN
Glyma.14G089093	32.022	-1.20769	0.40998	0.000347168	0.00165987	UniRef100_K7M5R8 Uncharacterized protein n=3 Tax=Soja TaxID=1462606 RepID=K7M5R8_SOYBN
Glyma.16G141100	115.736	-1.20863	0.193355	5.48076e-11	6.87082e-10	UniRef100_I1MNH4 C2H2-type domain-containing protein n=2 Tax=Soja TaxID=1462606 RepID=I1MNH4_SOYBN
Glyma.12G111400	31.3572	-1.20936	0.418327	0.000410909	0.00193769	UniRef100_K7LU68 ANK_REP_REGION domain-containing protein n=2 Tax=Soja TaxID=1462606 RepID=K7LU68_SOYBN
Glyma.10G118100	32.0122	-1.21009	0.375302	0.000144597	0.000750348	UniRef100_K7LIU4 Protein kinase domain-containing protein n=2 Tax=Glycine max TaxID=3847 RepID=K7LIU4_SOYBN
Glyma.03G159600	41.7844	-1.21179	0.318515	1.70676e-05	0.000105924	UniRef100_I1JP02 PRA1 family protein n=2 Tax=Soja TaxID=1462606 RepID=I1JP02_SOYBN
Glyma.17G055600	50.9847	-1.21228	0.329505	2.71629e-05	0.000163235	UniRef100_A0A0R0FHE5 Uncharacterized protein n=2 Tax=Soja TaxID=1462606 RepID=A0A0R0FHE5_SOYBN
Glyma.11G051800	67.5466	-1.213	0.277028	1.44987e-06	1.07305e-05	UniRef100_A0A0R0HCC8 Uncharacterized protein n=3 Tax=Soja TaxID=1462606 RepID=A0A0R0HCC8_SOYBN
Glyma.18G201800	119.483	-1.21478	0.18974	2.00738e-11	2.61263e-10	UniRef100_K7MTI9 HTH myb-type domain-containing protein n=3 Tax=Glycine max TaxID=3847 RepID=K7MTI9_SOYBN
Glyma.07G232500	297.372	-1.21715	0.126731	1.03507e-22	2.79608e-21	UniRef100_I1KMJ2 CRT-like domain-containing protein n=2 Tax=Soja TaxID=1462606 RepID=I1KMJ2_SOYBN
Glyma.10G198700	530.24	-1.21802	0.113434	9.239e-28	3.16289e-26	UniRef100_A0A445IQ95 C2 NT-type domain-containing protein n=1 Tax=Glycine soja TaxID=3848 RepID=A0A445IQ95_GLYSO
Glyma.02G308300	17.2266	-1.21843	0.538593	0.00215745	0.00849085	UniRef100_A0A0B2SI86 Uncharacterized protein n=2 Tax=Soja TaxID=1462606 RepID=A0A0B2SI86_GLYSO
Glyma.06G107800	142.655	-1.21869	0.187189	1.02327e-11	1.3671e-10	UniRef100_K7KUF0 Serine hydroxymethyltransferase n=3 Tax=Soja TaxID=1462606 RepID=K7KUF0_SOYBN
Glyma.08G021700	26.7124	-1.21873	0.406013	0.000292803	0.00142139	UniRef100_A0A0R4J3U3 Uncharacterized protein n=3 Tax=Soja TaxID=1462606 RepID=A0A0R4J3U3_SOYBN
Glyma.15G235900	258.769	-1.21887	0.133884	1.19115e-20	2.87189e-19	UniRef100_A0A0R0G598 DNA-directed RNA polymerase subunit n=1 Tax=Glycine max TaxID=3847 RepID=A0A0R0G598_SOYBN
Glyma.05G220100	29.7274	-1.21966	0.388496	0.000183944	0.000931375	UniRef100_K7KRU5 Methyltransferase n=2 Tax=Soja TaxID=1462606 RepID=K7KRU5_SOYBN
Glyma.05G230200	16.4389	-1.22068	0.546344	0.00236385	0.00917817	UniRef100_A0A0B2S8W0 Uncharacterized protein n=2 Tax=Soja TaxID=1462606 RepID=A0A0B2S8W0_GLYSO
Glyma.08G006900	313.583	-1.22116	0.125958	4.28347e-23	1.18549e-21	UniRef100_A0A445J806 Calcium-binding mitochondrial carrier protein SCaMC-2 isoform A n=2 Tax=Soja TaxID=1462606 RepID=A0A445J806_GLYSO
Glyma.06G202900	34.0021	-1.2214	0.363434	8.74385e-05	0.00047304	UniRef100_K7KW55 Uncharacterized protein n=1 Tax=Glycine max TaxID=3847 RepID=K7KW55_SOYBN
Glyma.16G218700	36.5969	-1.22231	0.347994	5.13255e-05	0.000291604	UniRef100_A0A0R0G314 DNA polymerase epsilon subunit n=2 Tax=Soja TaxID=1462606 RepID=A0A0R0G314_SOYBN
Glyma.09G190900	43.7315	-1.22242	0.311114	1.01469e-05	6.583e-05	UniRef100_A0A0B2SL98 Polyol transporter 5 n=2 Tax=Soja TaxID=1462606 RepID=A0A0B2SL98_GLYSO
Glyma.14G176300	84.347	-1.22247	0.227285	9.75514e-09	9.61065e-08	UniRef100_I1MAV8 Uncharacterized protein n=2 Tax=Soja TaxID=1462606 RepID=I1MAV8_SOYBN
Glyma.16G014600	48.7604	-1.22438	0.305542	7.30573e-06	4.85306e-05	UniRef100_K7MEL9 RING-type domain-containing protein n=2 Tax=Soja TaxID=1462606 RepID=K7MEL9_SOYBN
Glyma.03G258800	47.6113	-1.22617	0.30587	7.34204e-06	4.8736e-05	UniRef100_K7KH42 Dof-type domain-containing protein n=3 Tax=Soja TaxID=1462606 RepID=K7KH42_SOYBN
Glyma.09G067900	31.8814	-1.22653	0.384486	0.000157609	0.000810415	UniRef100_K7LC91 RING-type domain-containing protein n=3 Tax=Soja TaxID=1462606 RepID=K7LC91_SOYBN
Glyma.14G092400	23.5635	-1.22703	0.451298	0.000678755	0.00304378	UniRef100_I1M8Z3 Uncharacterized protein n=2 Tax=Soja TaxID=1462606 RepID=I1M8Z3_SOYBN
Glyma.13G312800	21.7721	-1.22736	0.485969	0.00111927	0.00474859	UniRef100_I1M492 RING-type E3 ubiquitin transferase n=1 Tax=Glycine max TaxID=3847 RepID=I1M492_SOYBN
Glyma.02G029500	15.3729	-1.22788	0.548436	0.00231505	0.00901775	UniRef100_K7K648 Uncharacterized protein n=1 Tax=Glycine max TaxID=3847 RepID=K7K648_SOYBN
Glyma.02G140100	318.436	-1.22843	0.142715	1.02058e-18	2.20588e-17	UniRef100_I1JF25 PMR5N domain-containing protein n=1 Tax=Glycine max TaxID=3847 RepID=I1JF25_SOYBN
Glyma.18G005800	106.796	-1.22846	0.20121	1.36491e-10	1.64486e-09	UniRef100_A0A0B2QRP0 Non-specific lipid transfer protein GPI-anchored 1 n=2 Tax=Soja TaxID=1462606 RepID=A0A0B2QRP0_GLYSO
Glyma.10G004700	120.49	-1.23001	0.198621	7.95208e-11	9.77886e-10	UniRef100_K7LGQ6 Uncharacterized protein n=1 Tax=Glycine max TaxID=3847 RepID=K7LGQ6_SOYBN
Glyma.06G017800	271.227	-1.23067	0.130936	7.6835e-22	1.97232e-20	UniRef100_K7KSI9 Uncharacterized protein n=1 Tax=Glycine max TaxID=3847 RepID=K7KSI9_SOYBN
Glyma.16G130500	335.023	-1.23127	0.317403	1.16876e-05	7.49639e-05	UniRef100_A0A0R0FQ41 Kinesin-like protein n=1 Tax=Glycine max TaxID=3847 RepID=A0A0R0FQ41_SOYBN
Glyma.13G179600	1794.97	-1.23255	0.0724409	8.69795e-66	9.43375e-64	UniRef100_I1M0A8 UBIQUITIN_CONJUGAT_2 domain-containing protein n=1 Tax=Glycine max TaxID=3847 RepID=I1M0A8_SOYBN
Glyma.14G063900	105.613	-1.2333	0.212603	8.30874e-10	9.22209e-09	UniRef100_I1M803 Uncharacterized protein n=1 Tax=Glycine max TaxID=3847 RepID=I1M803_SOYBN
Glyma.07G230200	54.8257	-1.23342	0.278567	1.1645e-06	8.7548e-06	UniRef100_A0A0R0JCS9 ZF-HD dimerization-type domain-containing protein n=1 Tax=Glycine max TaxID=3847 RepID=A0A0R0JCS9_SOYBN
Glyma.12G005000	15.6121	-1.23358	0.56571	0.00256761	0.00986956	UniRef100_A0A0B2RDD5 Agamous-like MADS-box protein AGL12 n=2 Tax=Soja TaxID=1462606 RepID=A0A0B2RDD5_GLYSO
Glyma.11G113300	65.9429	-1.23384	0.258489	2.21185e-07	1.84963e-06	UniRef100_I1LJ93 DNA helicase n=2 Tax=Soja TaxID=1462606 RepID=I1LJ93_SOYBN
Glyma.13G244100	53.3731	-1.23389	0.293453	3.11245e-06	2.20243e-05	UniRef100_I1M2A2 Uncharacterized protein n=1 Tax=Glycine max TaxID=3847 RepID=I1M2A2_SOYBN
Glyma.15G155300	100.484	-1.23474	0.203778	1.80766e-10	2.15257e-09	UniRef100_I1MGS7 Glycosyltransferase family 92 protein n=2 Tax=Soja TaxID=1462606 RepID=I1MGS7_SOYBN
Glyma.12G217500	1077.93	-1.23483	0.101433	6.42921e-35	2.98847e-33	UniRef100_C6T1U2 EF-hand domain-containing protein n=2 Tax=Soja TaxID=1462606 RepID=C6T1U2_SOYBN
Glyma.11G225700	15.939	-1.23556	0.547862	0.00222155	0.00870615	UniRef100_I1LML7 Uncharacterized protein n=2 Tax=Soja TaxID=1462606 RepID=I1LML7_SOYBN
Glyma.11G074700	168.473	-1.23595	0.183567	2.06061e-12	2.91626e-11	UniRef100_I1LHY9 Uncharacterized protein n=2 Tax=Soja TaxID=1462606 RepID=I1LHY9_SOYBN
Glyma.09G127000	596.765	-1.23596	0.100356	1.05517e-35	5.09487e-34	UniRef100_I1L2Y3 AAA domain-containing protein n=4 Tax=Soja TaxID=1462606 RepID=I1L2Y3_SOYBN
Glyma.10G180800	475.172	-1.23619	0.116014	2.24302e-27	7.55701e-26	UniRef100_Q9XIU8 GmMYB29A2 protein n=1 Tax=Glycine max TaxID=3847 RepID=Q9XIU8_SOYBN
Glyma.04G035000	146.996	-1.23653	0.178336	5.3274e-13	7.91381e-12	UniRef100_I1JTE7 Uncharacterized protein n=1 Tax=Glycine max TaxID=3847 RepID=I1JTE7_SOYBN
Glyma.09G010200	66.7119	-1.23665	0.249649	9.25357e-08	8.11981e-07	UniRef100_I1KZZ3 MBOAT_2 domain-containing protein n=1 Tax=Glycine max TaxID=3847 RepID=I1KZZ3_SOYBN
Glyma.13G175300	98.3521	-1.23717	0.22761	6.92191e-09	6.93093e-08	UniRef100_I1M070 Uncharacterized protein n=1 Tax=Glycine max TaxID=3847 RepID=I1M070_SOYBN
Glyma.08G237400	224.864	-1.23733	0.154004	1.23001e-16	2.348e-15	UniRef100_C6TJ97 Uncharacterized protein n=2 Tax=Soja TaxID=1462606 RepID=C6TJ97_SOYBN
Glyma.12G097100	64.2475	-1.23778	0.258466	2.07762e-07	1.74465e-06	UniRef100_I1LRN9 WRKY domain-containing protein n=1 Tax=Glycine max TaxID=3847 RepID=I1LRN9_SOYBN
Glyma.15G002300	232.678	-1.23834	0.16247	3.4023e-15	5.94202e-14	UniRef100_A0A0B2QQH3 Aspartic proteinase nepenthesin-1 n=2 Tax=Soja TaxID=1462606 RepID=A0A0B2QQH3_GLYSO
Glyma.07G210700	42.8082	-1.23855	0.327306	1.817e-05	0.000112409	UniRef100_I1KLX9 Uncharacterized protein n=1 Tax=Glycine max TaxID=3847 RepID=I1KLX9_SOYBN
Glyma.19G219100	19.4856	-1.24019	0.507331	0.00137474	0.00569659	UniRef100_I1NBF3 Hexosyltransferase n=2 Tax=Soja TaxID=1462606 RepID=I1NBF3_SOYBN
Glyma.02G252700	86.9653	-1.2406	0.221413	2.63886e-09	2.77784e-08	UniRef100_I1JI39 Uncharacterized protein n=1 Tax=Glycine max TaxID=3847 RepID=I1JI39_SOYBN
Glyma.03G222300	136.38	-1.24084	0.19398	2.05295e-11	2.66906e-10	UniRef100_A0A445LFG8 Putative boron transporter 2 n=1 Tax=Glycine soja TaxID=3848 RepID=A0A445LFG8_GLYSO
Glyma.17G065400	29.3017	-1.2424	0.439272	0.00046615	0.00217547	UniRef100_I1MST0 Xyloglucan endotransglucosylase/hydrolase n=2 Tax=Soja TaxID=1462606 RepID=I1MST0_SOYBN
Glyma.13G324000	72.4785	-1.24295	0.247459	6.38907e-08	5.73017e-07	UniRef100_I1M4I3 Protein kinase domain-containing protein n=1 Tax=Glycine max TaxID=3847 RepID=I1M4I3_SOYBN
Glyma.16G064100	31.7166	-1.24413	0.381535	0.000119083	0.000628053	UniRef100_I1MLP8 Protein kinase domain-containing protein n=1 Tax=Glycine max TaxID=3847 RepID=I1MLP8_SOYBN
Glyma.U031413	3308.25	-1.2445	0.0645462	1.04155e-83	1.6499e-81	UniRef100_A0A0R4J3J1 Peroxidase n=1 Tax=Glycine max TaxID=3847 RepID=A0A0R4J3J1_SOYBN
Glyma.05G188600	54.4817	-1.24471	0.278206	9.30886e-07	7.12305e-06	UniRef100_A0A452Z7H5 Histone domain-containing protein n=2 Tax=Aegilops tauschii subsp. strangulata TaxID=200361 RepID=A0A452Z7H5_AEGTS
Glyma.06G192100	479.593	-1.24541	0.121738	1.94704e-25	5.96953e-24	UniRef100_I1KCR2 MFS domain-containing protein n=1 Tax=Glycine max TaxID=3847 RepID=I1KCR2_SOYBN
Glyma.12G185500	607.398	-1.24545	0.112527	2.36424e-29	8.74888e-28	UniRef100_K7LVS1 Uncharacterized protein n=3 Tax=Soja TaxID=1462606 RepID=K7LVS1_SOYBN
Glyma.13G179000	98.0398	-1.24583	0.212461	5.71877e-10	6.45453e-09	UniRef100_I1M0A2 Protein kinase domain-containing protein n=1 Tax=Glycine max TaxID=3847 RepID=I1M0A2_SOYBN
Glyma.17G113900	1003.47	-1.24712	0.100008	1.43264e-36	7.19649e-35	UniRef100_I1MU84 F-box domain-containing protein n=2 Tax=Soja TaxID=1462606 RepID=I1MU84_SOYBN
Glyma.12G055900	107.747	-1.24721	0.208103	2.66725e-10	3.12162e-09	UniRef100_A0A0R0H1W3 Uncharacterized protein n=2 Tax=Glycine max TaxID=3847 RepID=A0A0R0H1W3_SOYBN
Glyma.13G170700	44.8694	-1.24748	0.316422	9.33355e-06	6.09364e-05	UniRef100_I1M028 Potassium transporter n=3 Tax=Soja TaxID=1462606 RepID=I1M028_SOYBN
Glyma.12G019400	2210	-1.2475	0.0833763	1.82834e-51	1.34489e-49	UniRef100_I1LP98 Uncharacterized protein n=2 Tax=Soja TaxID=1462606 RepID=I1LP98_SOYBN
Glyma.08G148100	69.4426	-1.24784	0.250401	7.70501e-08	6.84075e-07	UniRef100_I1KTG8 Uncharacterized protein n=2 Tax=Glycine max TaxID=3847 RepID=I1KTG8_SOYBN
Glyma.13G145900	117.835	-1.24846	0.200339	5.92394e-11	7.39305e-10	UniRef100_A0A0R0GUZ0 Pectate lyase n=2 Tax=Soja TaxID=1462606 RepID=A0A0R0GUZ0_SOYBN
Glyma.12G078700	27.7885	-1.24936	0.50554	0.0012217	0.0051397	UniRef100_A0A0R0HBE2 Uncharacterized protein n=1 Tax=Glycine max TaxID=3847 RepID=A0A0R0HBE2_SOYBN
Glyma.02G071700	146.543	-1.24939	0.181299	6.99626e-13	1.02926e-11	UniRef100_K7K6W3 Uncharacterized protein n=1 Tax=Glycine max TaxID=3847 RepID=K7K6W3_SOYBN
Glyma.04G212400	29.0828	-1.25018	0.407788	0.000225921	0.00112562	UniRef100_I1JY15 Uncharacterized protein n=1 Tax=Glycine max TaxID=3847 RepID=I1JY15_SOYBN
Glyma.13G242800	65.8318	-1.25028	0.273438	5.90139e-07	4.63051e-06	UniRef100_I1M287 Uncharacterized protein n=2 Tax=Soja TaxID=1462606 RepID=I1M287_SOYBN
Glyma.14G182300	37.8651	-1.25082	0.354035	4.54769e-05	0.000261252	UniRef100_I1MB08 PHD_Oberon domain-containing protein n=2 Tax=Glycine max TaxID=3847 RepID=I1MB08_SOYBN
Glyma.18G256500	274.621	-1.25202	0.136426	6.08724e-21	1.49053e-19	UniRef100_K7MUR0 WRKY domain-containing protein n=1 Tax=Glycine max TaxID=3847 RepID=K7MUR0_SOYBN
Glyma.14G178400	19.5046	-1.25415	0.504916	0.00122985	0.00516914	UniRef100_I1MAX3 RING-type domain-containing protein n=2 Tax=Soja TaxID=1462606 RepID=I1MAX3_SOYBN
Glyma.17G160800	14.4511	-1.25448	0.570094	0.00244366	0.00944943	UniRef100_I1MVL1 GRAS domain-containing protein n=2 Tax=Soja TaxID=1462606 RepID=I1MVL1_SOYBN
Glyma.18G123500	40.6712	-1.25477	0.32965	1.58739e-05	9.92589e-05	UniRef100_A0A0B2RM11 Homeobox-leucine zipper protein ATHB-13 n=2 Tax=Soja TaxID=1462606 RepID=A0A0B2RM11_GLYSO
Glyma.08G011300	188.507	-1.25543	0.152399	2.27917e-17	4.53535e-16	UniRef100_I1KP65 WRKY domain-containing protein n=2 Tax=Soja TaxID=1462606 RepID=I1KP65_SOYBN
Glyma.07G257700	3833.93	-1.25625	0.0594588	5.85813e-100	1.32236e-97	UniRef100_A0A445K1L5 Stem-specific protein TSJT1 isoform A n=1 Tax=Glycine soja TaxID=3848 RepID=A0A445K1L5_GLYSO
Glyma.04G091800	5295.78	-1.2569	0.0816808	2.59398e-54	2.07272e-52	UniRef100_A0A0R0K666 Peptidase A1 domain-containing protein n=2 Tax=Soja TaxID=1462606 RepID=A0A0R0K666_SOYBN
Glyma.19G038400	465.487	-1.25701	0.110532	7.56895e-31	3.02064e-29	UniRef100_A0A0R0EHR6 6-phosphogluconate dehydrogenase, decarboxylating n=3 Tax=Soja TaxID=1462606 RepID=A0A0R0EHR6_SOYBN
Glyma.11G152400	532.976	-1.25717	0.0978033	1.08007e-38	5.76202e-37	UniRef100_A0A0B2QFW7 NADPH:quinone oxidoreductase n=2 Tax=Soja TaxID=1462606 RepID=A0A0B2QFW7_GLYSO
Glyma.06G192600	465.323	-1.25836	0.110718	8.29876e-31	3.30459e-29	UniRef100_A0A0B2RG99 Microtubule-associated protein RP/EB family member 1 n=2 Tax=Soja TaxID=1462606 RepID=A0A0B2RG99_GLYSO
Glyma.03G130800	1378.67	-1.25946	0.0808158	1.19953e-55	9.93659e-54	UniRef100_I1JN81 Uncharacterized protein n=1 Tax=Glycine max TaxID=3847 RepID=I1JN81_SOYBN
Glyma.06G260100	647.035	-1.26021	0.0984344	2.03607e-38	1.07825e-36	UniRef100_I1KE99 TIR domain-containing protein n=1 Tax=Glycine max TaxID=3847 RepID=I1KE99_SOYBN
Glyma.09G027000	893.67	-1.26056	0.0939938	6.75809e-42	3.87431e-40	UniRef100_I1L0H7 FAD-binding PCMH-type domain-containing protein n=1 Tax=Glycine max TaxID=3847 RepID=I1L0H7_SOYBN
Glyma.19G205600	52.7823	-1.26099	0.285539	1.19015e-06	8.92908e-06	UniRef100_K7MZF2 Uncharacterized protein n=2 Tax=Soja TaxID=1462606 RepID=K7MZF2_SOYBN
Glyma.02G260100	440.218	-1.26181	0.111395	1.27037e-30	4.99805e-29	UniRef100_I1JIB7 Aa_trans domain-containing protein n=2 Tax=Soja TaxID=1462606 RepID=I1JIB7_SOYBN
Glyma.09G087200	120.846	-1.26194	0.190167	4.09014e-12	5.65342e-11	UniRef100_K7LCL7 MFS domain-containing protein n=2 Tax=Soja TaxID=1462606 RepID=K7LCL7_SOYBN
Glyma.05G169600	17.3382	-1.26264	0.519348	0.00138917	0.00575177	UniRef100_A0A445KPY0 F-box protein isoform A n=2 Tax=Soja TaxID=1462606 RepID=A0A445KPY0_GLYSO
Glyma.08G214000	145.859	-1.26363	0.17427	5.28993e-14	8.41659e-13	UniRef100_A0A445JI39 Protein TSS isoform A n=1 Tax=Glycine soja TaxID=3848 RepID=A0A445JI39_GLYSO
Glyma.18G059600	118.489	-1.26484	0.201453	4.23611e-11	5.36262e-10	UniRef100_K7MQ76 Protein kinase domain-containing protein n=1 Tax=Glycine max TaxID=3847 RepID=K7MQ76_SOYBN
Glyma.09G068100	34.4939	-1.26492	0.380354	9.17781e-05	0.000494665	UniRef100_I1L1N4 Uncharacterized protein n=2 Tax=Soja TaxID=1462606 RepID=I1L1N4_SOYBN
Glyma.06G102000	2648.97	-1.26543	0.0654037	2.81797e-84	4.48355e-82	UniRef100_I1K9W8 Uncharacterized protein n=1 Tax=Glycine max TaxID=3847 RepID=I1K9W8_SOYBN
Glyma.08G078900	202.841	-1.26554	0.190981	4.35136e-12	5.9984e-11	UniRef100_I1KR99 LRRNT_2 domain-containing protein n=2 Tax=Glycine max TaxID=3847 RepID=I1KR99_SOYBN
Glyma.07G128200	125.117	-1.26673	0.18726	1.69094e-12	2.4044e-11	UniRef100_I1KJU5 Saposin B-type domain-containing protein n=2 Tax=Soja TaxID=1462606 RepID=I1KJU5_SOYBN
Glyma.02G191500	101.015	-1.26788	0.204621	7.39384e-11	9.12345e-10	UniRef100_I1JGE2 Mur_ligase_M domain-containing protein n=3 Tax=Soja TaxID=1462606 RepID=I1JGE2_SOYBN
Glyma.05G123000	26.9489	-1.26875	0.410344	0.000204417	0.00102726	UniRef100_A0A0B2QN87 Putative WRKY transcription factor 9 n=1 Tax=Glycine soja TaxID=3848 RepID=A0A0B2QN87_GLYSO
Glyma.06G183400	27.6138	-1.27211	0.430093	0.000315176	0.00151965	UniRef100_I1KCH2 BURP domain-containing protein n=1 Tax=Glycine max TaxID=3847 RepID=I1KCH2_SOYBN
Glyma.02G124100	920.012	-1.27295	0.0884344	7.43755e-48	5.07792e-46	UniRef100_I1JEL2 MFS domain-containing protein n=2 Tax=Soja TaxID=1462606 RepID=I1JEL2_SOYBN
Glyma.05G052700	19.7326	-1.27299	0.486669	0.000840927	0.0036841	UniRef100_A0A0B2PB70 Protein NSP-INTERACTING KINASE 2 n=3 Tax=Soja TaxID=1462606 RepID=A0A0B2PB70_GLYSO
Glyma.07G043100	1001.12	-1.27348	0.0883328	5.09526e-48	3.51866e-46	UniRef100_I1KHG3 J domain-containing protein n=1 Tax=Glycine max TaxID=3847 RepID=I1KHG3_SOYBN
Glyma.01G002501	74.313	-1.27349	0.246451	2.86149e-08	2.6712e-07	UniRef100_A0A445LWX7 Protein OSB2, chloroplastic isoform B n=3 Tax=Glycine soja TaxID=3848 RepID=A0A445LWX7_GLYSO
Glyma.13G104000	141.073	-1.27512	0.191561	3.63547e-12	5.05592e-11	UniRef100_A0A0R0GSW3 Beta-galactosidase n=1 Tax=Glycine max TaxID=3847 RepID=A0A0R0GSW3_SOYBN
Glyma.02G146900	633.579	-1.27531	0.0960953	4.54336e-41	2.55198e-39	UniRef100_I1JFA0 Uncharacterized protein n=2 Tax=Soja TaxID=1462606 RepID=I1JFA0_SOYBN
Glyma.04G088000	1299.34	-1.2759	0.0837897	3.04395e-53	2.35919e-51	UniRef100_I1JUZ7 Inositol-tetrakisphosphate 1-kinase n=2 Tax=Glycine max TaxID=3847 RepID=I1JUZ7_SOYBN
Glyma.13G310700	608.451	-1.27635	0.107555	2.34379e-33	1.03107e-31	UniRef100_I1M465 Kinesin motor domain-containing protein n=2 Tax=Soja TaxID=1462606 RepID=I1M465_SOYBN
Glyma.19G011700	4277.4	-1.277	0.0551864	2.44898e-119	7.37081e-117	UniRef100_A0A0B2QQ56 Alpha-dioxygenase 1 isoform A n=3 Tax=Soja TaxID=1462606 RepID=A0A0B2QQ56_GLYSO
Glyma.12G148200	138.76	-1.27879	0.186394	8.22938e-13	1.20235e-11	UniRef100_A0A445HQI3 Receptor-like protein kinase THESEUS 1 n=2 Tax=Glycine soja TaxID=3848 RepID=A0A445HQI3_GLYSO
Glyma.11G213100	22.4017	-1.27943	0.452882	0.000470917	0.00219459	UniRef100_I1LM84 Protein kinase domain-containing protein n=1 Tax=Glycine max TaxID=3847 RepID=I1LM84_SOYBN
Glyma.08G269900	43.8597	-1.28049	0.341634	1.98328e-05	0.000122069	UniRef100_A0A0R0IZ02 Uncharacterized protein n=2 Tax=Soja TaxID=1462606 RepID=A0A0R0IZ02_SOYBN
Glyma.15G276000	42.583	-1.28051	0.321525	7.71745e-06	5.11005e-05	UniRef100_I1MJQ7 DNA topoisomerase 2 n=1 Tax=Glycine max TaxID=3847 RepID=I1MJQ7_SOYBN
Glyma.15G143700	105.24	-1.28065	0.200178	1.95671e-11	2.54944e-10	UniRef100_I1MGH2 Fn3_like domain-containing protein n=3 Tax=Soja TaxID=1462606 RepID=I1MGH2_SOYBN
Glyma.03G200900	23.7566	-1.28095	0.455868	0.000482386	0.00224168	UniRef100_I1JQ75 Peptidase A1 domain-containing protein n=1 Tax=Glycine max TaxID=3847 RepID=I1JQ75_SOYBN
Glyma.08G043800	240.433	-1.28228	0.141551	1.71495e-20	4.11553e-19	UniRef100_I1KQ89 PMEI domain-containing protein n=1 Tax=Glycine max TaxID=3847 RepID=I1KQ89_SOYBN
Glyma.10G028300	14.6562	-1.28262	0.579081	0.00228362	0.00890973	UniRef100_A0A445IH80 Sucrose-binding protein isoform A n=3 Tax=Soja TaxID=1462606 RepID=A0A445IH80_GLYSO
Glyma.14G170100	17.3413	-1.28308	0.585346	0.0023403	0.00909844	UniRef100_K7M7J8 FLZ-type domain-containing protein n=2 Tax=Soja TaxID=1462606 RepID=K7M7J8_SOYBN
Glyma.17G140000	2064.92	-1.28436	0.0863605	6.48599e-51	4.71337e-49	UniRef100_I1MUZ2 AAI domain-containing protein n=2 Tax=Soja TaxID=1462606 RepID=I1MUZ2_SOYBN
Glyma.16G157100	712.016	-1.28452	0.0937885	1.34694e-43	8.13505e-42	UniRef100_I1MNZ0 Uncharacterized protein n=2 Tax=Soja TaxID=1462606 RepID=I1MNZ0_SOYBN
Glyma.01G004600	32.5514	-1.28478	0.36956	5.48538e-05	0.0003097	UniRef100_A0A0B2RI28 Arabinogalactan peptide 20 n=2 Tax=Soja TaxID=1462606 RepID=A0A0B2RI28_GLYSO
Glyma.11G092600	21.4244	-1.28529	0.468818	0.000589739	0.00268866	UniRef100_A0A445HZE4 Uncharacterized protein n=2 Tax=Soja TaxID=1462606 RepID=A0A445HZE4_GLYSO
Glyma.15G099500	344.039	-1.28639	0.121246	3.4767e-27	1.16374e-25	UniRef100_I1MF89 MFS domain-containing protein n=2 Tax=Soja TaxID=1462606 RepID=I1MF89_SOYBN
Glyma.15G037000	27.679	-1.28653	0.400695	0.000136425	0.000711519	UniRef100_A0A445GNW6 Scarecrow-like protein 9 n=1 Tax=Glycine soja TaxID=3848 RepID=A0A445GNW6_GLYSO
Glyma.17G232255	4598.83	-1.28714	0.0653742	3.47918e-87	5.89942e-85	UniRef100_I1J3Z3 SE domain-containing protein n=1 Tax=Glycine max TaxID=3847 RepID=I1J3Z3_SOYBN
Glyma.09G047300	31.0902	-1.28786	0.391754	0.00010594	0.00056366	UniRef100_I1L122 DNA helicase n=2 Tax=Soja TaxID=1462606 RepID=I1L122_SOYBN
Glyma.02G010900	227.328	-1.28792	0.149375	8.31543e-19	1.80812e-17	UniRef100_A0A0B2PLN1 WRKY transcription factor n=2 Tax=Soja TaxID=1462606 RepID=A0A0B2PLN1_GLYSO
Glyma.11G044400	56.5955	-1.28805	0.288948	9.30791e-07	7.12305e-06	UniRef100_K7LN13 Uncharacterized protein n=1 Tax=Glycine max TaxID=3847 RepID=K7LN13_SOYBN
Glyma.06G182200	14.1138	-1.28875	0.585605	0.00234767	0.00912025	UniRef100_I1KCF8 Dof-type domain-containing protein n=4 Tax=Soja TaxID=1462606 RepID=I1KCF8_SOYBN
Glyma.17G145000	247.951	-1.2891	0.144543	6.05855e-20	1.41081e-18	UniRef100_A0A445G6S0 DeSI-like protein isoform A n=2 Tax=Soja TaxID=1462606 RepID=A0A445G6S0_GLYSO
Glyma.15G243300	40.0388	-1.28918	0.343496	1.9151e-05	0.000118134	UniRef100_I1MIY0 Cytochrome P450 n=2 Tax=Glycine max TaxID=3847 RepID=I1MIY0_SOYBN
Glyma.01G155500	29.3968	-1.2892	0.406329	0.000154708	0.000797313	UniRef100_A0A445M3Q5 2-oxoglutarate-dependent dioxygenase DAO n=3 Tax=Soja TaxID=1462606 RepID=A0A445M3Q5_GLYSO
Glyma.13G253500	39.4313	-1.29011	0.336146	1.37413e-05	8.68103e-05	UniRef100_I1M2I9 BHLH domain-containing protein n=5 Tax=Soja TaxID=1462606 RepID=I1M2I9_SOYBN
Glyma.04G123800	82.0947	-1.29066	0.242412	1.22762e-08	1.19768e-07	UniRef100_I1JVV5 Ubiquinol oxidase n=3 Tax=Soja TaxID=1462606 RepID=I1JVV5_SOYBN
Glyma.18G191600	27.0566	-1.29114	0.406192	0.000152703	0.000788558	UniRef100_C6T2Y1 AAI domain-containing protein n=2 Tax=Soja TaxID=1462606 RepID=C6T2Y1_SOYBN
Glyma.12G215300	40.6807	-1.2912	0.329704	9.91036e-06	6.44343e-05	UniRef100_I1LUS1 SHSP domain-containing protein n=2 Tax=Soja TaxID=1462606 RepID=I1LUS1_SOYBN
Glyma.12G199500	122.508	-1.29184	0.196432	5.97907e-12	8.16123e-11	UniRef100_I1LUB4 Uncharacterized protein n=1 Tax=Glycine max TaxID=3847 RepID=I1LUB4_SOYBN
Glyma.06G167300	89.9856	-1.29199	0.223407	8.89318e-10	9.83752e-09	UniRef100_K7KVI3 Uncharacterized protein n=2 Tax=Glycine max TaxID=3847 RepID=K7KVI3_SOYBN
Glyma.17G201900	104.241	-1.29257	0.204417	3.1371e-11	4.02639e-10	UniRef100_I1MWJ3 Uncharacterized protein n=2 Tax=Soja TaxID=1462606 RepID=I1MWJ3_SOYBN
Glyma.10G177300	14.7433	-1.29364	0.590066	0.00238436	0.00924884	UniRef100_A0A0B2RF78 Protein NSP-INTERACTING KINASE 2 n=2 Tax=Soja TaxID=1462606 RepID=A0A0B2RF78_GLYSO
Glyma.17G115700	41.4582	-1.29452	0.363575	3.78766e-05	0.000221071	UniRef100_A0A0R4J5P6 Uncharacterized protein n=2 Tax=Soja TaxID=1462606 RepID=A0A0R4J5P6_SOYBN
Glyma.13G252600	88.3451	-1.29599	0.231941	2.698e-09	2.83349e-08	UniRef100_C6SY84 SCP domain-containing protein n=1 Tax=Glycine max TaxID=3847 RepID=C6SY84_SOYBN
Glyma.09G196000	3167.63	-1.29769	0.0622255	1.73814e-97	3.67113e-95	UniRef100_K7LEW4 3-hydroxy-3-methylglutaryl coenzyme A reductase n=2 Tax=Soja TaxID=1462606 RepID=K7LEW4_SOYBN
Glyma.11G022400	31.1041	-1.29815	0.407458	0.000141797	0.000737619	UniRef100_I1LGE4 RING-type domain-containing protein n=2 Tax=Soja TaxID=1462606 RepID=I1LGE4_SOYBN
Glyma.13G291400	223.24	-1.29828	0.143063	1.43686e-20	3.45735e-19	UniRef100_K7M2J7 BHLH domain-containing protein n=2 Tax=Soja TaxID=1462606 RepID=K7M2J7_SOYBN
Glyma.02G157700	31.3561	-1.29846	0.417861	0.000181569	0.000921028	UniRef100_A0A0R0L415 Condensin complex subunit 1 n=1 Tax=Glycine max TaxID=3847 RepID=A0A0R0L415_SOYBN
Glyma.02G293100	107.23	-1.29913	0.211179	9.35174e-11	1.14494e-09	UniRef100_I1JJC0 Uncharacterized protein n=1 Tax=Glycine max TaxID=3847 RepID=I1JJC0_SOYBN
Glyma.10G100800	15.9237	-1.30008	0.570784	0.00194107	0.00772604	UniRef100_A0A445IKI5 Guanylate kinase 2 n=3 Tax=Soja TaxID=1462606 RepID=A0A445IKI5_GLYSO
Glyma.01G047900	55.4091	-1.30159	0.293649	1.02326e-06	7.7706e-06	UniRef100_I1J5R0 ZF-HD dimerization-type domain-containing protein n=1 Tax=Glycine max TaxID=3847 RepID=I1J5R0_SOYBN
Glyma.20G241500	2037.38	-1.30252	0.0791932	1.05375e-61	1.0286e-59	UniRef100_C6SVP9 Chalcone-flavonone isomerase family protein n=1 Tax=Glycine max TaxID=3847 RepID=C6SVP9_SOYBN
Glyma.04G136000	745.685	-1.30258	0.0875156	5.32268e-51	3.87579e-49	UniRef100_A0A0B2PGF3 Aspartic proteinase nepenthesin-1 n=2 Tax=Soja TaxID=1462606 RepID=A0A0B2PGF3_GLYSO
Glyma.03G141700	514.652	-1.30277	0.101893	2.51372e-38	1.32731e-36	UniRef100_A0A445LC15 Transcription factor bHLH130 isoform A n=2 Tax=Soja TaxID=1462606 RepID=A0A445LC15_GLYSO
Glyma.14G148100	17.6313	-1.30372	0.528277	0.00121568	0.00511495	UniRef100_I1MA26 WAT1-related protein n=2 Tax=Soja TaxID=1462606 RepID=I1MA26_SOYBN
Glyma.05G156000	126.753	-1.3051	0.186146	2.92007e-13	4.40536e-12	UniRef100_I1K3W5 X8 domain-containing protein n=3 Tax=Soja TaxID=1462606 RepID=I1K3W5_SOYBN
Glyma.01G171100	91.6869	-1.30581	0.239338	5.7101e-09	5.7743e-08	UniRef100_I1J8R4 Peroxidase n=2 Tax=Soja TaxID=1462606 RepID=I1J8R4_SOYBN
Glyma.11G067500	93.0803	-1.3095	0.236181	3.39973e-09	3.53347e-08	UniRef100_I1LHR4 Uncharacterized protein n=2 Tax=Soja TaxID=1462606 RepID=I1LHR4_SOYBN
Glyma.08G139200	185.708	-1.30976	0.159395	2.53235e-17	5.02257e-16	UniRef100_A0A445JEG4 Heavy metal-associated isoprenylated plant protein 23 isoform A n=2 Tax=Soja TaxID=1462606 RepID=A0A445JEG4_GLYSO
Glyma.18G003200	80.458	-1.30988	0.233632	2.48937e-09	2.62891e-08	UniRef100_A0A0B2QRK8 Xyloglucan endotransglucosylase/hydrolase n=2 Tax=Soja TaxID=1462606 RepID=A0A0B2QRK8_GLYSO
Glyma.08G281600	560.036	-1.3105	0.10224	1.65315e-38	8.79335e-37	UniRef100_I1KXA1 Uncharacterized protein n=2 Tax=Soja TaxID=1462606 RepID=I1KXA1_SOYBN
Glyma.06G202300	15.5468	-1.3114	0.568881	0.00176941	0.00710855	UniRef100_Q8W3Y5 Flavonoid 3'-hydroxylase n=4 Tax=Glycine max TaxID=3847 RepID=Q8W3Y5_SOYBN
Glyma.14G171500	468.079	-1.31141	0.113299	6.5962e-32	2.74781e-30	UniRef100_I1MAS1 AP2/ERF domain-containing protein n=1 Tax=Glycine max TaxID=3847 RepID=I1MAS1_SOYBN
Glyma.16G079000	18.6845	-1.31145	0.544566	0.00135773	0.00563128	UniRef100_UPI000E21B6F9 receptor-like protein 52 n=1 Tax=Glycine max TaxID=3847 RepID=UPI000E21B6F9
Glyma.15G160500	133.559	-1.31205	0.191738	9.47824e-13	1.37701e-11	UniRef100_UPI00103FD1BC mediator of RNA polymerase II transcription subunit 18 isoform X1 n=1 Tax=Glycine soja TaxID=3848 RepID=UPI00103FD1BC
Glyma.04G066900	4359.33	-1.31213	0.0646249	1.51088e-92	2.82739e-90	UniRef100_A0A445KX32 EIN3-binding F-box protein 1 isoform B n=1 Tax=Glycine soja TaxID=3848 RepID=A0A445KX32_GLYSO
Glyma.02G233300	229.847	-1.31264	0.143016	5.32219e-21	1.30852e-19	UniRef100_K7KAA7 Uncharacterized protein n=1 Tax=Glycine max TaxID=3847 RepID=K7KAA7_SOYBN
Glyma.08G182900	23.6777	-1.31273	0.469369	0.000483284	0.00224556	UniRef100_I1KUH3 WAT1-related protein n=2 Tax=Soja TaxID=1462606 RepID=I1KUH3_SOYBN
Glyma.13G239100	1497.14	-1.31333	0.0724096	1.97048e-74	2.62612e-72	UniRef100_UPI0007192D6B probable ubiquitin-conjugating enzyme E2 24 isoform X1 n=1 Tax=Glycine max TaxID=3847 RepID=UPI0007192D6B
Glyma.06G003200	86.747	-1.31357	0.235288	2.7643e-09	2.89974e-08	UniRef100_A0A0R0J9K8 Uncharacterized protein n=1 Tax=Glycine max TaxID=3847 RepID=A0A0R0J9K8_SOYBN
Glyma.20G099400	139.101	-1.31383	0.209344	4.08076e-11	5.17822e-10	UniRef100_K7N2N1 Homeobox domain-containing protein n=2 Tax=Soja TaxID=1462606 RepID=K7N2N1_SOYBN
Glyma.15G039400	40.0772	-1.31431	0.351732	1.97342e-05	0.000121504	UniRef100_I1MDG3 Uncharacterized protein n=1 Tax=Glycine max TaxID=3847 RepID=I1MDG3_SOYBN
Glyma.10G189400	14.969	-1.31553	0.576091	0.00185698	0.00742649	UniRef100_I1LCE3 Amino_oxidase domain-containing protein n=2 Tax=Glycine max TaxID=3847 RepID=I1LCE3_SOYBN
Glyma.08G092800	124.982	-1.31578	0.192226	9.0246e-13	1.31481e-11	UniRef100_A0A0B2R5J2 Protein SRG1 n=2 Tax=Soja TaxID=1462606 RepID=A0A0B2R5J2_GLYSO
Glyma.11G149825	214.265	-1.31629	0.171996	2.38203e-15	4.21932e-14	UniRef100_UPI00103991E7 ethylene-responsive transcription factor RAP2-7-like isoform X1 n=1 Tax=Glycine soja TaxID=3848 RepID=UPI00103991E7
Glyma.09G111800	121.139	-1.31637	0.224844	5.54937e-10	6.27903e-09	UniRef100_K7LD73 VQ domain-containing protein n=3 Tax=Soja TaxID=1462606 RepID=K7LD73_SOYBN
Glyma.11G193500	330.028	-1.31678	0.119313	3.11933e-29	1.14493e-27	UniRef100_A0A445I2T9 Putative glucuronoxylan glucuronosyltransferase IRX7 n=1 Tax=Glycine soja TaxID=3848 RepID=A0A445I2T9_GLYSO
Glyma.16G198700	102	-1.31682	0.219831	2.48245e-10	2.91289e-09	UniRef100_K7MIM2 Protein DETOXIFICATION n=2 Tax=Soja TaxID=1462606 RepID=K7MIM2_SOYBN
Glyma.10G265400	140.407	-1.31813	0.186902	2.08364e-13	3.17531e-12	UniRef100_A0A0R0I6J5 Uncharacterized protein n=2 Tax=Soja TaxID=1462606 RepID=A0A0R0I6J5_SOYBN
Glyma.16G106900	15.0842	-1.31851	0.600735	0.00226539	0.00885297	UniRef100_I1MMI1 Uncharacterized protein n=2 Tax=Soja TaxID=1462606 RepID=I1MMI1_SOYBN
Glyma.17G192100	360.149	-1.31876	0.116414	1.15032e-30	4.56051e-29	UniRef100_A0A0B2P3C8 Early nodulin-93 n=2 Tax=Soja TaxID=1462606 RepID=A0A0B2P3C8_GLYSO
Glyma.11G156722	1022.44	-1.31903	0.0807684	7.47759e-61	7.14466e-59	UniRef100_A0A445I3D3 Beta-galactosidase n=1 Tax=Glycine soja TaxID=3848 RepID=A0A445I3D3_GLYSO
Glyma.08G062200	18.385	-1.31904	0.518831	0.00098165	0.00422426	UniRef100_A0A0B2SG56 Uncharacterized protein n=2 Tax=Soja TaxID=1462606 RepID=A0A0B2SG56_GLYSO
Glyma.07G021100	59.716	-1.31944	0.271363	1.35404e-07	1.16688e-06	UniRef100_A0A445JR16 Cyclin-dependent kinase B1-2 isoform A n=2 Tax=Soja TaxID=1462606 RepID=A0A445JR16_GLYSO
Glyma.17G051300	19.5395	-1.31978	0.547625	0.00131733	0.00548512	UniRef100_K7MK17 Uncharacterized protein n=2 Tax=Glycine max TaxID=3847 RepID=K7MK17_SOYBN
Glyma.08G138600	61.0506	-1.32064	0.272156	1.39566e-07	1.20131e-06	UniRef100_I1KT54 STAS domain-containing protein n=2 Tax=Soja TaxID=1462606 RepID=I1KT54_SOYBN
Glyma.12G236500	726.707	-1.32067	0.0973795	8.01418e-43	4.67606e-41	UniRef100_K7LWL6 NB-ARC domain-containing protein n=2 Tax=Glycine max TaxID=3847 RepID=K7LWL6_SOYBN
Glyma.03G088900	174.404	-1.32079	0.162991	6.65156e-17	1.2895e-15	UniRef100_C5HU39 AIR12 n=1 Tax=Glycine max TaxID=3847 RepID=C5HU39_SOYBN
Glyma.17G199200	307.314	-1.32084	0.125691	1.01677e-26	3.30083e-25	UniRef100_A0A0B2RGZ7 Plasma membrane ATPase n=2 Tax=Soja TaxID=1462606 RepID=A0A0B2RGZ7_GLYSO
Glyma.06G216500	9859.44	-1.32115	0.0625618	6.64721e-100	1.48196e-97	UniRef100_Q02921 Early nodulin-93 n=3 Tax=Soja TaxID=1462606 RepID=NO93_SOYBN
Glyma.10G179200	351.771	-1.32329	0.122844	5.87492e-28	2.02853e-26	UniRef100_A0A0R0I2D9 Uncharacterized protein n=1 Tax=Glycine max TaxID=3847 RepID=A0A0R0I2D9_SOYBN
Glyma.11G141700	189.392	-1.32515	0.154334	1.11704e-18	2.41148e-17	UniRef100_A0A445I1K5 Histone H2B n=2 Tax=Soja TaxID=1462606 RepID=A0A445I1K5_GLYSO
Glyma.09G179400	423.427	-1.32557	0.116672	8.38547e-31	3.33544e-29	UniRef100_I1L485 LEA_2 domain-containing protein n=1 Tax=Glycine max TaxID=3847 RepID=I1L485_SOYBN
Glyma.20G064500	258.041	-1.3262	0.135238	1.28842e-23	3.64113e-22	UniRef100_I1NE88 VQ domain-containing protein n=3 Tax=Soja TaxID=1462606 RepID=I1NE88_SOYBN
Glyma.07G117300	2187.84	-1.32676	0.0746745	1.52359e-71	1.94444e-69	UniRef100_A0A0B2P1P9 FLZ-type domain-containing protein n=2 Tax=Soja TaxID=1462606 RepID=A0A0B2P1P9_GLYSO
Glyma.06G132200	174.16	-1.32723	0.185221	8.80649e-14	1.38469e-12	UniRef100_A0A445K914 Uncharacterized protein n=2 Tax=Soja TaxID=1462606 RepID=A0A445K914_GLYSO
Glyma.08G232400	439.097	-1.32754	0.109424	8.65753e-35	3.98832e-33	NA
Glyma.13G319400	347.568	-1.32841	0.119398	1.15962e-29	4.33114e-28	UniRef100_C6TCK3 Uncharacterized protein n=2 Tax=Soja TaxID=1462606 RepID=C6TCK3_SOYBN
Glyma.08G261500	127.413	-1.32874	0.187596	1.65931e-13	2.55235e-12	UniRef100_K7L8Z1 AP2/ERF domain-containing protein n=1 Tax=Glycine max TaxID=3847 RepID=K7L8Z1_SOYBN
Glyma.14G082300	29.4461	-1.32979	0.411833	0.000122797	0.000646042	UniRef100_K7M5K9 Uncharacterized protein n=2 Tax=Soja TaxID=1462606 RepID=K7M5K9_SOYBN
Glyma.02G034200	487.257	-1.3305	0.114824	6.09935e-32	2.55261e-30	UniRef100_I1JC18 RING-type E3 ubiquitin transferase n=1 Tax=Glycine max TaxID=3847 RepID=I1JC18_SOYBN
Glyma.11G177900	66.1435	-1.33147	0.266546	6.61698e-08	5.92428e-07	UniRef100_A0A368RZS7 Histone H4 n=1 Tax=Setaria italica TaxID=4555 RepID=A0A368RZS7_SETIT
Glyma.18G077000	17.7224	-1.33207	0.512753	0.000848473	0.00371221	UniRef100_K7MQI0 Uncharacterized protein n=2 Tax=Soja TaxID=1462606 RepID=K7MQI0_SOYBN
Glyma.20G018800	53.3897	-1.33228	0.355251	1.79839e-05	0.000111372	UniRef100_A0A0R4J634 Uncharacterized protein n=2 Tax=Soja TaxID=1462606 RepID=A0A0R4J634_SOYBN
[truncated: 1,175 more rows]

## Sheet: Supplementary Table 2
Supplementary Table 2: List of differentially expressed genes identified in the Williams 82 USDA110 vs LVM105 comparison.
Gene ID	base Mean	log2 Fold Change	lfc SE	p value	p adj	Annotation
Glyma.06G312600	951.722	14.9895	3.43757	6.49841e-30	8.9119e-29	UniRef100_A0A445KGG9 Proline-rich receptor-like protein kinase PERK12 isoform N n=2 Tax=Glycine soja TaxID=3848 RepID=A0A445KGG9_GLYSO
Glyma.07G236700	571.635	14.1976	3.39149	1.51856e-26	1.80585e-25	UniRef100_K7L3I1 Uncharacterized protein n=2 Tax=Soja TaxID=1462606 RepID=K7L3I1_SOYBN
Glyma.15G162000	438.059	13.7783	3.35042	2.51441e-25	2.85204e-24	UniRef100_I1MGY8 Protein kinase domain-containing protein n=1 Tax=Glycine max TaxID=3847 RepID=I1MGY8_SOYBN
Glyma.20G129000	409.29	13.6616	3.33579	1.06905e-24	1.17604e-23	UniRef100_I1NFX3 SPX domain-containing protein n=1 Tax=Glycine max TaxID=3847 RepID=I1NFX3_SOYBN
Glyma.10G135600	307.818	13.2048	3.28657	2.58863e-23	2.67399e-22	UniRef100_UPI0007192832 F-box/LRR-repeat protein At4g14103 isoform X1 n=1 Tax=Glycine max TaxID=3847 RepID=UPI0007192832
Glyma.15G083200	267.752	12.9743	3.26188	2.02033e-22	2.01604e-21	UniRef100_I1MES6 Uncharacterized protein n=3 Tax=Soja TaxID=1462606 RepID=I1MES6_SOYBN
Glyma.02G254100	205.815	12.5481	3.2245	8.29125e-21	7.6483e-20	UniRef100_K7KAQ5 Polyketide_cyc domain-containing protein n=1 Tax=Glycine max TaxID=3847 RepID=K7KAQ5_SOYBN
Glyma.17G036800	180.542	12.3363	3.20133	3.12605e-20	2.78984e-19	UniRef100_K7MJT4 Uncharacterized protein n=2 Tax=Soja TaxID=1462606 RepID=K7MJT4_SOYBN
Glyma.19G045900	164.636	12.1797	3.17267	6.55928e-20	5.77838e-19	UniRef100_K7MWJ8 MADS-box domain-containing protein n=2 Tax=Soja TaxID=1462606 RepID=K7MWJ8_SOYBN
Glyma.04G031500	162.372	12.1675	3.1801	6.61744e-20	5.82552e-19	UniRef100_K7KHU8 AMP-binding domain-containing protein n=2 Tax=Soja TaxID=1462606 RepID=K7KHU8_SOYBN
Glyma.10G293100	150.759	12.0383	3.17139	3.89705e-19	3.30057e-18	UniRef100_A0A0R0IB33 Uncharacterized protein n=1 Tax=Glycine max TaxID=3847 RepID=A0A0R0IB33_SOYBN
Glyma.20G003600	148.546	12.0216	3.1656	2.10042e-19	1.80427e-18	UniRef100_K7N0J9 Methyltransf_2 domain-containing protein n=1 Tax=Glycine max TaxID=3847 RepID=K7N0J9_SOYBN
Glyma.20G070400	144.941	11.9825	3.16041	2.43733e-19	2.08605e-18	UniRef100_A0A445F1R8 Glycerol-3-phosphate 2-O-acyltransferase 6 n=1 Tax=Glycine soja TaxID=3848 RepID=A0A445F1R8_GLYSO
Glyma.08G161200	128.12	11.7691	3.13602	1.79956e-18	1.47088e-17	UniRef100_A0A0R0IMT8 Uncharacterized protein n=2 Tax=Soja TaxID=1462606 RepID=A0A0R0IMT8_SOYBN
Glyma.19G026600	120.916	11.6839	3.12767	2.0987e-18	1.70906e-17	UniRef100_K7MW57 Purple acid phosphatase n=1 Tax=Glycine max TaxID=3847 RepID=K7MW57_SOYBN
Glyma.11G076400	119.511	11.66	3.12566	2.98027e-18	2.40869e-17	UniRef100_A0A0R0HN21 Uncharacterized protein n=2 Tax=Soja TaxID=1462606 RepID=A0A0R0HN21_SOYBN
Glyma.03G088300	114.42	11.5912	3.11851	4.53313e-18	3.62554e-17	UniRef100_A0A445LA53 Uncharacterized protein (Fragment) n=1 Tax=Glycine soja TaxID=3848 RepID=A0A445LA53_GLYSO
Glyma.13G243500	110.324	11.5322	3.1111	5.85589e-18	4.65475e-17	UniRef100_I1M294 Carboxypeptidase n=3 Tax=Soja TaxID=1462606 RepID=I1M294_SOYBN
Glyma.08G095300	101.783	11.3931	3.09806	2.13469e-17	1.64399e-16	UniRef100_I1KRT1 MADS-box domain-containing protein n=1 Tax=Glycine max TaxID=3847 RepID=I1KRT1_SOYBN
Glyma.05G007100	96.5016	11.3093	3.0879	3.39129e-17	2.58106e-16	UniRef100_I1K1G3 Carbonic anhydrase n=5 Tax=Soja TaxID=1462606 RepID=I1K1G3_SOYBN
Glyma.06G120400	1582.7	11.271	0.715528	4.72594e-54	1.34888e-52	UniRef100_K7KUL8 Protein kinase domain-containing protein n=1 Tax=Glycine max TaxID=3847 RepID=K7KUL8_SOYBN
Glyma.09G086900	90.4789	11.2006	3.07606	6.59064e-17	4.93019e-16	UniRef100_K7LCL3 Uncharacterized protein n=2 Tax=Soja TaxID=1462606 RepID=K7LCL3_SOYBN
Glyma.13G183600	1034.29	11.0385	0.816381	7.37567e-40	1.40808e-38	UniRef100_A0A368UHD2 Uncharacterized protein n=1 Tax=Glycine max TaxID=3847 RepID=A0A368UHD2_SOYBN
Glyma.11G074850	76.1469	10.9012	3.03252	5.1508e-16	3.63398e-15	NA
Glyma.12G182500	75.4898	10.8919	3.05009	1.06664e-15	7.38126e-15	UniRef100_UPI00103B89C0 uncharacterized protein LOC114379577 isoform X1 n=1 Tax=Glycine soja TaxID=3848 RepID=UPI00103B89C0
Glyma.11G203900	934.89	10.8898	0.819814	1.48018e-38	2.68533e-37	UniRef100_I1LM25 LRAT domain-containing protein n=2 Tax=Glycine max TaxID=3847 RepID=I1LM25_SOYBN
Glyma.08G081200	71.0208	10.7995	3.0346	9.88566e-16	6.85107e-15	UniRef100_A0A445JBH4 Germin-like protein n=3 Tax=Soja TaxID=1462606 RepID=A0A445JBH4_GLYSO
Glyma.12G184366	981.815	10.5801	0.717064	1.8429e-47	4.41239e-46	UniRef100_A0A445HS59 ABSCISIC ACID-INSENSITIVE 5-like protein 1 isoform E n=2 Tax=Soja TaxID=1462606 RepID=A0A445HS59_GLYSO
Glyma.15G025200	62.2504	10.5763	3.00702	3.80199e-15	2.54255e-14	UniRef100_K7M960 Uncharacterized protein n=1 Tax=Glycine max TaxID=3847 RepID=K7M960_SOYBN
Glyma.04G133200	59.6939	10.4983	3.00177	9.91819e-15	6.43356e-14	UniRef100_I1JW23 TF-B3 domain-containing protein n=1 Tax=Glycine max TaxID=3847 RepID=I1JW23_SOYBN
Glyma.04G249800	56.3687	10.4088	2.99238	1.27109e-14	8.17732e-14	UniRef100_K7KM71 Uncharacterized protein n=2 Tax=Soja TaxID=1462606 RepID=K7KM71_SOYBN
Glyma.10G187600	53.1656	10.3084	2.98895	4.19767e-14	2.60509e-13	UniRef100_A0A0R0HVB8 Uncharacterized protein n=1 Tax=Glycine max TaxID=3847 RepID=A0A0R0HVB8_SOYBN
Glyma.20G151200	52.776	10.3004	2.97834	2.287e-14	1.44412e-13	UniRef100_A0A0R0ENG6 Uncharacterized protein n=2 Tax=Soja TaxID=1462606 RepID=A0A0R0ENG6_SOYBN
Glyma.05G009902	50.0691	10.2121	2.97506	5.3145e-14	3.27764e-13	UniRef100_A0A0R0JPJ6 Protein kinase domain-containing protein n=1 Tax=Glycine max TaxID=3847 RepID=A0A0R0JPJ6_SOYBN
Glyma.01G151951	48.7999	10.1642	2.97524	1.07314e-13	6.49585e-13	UniRef100_A0A445J4D5 Alkylated DNA repair protein ALKBH8-like isoform D n=1 Tax=Glycine soja TaxID=3848 RepID=A0A445J4D5_GLYSO
Glyma.16G120500	220.449	10.1542	1.3249	7.30725e-18	5.77786e-17	UniRef100_K7MGU4 Uncharacterized protein n=1 Tax=Glycine max TaxID=3847 RepID=K7MGU4_SOYBN
Glyma.03G032400	2225.78	10.1235	0.427496	1.32526e-122	1.45662e-120	UniRef100_K7KCK4 SPX domain-containing protein n=1 Tax=Glycine max TaxID=3847 RepID=K7KCK4_SOYBN
Glyma.02G131600	47.3025	10.1083	2.96591	1.24208e-13	7.46679e-13	UniRef100_A0A0R0L321 Uncharacterized protein n=2 Tax=Soja TaxID=1462606 RepID=A0A0R0L321_SOYBN
Glyma.08G071200	519.939	10.0294	0.818677	4.81316e-33	7.35773e-32	UniRef100_I1KR16 ABC transporter domain-containing protein n=1 Tax=Glycine max TaxID=3847 RepID=I1KR16_SOYBN
Glyma.17G061100	1157.1	10.0265	0.553111	5.37955e-72	2.36511e-70	UniRef100_I1MSN7 Uncharacterized protein n=1 Tax=Glycine max TaxID=3847 RepID=I1MSN7_SOYBN
Glyma.17G141300	192.401	9.9502	1.31321	1.65928e-17	1.28338e-16	UniRef100_K7MLK7 Uncharacterized protein n=2 Tax=Soja TaxID=1462606 RepID=K7MLK7_SOYBN
Glyma.18G034000	41.9034	9.91067	2.94037	2.86144e-13	1.67515e-12	UniRef100_I1MZ87 Uncharacterized protein n=1 Tax=Glycine max TaxID=3847 RepID=I1MZ87_SOYBN
Glyma.20G029700	40.7336	9.85829	2.93457	3.92986e-13	2.28039e-12	UniRef100_A0A0R0E613 PMEI domain-containing protein n=1 Tax=Glycine max TaxID=3847 RepID=A0A0R0E613_SOYBN
Glyma.04G242900	40.5298	9.8498	2.9355	4.44511e-13	2.56788e-12	UniRef100_A0A0B2SH13 Proline-rich receptor-like protein kinase PERK8 n=1 Tax=Glycine soja TaxID=3848 RepID=A0A0B2SH13_GLYSO
Glyma.07G070300	1960.42	9.82982	0.407948	9.17891e-127	1.05839e-124	UniRef100_A0A0R0J4K3 Uncharacterized protein n=2 Tax=Glycine max TaxID=3847 RepID=A0A0R0J4K3_SOYBN
Glyma.20G138900	451.807	9.8292	0.816669	6.06119e-32	8.97361e-31	UniRef100_I1NG71 Uncharacterized protein n=3 Tax=Soja TaxID=1462606 RepID=I1NG71_SOYBN
Glyma.11G091600	5393.12	9.77817	1.12824	1.73588e-19	1.4966e-18	UniRef100_K7LNS5 Uncharacterized protein n=2 Tax=Soja TaxID=1462606 RepID=K7LNS5_SOYBN
Glyma.08G346100	561.748	9.76466	0.717553	1.08388e-40	2.13091e-39	UniRef100_I1KZ12 Uncharacterized protein n=3 Tax=Soja TaxID=1462606 RepID=I1KZ12_SOYBN
Glyma.06G109100	38.4003	9.76261	2.9276	7.67979e-13	4.36407e-12	UniRef100_A0A0R0JLK1 Uncharacterized protein n=1 Tax=Glycine max TaxID=3847 RepID=A0A0R0JLK1_SOYBN
Glyma.15G085700	38.7525	9.73714	2.95041	5.40278e-12	2.87623e-11	UniRef100_A0A0R0G943 Uncharacterized protein n=2 Tax=Soja TaxID=1462606 RepID=A0A0R0G943_SOYBN
Glyma.10G293500	283.224	9.66995	0.977267	1.53721e-21	1.47183e-20	UniRef100_I1LFG4 TRANSKETOLASE_1 domain-containing protein n=2 Tax=Soja TaxID=1462606 RepID=I1LFG4_SOYBN
Glyma.09G055800	34.9436	9.59196	2.90984	2.30185e-12	1.26187e-11	UniRef100_A0A445IX77 Rust resistance kinase Lr10 isoform D n=1 Tax=Glycine soja TaxID=3848 RepID=A0A445IX77_GLYSO
Glyma.10G293600	149.515	9.57193	1.31066	2.3427e-16	1.68928e-15	UniRef100_K7LM44 PMR5N domain-containing protein n=2 Tax=Glycine max TaxID=3847 RepID=K7LM44_SOYBN
Glyma.16G085600	6275.56	9.55499	0.230736	0	0	UniRef100_I1MM76 Uncharacterized protein n=3 Tax=Soja TaxID=1462606 RepID=I1MM76_SOYBN
Glyma.08G115350	33.5521	9.52951	2.9024	2.99314e-12	1.62684e-11	UniRef100_K7L634 Uncharacterized protein n=1 Tax=Glycine max TaxID=3847 RepID=K7L634_SOYBN
Glyma.17G152200	33.0567	9.49352	2.90601	5.52669e-12	2.94136e-11	UniRef100_K7MLS6 Uncharacterized protein n=2 Tax=Soja TaxID=1462606 RepID=K7MLS6_SOYBN
Glyma.19G012100	138.92	9.46001	1.3136	6.11469e-16	4.28827e-15	UniRef100_K7MVW5 PMR5N domain-containing protein n=1 Tax=Glycine max TaxID=3847 RepID=K7MVW5_SOYBN
Glyma.01G069150	32.4231	9.45208	2.90732	1.00967e-11	5.26475e-11	NA
Glyma.09G177976	31.8321	9.42857	2.89873	7.71683e-12	4.06382e-11	UniRef100_C8YZ71 RACK1 n=2 Tax=Phaseoleae TaxID=163735 RepID=C8YZ71_PHAVU
Glyma.18G184300	31.3955	9.41287	2.89476	7.40207e-12	3.90518e-11	UniRef100_UPI00103B6A03 pectin acetylesterase 10-like n=1 Tax=Glycine soja TaxID=3848 RepID=UPI00103B6A03
Glyma.08G063233	31.387	9.40197	2.89806	1.09415e-11	5.69498e-11	UniRef100_A0A445JAQ7 Branched-chain-amino-acid aminotransferase 2, chloroplastic isoform A n=2 Tax=Glycine soja TaxID=3848 RepID=A0A445JAQ7_GLYSO
Glyma.10G199100	230458	9.38624	0.473605	1.18846e-88	7.48312e-87	UniRef100_P02238 Leghemoglobin A n=4 Tax=Soja TaxID=1462606 RepID=LGBA_SOYBN
Glyma.08G208200	30.7854	9.37375	2.88982	8.69577e-12	4.56082e-11	UniRef100_A0A0B2SUA5 Uncharacterized protein n=2 Tax=Soja TaxID=1462606 RepID=A0A0B2SUA5_GLYSO
Glyma.19G253500	1017.34	9.35389	0.488816	6.52282e-81	3.46807e-79	UniRef100_I1NCI5 Uncharacterized protein n=2 Tax=Soja TaxID=1462606 RepID=I1NCI5_SOYBN
Glyma.09G068300	30.4512	9.33729	2.90055	2.49685e-11	1.26765e-10	UniRef100_A0A0R0I4V3 Uncharacterized protein n=2 Tax=Soja TaxID=1462606 RepID=A0A0R0I4V3_SOYBN
Glyma.11G061100	715.56	9.33467	0.568217	8.18731e-60	2.73322e-58	UniRef100_A0A445HXS8 Uncharacterized protein n=1 Tax=Glycine soja TaxID=3848 RepID=A0A445HXS8_GLYSO
Glyma.08G063000	28.8846	9.2566	2.89135	3.19046e-11	1.6057e-10	UniRef100_A0A0R0INS4 Branched-chain-amino-acid aminotransferase n=2 Tax=Soja TaxID=1462606 RepID=A0A0R0INS4_SOYBN
Glyma.18G263700	384.053	9.2001	0.71775	1.84055e-36	3.1067e-35	UniRef100_A0A0R0F4I8 Uncharacterized protein n=2 Tax=Soja TaxID=1462606 RepID=A0A0R0F4I8_SOYBN
Glyma.16G033800	586.78	9.18909	1.21958	2.09043e-15	1.42045e-14	UniRef100_I1MKU0 FAD-binding FR-type domain-containing protein n=2 Tax=Soja TaxID=1462606 RepID=I1MKU0_SOYBN
Glyma.18G033900	6523.42	9.16032	0.44548	1.43579e-95	1.03196e-93	UniRef100_A0A0R0EVP0 Uncharacterized protein n=1 Tax=Glycine max TaxID=3847 RepID=A0A0R0EVP0_SOYBN
Glyma.06G028200	715.23	9.15872	0.522393	1.08108e-67	4.30028e-66	UniRef100_K7KSQ8 Purple acid phosphatase n=3 Tax=Soja TaxID=1462606 RepID=K7KSQ8_SOYBN
Glyma.15G161900	26.2802	9.1054	2.85972	3.49051e-11	1.74944e-10	UniRef100_UPI00103CFBA9 LEAF RUST 10 DISEASE-RESISTANCE LOCUS RECEPTOR-LIKE PROTEIN KINASE-like 2.2 n=1 Tax=Glycine soja TaxID=3848 RepID=UPI00103CFBA9
Glyma.10G102300	26.1621	9.08846	2.8719	6.09947e-11	3.00497e-10	UniRef100_I1LA81 F-box domain-containing protein n=1 Tax=Glycine max TaxID=3847 RepID=I1LA81_SOYBN
Glyma.08G127000	2517.54	9.07267	1.62633	6.77712e-10	3.06672e-09	UniRef100_A0A445JDV2 Serine/threonine-protein kinase SAPK7 isoform A n=1 Tax=Glycine soja TaxID=3848 RepID=A0A445JDV2_GLYSO
Glyma.05G069600	25.6516	9.06194	2.85679	4.65452e-11	2.31158e-10	UniRef100_A0A0R0K0X6 Uncharacterized protein n=2 Tax=Glycine max TaxID=3847 RepID=A0A0R0K0X6_SOYBN
Glyma.19G074000	76910	9.05745	0.212073	0	0	UniRef100_I1N7C9 Uncharacterized protein n=1 Tax=Glycine max TaxID=3847 RepID=I1N7C9_SOYBN
Glyma.13G348600	25.5148	9.0506	2.86865	6.90138e-11	3.38451e-10	UniRef100_K7M3M5 Uncharacterized protein n=3 Tax=Soja TaxID=1462606 RepID=K7M3M5_SOYBN
Glyma.03G073744	24.6076	8.98836	2.85363	8.55445e-11	4.16801e-10	UniRef100_A0A0R0KHP9 NB-ARC domain-containing protein (Fragment) n=1 Tax=Glycine max TaxID=3847 RepID=A0A0R0KHP9_SOYBN
Glyma.06G224200	100.157	8.98129	1.30839	1.30101e-14	8.36552e-14	UniRef100_A0A445KD41 Thylakoid lumenal 16.5 kDa protein, chloroplastic isoform A n=3 Tax=Soja TaxID=1462606 RepID=A0A445KD41_GLYSO
Glyma.18G005000	1297.84	8.87966	0.540564	3.952e-62	1.38449e-60	UniRef100_A0A0B2QW74 Uncharacterized protein n=2 Tax=Soja TaxID=1462606 RepID=A0A0B2QW74_GLYSO
Glyma.10G256000	23.147	8.87725	2.84674	1.8689e-10	8.87018e-10	UniRef100_A0A0B2QTP6 Uncharacterized protein n=2 Tax=Soja TaxID=1462606 RepID=A0A0B2QTP6_GLYSO
Glyma.11G066400	502.998	8.82413	0.567359	8.20513e-54	2.31729e-52	UniRef100_I1LHQ1 MFS domain-containing protein n=2 Tax=Soja TaxID=1462606 RepID=I1LHQ1_SOYBN
Glyma.08G063100	89.1511	8.77983	1.32352	9.69413e-14	5.88696e-13	UniRef100_A0A445JAP6 Zinc transporter ZTP29 isoform A n=3 Tax=Soja TaxID=1462606 RepID=A0A445JAP6_GLYSO
Glyma.05G119900	21.1506	8.72304	2.82685	3.34478e-10	1.55491e-09	UniRef100_A0A445JB95 Beta-xylosidase/alpha-L-arabinofuranosidase 2 isoform D n=1 Tax=Glycine soja TaxID=3848 RepID=A0A445JB95_GLYSO
Glyma.02G189900	21.4579	8.72285	2.84113	6.2565e-10	2.83968e-09	UniRef100_A0A0R0L5Y0 Uncharacterized protein n=2 Tax=Soja TaxID=1462606 RepID=A0A0R0L5Y0_SOYBN
Glyma.01G014600	21.0432	8.70837	2.82961	4.33936e-10	1.99653e-09	UniRef100_I1J4R3 Uncharacterized protein n=1 Tax=Glycine max TaxID=3847 RepID=I1J4R3_SOYBN
Glyma.04G076900	2444.59	8.69888	0.269785	2.16352e-226	9.03629e-224	UniRef100_I1JUN8 Uncharacterized protein n=5 Tax=Soja TaxID=1462606 RepID=I1JUN8_SOYBN
Glyma.03G253600	83.6541	8.68475	1.32386	1.80159e-13	1.07087e-12	UniRef100_A0A445LH20 Putative receptor-like protein kinase isoform A n=1 Tax=Glycine soja TaxID=3848 RepID=A0A445LH20_GLYSO
Glyma.05G069532	20.8808	8.6802	2.82608	6.38042e-10	2.89391e-09	UniRef100_UPI0007191942 methylsterol monooxygenase 1-1 n=1 Tax=Glycine max TaxID=3847 RepID=UPI0007191942
Glyma.02G189850	20.8618	8.67284	2.83387	7.43954e-10	3.35435e-09	NA
Glyma.11G185200	692.41	8.66975	0.486289	1.87388e-70	7.97725e-69	UniRef100_I1LKT8 Fatty acyl-CoA reductase n=1 Tax=Glycine max TaxID=3847 RepID=I1LKT8_SOYBN
Glyma.05G158250	20.5106	8.66233	2.82262	4.83006e-10	2.2139e-09	NA
Glyma.11G223900	935.679	8.65295	0.395227	7.30813e-106	6.20119e-104	UniRef100_I1LMK2 Uncharacterized protein n=2 Tax=Soja TaxID=1462606 RepID=I1LMK2_SOYBN
Glyma.07G192900	80.2523	8.6334	1.308	1.29554e-13	7.77574e-13	UniRef100_A0A0B2PHV8 NAC domain-containing protein 18 n=2 Tax=Soja TaxID=1462606 RepID=A0A0B2PHV8_GLYSO
Glyma.03G073740	79.3512	8.61361	1.31066	1.64208e-13	9.7853e-13	UniRef100_A0A0R0K6W6 Glycosyltransferase n=1 Tax=Glycine max TaxID=3847 RepID=A0A0R0K6W6_SOYBN
Glyma.14G141700	20.0597	8.60942	2.81956	8.93303e-10	4.00277e-09	UniRef100_K7M6P9 Uncharacterized protein n=2 Tax=Soja TaxID=1462606 RepID=K7M6P9_SOYBN
Glyma.09G009700	19.897	8.59157	2.82718	1.14054e-09	5.05635e-09	UniRef100_K7LB65 Uncharacterized protein n=2 Tax=Soja TaxID=1462606 RepID=K7LB65_SOYBN
Glyma.01G218700	19.6184	8.57826	2.81894	8.96918e-10	4.01773e-09	UniRef100_A0A0R0LN55 Uncharacterized protein n=2 Tax=Soja TaxID=1462606 RepID=A0A0R0LN55_SOYBN
Glyma.18G256000	1387.69	8.57546	0.325485	4.68126e-152	7.96238e-150	UniRef100_K7MUQ8 Uncharacterized protein n=1 Tax=Glycine max TaxID=3847 RepID=K7MUQ8_SOYBN
Glyma.09G163000	19.3337	8.55981	2.81535	9.27201e-10	4.14676e-09	UniRef100_C6T5E3 Uncharacterized protein n=1 Tax=Glycine max TaxID=3847 RepID=C6T5E3_SOYBN
Glyma.04G084100	809.877	8.54083	0.415082	8.59142e-94	6.014e-92	UniRef100_I1JUV6 Uncharacterized protein n=1 Tax=Glycine max TaxID=3847 RepID=I1JUV6_SOYBN
Glyma.08G106100	18.7431	8.50333	2.80677	1.09262e-09	4.85308e-09	UniRef100_A0A0R0JVQ5 Amidase domain-containing protein n=1 Tax=Glycine max TaxID=3847 RepID=A0A0R0JVQ5_SOYBN
Glyma.13G120400	180.163	8.48041	0.832623	2.07476e-23	2.15145e-22	UniRef100_K7LZ91 GTD-binding domain-containing protein n=2 Tax=Soja TaxID=1462606 RepID=K7LZ91_SOYBN
Glyma.03G126700	18.4931	8.47626	2.81106	1.61743e-09	7.06887e-09	UniRef100_A0A0R0KQ04 F-box domain-containing protein n=1 Tax=Glycine max TaxID=3847 RepID=A0A0R0KQ04_SOYBN
Glyma.14G150800	18.2005	8.44835	2.80399	1.58473e-09	6.93321e-09	UniRef100_UPI00103DCF08 uncharacterized protein LOC114384584 isoform X1 n=1 Tax=Glycine soja TaxID=3848 RepID=UPI00103DCF08
Glyma.11G024800	69.721	8.4284	1.31208	5.81108e-13	3.33036e-12	UniRef100_A0A0R0HBJ1 Uncharacterized protein n=2 Tax=Soja TaxID=1462606 RepID=A0A0R0HBJ1_SOYBN
Glyma.13G348500	12998.1	8.40808	0.693962	4.35792e-35	7.08539e-34	UniRef100_I1M5A7 Uncharacterized protein n=1 Tax=Glycine max TaxID=3847 RepID=I1M5A7_SOYBN
Glyma.13G200700	69.1894	8.40557	1.31108	6.23495e-13	3.56459e-12	UniRef100_K7M0S9 Uncharacterized protein n=1 Tax=Glycine max TaxID=3847 RepID=K7M0S9_SOYBN
Glyma.11G049400	18.1766	8.40162	2.83524	6.95469e-09	2.87979e-08	UniRef100_K7LN41 Uncharacterized protein n=2 Tax=Soja TaxID=1462606 RepID=K7LN41_SOYBN
Glyma.07G010100	17.7372	8.38581	2.81139	3.5624e-09	1.51243e-08	UniRef100_A0A0R0J1X2 Uncharacterized protein n=1 Tax=Glycine max TaxID=3847 RepID=A0A0R0J1X2_SOYBN
Glyma.16G141751	17.9206	8.36511	2.84241	1.14503e-08	4.64611e-08	NA
Glyma.06G323700	210.91	8.3361	0.728563	2.68894e-29	3.58175e-28	UniRef100_I1KFX9 Uncharacterized protein n=1 Tax=Glycine max TaxID=3847 RepID=I1KFX9_SOYBN
Glyma.19G243700	1118.08	8.32326	0.330125	9.93292e-140	1.42511e-137	UniRef100_K7N033 DUF4005 domain-containing protein n=2 Tax=Soja TaxID=1462606 RepID=K7N033_SOYBN
Glyma.17G108700	2891.66	8.27483	0.236241	1.15045e-270	7.72239e-268	UniRef100_I1MU28 Uncharacterized protein n=2 Tax=Soja TaxID=1462606 RepID=I1MU28_SOYBN
Glyma.05G160400	152.875	8.2343	0.827161	1.8417e-22	1.84219e-21	UniRef100_A0A0R0K2K5 Uncharacterized protein n=1 Tax=Glycine max TaxID=3847 RepID=A0A0R0K2K5_SOYBN
Glyma.08G076300	3272.31	8.2128	0.239277	9.38715e-260	5.88105e-257	UniRef100_I1KR70 Uncharacterized protein n=1 Tax=Glycine max TaxID=3847 RepID=I1KR70_SOYBN
Glyma.10G108000	15.5554	8.16292	2.7815	7.46586e-09	3.08465e-08	UniRef100_A0A0R0HZT2 Protein kinase domain-containing protein n=1 Tax=Glycine max TaxID=3847 RepID=A0A0R0HZT2_SOYBN
Glyma.18G092800	57.0469	8.11988	1.31911	5.03866e-12	2.68771e-11	UniRef100_A0A0B2PXN8 Uncharacterized protein n=2 Tax=Soja TaxID=1462606 RepID=A0A0B2PXN8_GLYSO
Glyma.01G171200	602.069	8.10959	0.420251	8.62127e-83	4.82253e-81	UniRef100_K7K4C1 CRAL-TRIO domain-containing protein n=2 Tax=Soja TaxID=1462606 RepID=K7K4C1_SOYBN
Glyma.09G259700	14.9762	8.08702	2.77802	1.1483e-08	4.65839e-08	UniRef100_A0A151TBL5 Uncharacterized protein n=2 Tax=Cajanus cajan TaxID=3821 RepID=A0A151TBL5_CAJCA
Glyma.08G201100	14.8683	8.07334	2.78166	1.43322e-08	5.75739e-08	UniRef100_A0A0R0IX96 HPt domain-containing protein n=1 Tax=Glycine max TaxID=3847 RepID=A0A0R0IX96_SOYBN
Glyma.16G180400	730.373	8.03688	0.367192	5.84651e-106	4.97218e-104	UniRef100_I1MPK0 C2 domain-containing protein n=2 Tax=Soja TaxID=1462606 RepID=I1MPK0_SOYBN
Glyma.03G126900	14.569	8.01504	2.78924	2.71379e-08	1.06151e-07	UniRef100_UPI00023379A0 F-box protein At2g26850 isoform X1 n=1 Tax=Glycine max TaxID=3847 RepID=UPI00023379A0
Glyma.10G121518	92.9914	8.00582	0.988944	4.07557e-15	2.71777e-14	UniRef100_A0A445ILB8 Uncharacterized protein n=1 Tax=Glycine soja TaxID=3848 RepID=A0A445ILB8_GLYSO
Glyma.01G095000	2447.61	8.00301	0.239655	1.69993e-246	9.12865e-244	UniRef100_C6SWW4 Uncharacterized protein n=3 Tax=Soja TaxID=1462606 RepID=C6SWW4_SOYBN
Glyma.16G088800	53.3434	7.99069	1.32531	1.28845e-11	6.67947e-11	UniRef100_A0A0R0FXS8 Uncharacterized protein n=1 Tax=Glycine max TaxID=3847 RepID=A0A0R0FXS8_SOYBN
Glyma.07G136900	52.9373	7.99048	1.31751	9.66756e-12	5.04727e-11	UniRef100_I1KK33 Protein kinase domain-containing protein n=1 Tax=Glycine max TaxID=3847 RepID=I1KK33_SOYBN
Glyma.18G211100	14.0531	7.96709	2.77445	2.46443e-08	9.67092e-08	UniRef100_K7MTR6 Peroxidase n=1 Tax=Glycine max TaxID=3847 RepID=K7MTR6_SOYBN
Glyma.09G252466	13.8844	7.95912	2.76426	1.93261e-08	7.66076e-08	UniRef100_A0A445J5X8 ALBINO3-like protein 2, chloroplastic isoform A n=1 Tax=Glycine soja TaxID=3848 RepID=A0A445J5X8_GLYSO
Glyma.10G051800	5581.2	7.95884	0.18324	0	0	UniRef100_A0A0R0I151 RING-CH-type domain-containing protein n=2 Tax=Glycine max TaxID=3847 RepID=A0A0R0I151_SOYBN
Glyma.08G297800	51.3294	7.95196	1.32372	1.57129e-11	8.09997e-11	UniRef100_UPI0007191AF1 serine/arginine-rich splicing factor SR45a n=1 Tax=Glycine max TaxID=3847 RepID=UPI0007191AF1
Glyma.12G184432	13.7618	7.94054	2.7638	2.1747e-08	8.57786e-08	UniRef100_A0A0B2R118 ABSCISIC ACID-INSENSITIVE 5-like protein 1 n=1 Tax=Glycine soja TaxID=3848 RepID=A0A0B2R118_GLYSO
Glyma.17G027900	13.6555	7.92816	2.7631	2.33039e-08	9.16503e-08	UniRef100_I1MRK3 Protein DETOXIFICATION n=2 Tax=Soja TaxID=1462606 RepID=I1MRK3_SOYBN
Glyma.10G036800	2058.45	7.92338	0.666064	7.02605e-34	1.10137e-32	UniRef100_C3UZD2 Phosphate transporter 5 n=2 Tax=Soja TaxID=1462606 RepID=C3UZD2_SOYBN
Glyma.10G199000	105626	7.89147	0.219871	2.51854e-283	1.89344e-280	UniRef100_P02235 Leghemoglobin C1 n=3 Tax=Soja TaxID=1462606 RepID=LGB1_SOYBN
Glyma.03G237300	153.074	7.84472	0.729665	2.33277e-26	2.75491e-25	UniRef100_I1JRC2 Lipoxygenase n=2 Tax=Soja TaxID=1462606 RepID=I1JRC2_SOYBN
Glyma.20G204100	13.0559	7.84283	2.75375	3.38568e-08	1.3115e-07	UniRef100_A0A0B2PZJ9 Inorganic phosphate transporter 1-4 n=2 Tax=Soja TaxID=1462606 RepID=A0A0B2PZJ9_GLYSO
Glyma.02G107900	13.3702	7.84184	2.78723	8.00565e-08	2.98071e-07	UniRef100_I1JE49 Uncharacterized protein n=1 Tax=Glycine max TaxID=3847 RepID=I1JE49_SOYBN
Glyma.19G182700	1621.07	7.83895	0.283873	5.68967e-169	1.14986e-166	UniRef100_K7MZ20 Uncharacterized protein n=2 Tax=Soja TaxID=1462606 RepID=K7MZ20_SOYBN
Glyma.13G329200	12.8184	7.80335	2.74599	3.88429e-08	1.49371e-07	UniRef100_K7M392 Uncharacterized protein n=1 Tax=Glycine max TaxID=3847 RepID=K7M392_SOYBN
Glyma.13G036300	247.376	7.79473	0.566942	2.37229e-42	4.9159e-41	UniRef100_A0A445HBA6 Proline-rich receptor-like protein kinase PERK13 isoform A n=2 Tax=Soja TaxID=1462606 RepID=A0A445HBA6_GLYSO
Glyma.10G126051	81940.5	7.78028	0.195944	0	0	NA
Glyma.09G034600	12.5986	7.77659	2.75312	5.0128e-08	1.90334e-07	UniRef100_K7LBL6 Uncharacterized protein n=2 Tax=Soja TaxID=1462606 RepID=K7LBL6_SOYBN
Glyma.05G102700	12.1194	7.69683	2.75942	9.76335e-08	3.60905e-07	UniRef100_A0A0R0JTJ5 PAS domain-containing protein n=1 Tax=Glycine max TaxID=3847 RepID=A0A0R0JTJ5_SOYBN
Glyma.10G159700	503.124	7.67252	0.402506	1.95983e-80	1.02748e-78	UniRef100_I1LBH7 Cysteine synthase n=1 Tax=Glycine max TaxID=3847 RepID=I1LBH7_SOYBN
Glyma.08G132900	11.7641	7.6457	2.74117	8.57077e-08	3.18481e-07	UniRef100_K7L6G2 Uncharacterized protein n=2 Tax=Soja TaxID=1462606 RepID=K7L6G2_SOYBN
Glyma.20G149700	2224.56	7.61537	0.255483	1.67256e-197	4.79935e-195	UniRef100_C6T4N4 RING-type domain-containing protein n=1 Tax=Glycine max TaxID=3847 RepID=C6T4N4_SOYBN
Glyma.17G022600	11.5603	7.59622	2.7524	1.53841e-07	5.57119e-07	UniRef100_K7MJJ9 Uncharacterized protein n=2 Tax=Soja TaxID=1462606 RepID=K7MJJ9_SOYBN
Glyma.15G083000	128.308	7.59149	0.739582	3.93583e-24	4.2295e-23	UniRef100_I1MES4 Uncharacterized protein n=2 Tax=Soja TaxID=1462606 RepID=I1MES4_SOYBN
Glyma.20G024200	110410	7.58494	0.183048	0	0	UniRef100_K7N0Y1 Uncharacterized protein n=1 Tax=Glycine max TaxID=3847 RepID=K7N0Y1_SOYBN
Glyma.14G039200	11.3667	7.58199	2.73588	1.13429e-07	4.16672e-07	UniRef100_A0A0R0GHS3 Uncharacterized protein n=1 Tax=Glycine max TaxID=3847 RepID=A0A0R0GHS3_SOYBN
Glyma.07G058000	40.0263	7.54532	1.33356	1.88383e-10	8.93428e-10	UniRef100_A0A0R0J0I6 Uncharacterized protein n=2 Tax=Soja TaxID=1462606 RepID=A0A0R0J0I6_SOYBN
Glyma.20G192800	11.4186	7.54494	2.77705	3.60521e-07	1.25249e-06	UniRef100_I1NHS6 Uncharacterized protein n=1 Tax=Glycine max TaxID=3847 RepID=I1NHS6_SOYBN
Glyma.08G195000	1843.94	7.53298	0.23337	1.01203e-229	4.42352e-227	UniRef100_I1KUW2 Uncharacterized protein n=2 Tax=Glycine max TaxID=3847 RepID=I1KUW2_SOYBN
Glyma.13G008702	11.1305	7.52276	2.74661	2.07566e-07	7.41743e-07	UniRef100_K7LYD7 Uncharacterized protein n=1 Tax=Glycine max TaxID=3847 RepID=K7LYD7_SOYBN
Glyma.11G085750	10.8219	7.46668	2.7444	2.71988e-07	9.58834e-07	UniRef100_A0A445HYU6 Uncharacterized protein n=1 Tax=Glycine soja TaxID=3848 RepID=A0A445HYU6_GLYSO
Glyma.20G191200	67829.7	7.45467	0.221473	1.07507e-249	6.0316e-247	UniRef100_P02236 Leghemoglobin C2 n=3 Tax=Soja TaxID=1462606 RepID=LGB2_SOYBN
Glyma.06G194700	206.598	7.44084	0.836742	9.26562e-20	8.08859e-19	UniRef100_K7KVZ4 Uncharacterized protein n=2 Tax=Soja TaxID=1462606 RepID=K7KVZ4_SOYBN
Glyma.18G146500	10.5653	7.43256	2.72856	2.48131e-07	8.79017e-07	UniRef100_K7MSF4 Uncharacterized protein n=1 Tax=Glycine max TaxID=3847 RepID=K7MSF4_SOYBN
Glyma.02G099100	88.9292	7.42518	0.839432	3.15901e-18	2.548e-17	UniRef100_K7K7F4 C2H2-type domain-containing protein n=1 Tax=Glycine max TaxID=3847 RepID=K7K7F4_SOYBN
Glyma.17G019600	452.706	7.42114	0.389473	8.37619e-81	4.42842e-79	UniRef100_A0A445G0W6 Glycosyltransferase n=1 Tax=Glycine soja TaxID=3848 RepID=A0A445G0W6_GLYSO
Glyma.09G073050	191.164	7.40262	0.575777	1.33326e-37	2.33646e-36	UniRef100_A0A445IYE4 Uncharacterized protein n=2 Tax=Soja TaxID=1462606 RepID=A0A445IYE4_GLYSO
Glyma.11G177628	10.5296	7.40235	2.74388	3.87643e-07	1.34349e-06	UniRef100_UPI000295B765 uncharacterized protein LOC106797848 n=1 Tax=Glycine max TaxID=3847 RepID=UPI000295B765
Glyma.19G161400	650.851	7.39968	0.84188	6.00566e-20	5.3006e-19	UniRef100_C6SYI0 Uncharacterized protein n=2 Tax=Soja TaxID=1462606 RepID=C6SYI0_SOYBN
Glyma.16G048802	10.2908	7.39235	2.72923	3.00713e-07	1.05426e-06	UniRef100_K7MF98 Beta-galactosidase n=1 Tax=Glycine max TaxID=3847 RepID=K7MF98_SOYBN
Glyma.07G113200	4129.09	7.37261	0.197998	1.63177e-305	1.80406e-302	UniRef100_I1KJK8 Uncharacterized protein n=1 Tax=Glycine max TaxID=3847 RepID=I1KJK8_SOYBN
Glyma.09G126500	10.2344	7.3707	2.73405	3.76216e-07	1.30509e-06	UniRef100_UPI000295DADE S-type anion channel SLAH3 isoform X1 n=1 Tax=Glycine max TaxID=3847 RepID=UPI000295DADE
Glyma.04G006500	10.2227	7.36869	2.7298	3.45971e-07	1.20417e-06	UniRef100_K7KHG0 Uncharacterized protein n=2 Tax=Soja TaxID=1462606 RepID=K7KHG0_SOYBN
Glyma.02G229050	10.6325	7.36332	2.78946	1.12925e-06	3.71021e-06	NA
Glyma.03G038900	10.1708	7.36048	2.73331	3.92964e-07	1.36105e-06	UniRef100_K7KCQ7 Protein kinase domain-containing protein n=1 Tax=Glycine max TaxID=3847 RepID=K7KCQ7_SOYBN
Glyma.09G213400	85.3567	7.34239	0.86354	3.28747e-17	2.50441e-16	UniRef100_A0A0R0IBD2 Uncharacterized protein n=1 Tax=Glycine max TaxID=3847 RepID=A0A0R0IBD2_SOYBN
Glyma.12G191700	3130.12	7.33215	0.190284	0	0	UniRef100_I1LU34 Uncharacterized protein n=3 Tax=Soja TaxID=1462606 RepID=I1LU34_SOYBN
Glyma.18G260000	83.1945	7.32982	0.837562	7.18043e-18	5.68237e-17	UniRef100_I1N4E0 Uncharacterized protein n=1 Tax=Glycine max TaxID=3847 RepID=I1N4E0_SOYBN
Glyma.13G204800	82.4471	7.3297	0.841118	1.27666e-17	9.9522e-17	UniRef100_A0A445I7W4 ATP synthase gamma chain, chloroplastic isoform A n=2 Tax=Soja TaxID=1462606 RepID=A0A445I7W4_GLYSO
Glyma.11G026100	9.92301	7.32022	2.72703	4.30319e-07	1.48469e-06	UniRef100_A0A445HW62 Protein HAPLESS 2 n=1 Tax=Glycine soja TaxID=3848 RepID=A0A445HW62_GLYSO
Glyma.18G047000	179.048	7.31401	0.582151	7.00182e-36	1.16718e-34	UniRef100_K7MPY5 LRAT domain-containing protein n=1 Tax=Glycine max TaxID=3847 RepID=K7MPY5_SOYBN
Glyma.13G162600	3242.73	7.31224	0.183536	0	0	UniRef100_I1LZT6 Uncharacterized protein n=2 Tax=Soja TaxID=1462606 RepID=I1LZT6_SOYBN
Glyma.13G040200	9.98704	7.2914	2.74259	7.29076e-07	2.45112e-06	UniRef100_E8Z9B1 Phosphate transporter1-13 n=2 Tax=Soja TaxID=1462606 RepID=E8Z9B1_SOYBN
Glyma.08G108000	19978.1	7.28079	0.148169	0	0	UniRef100_I1KS58 Uncharacterized protein n=2 Tax=Soja TaxID=1462606 RepID=I1KS58_SOYBN
Glyma.06G085800	772.542	7.27988	0.305391	1.01321e-126	1.16473e-124	UniRef100_K7KTY4 Uncharacterized protein n=4 Tax=Soja TaxID=1462606 RepID=K7KTY4_SOYBN
Glyma.06G108051	335.003	7.25978	0.420012	9.59875e-67	3.73517e-65	UniRef100_UPI00103E00E8 auxin response factor 17-like n=1 Tax=Glycine soja TaxID=3848 RepID=UPI00103E00E8
Glyma.14G209000	638.165	7.245	0.338147	9.82222e-103	7.94016e-101	UniRef100_I1MBQ1 Uncharacterized protein n=1 Tax=Glycine max TaxID=3847 RepID=I1MBQ1_SOYBN
Glyma.02G114100	31.6203	7.1994	1.3375	1.35317e-09	5.96246e-09	UniRef100_K7K7S0 Uncharacterized protein n=1 Tax=Glycine max TaxID=3847 RepID=K7K7S0_SOYBN
Glyma.01G117200	208.581	7.18046	0.516773	7.80204e-44	1.69721e-42	UniRef100_A0A0R0L9K1 LRRNT_2 domain-containing protein n=1 Tax=Glycine max TaxID=3847 RepID=A0A0R0L9K1_SOYBN
Glyma.04G076950	9.26519	7.15049	2.74885	1.55236e-06	5.03089e-06	NA
Glyma.19G098500	36959.2	7.14497	0.120084	0	0	UniRef100_A0A0R0EKB4 GP-PDE domain-containing protein n=2 Tax=Soja TaxID=1462606 RepID=A0A0R0EKB4_SOYBN
Glyma.05G121600	10270.4	7.13954	0.176302	0	0	UniRef100_P16313 Nodulin-21 n=4 Tax=Soja TaxID=1462606 RepID=NO21_SOYBN
Glyma.17G195900	7781.18	7.12021	0.148778	0	0	UniRef100_A0A0B2QY00 Casein kinase 1-like protein 3 isoform B n=3 Tax=Soja TaxID=1462606 RepID=A0A0B2QY00_GLYSO
Glyma.11G071900	283.142	7.1112	0.436366	9.46194e-60	3.14478e-58	UniRef100_A0A445HYB2 Phosphatidylinositol/phosphatidylcholine transfer protein SFH12 isoform A n=2 Tax=Soja TaxID=1462606 RepID=A0A445HYB2_GLYSO
Glyma.05G051500	10497.5	7.10315	0.211514	9.31924e-249	5.15162e-246	UniRef100_I1K0F9 Uncharacterized protein n=2 Tax=Soja TaxID=1462606 RepID=I1K0F9_SOYBN
Glyma.13G328800	74826.8	7.09945	0.211686	7.52962e-248	4.10201e-245	UniRef100_A0A0R0GXC2 Uncharacterized protein n=2 Tax=Glycine max TaxID=3847 RepID=A0A0R0GXC2_SOYBN
Glyma.13G008802	8.83372	7.09072	2.71279	1.0884e-06	3.58384e-06	UniRef100_UPI00103B46EA desiccation-related protein PCC13-62-like n=1 Tax=Glycine soja TaxID=3848 RepID=UPI00103B46EA
Glyma.02G218200	172.442	7.07929	0.540384	7.92491e-39	1.45458e-37	UniRef100_I1JH43 Uncharacterized protein n=1 Tax=Glycine max TaxID=3847 RepID=I1JH43_SOYBN
Glyma.11G125500	2157.89	7.07326	0.213256	4.11454e-242	2.11871e-239	UniRef100_K7LPE3 Uncharacterized protein n=3 Tax=Soja TaxID=1462606 RepID=K7LPE3_SOYBN
Glyma.19G080702	28.7663	7.06227	1.32756	2.07703e-09	8.99799e-09	UniRef100_A0A0B2NQF2 ATP synthase mitochondrial F1 complex assembly factor 2 n=1 Tax=Glycine soja TaxID=3848 RepID=A0A0B2NQF2_GLYSO
Glyma.14G213300	6557.02	7.0597	0.156677	0	0	UniRef100_O82560 Glutamine synthetase cytosolic isozyme 2 n=5 Tax=Soja TaxID=1462606 RepID=GLNA2_SOYBN
Glyma.02G098200	68.2269	7.03027	0.844915	2.19095e-16	1.5832e-15	UniRef100_I1JDV5 Aa_trans domain-containing protein n=2 Tax=Glycine max TaxID=3847 RepID=I1JDV5_SOYBN
Glyma.13G247000	3776.77	7.0284	0.21953	3.65309e-226	1.50901e-223	UniRef100_I1M2D4 Uncharacterized protein n=2 Tax=Soja TaxID=1462606 RepID=I1M2D4_SOYBN
Glyma.18G187600	243.632	7.02082	0.466329	6.94023e-51	1.81169e-49	UniRef100_A0A0B2P4A9 Aldo-keto reductase family 4 member C9 n=1 Tax=Glycine soja TaxID=3848 RepID=A0A0B2P4A9_GLYSO
Glyma.03G252500	9.02641	6.99907	2.81591	7.70745e-06	2.29066e-05	UniRef100_I1JRU3 Lipase_GDSL domain-containing protein n=2 Tax=Soja TaxID=1462606 RepID=I1JRU3_SOYBN
Glyma.17G152300	606.975	6.98811	0.626851	2.87772e-30	3.99902e-29	UniRef100_A0A445G729 Purine permease 21 n=1 Tax=Glycine soja TaxID=3848 RepID=A0A445G729_GLYSO
Glyma.15G025300	6082	6.98583	0.4492	8.01807e-56	2.39396e-54	UniRef100_A0A445GN14 IQ domain-containing protein IQM1 isoform A n=2 Tax=Glycine soja TaxID=3848 RepID=A0A445GN14_GLYSO
Glyma.01G131400	1256.48	6.97996	0.253499	7.84735e-169	1.56905e-166	UniRef100_A0A445M2I3 Prosaposin isoform E n=3 Tax=Soja TaxID=1462606 RepID=A0A445M2I3_GLYSO
Glyma.08G037200	1581.95	6.95677	0.224169	1.29418e-212	4.50446e-210	UniRef100_A0A445J9N5 Protein NRT1/ PTR FAMILY 1.2 isoform A n=2 Tax=Soja TaxID=1462606 RepID=A0A445J9N5_GLYSO
Glyma.06G229100	1743.83	6.95622	0.226233	2.53088e-209	8.41909e-207	UniRef100_A0A0B2RJ78 Bifunctional polynucleotide phosphatase/kinase n=2 Tax=Soja TaxID=1462606 RepID=A0A0B2RJ78_GLYSO
Glyma.11G035700	364.701	6.95	0.369542	7.9494e-79	4.0056e-77	UniRef100_A0A0R0HJV6 DIOX_N domain-containing protein n=2 Tax=Soja TaxID=1462606 RepID=A0A0R0HJV6_SOYBN
Glyma.08G251700	1095.64	6.94999	0.26385	1.28819e-154	2.23147e-152	UniRef100_C6TNU0 F-box domain-containing protein n=2 Tax=Soja TaxID=1462606 RepID=C6TNU0_SOYBN
Glyma.19G232200	138.347	6.94492	0.578111	8.00444e-33	1.21669e-31	UniRef100_I1NBW1 Bidirectional sugar transporter SWEET n=2 Tax=Soja TaxID=1462606 RepID=I1NBW1_SOYBN
Glyma.09G055900	674.746	6.9434	0.285311	3.52277e-130	4.32748e-128	UniRef100_A0A445IX71 Rust resistance kinase Lr10 isoform A n=2 Tax=Soja TaxID=1462606 RepID=A0A445IX71_GLYSO
Glyma.02G285600	345.902	6.94274	0.377917	1.52986e-75	7.19744e-74	UniRef100_K7KBC6 Uncharacterized protein n=1 Tax=Glycine max TaxID=3847 RepID=K7KBC6_SOYBN
Glyma.09G082800	84.5387	6.93977	0.778301	4.31592e-19	3.64984e-18	UniRef100_A0A0R0I5M7 Uncharacterized protein n=1 Tax=Glycine max TaxID=3847 RepID=A0A0R0I5M7_SOYBN
Glyma.19G098600	589.388	6.93691	0.311797	2.23759e-110	2.04649e-108	UniRef100_I1N7X2 Protein kinase domain-containing protein n=2 Tax=Glycine max TaxID=3847 RepID=I1N7X2_SOYBN
Glyma.09G254700	951.52	6.91839	0.254344	5.1591e-164	9.69652e-162	UniRef100_I1L6F5 3-methyl-2-oxobutanoate hydroxymethyltransferase n=2 Tax=Glycine max TaxID=3847 RepID=I1L6F5_SOYBN
Glyma.13G129500	62.8925	6.91567	0.880099	8.2183e-15	5.36516e-14	UniRef100_C6T084 Uncharacterized protein n=2 Tax=Soja TaxID=1462606 RepID=C6T084_SOYBN
Glyma.03G066601	8.14342	6.91136	2.71774	2.77861e-06	8.73602e-06	UniRef100_A0A0R0KFK9 LRRNT_2 domain-containing protein n=1 Tax=Glycine max TaxID=3847 RepID=A0A0R0KFK9_SOYBN
Glyma.08G115401	62.0904	6.90146	0.861637	2.95537e-15	1.99161e-14	UniRef100_K7L634 Uncharacterized protein n=1 Tax=Glycine max TaxID=3847 RepID=K7L634_SOYBN
Glyma.17G061200	371.943	6.89997	0.587496	5.31152e-33	8.0998e-32	UniRef100_K7MK66 HP domain-containing protein n=1 Tax=Glycine max TaxID=3847 RepID=K7MK66_SOYBN
Glyma.13G364400	125141	6.89129	0.178051	0	0	UniRef100_C6TH86 Uncharacterized protein n=1 Tax=Glycine max TaxID=3847 RepID=C6TH86_SOYBN
Glyma.01G178800	188.236	6.89076	0.492875	3.08659e-44	6.76924e-43	UniRef100_K7K4H2 Uncharacterized protein n=1 Tax=Glycine max TaxID=3847 RepID=K7K4H2_SOYBN
Glyma.19G181800	692.794	6.88864	0.625649	2.28732e-29	3.0598e-28	UniRef100_I1NA92 Uncharacterized protein n=2 Tax=Soja TaxID=1462606 RepID=I1NA92_SOYBN
Glyma.05G069466	7.9737	6.87845	2.70881	2.79782e-06	8.79056e-06	UniRef100_UPI00103F661B eukaryotic initiation factor 4A-III homolog A-like n=1 Tax=Glycine soja TaxID=3848 RepID=UPI00103F661B
Glyma.07G134500	455.198	6.87589	0.328427	1.36057e-97	1.01677e-95	UniRef100_C6TF91 Uncharacterized protein n=2 Tax=Soja TaxID=1462606 RepID=C6TF91_SOYBN
Glyma.17G195800	26.0005	6.87502	1.33957	6.27588e-09	2.60847e-08	UniRef100_K7MMN9 Uncharacterized protein n=1 Tax=Glycine max TaxID=3847 RepID=K7MMN9_SOYBN
Glyma.04G079200	40829.5	6.87428	0.215076	1.76314e-225	7.05067e-223	UniRef100_I1JUQ9 Uncharacterized protein n=1 Tax=Glycine max TaxID=3847 RepID=I1JUQ9_SOYBN
Glyma.14G222700	3640.57	6.85305	0.18591	2.2699e-298	2.24541e-295	UniRef100_A0A0R0GGG0 Uncharacterized protein n=3 Tax=Soja TaxID=1462606 RepID=A0A0R0GGG0_SOYBN
Glyma.17G125300	486.11	6.84999	0.328807	3.34064e-97	2.47682e-95	UniRef100_I1MUJ8 Uncharacterized protein n=1 Tax=Glycine max TaxID=3847 RepID=I1MUJ8_SOYBN
Glyma.03G022400	43.2064	6.8458	1.01245	2.95739e-11	1.49279e-10	UniRef100_K7KCD5 Uncharacterized protein n=2 Tax=Soja TaxID=1462606 RepID=K7KCD5_SOYBN
Glyma.01G106700	916.259	6.8154	0.280931	7.91801e-132	1.00894e-129	UniRef100_A0A0R0L947 Uncharacterized protein n=2 Tax=Soja TaxID=1462606 RepID=A0A0R0L947_SOYBN
Glyma.02G103100	7.90971	6.8119	2.74178	6.00942e-06	1.81252e-05	UniRef100_A0A0B2PE22 ACT domain-containing protein n=2 Tax=Soja TaxID=1462606 RepID=A0A0B2PE22_GLYSO
Glyma.08G243300	1153.1	6.81176	0.223578	9.54487e-205	2.96522e-202	UniRef100_A0A0B2QB90 F-box protein n=3 Tax=Soja TaxID=1462606 RepID=A0A0B2QB90_GLYSO
Glyma.08G063167	59.472	6.80516	0.863146	4.34465e-15	2.89207e-14	UniRef100_UPI00071923FC putative branched-chain-amino-acid aminotransferase 7 n=1 Tax=Glycine max TaxID=3847 RepID=UPI00071923FC
Glyma.08G137400	142.127	6.77082	1.3044	1.53295e-08	6.13604e-08	UniRef100_A0A0R0IRJ8 Uncharacterized protein n=1 Tax=Glycine max TaxID=3847 RepID=A0A0R0IRJ8_SOYBN
Glyma.06G177600	88.037	6.72248	0.692386	3.60245e-22	3.56546e-21	UniRef100_I1KCB4 Uncharacterized protein n=2 Tax=Soja TaxID=1462606 RepID=I1KCB4_SOYBN
Glyma.05G170400	7.3531	6.72179	2.69997	4.87689e-06	1.4903e-05	UniRef100_I1K4B9 Uncharacterized protein n=1 Tax=Glycine max TaxID=3847 RepID=I1K4B9_SOYBN
Glyma.11G239500	7.38461	6.68859	2.72929	8.31818e-06	2.4605e-05	UniRef100_I1LNL6 TPR_REGION domain-containing protein n=1 Tax=Glycine max TaxID=3847 RepID=I1LNL6_SOYBN
Glyma.15G045000	43274.4	6.67724	0.183458	2.75805e-291	2.35625e-288	UniRef100_P08961 Nodulin-22 n=2 Tax=Glycine max TaxID=3847 RepID=NO22_SOYBN
Glyma.20G063100	285.243	6.65786	0.38639	7.4793e-67	2.93167e-65	UniRef100_Q941P4 Zinc transporter protein ZIP1 n=1 Tax=Glycine max TaxID=3847 RepID=Q941P4_SOYBN
Glyma.02G024300	240.196	6.654	0.444316	2.91734e-51	7.7173e-50	UniRef100_K7K618 Uncharacterized protein n=2 Tax=Soja TaxID=1462606 RepID=K7K618_SOYBN
Glyma.02G076600	1274.34	6.64793	0.229094	7.53434e-186	1.92664e-183	UniRef100_Q9XET1 Seed maturation protein PM31 n=2 Tax=Soja TaxID=1462606 RepID=Q9XET1_SOYBN
Glyma.03G177300	7.09901	6.64748	2.70181	6.83307e-06	2.04535e-05	UniRef100_UPI0002336F83 protein REVEILLE 8 n=1 Tax=Glycine max TaxID=3847 RepID=UPI0002336F83
Glyma.11G108300	224.684	6.64712	0.449714	3.97555e-50	1.01868e-48	UniRef100_I1LJ26 Uncharacterized protein n=3 Tax=Soja TaxID=1462606 RepID=I1LJ26_SOYBN
Glyma.10G047750	130.03	6.64586	0.586004	5.78251e-30	7.94752e-29	UniRef100_A0A445IIF0 Glutathione S-transferase L3 isoform A n=2 Tax=Glycine soja TaxID=3848 RepID=A0A445IIF0_GLYSO
Glyma.15G181800	1865.89	6.64168	0.436957	2.25605e-53	6.31459e-52	UniRef100_I1MHJ1 Uncharacterized protein n=2 Tax=Soja TaxID=1462606 RepID=I1MHJ1_SOYBN
Glyma.02G111000	37.0587	6.61628	1.01696	1.44099e-10	6.89669e-10	UniRef100_A0A368UIH1 GOLD domain-containing protein n=1 Tax=Glycine max TaxID=3847 RepID=A0A368UIH1_SOYBN
Glyma.18G197800	1761.2	6.58675	0.197454	1.26269e-244	6.68515e-242	UniRef100_A0A445FV34 Glycerol-3-phosphate 2-O-acyltransferase 6 n=3 Tax=Glycine soja TaxID=3848 RepID=A0A445FV34_GLYSO
Glyma.11G177419	7.22386	6.56438	2.78134	2.31427e-05	6.49496e-05	UniRef100_UPI000E21BE88 uncharacterized protein LOC106797838 n=1 Tax=Glycine max TaxID=3847 RepID=UPI000E21BE88
Glyma.08G195400	6.78474	6.5522	2.69899	9.60083e-06	2.81685e-05	UniRef100_I1KUW9 F-box domain-containing protein n=3 Tax=Soja TaxID=1462606 RepID=I1KUW9_SOYBN
Glyma.08G056300	6.78029	6.53759	2.70844	1.14264e-05	3.32445e-05	UniRef100_K7L551 Uncharacterized protein n=1 Tax=Glycine max TaxID=3847 RepID=K7L551_SOYBN
Glyma.13G280000	6.70417	6.5091	2.71396	1.36105e-05	3.92828e-05	UniRef100_A0A0R0GV83 NAC domain-containing protein n=3 Tax=Soja TaxID=1462606 RepID=A0A0R0GV83_SOYBN
Glyma.10G198800	34310.2	6.50061	0.218593	1.37767e-195	3.89372e-193	UniRef100_P02237 Leghemoglobin C3 n=3 Tax=Soja TaxID=1462606 RepID=LGB3_SOYBN
Glyma.08G250402	242.166	6.49816	0.394077	2.04272e-61	7.05106e-60	UniRef100_A0A0B2REN3 Hyoscyamine 6-dioxygenase n=1 Tax=Glycine soja TaxID=3848 RepID=A0A0B2REN3_GLYSO
Glyma.10G251500	225.477	6.48772	0.402725	1.86864e-58	5.97807e-57	UniRef100_I1LE84 Thiamine thiazole synthase, chloroplastic n=2 Tax=Soja TaxID=1462606 RepID=I1LE84_SOYBN
Glyma.03G227800	6.6335	6.4741	2.71268	1.50749e-05	4.32799e-05	UniRef100_A0A0B2Q2J8 Transcription factor PIF3 n=1 Tax=Glycine soja TaxID=3848 RepID=A0A0B2Q2J8_GLYSO
Glyma.15G210400	6.60389	6.47033	2.70943	1.47329e-05	4.23436e-05	UniRef100_K7MCR2 Uncharacterized protein n=2 Tax=Soja TaxID=1462606 RepID=K7MCR2_SOYBN
Glyma.06G145200	2461.44	6.46287	0.203103	2.43828e-224	9.54739e-222	UniRef100_I1KBA5 Uncharacterized protein n=2 Tax=Glycine max TaxID=3847 RepID=I1KBA5_SOYBN
Glyma.12G128900	2641.04	6.45412	0.16866	0	0	UniRef100_I1LSG9 Uncharacterized protein n=3 Tax=Soja TaxID=1462606 RepID=I1LSG9_SOYBN
Glyma.13G157000	725.257	6.43745	0.258592	7.27621e-138	1.02057e-135	UniRef100_A0A0B2QL18 Uncharacterized protein n=2 Tax=Soja TaxID=1462606 RepID=A0A0B2QL18_GLYSO
Glyma.06G108700	45.9921	6.42362	0.862219	1.16974e-13	7.05559e-13	UniRef100_I1KA45 Uncharacterized protein n=2 Tax=Soja TaxID=1462606 RepID=I1KA45_SOYBN
Glyma.05G011200	19.5394	6.42215	1.34849	5.91412e-08	2.23205e-07	UniRef100_C6T1M0 Uncharacterized protein n=2 Tax=Soja TaxID=1462606 RepID=C6T1M0_SOYBN
Glyma.08G365600	6.44817	6.40603	2.7296	2.33004e-05	6.53741e-05	UniRef100_A0A0R0IXJ4 AAA_lid_9 domain-containing protein n=2 Tax=Soja TaxID=1462606 RepID=A0A0R0IXJ4_SOYBN
Glyma.10G135500	1093.58	6.40435	0.223387	1.14468e-182	2.84957e-180	UniRef100_A0A0R0I131 F-box domain-containing protein n=2 Tax=Glycine max TaxID=3847 RepID=A0A0R0I131_SOYBN
Glyma.15G260900	1464.47	6.39731	0.22211	1.16241e-184	2.93256e-182	UniRef100_K7ME06 Uncharacterized protein n=1 Tax=Glycine max TaxID=3847 RepID=K7ME06_SOYBN
Glyma.06G065600	4261.21	6.39508	0.185345	1.01588e-262	6.58398e-260	UniRef100_A0A0R0JJ08 Flotillin-like n=4 Tax=Soja TaxID=1462606 RepID=A0A0R0JJ08_SOYBN
Glyma.10G209900	6.29693	6.39392	2.69512	1.65531e-05	4.72929e-05	UniRef100_A0A445IQH8 Vinorine synthase n=1 Tax=Glycine soja TaxID=3848 RepID=A0A445IQH8_GLYSO
Glyma.17G092800	7690.62	6.38059	0.172573	1.32386e-300	1.38233e-297	UniRef100_A0A0R0FKI8 Uncharacterized protein n=2 Tax=Soja TaxID=1462606 RepID=A0A0R0FKI8_SOYBN
Glyma.05G165400	57.5256	6.37822	0.759509	4.6237e-17	3.48796e-16	UniRef100_I1K466 Usp domain-containing protein n=2 Tax=Soja TaxID=1462606 RepID=I1K466_SOYBN
Glyma.19G146600	917.429	6.37385	0.227369	1.26895e-173	2.7257e-171	UniRef100_A0A0B2QXV3 Myb family transcription factor APL n=2 Tax=Soja TaxID=1462606 RepID=A0A0B2QXV3_GLYSO
Glyma.02G029500	19.1317	6.37044	1.36138	9.13069e-08	3.38617e-07	UniRef100_K7K648 Uncharacterized protein n=1 Tax=Glycine max TaxID=3847 RepID=K7K648_SOYBN
Glyma.19G021900	787.981	6.36995	0.24571	5.2562e-150	8.59046e-148	UniRef100_I1N646 NAC domain-containing protein n=2 Tax=Soja TaxID=1462606 RepID=I1N646_SOYBN
Glyma.08G216600	205.92	6.35743	0.415972	8.54517e-53	2.3636e-51	UniRef100_C6T440 AP2/ERF domain-containing protein n=2 Tax=Soja TaxID=1462606 RepID=C6T440_SOYBN
Glyma.04G220700	1114.13	6.34281	0.226687	2.91249e-174	6.36514e-172	UniRef100_I1JYA0 Uncharacterized protein n=3 Tax=Glycine max TaxID=3847 RepID=I1JYA0_SOYBN
Glyma.05G165451	31.3419	6.32891	1.05253	1.82017e-09	7.92633e-09	UniRef100_UPI0002962EA7 probable inactive poly [ADP-ribose] polymerase SRO2 n=1 Tax=Glycine max TaxID=3847 RepID=UPI0002962EA7
Glyma.16G087400	6.12468	6.3174	2.68931	2.10765e-05	5.94794e-05	UniRef100_A0A0R0FN73 Uncharacterized protein n=1 Tax=Glycine max TaxID=3847 RepID=A0A0R0FN73_SOYBN
Glyma.11G169891	650.626	6.31702	0.286979	6.76341e-109	6.02456e-107	UniRef100_A0A0B2R7H9 Putative 2-isopropylmalate synthase n=1 Tax=Glycine soja TaxID=3848 RepID=A0A0B2R7H9_GLYSO
Glyma.11G197600	6.06991	6.31361	2.69742	2.25872e-05	6.34806e-05	UniRef100_K7LR53 Uncharacterized protein n=1 Tax=Glycine max TaxID=3847 RepID=K7LR53_SOYBN
Glyma.07G226700	301.045	6.30868	0.350486	1.98031e-73	8.91496e-72	UniRef100_UPI000295730B uncharacterized protein At3g61260 isoform X1 n=2 Tax=Glycine max TaxID=3847 RepID=UPI000295730B
Glyma.03G078300	2862.82	6.30768	0.195206	2.24354e-230	1.00398e-227	UniRef100_I1JLR0 Uncharacterized protein n=5 Tax=Soja TaxID=1462606 RepID=I1JLR0_SOYBN
Glyma.10G293300	127.806	6.30714	0.513854	7.10977e-35	1.14702e-33	UniRef100_A0A445IUL3 Protoheme IX farnesyltransferase, mitochondrial isoform A n=1 Tax=Glycine soja TaxID=3848 RepID=A0A445IUL3_GLYSO
Glyma.13G093600	54.5752	6.29432	0.764839	1.67935e-16	1.22458e-15	UniRef100_K7LWW9 Protein kinase domain-containing protein n=4 Tax=Soja TaxID=1462606 RepID=K7LWW9_SOYBN
Glyma.06G266700	602.777	6.28995	0.300344	8.08647e-99	6.17826e-97	UniRef100_A0A0B2SUE1 Thioredoxin-like protein CXXS1 n=2 Tax=Soja TaxID=1462606 RepID=A0A0B2SUE1_GLYSO
Glyma.08G164500	53.0073	6.28385	0.786515	1.83347e-15	1.24969e-14	UniRef100_K7L748 Uncharacterized protein n=1 Tax=Glycine max TaxID=3847 RepID=K7L748_SOYBN
Glyma.02G090100	5385.32	6.2811	0.16637	0	0	UniRef100_K7K799 Protein DETOXIFICATION n=1 Tax=Glycine max TaxID=3847 RepID=K7K799_SOYBN
Glyma.05G247800	623.469	6.27795	0.253403	3.21187e-136	4.4225e-134	UniRef100_C6TEW7 Purple acid phosphatase n=2 Tax=Soja TaxID=1462606 RepID=C6TEW7_SOYBN
Glyma.07G163100	17.8154	6.27777	1.38796	2.34034e-07	8.30958e-07	UniRef100_A0A0R0J4X8 Uncharacterized protein n=1 Tax=Glycine max TaxID=3847 RepID=A0A0R0J4X8_SOYBN
Glyma.16G121800	17.9639	6.27395	1.3656	1.48727e-07	5.39429e-07	UniRef100_A0A0R0FY71 Uncharacterized protein n=1 Tax=Glycine max TaxID=3847 RepID=A0A0R0FY71_SOYBN
Glyma.17G086400	29.5891	6.2596	1.03704	1.91395e-09	8.31932e-09	UniRef100_I1MTE2 Uncharacterized protein n=2 Tax=Soja TaxID=1462606 RepID=I1MTE2_SOYBN
Glyma.10G210000	2281.87	6.25787	0.15975	0	0	UniRef100_I1LD00 Uncharacterized protein n=4 Tax=Soja TaxID=1462606 RepID=I1LD00_SOYBN
Glyma.08G159100	74.8859	6.24688	0.640165	2.21646e-22	2.20707e-21	UniRef100_K7L716 Uncharacterized protein n=2 Tax=Glycine max TaxID=3847 RepID=K7L716_SOYBN
Glyma.13G083500	5.9591	6.24528	2.7212	3.6106e-05	9.88727e-05	UniRef100_I1LW38 RRM_2 domain-containing protein n=1 Tax=Glycine max TaxID=3847 RepID=I1LW38_SOYBN
Glyma.08G159066	40.2944	6.24004	0.869487	9.89469e-13	5.57299e-12	UniRef100_A0A371F1Y8 F-box protein CPR30 (Fragment) n=1 Tax=Mucuna pruriens TaxID=157652 RepID=A0A371F1Y8_MUCPR
Glyma.13G340250	17.4598	6.23196	1.36123	1.6429e-07	5.93415e-07	NA
Glyma.04G025300	17.7848	6.22712	1.38901	2.55851e-07	9.0466e-07	UniRef100_A0A0B2SLP0 Auxin-responsive protein SAUR50 n=2 Tax=Soja TaxID=1462606 RepID=A0A0B2SLP0_GLYSO
Glyma.05G108500	5.84542	6.22694	2.70246	3.18764e-05	8.78569e-05	UniRef100_UPI0002339B6D NADPH-dependent 1-acyldihydroxyacetone phosphate reductase n=1 Tax=Glycine max TaxID=3847 RepID=UPI0002339B6D
Glyma.20G191100	41.1784	6.22412	0.924199	9.98311e-12	5.20695e-11	UniRef100_A0A0R0EQA6 Uncharacterized protein n=1 Tax=Glycine max TaxID=3847 RepID=A0A0R0EQA6_SOYBN
Glyma.09G261300	5.97758	6.22034	2.73605	4.43838e-05	0.000120123	UniRef100_I1L6L7 CAP10 domain-containing protein n=2 Tax=Soja TaxID=1462606 RepID=I1L6L7_SOYBN
Glyma.13G229100	5.89224	6.21898	2.71126	3.52957e-05	9.67241e-05	UniRef100_K7M1C1 Uncharacterized protein n=2 Tax=Soja TaxID=1462606 RepID=K7M1C1_SOYBN
Glyma.04G186000	5.8104	6.21026	2.69893	3.23144e-05	8.89813e-05	UniRef100_I1JXA0 Uncharacterized protein n=3 Tax=Soja TaxID=1462606 RepID=I1JXA0_SOYBN
Glyma.08G195100	16133.5	6.20978	0.133163	0	0	UniRef100_I1KUW3 Uncharacterized protein n=1 Tax=Glycine max TaxID=3847 RepID=I1KUW3_SOYBN
Glyma.06G051900	1362.14	6.20866	0.197467	6.98775e-218	2.50161e-215	UniRef100_K7KT79 Uncharacterized protein n=3 Tax=Soja TaxID=1462606 RepID=K7KT79_SOYBN
Glyma.13G065601	5.94988	6.20775	2.73849	4.6661e-05	0.000125896	UniRef100_A0A0R0EHA3 Uncharacterized protein n=1 Tax=Glycine max TaxID=3847 RepID=A0A0R0EHA3_SOYBN
Glyma.06G317000	5.75563	6.19684	2.69614	3.29215e-05	9.0548e-05	UniRef100_A0A445KGT4 Isoeugenol synthase 1 n=4 Tax=Soja TaxID=1462606 RepID=A0A445KGT4_GLYSO
Glyma.15G240500	150.808	6.19529	0.455454	3.44611e-42	7.10192e-41	UniRef100_A0A0R0GGG3 Uncharacterized protein n=1 Tax=Glycine max TaxID=3847 RepID=A0A0R0GGG3_SOYBN
Glyma.12G164900	17.1086	6.19112	1.36786	2.15661e-07	7.68918e-07	UniRef100_I1LT96 Protein kinase domain-containing protein n=3 Tax=Soja TaxID=1462606 RepID=I1LT96_SOYBN
Glyma.03G113600	149.542	6.18536	0.45021	5.98429e-43	1.2659e-41	UniRef100_I1JMS6 Uncharacterized protein n=1 Tax=Glycine max TaxID=3847 RepID=I1JMS6_SOYBN
Glyma.01G056900	387.321	6.1645	0.30545	9.61121e-91	6.36066e-89	UniRef100_A0A445LZB4 Uncharacterized protein n=4 Tax=Soja TaxID=1462606 RepID=A0A445LZB4_GLYSO
Glyma.19G197900	105.368	6.1589	0.574276	2.92884e-27	3.59905e-26	UniRef100_A0A445FIV7 Uncharacterized protein n=2 Tax=Soja TaxID=1462606 RepID=A0A445FIV7_GLYSO
Glyma.03G121500	39.0702	6.15658	0.890586	3.60491e-12	1.94584e-11	UniRef100_K7KEK9 Terpene cyclase/mutase family member n=2 Tax=Glycine max TaxID=3847 RepID=K7KEK9_SOYBN
Glyma.17G165500	638.911	6.15476	0.243543	1.03651e-141	1.51605e-139	UniRef100_I1MVR2 Uncharacterized protein n=2 Tax=Soja TaxID=1462606 RepID=I1MVR2_SOYBN
Glyma.14G052400	32283	6.14878	0.187892	3.1592e-236	1.50322e-233	UniRef100_A0A0R0GIS8 Uncharacterized protein n=1 Tax=Glycine max TaxID=3847 RepID=A0A0R0GIS8_SOYBN
Glyma.10G276000	136.215	6.14859	0.503336	1.26371e-34	2.02657e-33	UniRef100_I1LEY3 Uncharacterized protein n=1 Tax=Glycine max TaxID=3847 RepID=I1LEY3_SOYBN
Glyma.04G018700	5.76612	6.14695	2.74004	5.77645e-05	0.000153834	UniRef100_I1JSX0 Uncharacterized protein n=2 Tax=Soja TaxID=1462606 RepID=I1JSX0_SOYBN
Glyma.08G326000	438.631	6.14557	0.288172	2.03782e-101	1.62292e-99	UniRef100_A0A0R0J1M9 Uncharacterized protein n=1 Tax=Glycine max TaxID=3847 RepID=A0A0R0J1M9_SOYBN
Glyma.05G175500	81.2426	6.13919	0.592755	3.20533e-25	3.61935e-24	UniRef100_K7KQV6 GTP_cyclohydro2 domain-containing protein n=1 Tax=Glycine max TaxID=3847 RepID=K7KQV6_SOYBN
Glyma.04G007300	17634.4	6.1391	0.148734	0	0	UniRef100_I1JSI1 Amidophosphoribosyltransferase n=2 Tax=Soja TaxID=1462606 RepID=I1JSI1_SOYBN
Glyma.14G064400	1739.35	6.13468	0.190531	4.61209e-229	1.9701e-226	UniRef100_A0A0R0GH92 Uncharacterized protein n=1 Tax=Glycine max TaxID=3847 RepID=A0A0R0GH92_SOYBN
Glyma.03G006200	133.14	6.13465	0.470587	9.80266e-39	1.79397e-37	UniRef100_A0A0R0KD58 Lipase_GDSL domain-containing protein n=2 Tax=Soja TaxID=1462606 RepID=A0A0R0KD58_SOYBN
Glyma.07G135800	446.09	6.13125	0.282789	6.92772e-105	5.74863e-103	UniRef100_A5JUQ4 C2H2 zinc finger protein n=2 Tax=Soja TaxID=1462606 RepID=A5JUQ4_SOYBN
Glyma.11G224400	325.589	6.12108	0.319026	1.44082e-82	7.96476e-81	UniRef100_K7LRM6 Uncharacterized protein n=1 Tax=Glycine max TaxID=3847 RepID=K7LRM6_SOYBN
Glyma.04G081501	5.58274	6.11842	2.70337	4.45511e-05	0.000120532	UniRef100_A0A445KXM5 DLH domain-containing protein n=1 Tax=Glycine soja TaxID=3848 RepID=A0A445KXM5_GLYSO
Glyma.09G282700	234.369	6.0983	0.373288	4.72595e-60	1.58332e-58	UniRef100_I1L784 Uncharacterized protein n=2 Tax=Soja TaxID=1462606 RepID=I1L784_SOYBN
Glyma.20G008300	59.1541	6.09669	0.714618	6.91318e-18	5.47895e-17	UniRef100_A0A445EZ71 Uncharacterized protein n=3 Tax=Soja TaxID=1462606 RepID=A0A445EZ71_GLYSO
Glyma.18G169750	5.50344	6.0907	2.70489	5.00397e-05	0.000134424	UniRef100_UPI00103BF2D6 uncharacterized protein LOC114394816 n=1 Tax=Glycine soja TaxID=3848 RepID=UPI00103BF2D6
Glyma.05G212900	5.58084	6.08774	2.72507	5.98138e-05	0.000158909	UniRef100_UPI0003DE8405 uncharacterized AAA domain-containing protein C16E9.10c-like isoform X1 n=1 Tax=Glycine max TaxID=3847 RepID=UPI0003DE8405
Glyma.05G008600	36.9511	6.0805	0.880433	4.17446e-12	2.24072e-11	UniRef100_A0A0R0JPD4 Uncharacterized protein n=2 Tax=Glycine max TaxID=3847 RepID=A0A0R0JPD4_SOYBN
Glyma.08G076800	4916.81	6.08045	0.224175	1.4741e-163	2.74314e-161	UniRef100_A0A0R0IIN2 WAT1-related protein n=1 Tax=Glycine max TaxID=3847 RepID=A0A0R0IIN2_SOYBN
Glyma.02G004900	36.5391	6.06562	0.888954	7.43937e-12	3.92375e-11	UniRef100_A0A445LHS4 Uncharacterized protein n=2 Tax=Soja TaxID=1462606 RepID=A0A445LHS4_GLYSO
Glyma.15G173650	15.5095	6.06163	1.37054	4.1185e-07	1.42384e-06	NA
Glyma.16G164300	3460.8	6.0578	0.162326	1.34594e-306	1.53315e-303	UniRef100_I1MP39 Peroxidase n=1 Tax=Glycine max TaxID=3847 RepID=I1MP39_SOYBN
Glyma.14G221866	5.65789	6.03771	2.77212	9.77505e-05	0.000251829	NA
Glyma.11G169473	799.779	6.03659	0.23308	1.48119e-149	2.41031e-147	UniRef100_UPI000233D831 probable 2-isopropylmalate synthase n=1 Tax=Glycine max TaxID=3847 RepID=UPI000233D831
Glyma.06G298300	25.6478	6.02741	1.0742	1.76343e-08	7.01951e-08	UniRef100_A0A445KGE5 External alternative NAD(P)H-ubiquinone oxidoreductase B3, mitochondrial n=1 Tax=Glycine soja TaxID=3848 RepID=A0A445KGE5_GLYSO
Glyma.08G150901	96.2608	6.02234	0.546338	1.09301e-28	1.42364e-27	UniRef100_A0A445JEX3 Putative disease resistance protein n=1 Tax=Glycine soja TaxID=3848 RepID=A0A445JEX3_GLYSO
Glyma.02G098251	94.9506	6.02228	0.54267	8.51127e-29	1.11167e-27	UniRef100_A0A0B2QZR8 Lysine histidine transporter-like 6 n=1 Tax=Glycine soja TaxID=3848 RepID=A0A0B2QZR8_GLYSO
Glyma.09G065800	5.42287	6.01716	2.7394	8.15182e-05	0.000212134	UniRef100_A0A0R0IAT6 Peroxidase n=1 Tax=Glycine max TaxID=3847 RepID=A0A0R0IAT6_SOYBN
Glyma.01G220900	642.024	6.01703	0.257932	2.98303e-121	3.21295e-119	UniRef100_A0A445M6N8 TIR domain-containing protein n=2 Tax=Soja TaxID=1462606 RepID=A0A445M6N8_GLYSO
Glyma.05G241700	64.9722	6.00876	0.644298	7.0552e-21	6.53214e-20	UniRef100_K7KRG9 Uncharacterized protein n=1 Tax=Glycine max TaxID=3847 RepID=K7KRG9_SOYBN
Glyma.10G177100	5.38912	6.00777	2.7273	7.65879e-05	0.00020001	UniRef100_I1LC19 FAD-binding PCMH-type domain-containing protein n=3 Tax=Soja TaxID=1462606 RepID=I1LC19_SOYBN
Glyma.10G186400	45.2839	6.00528	0.778627	8.02804e-15	5.2455e-14	UniRef100_E8Z9A4 Phosphate transporter1-6 n=2 Tax=Soja TaxID=1462606 RepID=E8Z9A4_SOYBN
Glyma.20G186500	54.7919	6.00515	0.696993	5.16872e-18	4.1181e-17	UniRef100_I1NHL8 HTH myb-type domain-containing protein n=1 Tax=Glycine max TaxID=3847 RepID=I1NHL8_SOYBN
Glyma.14G178200	2518.67	5.99777	0.156516	0	0	UniRef100_I1MAX2 RING-type domain-containing protein n=1 Tax=Glycine max TaxID=3847 RepID=I1MAX2_SOYBN
Glyma.09G005600	1968.97	5.98873	0.2104	3.46669e-180	8.09397e-178	UniRef100_A0A445IV17 Aspartic proteinase A1 isoform A n=3 Tax=Soja TaxID=1462606 RepID=A0A445IV17_GLYSO
Glyma.04G055801	5.271	5.97265	2.71415	7.58155e-05	0.000198158	UniRef100_UPI000E21B684 uncharacterized protein LOC102666081 n=1 Tax=Glycine max TaxID=3847 RepID=UPI000E21B684
Glyma.17G061000	5.26719	5.9715	2.71406	7.59975e-05	0.000198606	UniRef100_I1MSN6 Uncharacterized protein n=1 Tax=Glycine max TaxID=3847 RepID=I1MSN6_SOYBN
Glyma.05G121700	1093.09	5.95507	0.22855	3.64159e-151	6.11104e-149	UniRef100_A0A0B2NPX5 Uncharacterized protein n=2 Tax=Soja TaxID=1462606 RepID=A0A0B2NPX5_GLYSO
Glyma.11G158200	241.565	5.95454	0.354746	1.79768e-63	6.47889e-62	UniRef100_I1LLH2 Uncharacterized protein n=1 Tax=Glycine max TaxID=3847 RepID=I1LLH2_SOYBN
Glyma.15G005600	1223.58	5.94824	0.205228	5.03106e-186	1.30426e-183	UniRef100_I1MCD3 Uncharacterized protein n=1 Tax=Glycine max TaxID=3847 RepID=I1MCD3_SOYBN
Glyma.14G162100	88.7848	5.93478	0.539908	3.99957e-28	5.0964e-27	UniRef100_I1MAJ9 PPM-type phosphatase domain-containing protein n=4 Tax=Soja TaxID=1462606 RepID=I1MAJ9_SOYBN
Glyma.09G087200	80.9495	5.92943	0.576899	3.59995e-25	4.05642e-24	UniRef100_K7LCL7 MFS domain-containing protein n=2 Tax=Soja TaxID=1462606 RepID=K7LCL7_SOYBN
Glyma.09G187000	16350.3	5.92347	0.186861	6.86877e-222	2.53134e-219	UniRef100_I1L4E6 Uncharacterized protein n=1 Tax=Glycine max TaxID=3847 RepID=I1L4E6_SOYBN
Glyma.04G173000	1809.75	5.89942	0.212018	8.34877e-172	1.76309e-169	UniRef100_A0A445L1G2 ABC transporter A family member 2 isoform A n=3 Tax=Soja TaxID=1462606 RepID=A0A445L1G2_GLYSO
Glyma.01G122502	4269.44	5.89877	0.407781	1.20638e-48	2.96778e-47	UniRef100_UPI00023BDAE7 uncharacterized protein LOC100527289 precursor n=1 Tax=Glycine max TaxID=3847 RepID=UPI00023BDAE7
Glyma.05G069701	320.746	5.89846	0.319637	3.62396e-77	1.77145e-75	UniRef100_I1K105 Uncharacterized protein n=2 Tax=Soja TaxID=1462606 RepID=I1K105_SOYBN
Glyma.03G033100	5.20892	5.89598	2.7454	0.000116941	0.000297456	UniRef100_A0A368UID1 Uncharacterized protein n=1 Tax=Glycine max TaxID=3847 RepID=A0A368UID1_SOYBN
Glyma.14G089066	321.942	5.88247	0.306357	1.06491e-82	5.93914e-81	UniRef100_I1M8V4 BZIP domain-containing protein n=2 Tax=Soja TaxID=1462606 RepID=I1M8V4_SOYBN
Glyma.04G022100	330.057	5.88119	0.312302	1.37712e-79	7.11069e-78	UniRef100_Q0GPI1 BZIP transcription factor bZIP46 n=2 Tax=Soja TaxID=1462606 RepID=Q0GPI1_SOYBN
Glyma.03G018400	23.2169	5.87569	1.04813	1.82502e-08	7.25262e-08	UniRef100_A0A0B2P4H4 Uncharacterized protein n=2 Tax=Soja TaxID=1462606 RepID=A0A0B2P4H4_GLYSO
Glyma.10G040600	49.4175	5.87566	0.709936	1.26813e-16	9.31217e-16	UniRef100_I1L8H7 Photosystem II reaction center Psb28 protein n=1 Tax=Glycine max TaxID=3847 RepID=I1L8H7_SOYBN
Glyma.02G224600	550.692	5.87123	0.260748	1.13364e-113	1.08986e-111	UniRef100_I1JHA8 Uncharacterized protein n=1 Tax=Glycine max TaxID=3847 RepID=I1JHA8_SOYBN
Glyma.12G110550	5.07455	5.8627	2.7414	0.000125496	0.000317776	UniRef100_A0A445GHX8 Protein N-lysine methyltransferase METTL21A isoform B n=1 Tax=Glycine soja TaxID=3848 RepID=A0A445GHX8_GLYSO
Glyma.18G176100	4.9873	5.86203	2.70593	9.7747e-05	0.000251829	UniRef100_UPI0003DE8763 B3 domain-containing transcription factor ABI3 isoform X1 n=2 Tax=Glycine max TaxID=3847 RepID=UPI0003DE8763
Glyma.14G153400	49.8867	5.85916	0.709433	9.02131e-17	6.69122e-16	UniRef100_K7M6Y8 Protein kinase domain-containing protein n=1 Tax=Glycine max TaxID=3847 RepID=K7M6Y8_SOYBN
Glyma.02G210600	3507.72	5.85751	0.187383	2.72018e-216	9.64638e-214	UniRef100_I1JGW6 RING-type domain-containing protein n=1 Tax=Glycine max TaxID=3847 RepID=I1JGW6_SOYBN
Glyma.10G142300	32.2821	5.84654	0.90861	6.36664e-11	3.13249e-10	UniRef100_K7LJD6 Uncharacterized protein n=2 Tax=Soja TaxID=1462606 RepID=K7LJD6_SOYBN
Glyma.17G116800	58.5833	5.84511	0.650413	1.23817e-19	1.0744e-18	UniRef100_K7ML64 Uncharacterized protein n=2 Tax=Soja TaxID=1462606 RepID=K7ML64_SOYBN
Glyma.14G169700	422.874	5.84367	0.27496	2.37857e-101	1.89028e-99	UniRef100_A0A445H6W2 Sulfate transporter 1.3 isoform A n=2 Tax=Glycine soja TaxID=3848 RepID=A0A445H6W2_GLYSO
Glyma.06G286700	422.687	5.82807	0.281458	8.25576e-97	6.08498e-95	UniRef100_I1KEW2 Uncharacterized protein n=1 Tax=Glycine max TaxID=3847 RepID=I1KEW2_SOYBN
Glyma.18G226850	13.5844	5.82617	1.40699	1.67452e-06	5.40766e-06	UniRef100_C0JJJ2 Rpp4 candidate 3 n=1 Tax=Glycine max TaxID=3847 RepID=C0JJJ2_SOYBN
Glyma.13G135300	318.924	5.8234	0.292189	4.33976e-89	2.76494e-87	UniRef100_A0A445HFC4 PPM-type phosphatase domain-containing protein n=2 Tax=Soja TaxID=1462606 RepID=A0A445HFC4_GLYSO
Glyma.09G202500	2691.19	5.82107	0.160836	8.69237e-289	6.95205e-286	UniRef100_I1L4U7 Uncharacterized protein n=3 Tax=Glycine max TaxID=3847 RepID=I1L4U7_SOYBN
Glyma.07G032000	177.603	5.8204	0.38165	9.43815e-53	2.60485e-51	UniRef100_I1KH36 F-box domain-containing protein n=1 Tax=Glycine max TaxID=3847 RepID=I1KH36_SOYBN
Glyma.10G046500	5368.29	5.81943	0.153772	0	0	UniRef100_I1L8N5 Uncharacterized protein n=2 Tax=Glycine max TaxID=3847 RepID=I1L8N5_SOYBN
Glyma.12G081100	92.7508	5.81822	0.531526	2.19761e-28	2.8271e-27	UniRef100_K7LTP7 zinc_ribbon_6 domain-containing protein n=1 Tax=Glycine max TaxID=3847 RepID=K7LTP7_SOYBN
Glyma.11G197500	187.219	5.8049	0.387043	1.28996e-51	3.44877e-50	UniRef100_A0A0R0HJJ3 Lipoxygenase domain-containing protein n=2 Tax=Glycine max TaxID=3847 RepID=A0A0R0HJJ3_SOYBN
Glyma.08G350700	4.97935	5.80418	2.74143	0.000143607	0.000360408	UniRef100_K7LAP4 RING-type domain-containing protein n=1 Tax=Glycine max TaxID=3847 RepID=K7LAP4_SOYBN
Glyma.01G134000	13.6483	5.80331	1.39773	1.43086e-06	4.65077e-06	UniRef100_A0A0R0LA58 Uncharacterized protein n=1 Tax=Glycine max TaxID=3847 RepID=A0A0R0LA58_SOYBN
Glyma.05G248800	4.84465	5.80101	2.70737	0.000115559	0.000294239	UniRef100_A0A0B2PN29 Homeobox-leucine zipper protein HDG11 n=2 Tax=Soja TaxID=1462606 RepID=A0A0B2PN29_GLYSO
Glyma.01G192550	4.84592	5.79169	2.71412	0.000124143	0.000314626	NA
Glyma.08G345400	2579.7	5.78415	0.151993	0	0	UniRef100_I1KZ04 Cytochrome b561 and DOMON domain-containing protein n=3 Tax=Soja TaxID=1462606 RepID=I1KZ04_SOYBN
Glyma.20G192100	30.1971	5.78351	0.925246	2.68604e-10	1.2588e-09	UniRef100_I1NHS0 Uncharacterized protein n=2 Tax=Glycine max TaxID=3847 RepID=I1NHS0_SOYBN
Glyma.15G138800	1245.47	5.7828	0.195064	1.83983e-194	5.12289e-192	UniRef100_I1MGD1 WD_REPEATS_REGION domain-containing protein n=1 Tax=Glycine max TaxID=3847 RepID=I1MGD1_SOYBN
Glyma.02G042000	981.289	5.77357	0.20116	3.2318e-182	7.83763e-180	UniRef100_A0A445LJD9 Serine acetyltransferase 4 isoform A n=1 Tax=Glycine soja TaxID=3848 RepID=A0A445LJD9_GLYSO
Glyma.01G195700	1007.78	5.76906	0.250419	2.42352e-119	2.58074e-117	UniRef100_I1J9G6 Uncharacterized protein n=2 Tax=Soja TaxID=1462606 RepID=I1J9G6_SOYBN
Glyma.16G048000	13.1928	5.76465	1.42335	2.55038e-06	8.05484e-06	UniRef100_K7MF93 Uncharacterized protein n=2 Tax=Soja TaxID=1462606 RepID=K7MF93_SOYBN
Glyma.05G146400	4097.36	5.7597	0.177216	3.58647e-233	1.66439e-230	UniRef100_I1K3K7 Uncharacterized protein n=1 Tax=Glycine max TaxID=3847 RepID=I1K3K7_SOYBN
Glyma.17G236700	4753.18	5.7568	0.13514	0	0	UniRef100_I1MXJ0 ACB domain-containing protein n=1 Tax=Glycine max TaxID=3847 RepID=I1MXJ0_SOYBN
Glyma.14G001600	2875.63	5.75626	0.170905	4.77144e-250	2.71755e-247	UniRef100_A0A445GZF0 Protein NLP5 isoform A n=2 Tax=Glycine soja TaxID=3848 RepID=A0A445GZF0_GLYSO
Glyma.15G001300	45.4034	5.74675	0.720125	1.20846e-15	8.33045e-15	UniRef100_I1MC84 Calcium-transporting ATPase n=1 Tax=Glycine max TaxID=3847 RepID=I1MC84_SOYBN
Glyma.01G020000	13.0802	5.74037	1.38884	1.6008e-06	5.17983e-06	UniRef100_A0A0B2P6D7 ABC transporter G family member 17 n=2 Tax=Soja TaxID=1462606 RepID=A0A0B2P6D7_GLYSO
Glyma.17G026700	348.998	5.73928	0.303231	1.8336e-80	9.6264e-79	UniRef100_K7MJN0 AIG1-type G domain-containing protein n=2 Tax=Soja TaxID=1462606 RepID=K7MJN0_SOYBN
Glyma.01G216800	284.931	5.72834	0.339776	1.01952e-64	3.78694e-63	UniRef100_K7K554 Uncharacterized protein n=2 Tax=Soja TaxID=1462606 RepID=K7K554_SOYBN
Glyma.13G095000	16477.3	5.72739	0.167356	6.47418e-258	3.86293e-255	UniRef100_A0A0B2QRG3 Xyloglucan endotransglucosylase/hydrolase n=2 Tax=Soja TaxID=1462606 RepID=A0A0B2QRG3_GLYSO
Glyma.13G113000	396.993	5.7273	0.266198	2.6312e-103	2.13622e-101	UniRef100_I1LY92 Uncharacterized protein n=1 Tax=Glycine max TaxID=3847 RepID=I1LY92_SOYBN
Glyma.13G203000	3018.49	5.72508	0.168933	2.03261e-253	1.17547e-250	UniRef100_A0A223FPU6 Protein DETOXIFICATION n=1 Tax=Glycine max TaxID=3847 RepID=A0A223FPU6_SOYBN
Glyma.03G043060	4.70009	5.72377	2.71212	0.000145428	0.000364663	UniRef100_A0A445L7F9 PPM-type phosphatase domain-containing protein n=1 Tax=Glycine soja TaxID=3848 RepID=A0A445L7F9_GLYSO
Glyma.11G135800	140.986	5.71975	0.412411	7.89175e-44	1.71475e-42	UniRef100_I1LJY1 C2H2-type domain-containing protein n=1 Tax=Glycine max TaxID=3847 RepID=I1LJY1_SOYBN
Glyma.03G103266	4.95516	5.71138	2.80706	0.000261967	0.000631443	UniRef100_I1KHZ5 Uncharacterized protein n=1 Tax=Glycine max TaxID=3847 RepID=I1KHZ5_SOYBN
Glyma.06G201200	496.085	5.69316	0.263404	6.23926e-105	5.1888e-103	UniRef100_A0A0B2Q987 Zinc finger protein ZAT4 n=2 Tax=Soja TaxID=1462606 RepID=A0A0B2Q987_GLYSO
Glyma.16G076866	4.64406	5.68977	2.71999	0.000166956	0.000414934	NA
Glyma.20G113700	380.948	5.68673	0.302891	1.06803e-79	5.52992e-78	UniRef100_K7N2V5 Uncharacterized protein n=2 Tax=Soja TaxID=1462606 RepID=K7N2V5_SOYBN
Glyma.15G261500	12.3865	5.68527	1.39952	2.50121e-06	7.90554e-06	UniRef100_K7ME10 Uncharacterized protein n=2 Tax=Soja TaxID=1462606 RepID=K7ME10_SOYBN
Glyma.01G003200	12.7564	5.67729	1.4117	2.63534e-06	8.30782e-06	UniRef100_K7K127 Acetyltransf_11 domain-containing protein n=1 Tax=Glycine max TaxID=3847 RepID=K7K127_SOYBN
Glyma.02G044300	12.5884	5.67444	1.43493	3.94993e-06	1.22033e-05	UniRef100_K7K6F3 RING-type domain-containing protein n=2 Tax=Soja TaxID=1462606 RepID=K7K6F3_SOYBN
Glyma.13G205100	44.4977	5.67358	0.712952	8.14598e-16	5.67681e-15	UniRef100_A0A445I7M4 Uncharacterized protein n=1 Tax=Glycine soja TaxID=3848 RepID=A0A445I7M4_GLYSO
Glyma.13G052800	191.582	5.67153	0.357723	7.68973e-57	2.34244e-55	UniRef100_A0A0B2PGI4 Hyoscyamine 6-dioxygenase n=2 Tax=Soja TaxID=1462606 RepID=A0A0B2PGI4_GLYSO
Glyma.13G089400	4.59119	5.66274	2.72433	0.000184219	0.000455159	UniRef100_A0A0R0GX00 Uncharacterized protein n=1 Tax=Glycine max TaxID=3847 RepID=A0A0R0GX00_SOYBN
Glyma.04G105100	74.9748	5.65193	0.546638	1.65531e-25	1.89128e-24	UniRef100_K7KJB7 Uncharacterized protein n=1 Tax=Glycine max TaxID=3847 RepID=K7KJB7_SOYBN
Glyma.08G058800	35.4854	5.64585	0.789802	5.3391e-13	3.06735e-12	UniRef100_I1KQQ0 Flavokinase domain-containing protein n=1 Tax=Glycine max TaxID=3847 RepID=I1KQQ0_SOYBN
Glyma.02G130816	4.73955	5.64485	2.78587	0.000270815	0.000651225	UniRef100_A0A445LND1 Phosphoenolpyruvate carboxylase 4 n=1 Tax=Glycine soja TaxID=3848 RepID=A0A445LND1_GLYSO
Glyma.20G122900	12.3671	5.64374	1.43834	4.54611e-06	1.39432e-05	UniRef100_K7N323 Acyl-[acyl-carrier-protein] hydrolase n=2 Tax=Soja TaxID=1462606 RepID=K7N323_SOYBN
Glyma.20G241300	34.6217	5.64186	0.798421	1.37615e-12	7.67045e-12	UniRef100_I1NJ66 Uncharacterized protein n=2 Tax=Soja TaxID=1462606 RepID=I1NJ66_SOYBN
Glyma.15G021100	4592	5.63897	0.131311	0	0	UniRef100_A0A445GMX3 Protein CHUP1, chloroplastic isoform C n=1 Tax=Glycine soja TaxID=3848 RepID=A0A445GMX3_GLYSO
Glyma.09G037000	126.1	5.63028	0.437221	2.8254e-38	5.06228e-37	UniRef100_A0A0B2PUQ7 Uncharacterized protein n=2 Tax=Soja TaxID=1462606 RepID=A0A0B2PUQ7_GLYSO
Glyma.04G242500	4.52974	5.6297	2.7196	0.000191649	0.000472121	UniRef100_K7KM38 Uncharacterized protein n=3 Tax=Soja TaxID=1462606 RepID=K7KM38_SOYBN
Glyma.03G178700	196.934	5.62875	0.365058	1.89928e-54	5.45824e-53	UniRef100_I1JPK0 Uncharacterized protein n=1 Tax=Glycine max TaxID=3847 RepID=I1JPK0_SOYBN
Glyma.08G132700	387.068	5.6279	0.268591	1.98666e-98	1.50562e-96	UniRef100_K7L6G1 GTP_cyclohydro2 domain-containing protein n=1 Tax=Glycine max TaxID=3847 RepID=K7L6G1_SOYBN
Glyma.20G238000	2560.46	5.62668	0.181791	4.40945e-211	1.52065e-208	UniRef100_I1NJ37 Phospholipase n=1 Tax=Glycine max TaxID=3847 RepID=I1NJ37_SOYBN
Glyma.10G179300	4.5549	5.62185	2.73319	0.000211013	0.000515969	UniRef100_A0A0R0I2W6 Uncharacterized protein n=2 Tax=Soja TaxID=1462606 RepID=A0A0R0I2W6_SOYBN
Glyma.13G246900	4.5014	5.62123	2.71691	0.000192831	0.000474753	UniRef100_I1M2D3 Uncharacterized protein n=2 Tax=Soja TaxID=1462606 RepID=I1M2D3_SOYBN
Glyma.17G114700	6381.1	5.61897	0.149958	0	0	UniRef100_A0A0R0FK09 SPX domain-containing protein 1 n=2 Tax=Soja TaxID=1462606 RepID=A0A0R0FK09_SOYBN
Glyma.05G158850	34.2024	5.61707	0.810939	3.29782e-12	1.78572e-11	NA
Glyma.14G035100	821.261	5.6168	0.196235	3.27608e-181	7.84381e-179	UniRef100_C6TN39 Uncharacterized protein n=3 Tax=Soja TaxID=1462606 RepID=C6TN39_SOYBN
Glyma.02G058100	19.9619	5.61643	1.08621	1.34409e-07	4.8972e-07	UniRef100_K7K6M9 Peptidase_M3 domain-containing protein n=1 Tax=Glycine max TaxID=3847 RepID=K7K6M9_SOYBN
Glyma.06G259500	35.4498	5.61144	0.805155	1.25166e-12	7.00353e-12	UniRef100_K7KXF9 Uncharacterized protein n=2 Tax=Soja TaxID=1462606 RepID=K7KXF9_SOYBN
Glyma.06G276400	4275.74	5.61013	0.173246	9.84561e-232	4.51337e-229	UniRef100_A0A0B2RH57 2-aminoethanethiol dioxygenase n=3 Tax=Soja TaxID=1462606 RepID=A0A0B2RH57_GLYSO
Glyma.03G139300	967.327	5.60207	0.219196	5.50275e-146	8.44279e-144	UniRef100_I1JNF3 EGF-like domain-containing protein n=2 Tax=Soja TaxID=1462606 RepID=I1JNF3_SOYBN
Glyma.13G372200	12112.1	5.60112	0.152512	1.5111e-296	1.45646e-293	UniRef100_I1M611 D-3-phosphoglycerate dehydrogenase n=1 Tax=Glycine max TaxID=3847 RepID=I1M611_SOYBN
Glyma.12G183400	153.403	5.59799	0.387737	1.26075e-47	3.03208e-46	UniRef100_A0A0B2R6T4 Fatty acyl-CoA reductase n=2 Tax=Soja TaxID=1462606 RepID=A0A0B2R6T4_GLYSO
Glyma.10G063900	1209.43	5.5943	0.204957	6.733e-166	1.28474e-163	UniRef100_K7LHR5 Uncharacterized protein n=1 Tax=Glycine max TaxID=3847 RepID=K7LHR5_SOYBN
Glyma.13G331100	966.973	5.59089	0.227851	1.10745e-134	1.45556e-132	UniRef100_I1M4Q9 Uncharacterized protein n=2 Tax=Soja TaxID=1462606 RepID=I1M4Q9_SOYBN
Glyma.11G025800	320.615	5.58639	0.292305	8.82093e-82	4.77779e-80	UniRef100_C6SZS0 Uncharacterized protein n=2 Tax=Soja TaxID=1462606 RepID=C6SZS0_SOYBN
Glyma.04G147600	1516.7	5.58458	0.192455	5.07075e-187	1.35184e-184	UniRef100_A0A0B2SL50 SPX domain-containing protein 1 n=2 Tax=Soja TaxID=1462606 RepID=A0A0B2SL50_GLYSO
Glyma.20G050100	19.0034	5.57971	1.10633	3.08599e-07	1.0803e-06	UniRef100_A0A0B2S7Y2 WD_REPEATS_REGION domain-containing protein n=1 Tax=Glycine soja TaxID=3848 RepID=A0A0B2S7Y2_GLYSO
Glyma.09G118900	298.306	5.57861	0.304613	1.73378e-75	8.13643e-74	UniRef100_A0A0R0I7B0 AA_permease_C domain-containing protein n=3 Tax=Soja TaxID=1462606 RepID=A0A0R0I7B0_SOYBN
Glyma.11G142200	708.731	5.57235	0.273119	3.48561e-93	2.41297e-91	UniRef100_K7LPQ5 Uncharacterized protein n=1 Tax=Glycine max TaxID=3847 RepID=K7LPQ5_SOYBN
Glyma.17G162100	4.4202	5.57011	2.73146	0.000235971	0.000572784	UniRef100_C6TGK3 Uncharacterized protein n=1 Tax=Glycine max TaxID=3847 RepID=C6TGK3_SOYBN
Glyma.17G083000	113.24	5.56071	0.43816	3.11418e-37	5.40203e-36	UniRef100_I1MTA5 Uncharacterized protein n=1 Tax=Glycine max TaxID=3847 RepID=I1MTA5_SOYBN
Glyma.15G116900	496.66	5.56037	0.303238	3.51627e-76	1.6795e-74	UniRef100_I1MFQ3 Uncharacterized protein n=2 Tax=Soja TaxID=1462606 RepID=I1MFQ3_SOYBN
Glyma.11G196700	26.2345	5.56025	0.898925	3.99145e-10	1.84277e-09	UniRef100_I1LL36 Alpha-carbonic anhydrase domain-containing protein n=3 Tax=Soja TaxID=1462606 RepID=I1LL36_SOYBN
Glyma.07G154300	955.716	5.55953	0.193765	1.602e-182	3.93589e-180	UniRef100_K7L1X9 GRAS domain-containing protein n=2 Tax=Soja TaxID=1462606 RepID=K7L1X9_SOYBN
Glyma.13G269100	894.009	5.5587	0.20145	2.76876e-168	5.47778e-166	UniRef100_I1M2Z6 Uncharacterized protein n=2 Tax=Soja TaxID=1462606 RepID=I1M2Z6_SOYBN
Glyma.05G206500	4.41766	5.55602	2.74029	0.000255901	0.000617811	UniRef100_A0A0B2QQ38 Actin-depolymerizing factor 7 n=2 Tax=Soja TaxID=1462606 RepID=A0A0B2QQ38_GLYSO
Glyma.15G101600	486.407	5.5514	0.251515	1.64181e-108	1.44872e-106	UniRef100_A0A445GRN8 F-box/kelch-repeat protein isoform B n=3 Tax=Soja TaxID=1462606 RepID=A0A445GRN8_GLYSO
Glyma.03G214300	2247.1	5.54515	0.186088	3.12877e-197	8.9099e-195	UniRef100_I1JQL8 Uncharacterized protein n=2 Tax=Soja TaxID=1462606 RepID=I1JQL8_SOYBN
Glyma.07G067000	885.477	5.54473	0.203448	2.89453e-165	5.49522e-163	UniRef100_I1KI61 Uncharacterized protein n=3 Tax=Soja TaxID=1462606 RepID=I1KI61_SOYBN
[truncated: 13,563 more rows]

## Sheet: Supplementary Table 3
Supplementary Table 3: List of differentially expressed genes identified in the Williams 82 /USDA110 vs G. soja/USDA110 comparison.
[truncated: 9,756 more rows]

[truncated: 1 more sheets: Supplementary Table 4]
